# Supplementary material for: KIF2C regulates synaptic plasticity and cognition in mice through dynamic microtubule depolymerization
Source: eLife. 2022 Feb 9;11:e72483. doi: 10.7554/eLife.72483 (PMC8828051; doi:10.7554/eLife.72483)
Supplement: Figure 2—figure supplement 1—source data 1. — Values for mEPSCs of control and shkif2c neurons; Values for kif2c mRNA levels; Values for mEPSCs of control and shkif2c neurons before and after cLTP. [file elife-72483-fig2-figsupp1-data1.xlsx]

## Sheet: Sheet1
Figure2- figure supplement1- source data1
	FigureS1A				FigureS1B						FigureS1B				FigureS1C						FigureS1C				Figure S1D				FigureS1E										FigureS1E						FigureS1F
	% of control				mEPSC amplitude cumulative probability curves						Amplitude pA				mEPSC frequency cumulative probability curves						Frequency Hz				control	shKIF2C			mEPSC amplitude cumulative probability curves										Amplitude pA						mEPSC frequency cumulative probability curves
	control	shKIF2C			control		shKIF2C				control	shKIF2C			control		shKIF2C				control	shKIF2C			135.734	25.4943			WT+ACSF		WT+cLTP		shKIF2C+ACSF		shKIF2C+cLTP				WT+ACSF	WT+cLTP	shKIF2C+ACSF	shKIF2C+cLTP			WT+ACSF		WT+cLTP		shKIF2C+ACSF
	104.774	68.9544			2.441	0.0140548	5.493	0.282209			42.8158	20.471			1.6	0.0140588	0.4	0.0121981			7.81242	8.30802			65.1531	8.56325			3.662	0.0526593	3.662	0.0468604	6.104	0.0608273	4.883	0.0898876			18.67	23.5863	27.906	26.4087			174.5	0.4	45.6	0.295858	47.3
	111.477	70.8628			3.052	0.0843289	6.1	0.306748			23.2665	18.5469			1.8	0.0281175	1.3	0.0365943			4.59063	11.5171			35.8033	9.89252			4.88	0.105319	4.883	0.0937207	6.714	0.243309	5.493	0.224719			16.832	26.8801	32.947	25.3175			219.5	0.8	57.4	0.591716	104.1
	91.8471	69.1783			3.662	0.196767	6.104	0.527607			47.2969	27.4874			1.9	0.0562351	2.2	0.0487924			6.75664	10.7893			170.637	18.8303			4.883	0.157978	5.493	0.187441	7.324	0.6691	6.1	0.269663			17.442	26.7745	27.121	25.8958			230.8	1.2	57.5	0.887574	132.5
	105.931	53.3238			4.272	0.449754	6.71	0.564417			28.9096	11.4215			2.4	0.0702938	2.9	0.0609905			5.30123	12.2322			118.247	28.8541			5.49	0.210637	6.104	0.468604	7.935	1.15572	6.104	0.539326			16.627	27.9454	21.879	26.1576			324.2	1.6	58.15	1.18343	142
	102.347	49.4799			4.883	0.885453	6.714	1.20245			14.0738	17.3492			2.6	0.0843526	3.3	0.0731886			2.06815	9.34593			74.4256	44.3037			5.493	0.579252	6.714	0.749766	8.545	1.82482	6.71	0.58427			16.627	26.6998	29.742	25.9238			326.2	2	74.9	1.47929	148.2
	83.6229	73.4301			5.493	1.67252	7.32	1.22699			22.5327	19.0717			2.7	0.0984114	3.6	0.0853867			3.58337	9.29641							6.1	0.73723	7.324	1.49953	9.155	2.31144	6.714	1.1236			24.142	17.9468	30.661	27.52			389.7	2.4	125.6	1.77515	186.5
					6.104	2.4877	7.324	2.1227			17.0132	35.2463			3	0.11247	3.9	0.0975848			3.55026	13.9866							6.104	1.63244	7.935	2.43674	9.766	3.52798	7.32	1.25843			14.73	20.1847	26.872	29.0899			405.05	2.8	155.7	2.07101	219
					6.714	3.3591	7.935	3.41104			27.0229	16.8984			3.6	0.126529	4	0.109783			12.9151	3.23162							6.71	1.79042	8.545	3.98313	10.376	5.59611	7.324	1.79775			22.836	24.2323		36.0551			415.8	3.2	167.4	2.36686	221.7
					7.324	4.39916	7.94	3.42331			9.77419	37.3837			3.8	0.140588	4.2	0.121981			4.86858	12.2608							6.714	3.1069	9.155	5.76382	10.986	7.17762	7.935	2.74157			21.944	27.4922		25.1471			424.1	3.6	181.6	2.66272	385.857
					7.935	5.8468	8.545	4.7362			16.4686	32.5565			4.2	0.154646	4.3	0.146377			5.30038	8.23347							7.32	3.42285	9.16	5.95127	11.597	8.88078	7.94	2.78652			24.341						469.9	4	187.3	2.95858	385.871
					8.545	7.37878	8.55	4.74847			17.3381	38.0174			4.6	0.168705	4.4	0.158575			8.00559	10.0909							7.324	5.84518	9.766	8.29428	12.207	10.8881	8.545	4.62921									507.15	4.4	190.3	3.25444	401.071
					9.155	9.07941	9.155	6.51534			18.2996	17.623			4.7	0.182764	5.1	0.207368			14.37	2.6346							7.935	9.3207	9.77	8.34114	12.817	12.7129	8.55	4.89888									515.4	4.8	216.7	3.5503	417.65
					9.766	11.0892	9.16	6.52761			21.8455	14.2519			4.9	0.196823	5.2	0.219566			10.2518	5.46963							7.94	9.84729	10.376	10.2156	13.428	14.2944	9.155	6.78652									589.2	5.2	229.48	3.84615	423.3
					10.376	13.1131	9.766	8.57669			15.3993	22.5438			5.2	0.210881	5.4	0.231764			13.4467	4.20323							8.545	12.7435	10.986	12.8866	14.038	17.0316	9.16	7.01124									602.867	5.6	255.175	4.14201	433.55
					10.986	15.8398	9.77	8.58896				16.9877			5.3	0.22494	5.7	0.25616				2.22331							8.55	13.1122	10.99	12.9803	14.648	19.4039	9.766	8.98876									604.833	6	281.2	4.43787	447.786
					11.597	18.7351	10.376	11.1779				32.9388			5.4	0.238999	5.8	0.268358				6.20338							9.155	16.9036	11.597	16.0731	15.259	20.8029	9.77	9.30337									634.9	6.4	287.8	4.73373	459.5
					12.207	22.052	10.38	11.1902							5.6	0.267117	5.9	0.280556											9.16	17.0616	11.6	16.1668	15.869	23.236	10.376	10.9663									652.95	6.8	324.5	5.02959	461.45
					12.817	25.2003	10.986	13.8282							5.8	0.295234	6	0.292754											9.766	21.169	12.207	18.5567	16.479	25.3041	10.38	11.1011									658.2	7.2	337.2	5.32544	465.714
					13.428	28.0253	11.597	16.454							6	0.323352	6.1	0.304952											9.77	21.643	12.817	21.2277	17.09	26.8248	10.986	13.618									693.05	7.6	343	5.6213	468.4
					14.038	31.1455	11.6	16.4663							6.2	0.33741	6.2	0.317151											10.376	25.2238	13.428	23.477	17.7	28.6496	10.99	13.7528									706.825	8	371.288	5.91716	471.1
					14.648	34.35	12.207	19.4233							6.3	0.351469	6.4	0.341547											10.38	25.4871	13.43	23.5239	18.311	30.4136	11.597	15.5506									721.65	8.4	378.65	6.21302	479.129
					15.259	36.9501	12.21	19.4601							6.4	0.379587	6.5	0.365943											10.986	28.8046	14.038	25.7263	18.921	32.9075	11.6	15.5955									757.1	8.8	399.3	6.50888	483.3
					15.869	39.8735	12.817	22.6135							6.7	0.421763	6.7	0.378141											10.99	29.1206	14.04	25.7732	19.531	34.6715	12.207	18.0225									783.2	9.2	402.6	6.80473	484
					16.479	42.3331	13.428	25.9264							6.9	0.449881	6.8	0.402537											11.597	32.9647	14.648	28.3505	20.142	36.618	12.21	18.0674									785.49	9.6	416.1	7.10059	493.5
					17.09	45.1581	14.038	29.1534							7	0.463939	7.2	0.439131											11.6	33.544	14.65	28.4442	20.752	38.3212	12.817	19.9101									809.533	10	429.12	7.39645	498.2
					17.7	47.5755	14.04	29.1656							7.1	0.477998	7.3	0.475726											12.207	36.5456	15.259	30.8341	21.362	40.3893	12.82	20.0899									829.05	10.4	434.333	7.69231	506.843
					18.311	50.0351	14.648	32.3313							7.3	0.492057	7.4	0.536716											12.21	36.8615	15.26	30.9747	21.973	42.8224	13.428	22.0674									852.433	10.8	465.3	7.98817	509.9
					18.921	52.4947	14.65	32.3436							7.4	0.520174	7.5	0.548914											12.817	39.8631	15.869	33.5052	22.583	44.5255	13.43	22.1573									870.267	11.2	467.267	8.28402	520.85
					19.531	54.7857	15.259	35.4724							7.5	0.576409	7.6	0.561112											12.82	40.0737	15.87	33.552	23.193	46.4112	14.038	23.8202									878.3	11.6	482.75	8.57988	523.171
					20.142	56.669	15.26	35.5092							7.6	0.590468	7.7	0.573311											13.428	43.0226	16.479	35.3796	23.804	47.9319	14.04	23.9551									907	12	500.1	8.87574	540.75
					20.752	58.4399	15.869	38.0491							7.7	0.632644	7.8	0.609905											13.43	43.2859	17.09	37.4883	24.414	49.4526	14.648	26.0674									924.522	12.4	510.3	9.1716	557.3
					21.362	60.4638	16.479	40.5767							7.9	0.660762	7.9	0.634301											14.038	45.6556	17.7	39.597	25.024	50.8516	14.65	26.1124									924.79	12.8	513.45	9.46746	568.317
					21.973	62.052	17.09	43.0184							8	0.674821	8	0.670895											14.04	45.8136	18.311	41.612	25.635	52.7372	15.259	27.9551									942.917	13.2	517.8	9.76331	580.1
					22.583	63.8791	17.7	45.3988							8.1	0.702938	8.1	0.683093											14.648	48.3412	18.921	43.4864	26.245	54.0754	15.869	29.4382									952.833	13.6	554.25	10.0592	580.3
					23.19	63.8932	18.311	47.4969							8.2	0.745115	8.2	0.719688											14.65	48.5519	19.53	43.5801	26.25	54.1363	15.87	29.573									953	14	559.52	10.355	586.186
					23.193	65.5517	18.921	50.1227							8.3	0.815408	8.3	0.744084											15.259	50.2896	19.531	44.9391	26.855	55.1703	16.479	31.1011									965.2	14.4	562.4	10.6509	595.057
					23.804	66.915	19.531	52.1104							8.4	0.857585	8.5	0.76848											15.26	50.3949	20.14	45.0328	27.466	56.9343	16.48	31.1461									968.19	14.8	565.9	10.9467	602.3
					24.414	68.461	20.142	54.0859							8.5	0.885702	8.6	0.805074											15.869	52.8173	20.142	46.6729	28.076	58.455	17.09	32.809									968.42	15.2	569.1	11.2426	612.129
					25.024	69.754	20.752	55.9387							8.6	0.927879	8.7	0.866065											15.87	52.9226	20.75	46.7198	28.687	59.6715	17.7	33.9775									969.25	15.6	575.2	11.5385	615.714
					25.635	71.2157	21.362	57.8282							8.7	0.941937	8.8	0.890461											16.479	54.555	20.752	48.1724	29.297	60.5231	18.311	35.5056									971.2	16	583.475	11.8343	620.143
					26.245	72.5088	21.97	57.8528							8.8	0.984114	8.9	0.96365											16.48	54.7657	21.362	50.0937	29.907	61.9221	18.92	35.5955									983.833	16.4	586.2	12.1302	621.243
					26.855	73.6472	21.973	59.6564							8.9	1.02629	9	0.988046											17.09	56.5561	21.973	51.1715	30.518	62.8345	18.921	36.8539									987.911	16.8	592.66	12.426	622.65
					27.466	74.4483	22.583	61.3129							9	1.09658	9.1	1.00024											17.7	58.3465	22.58	51.2184	31.128	63.9903	19.53	36.9888									992.85	17.2	595.4	12.7219	629.671
					28.076	75.5727	23.193	62.773							9.2	1.15282	9.2	1.09783											18.31	58.6098	22.583	52.343	31.738	64.9635	19.531	38.2022									1011.6	17.6	597.82	13.0178	629.729
					28.687	76.6409	23.804	64.454							9.3	1.18094	9.3	1.11003											18.311	60.5582	23.19	52.3899	32.349	66.7275	20.142	39.236									1012.93	18	602.925	13.3136	630.2
					29.297	77.681	24.414	66.1104							9.4	1.23717	9.4	1.21981											18.92	60.8215	23.193	53.9831	32.959	67.8832	20.75	39.3258									1014.1	18.4	605.38	13.6095	635.086
					29.907	78.3556	25.024	67.546							9.5	1.29341	9.5	1.3052											18.921	62.4013	23.8	54.03	33.569	69.0389	20.752	40.5843									1029.3	18.8	608.35	13.9053	647.75
					29.91	78.3696	25.635	68.6258							9.6	1.3637	9.6	1.35399											19.53	62.4539	23.804	55.4358	34.18	69.8297	21.36	40.764									1035.53	19.2	618.875	14.2012	651.429
					30.518	79.2551	26.245	69.8773							9.7	1.41994	9.7	1.40278											19.531	63.5071	24.414	57.0291	34.79	70.9854	21.362	41.9326									1044.7	19.6	632.78	14.497	678.2
					31.128	79.9859	26.855	71.1534							9.8	1.54646	9.8	1.45157											20.14	63.5598	25.024	57.8725	35.4	72.2628	21.97	42.1124									1054.7	20	639.15	14.7929	680.65
					31.738	80.8433	27.466	72.2699							9.9	1.58864	9.9	1.50037											20.142	65.1922	25.635	59.2784	36.011	73.6618	21.973	43.5506									1061.68	20.4	644.311	15.0888	687.629
					32.349	81.4898	28.076	73.4233							10	1.64488	10	1.56136											20.75	65.2975	26.245	60.8247	36.621	74.5742	22.58	43.5955									1091.3	20.8	653.9	15.3846	689.114
					32.959	82.1926	28.687	74.4172							10.1	1.67299	10.1	1.58575											20.752	66.5613	26.855	61.9494	37.231	75.365	22.583	44.8989									1095.28	21.2	658.462	15.6805	702.233
					33.569	82.7688	29.297	75.4724							10.2	1.74329	10.2	1.64674											21.36	66.614	26.86	61.9963	37.842	76.2165	23.19	45.0337									1103.42	21.6	662.778	15.9763	703.386
					34.18	83.3872	29.907	76.319							10.3	1.81358	10.3	1.65894											21.362	67.4566	27.466	63.2615	38.452	76.8248	23.193	46.1124									1104.82	22	669.1	16.2722	705.85
					34.79	84.1181	30.518	77.2025							10.4	1.86982	10.4	1.73213											21.97	67.6145	27.47	63.3552	39.063	77.6764	23.804	47.6854									1107.41	22.4	673.633	16.568	712.514
					35.4	84.7084	31.128	78.0368							10.5	1.89793	10.5	1.80532											21.973	68.7204	28.076	64.6204	39.673	78.4672	24.41	47.7303									1117.69	22.8	675.1	16.8639	714.186
					36.011	85.4392	31.738	78.9571							10.6	1.92605	10.6	1.85411											22.58	68.8784	28.687	65.6514	40.283	79.8662	24.414	49.1236									1131.6	23.2	683.7	17.1598	718.371
					36.621	85.9733	32.349	79.865							10.7	1.96823	10.7	1.9029											22.583	70.0895	29.297	67.0103	40.894	80.5961	25.024	50.2921									1148.39	23.6	711.533	17.4556	739
					37.231	86.5636	32.959	80.7853							10.8	1.99634	10.8	1.96389											23.193	71.248	29.3	67.0572	41.504	81.5693	25.635	51.4157									1162.2	24	716.04	17.7515	752.114
					37.842	87.168	33.569	81.362							10.9	2.0104	10.9	1.98829											23.8	71.3533	29.907	68.463	42.114	82.4818	26.245	52.3596									1209.85	24.4	734.1	18.0473	759.7
					38.452	87.702	34.18	82.184							11	2.0807	11	2.03708											23.804	72.6698	30.518	69.4939	42.725	83.2725	26.25	52.4045									1224.8	24.8	741.95	18.3432	761.45
					39.063	88.0394	34.79	82.9693							11.1	2.12287	11.1	2.08587											24.41	72.7225	30.52	69.5408	43.335	84.1241	26.855	53.573									1249.16	25.2	753.05	18.6391	763.343
					39.673	88.4188	35.4	83.5828							11.2	2.19317	11.2	2.14687											24.414	73.9863	31.128	70.5248	43.945	84.4891	26.86	53.6629									1250.1	25.6	763.925	18.9349	765.1
					40.283	88.8405	36.011	84.2454							11.3	2.23534	11.3	2.20786											25.02	74.0916	31.13	70.6186	44.556	85.4015	27.466	54.5169									1251.31	26	765	19.2308	774.129
					40.894	89.3465	36.621	84.7362							11.4	2.26346	11.4	2.22005											25.024	74.8289	31.738	71.8838	45.166	86.4355	27.47	54.5618									1257.24	26.4	768.811	19.5266	775.743
					41.504	89.6135	37.231	85.3742							11.5	2.29158	11.5	2.32984											25.635	75.8294	32.349	72.9616	45.776	87.0438	28.076	55.5506									1266.44	26.8	790.622	19.8225	783.2
					42.114	90.0351	37.842	85.9018							11.6	2.36187	11.6	2.36643											26.245	76.8299	32.35	73.1022	46.387	87.8954	28.687	56.8539									1268.02	27.2	791.8	20.1183	783.929
					42.725	90.4568	38.452	86.4049							11.7	2.40405	11.7	2.37863											26.25	76.9352	32.959	74.2268	46.997	88.382	28.69	56.9888									1269.57	27.6	798.362	20.4142	787.4
					43.335	90.7941	39.063	86.8834							11.8	2.46028	11.8	2.42742											26.855	78.0411	33.569	75.3046	47.607	89.1727	29.297	58.1124									1290.84	28	802.65	20.7101	787.886
					43.945	91.019	39.673	87.3006							11.9	2.4884	11.9	2.51281											26.86	78.1464	33.57	75.3515	48.218	89.781	29.3	58.1573									1300.07	28.4	816.9	21.0059	799.2
					44.556	91.3844	40.283	87.8528							12	2.50246	12	2.62259											27.466	78.8836	34.18	76.851	48.828	90.2676	29.907	59.5506									1303.87	28.8	841.1	21.3018	801.2
					45.166	91.6655	40.894	88.2577							12.1	2.61493	12.1	2.65919											27.47	79.0943	34.79	77.7413	49.438	90.8759	29.91	59.5955									1318.2	29.2	848.5	21.5976	804.5
					45.776	91.9325	41.504	88.6994							12.2	2.68522	12.2	2.69578											28.076	79.9368	35.4	78.7723	50.049	91.4234	30.518	60.5843									1326.13	29.6	849.7	21.8935	808.743
					46.387	92.2558	42.114	89.1043							12.3	2.75552	12.3	2.76897											28.08	80.0421	36.011	79.4752	50.659	92.2141	30.52	60.6292									1326.54	30	850.18	22.1893	819.75
					46.997	92.5369	42.725	89.6196							12.4	2.85393	12.4	2.79336											28.687	81.148	36.621	80.4124	51.27	92.5182	31.128	61.6629									1327.4	30.4	857.367	22.4852	828.343
					47.607	92.9445	42.73	89.6319							12.5	2.91016	12.5	2.84216											28.69	81.2006	37.23	80.553	51.88	92.7007	31.13	61.7079									1346.65	30.8	861.7	22.7811	832.271
					48.218	93.3099	43.335	90.0245							12.6	2.95234	12.6	2.89095											29.297	81.9379	37.231	81.3496	52.49	93.1873	31.738	63.236									1348.3	31.2	866.544	23.0769	833.214
					48.828	93.577	43.945	90.3436							12.7	2.99452	12.7	2.95194											29.3	81.9905	37.842	82.3805	53.101	93.6131	32.349	64.5843									1352.5	31.6	870.42	23.3728	841.4
					49.438	93.8018	44.556	90.7239							12.8	3.09293	12.8	3.02513											29.907	82.9384	38.452	82.9897	53.711	94.2214	32.35	64.6292									1353.87	32	884.275	23.6686	847.957
					50.049	93.9986	45.166	90.9325							12.9	3.14916	12.9	3.12271											29.91	83.0964	39.06	83.0366	54.321	94.6472	32.959	65.8427									1358.34	32.4	888.1	23.9645	849.429
					50.659	94.1251	45.776	91.3865							13	3.24757	13	3.15931											30.518	83.623	39.063	83.8332	54.932	94.8905	33.569	66.9213									1365.26	32.8	911.756	24.2604	856.5
					51.27	94.3078	46.387	91.7914							13.1	3.28975	13.1	3.2325											31.128	84.3602	39.673	84.5361	55.542	95.1338	33.57	67.0112									1368.52	33.2	917.983	24.5562	857.829
					51.88	94.4624	46.997	92.1472							13.2	3.31787	13.2	3.30568											31.738	84.8341	40.283	85.2858	56.152	95.4988	34.18	68.2697									1393	33.6	934.98	24.8521	867.233
					52.49	94.603	47.607	92.3926							13.3	3.33193	13.3	3.35448											31.74	84.8868	40.894	85.9888	56.763	95.6204	34.79	69.3933									1397.46	34	937.489	25.1479	868.52
					53.101	94.8981	48.218	92.6135							13.4	3.3741	13.4	3.40327											32.349	85.5187	41.504	86.7854	57.373	95.9854	35.4	70.5169									1398.64	34.4	940.44	25.4438	873.6
					53.711	95.0527	48.828	92.8834							13.5	3.51469	13.5	3.45206											32.959	86.0453	42.11	86.8322	57.983	96.1071	36.01	70.5618									1412.1	34.8	940.933	25.7396	874.2
					54.321	95.2214	49.438	93.1902							13.6	3.57093	13.6	3.50085											32.96	86.0979	42.114	87.254	58.594	96.3504	36.011	71.3708									1412.27	35.2	942.1	26.0355	875.7
					54.932	95.3338	50.049	93.4969							13.7	3.6131	13.7	3.58624											33.569	86.7825	42.725	87.8632	59.204	96.472	36.62	71.4157									1416.3	35.6	943	26.3314	877.05
					55.542	95.4884	50.659	93.6564							13.8	3.6834	13.8	3.72042											34.18	87.2038	42.73	87.91	59.814	96.7762	36.621	72.6292									1420.64	36	967.3	26.6272	878.957
					56.152	95.6008	51.27	94.0245							13.9	3.72557	13.9	3.818											34.79	87.783	43.335	88.3786	60.425	96.837	37.23	72.7191									1431.85	36.4	970.743	26.9231	891.443
					56.763	95.7554	51.88	94.2577							14	3.79587	14	3.92779											35.4	88.4676	43.34	88.4255	61.035	96.8978	37.231	73.9775									1432.04	36.8	972.067	27.2189	898.443
					57.373	95.9382	52.49	94.5153							14.1	3.8521	14.1	3.98878											36.011	88.8889	43.945	88.8941	61.646	97.0195	37.84	74.0225									1444.76	37.2	977.9	27.5148	917.5
					57.983	96.0647	53.101	94.6748							14.2	3.86616	14.2	4.11076											36.621	89.6788	44.556	89.6439	62.256	97.3236	37.842	74.8764									1448.7	37.6	981.7	27.8107	927.443
					58.594	96.1911	53.711	94.908							14.3	3.95051	14.3	4.18395											37.231	90.6266	45.166	90.2999	62.866	97.3844	38.45	75.0112									1450.71	38	983.82	28.1065	931.3
					59.204	96.2614	54.321	95.1534							14.4	4.02081	14.4	4.24494											37.84	90.6793	45.776	90.956	63.477	97.4453	38.452	75.9101									1473.37	38.4	992.438	28.4024	932.786
					59.814	96.416	54.932	95.4233							14.5	4.11922	14.5	4.28153											37.842	91.1532	46.387	91.3777	64.087	97.7494	39.06	76									1479.95	38.8	992.688	28.6982	947.871
					60.425	96.5566	55.542	95.5828							14.6	4.21763	14.6	4.40351											38.452	91.7852	46.997	91.5651	65.308	97.9319	39.063	77.2135									1483.62	39.2	994.02	28.9941	961.05
					61.035	96.655	56.152	95.7791							14.7	4.27386	14.7	4.5011											39.06	91.8378	47.607	92.0337	65.918	97.9927	39.673	78.1573									1506.82	39.6	997	29.2899	964.757
					61.646	96.8096	56.763	96.0368							14.8	4.3301	14.8	4.54989											39.063	92.1538	47.61	92.0806	66.528	98.0535	40.28	78.2022									1514.96	40	997.5	29.5858	973.433
					62.256	96.922	57.373	96.1595							14.9	4.35822	14.9	4.61088											39.673	92.3644	48.218	92.6429	67.139	98.2968	40.283	79.191									1517.45	40.4	1000.25	29.8817	976.45
					62.866	97.0766	57.983	96.3681							15	4.42851	15	4.75726											40.28	92.4171	48.22	92.6898	67.749	98.4793	40.894	80.1348									1519.04	40.8	1003	30.1775	979.9
					63.477	97.2312	58.594	96.5031							15.1	4.49881	15.1	4.81825											40.283	92.733	48.828	93.0647	68.359	98.6618	41.5	80.1798									1520.09	41.2	1004.62	30.4734	984.357
					64.087	97.3577	59.204	96.7117							15.2	4.58316	15.2	4.84264											40.89	92.8383	49.438	93.5333	69.58	98.7226	41.504	80.7191									1522.53	41.6	1016.8	30.7692	985.457
					64.697	97.3999	59.814	96.8712							15.3	4.61128	15.3	4.87924											40.894	93.3649	50.049	94.0019	70.801	98.9051	42.11	80.764									1525.97	42	1018.22	31.0651	990.7
					65.308	97.4982	60.425	97.0061							15.4	4.69563	15.4	4.96463											41.504	93.6282	50.05	94.0487	71.411	99.0268	42.114	81.573									1527.2	42.4	1025.78	31.3609	1008.1
					65.918	97.6107	61.035	97.1534							15.5	4.8081	15.5	5.06221											42.114	93.9442	50.659	94.6111	72.021	99.0876	42.725	82.4719									1530.09	42.8	1029.05	31.6568	1008.21
					66.528	97.695	61.646	97.2515							15.6	4.92057	15.6	5.18419											42.725	94.2075	51.27	95.314	73.242	99.2092	42.73	82.5618									1544.03	43.2	1031.95	31.9527	1015.24
					67.139	97.7372	62.256	97.3497							15.7	5.01898	15.7	5.29397											43.335	94.6288	51.88	95.5483	73.853	99.2701	43.335	83.3708									1544.34	43.6	1033.79	32.2485	1018.96
					67.749	97.8356	62.866	97.4724							15.8	5.0471	15.8	5.40376											43.34	94.6814	52.49	95.7826	75.073	99.3309	43.34	83.4157									1549.18	44	1035.76	32.5444	1025.17
					68.359	97.9339	63.477	97.5828							15.9	5.08927	15.9	5.46475											43.945	95.1027	53.1	95.8294	75.684	99.3917	43.945	84.0449									1559.05	44.4	1040.47	32.8402	1038.4
					68.97	98.0042	64.087	97.6687							16	5.15957	16	5.50134											44.556	95.3133	53.101	96.0169	76.294	99.4526	44.556	84.6742									1565.45	44.8	1048.42	33.1361	1038.8
					69.58	98.0745	64.697	97.8528							16.1	5.24392	16.1	5.57453											45.166	95.4713	53.711	96.2512	78.735	99.5134	44.56	84.7191									1570.67	45.2	1054.36	33.432	1047.09
					70.19	98.1448	65.308	97.9632							16.2	5.30015	16.2	5.61112											45.776	95.6293	54.321	96.3918	79.346	99.5742	45.166	85.2135									1578.29	45.6	1064.26	33.7278	1051.9
					70.801	98.2431	65.918	98.0613							16.3	5.39857	16.3	5.69651											46.387	95.9452	54.932	96.6261	79.956	99.6959	45.776	85.9326									1585.91	46	1065.34	34.0237	1054.53
					71.411	98.2713	66.528	98.135							16.4	5.46886	16.4	5.7453											46.997	96.3138	55.542	96.7198	81.177	99.7567	46.387	86.6517									1593.25	46.4	1066.16	34.3195	1059.7
					72.021	98.3696	67.139	98.2454							16.5	5.52509	16.5	5.84289											47.607	96.6825	56.152	96.9072	83.008	99.8175	46.39	86.7416									1595.17	46.8	1071.54	34.6154	1071.23
					72.632	98.454	67.749	98.3067							16.6	5.58133	16.6	5.91608											48.828	96.8931	56.763	97.0478	84.839	99.8783	46.997	87.4157									1618.5	47.2	1074.44	34.9112	1075.43
					73.242	98.5383	68.359	98.3804							16.7	5.62351	16.7	5.98927											49.438	97.0511	57.373	97.2352	85.449	99.9392	47.607	88.0899									1627.02	47.6	1075.15	35.2071	1075.65
					73.853	98.5664	68.97	98.454							16.8	5.72192	16.8	6.09905											50.049	97.2091	57.983	97.4695	93.384	100	47.61	88.1348									1629.74	48	1078.35	35.503	1082.37
					74.463	98.6086	69.58	98.5767							16.9	5.77815	16.9	6.22103											50.05	97.2617	58.594	97.5633			48.218	88.6292									1639.77	48.4	1079	35.7988	1082.75
					75.073	98.6788	70.19	98.6626							17	5.83439	17	6.30642											50.659	97.367	59.204	97.7038			48.22	88.6742									1642.6	48.8	1080.85	36.0947	1083.01
					75.684	98.721	70.801	98.7239							17.1	5.87656	17.1	6.3796											50.66	97.4197	59.814	97.8444			48.828	89.1236									1644.24	49.2	1089.81	36.3905	1093.73
					76.294	98.7913	71.411	98.7362							17.2	5.91874	17.2	6.48939											51.27	97.4724	60.425	98.0319			48.83	89.2135									1645.25	49.6	1098.58	36.6864	1095.84
					76.904	98.8335	72.021	98.7975							17.3	6.07339	17.3	6.58697											51.88	97.683	61.035	98.1724			49.438	89.9326									1677.63	50	1106.71	36.9822	1096.37
					77.515	98.8756	72.632	98.8834							17.4	6.11556	17.4	6.62357											52.49	97.8936	61.646	98.4067			50.049	90.2921									1679.22	50.4	1109.4	37.2781	1107.76
					78.125	98.9459	73.242	98.9939							17.5	6.18586	17.5	6.72115											53.101	97.9989	62.866	98.5473			50.05	90.3371									1679.67	50.8	1120.41	37.574	1110.69
					78.735	98.974	73.853	99.0552							17.6	6.24209	17.6	6.76994											53.711	98.1569	63.477	98.6879			50.659	90.7865									1683.91	51.2	1122.93	37.8698	1122.6
					79.956	99.0162	74.463	99.0798							17.7	6.31239	17.7	6.84313											54.321	98.2096	64.087	98.7348			51.27	91.4607									1696.58	51.6	1123.48	38.1657	1127.21
					80.566	99.0583	75.073	99.1166							17.8	6.42486	17.8	6.95292											54.932	98.4202	64.697	98.7816			51.88	91.9551									1738.17	52	1124.66	38.4615	1139.57
					81.177	99.1427	75.684	99.1656							17.9	6.52327	17.9	7.0505											56.152	98.5255	65.308	98.8285			52.49	92.4045									1741.58	52.4	1129.4	38.7574	1140.36
					81.787	99.1989	76.294	99.1902							18	6.6498	18	7.12369											56.763	98.6309	65.918	98.8754			53.101	92.9438									1745.41	52.8	1134.76	39.0533	1152.3
					82.397	99.2691	76.904	99.2025							18.1	6.70603	18.1	7.25787											57.373	98.6835	66.528	98.9222			53.71	92.9888									1751.66	53.2	1144.3	39.3491	1158.11
					83.618	99.2973	77.515	99.2393							18.2	6.73415	18.2	7.33106											57.983	98.7362	67.749	98.9691			53.711	93.3933									1758.33	53.6	1153.32	39.645	1163.2
					84.229	99.3394	78.125	99.2761							18.3	6.80444	18.3	7.37985											58.594	98.8942	67.75	99.0159			54.32	93.4382									1759.57	54	1166.88	39.9408	1171.79
					84.839	99.3535	78.735	99.3374							18.4	6.87474	18.4	7.52623											59.204	98.9995	68.359	99.0628			54.321	93.7978									1771.52	54.4	1169.09	40.2367	1173.55
					85.449	99.3816	79.346	99.3742							18.5	6.97315	18.5	7.59941											59.814	99.0521	68.97	99.1097			54.932	94.2022									1772.48	54.8	1176.69	40.5325	1175.61
					86.06	99.4097	80.566	99.4479							18.7	7.0575	18.6	7.62381											61.646	99.2101	70.19	99.1565			55.542	94.382									1790.41	55.2	1176.95	40.8284	1181.74
					86.67	99.4378	81.177	99.4847							18.8	7.18403	18.7	7.73359											61.65	99.2628	72.021	99.2034			56.15	94.427									1809.41	55.6	1182.67	41.1243	1187.79
					87.28	99.4519	81.787	99.5337							18.9	7.22621	18.8	7.77019											62.256	99.3154	73.242	99.2971			56.152	94.9663									1811.64	56	1182.88	41.4201	1204.54
					87.891	99.494	83.008	99.5583							19	7.26838	18.9	7.83118											62.866	99.3681	73.853	99.4845			56.763	95.191									1817.93	56.4	1183.04	41.716	1205.43
					88.501	99.5221	83.618	99.5951							19.1	7.39491	19	7.89217											63.48	99.4207	74.463	99.5783			57.373	95.5056									1819.71	56.8	1187.55	42.0118	1213.29
					89.111	99.5643	84.229	99.6074							19.2	7.45115	19.1	7.96536											64.087	99.4734	75.684	99.6251			57.98	95.5506									1834.48	57.2	1189.34	42.3077	1215.04
					89.722	99.6065	84.839	99.6196							19.3	7.56362	19.2	8.01415											64.7	99.5261	81.787	99.7188			57.983	96.0449									1834.86	57.6	1190.92	42.6036	1223.12
					90.332	99.6205	85.449	99.6319							19.4	7.64797	19.3	8.12393											65.308	99.5787	82.397	99.7657			58.594	96.3596									1836.94	58	1195.38	42.8994	1223.97
					90.942	99.6346	86.06	99.681							19.5	7.76044	19.4	8.22152											65.92	99.6314	83.618	99.8126			59.204	96.764									1840.53	58.4	1199.3	43.1953	1229.79
					91.553	99.6486	87.28	99.6933							19.6	7.81667	19.5	8.3313											66.528	99.7367	97.656	99.8594			59.814	96.9438									1844.04	58.8	1202.92	43.4911	1233.5
					92.163	99.6627	87.891	99.7178							19.7	7.87291	19.6	8.40449											67.139	99.7894	98.267	99.9063			60.425	97.0337									1859.87	59.2	1203.28	43.787	1237.85
					92.773	99.733	89.111	99.7301							19.8	7.95726	19.7	8.45328											67.749	99.842	98.877	99.9531			61.035	97.3034									1883.79	59.6	1205.72	44.0828	1243.93
					93.384	99.747	90.332	99.7423							19.9	8.04161	19.8	8.55087											69.58	99.8947	135.498	100			61.04	97.3933									1886.36	60	1206.56	44.3787	1247.19
					93.994	99.7751	90.942	99.7669							20	8.14003	19.9	8.56306											72.632	99.9473					61.646	97.6629									1899.17	60.4	1211.26	44.6746	1253.63
					94.604	99.7892	92.163	99.7791							20.1	8.21032	20	8.63625											73.24	100					62.256	97.7079									1900.45	60.8	1214.06	44.9704	1254.34
					95.215	99.8032	93.384	99.8037							20.2	8.29467	20.1	8.72164																	62.866	97.7978									1923.83	61.2	1215.22	45.2663	1260.5
					96.436	99.8173	93.994	99.8405							20.3	8.40714	20.2	8.74604																	63.477	97.8427									1926.8	61.6	1215.7	45.5621	1261.57
					97.656	99.8313	94.604	99.8528							20.4	8.43526	20.3	8.84362																	64.087	98.3371									1928.18	62	1218.04	45.858	1262.56
					98.267	99.8454	96.436	99.8773							20.5	8.50555	20.4	8.94121																	64.697	98.6067									1931.89	62.4	1224.3	46.1538	1272.37
					98.877	99.8735	97.046	99.9018							20.6	8.57585	20.5	9.03879																	65.308	98.7865									1940.07	62.8	1233.23	46.4497	1283.67
					99.487	99.8876	97.656	99.9141							20.7	8.74455	20.6	9.09978																	65.918	98.9213									1942.98	63.2	1236.32	46.7456	1308.6
					101.929	99.9016	99.487	99.9264							20.8	8.77267	20.7	9.22176																	66.53	98.9663									1953.53	63.6	1236.4	47.0414	1319.61
					102.539	99.9157	100.098	99.9387							20.9	8.80079	20.8	9.34374																	67.749	99.1011									1963.28	64	1242.83	47.3373	1319.7
					104.981	99.9297	101.929	99.9509							21	8.92732	20.9	9.44133																	68.359	99.1461									1970.78	64.4	1242.91	47.6331	1337.06
					106.812	99.9438	106.812	99.9632							21.1	8.99761	21	9.55111																	69.58	99.191									1973.94	64.8	1245.89	47.929	1340.51
					107.422	99.9578	117.188	99.9755							21.2	9.05385	21.1	9.6121																	70.19	99.2809									1989.15	65.2	1246.62	48.2249	1342.5
					109.253	99.9719	120.85	99.9877							21.3	9.09602	21.2	9.72188																	70.801	99.4157									1999.5	65.6	1246.64	48.5207	1343.41
					112.915	99.9859	123.901	100							21.4	9.16632	21.3	9.81947																	71.411	99.5056									2002.03	66	1251.24	48.8166	1346.2
					128.174	100									21.5	9.22255	21.4	9.83167																	72.021	99.5506									2019.58	66.4	1257.18	49.1124	1348.99
															21.6	9.29284	21.5	9.86826																	73.242	99.6404									2020.17	66.8	1261.48	49.4083	1349.83
															21.7	9.36314	21.6	9.95365																	74.463	99.6854									2039.04	67.2	1263	49.7041	1350.73
															21.8	9.50373	21.7	10.1																	75.684	99.7303									2040.2	67.6	1263.87	50	1356.8
															21.9	9.6162	21.8	10.2464																	78.735	99.7753									2050.74	68	1270.54	50.2959	1363.81
															22	9.68649	21.9	10.3318																	79.346	99.8202									2057.05	68.4	1272.9	50.5917	1365.7
															22.1	9.7849	22	10.4416																	82.397	99.8652									2078.94	68.8	1283.86	50.8876	1369.4
															22.2	9.85519	22.1	10.5026																	83.618	99.9101									2083.85	69.2	1288.26	51.1834	1370.51
															22.3	9.93955	22.2	10.5879																	87.891	99.9551									2092.83	69.6	1289.26	51.4793	1373.65
															22.4	9.98172	22.3	10.7343																	92.163	100									2098.55	70	1294.26	51.7751	1382.1
															22.5	10.0801	22.4	10.7953																											2109.66	70.4	1296.46	52.071	1384.3
															22.7	10.2067	22.5	10.8441																											2110.63	70.8	1307.55	52.3669	1406.26
															22.8	10.277	22.6	10.9051																											2130.41	71.2	1308.74	52.6627	1409.5
															22.9	10.3613	22.7	10.9417																											2139.65	71.6	1321.83	52.9586	1425.41
															23	10.4457	22.8	10.9783																											2149.36	72	1329.37	53.2544	1426.47
															23.1	10.53	22.9	11.0759																											2166.06	72.4	1338.04	53.5503	1427.57
															23.2	10.5863	23	11.1857																											2174.6	72.8	1340.19	53.8462	1428.7
															23.3	10.7268	23.1	11.3076																											2175.37	73.2	1341.67	54.142	1432.63
															23.4	10.8393	23.2	11.3808																											2182.48	73.6	1358.62	54.4379	1438.69
															23.5	10.9377	23.3	11.4174																											2187.73	74	1367.04	54.7337	1441.84
															23.6	10.994	23.4	11.515																											2199.01	74.4	1368.21	55.0296	1453.81
															23.7	11.0221	23.5	11.576																											2203.68	74.8	1370.3	55.3254	1456.21
															23.8	11.1205	23.6	11.6248																											2207.87	75.2	1370.5	55.6213	1468.35
															23.9	11.2189	23.7	11.7468																											2229.11	75.6	1382.5	55.9172	1477.36
															24	11.3032	23.8	11.8566																											2252.86	76	1386.49	56.213	1482.76
															24.1	11.3595	23.9	11.9663																											2253.04	76.4	1388.43	56.5089	1490.55
															24.2	11.4157	24	12.0517																											2296.96	76.8	1396.15	56.8047	1492.57
															24.3	11.5141	24.1	12.1371																											2298.85	77.2	1415.93	57.1006	1496.09
															24.4	11.5844	24.2	12.2103																											2314.1	77.6	1419.03	57.3964	1507.47
															24.5	11.6688	24.3	12.2713																											2314.66	78	1420.1	57.6923	1513.66
															24.6	11.6828	24.4	12.3323																											2329.81	78.4	1424.39	57.9882	1518.06
															24.7	11.7672	24.5	12.3933																											2381.59	78.8	1431.39	58.284	1523.36
															24.8	11.8375	24.6	12.4665																											2396.7	79.2	1432.86	58.5799	1527.09
															24.9	11.9359	24.7	12.5396																											2419.23	79.6	1435.49	58.8757	1528.1
															25	11.964	24.8	12.6006																											2435.7	80	1439.88	59.1716	1530.27
															25.1	12.1046	24.9	12.6616																											2447.64	80.4	1442.5	59.4675	1544.09
															25.2	12.1608	25	12.7836																											2459.81	80.8	1445.18	59.7633	1550.63
															25.3	12.2592	25.1	12.8324																											2466.61	81.2	1446.47	60.0592	1553.8
															25.4	12.3295	25.2	12.8812																											2504.92	81.6	1446.86	60.355	1558.8
															25.5	12.4139	25.3	12.991																											2544.8	82	1448.95	60.6509	1567.37
															25.6	12.4842	25.4	13.1008																											2627.64	82.4	1451.68	60.9467	1573.67
															25.7	12.5545	25.5	13.1861																											2649.62	82.8	1452.78	61.2426	1592.83
															25.8	12.6529	25.6	13.2593																											2660.59	83.2	1466.9	61.5385	1595.47
															25.9	12.7513	25.7	13.3691																											2683.03	83.6	1483.56	61.8343	1632.85
															26	12.8497	25.8	13.4057																											2701.99	84	1487.44	62.1302	1638.93
															26.1	12.9481	25.9	13.5033																											2713.69	84.4	1505.9	62.426	1647.5
															26.2	13.1168	26	13.5887																											2728.61	84.8	1507.3	62.7219	1647.69
															26.3	13.1871	26.1	13.6497																											2729.66	85.2	1531.1	63.0178	1649.8
															26.4	13.2152	26.2	13.7717																											2737.75	85.6	1534.7	63.3136	1664.6
															26.5	13.2996	26.3	13.796																											2745.69	86	1538.96	63.6095	1666.05
															26.6	13.3558	26.4	13.8448																											2762.47	86.4	1556.12	63.9053	1671.4
															26.7	13.4261	26.5	13.9058																											2767.65	86.8	1558.06	64.2012	1680.78
															26.8	13.4964	26.6	13.979																											2780.66	87.2	1566.53	64.497	1683.66
															26.9	13.5527	26.7	14.0522																											2788.98	87.6	1570.87	64.7929	1686.03
															27	13.5948	26.8	14.1132																											2793.56	88	1575.87	65.0888	1692.41
															27.1	13.7354	26.9	14.1864																											2816.69	88.4	1578.72	65.3846	1694.51
															27.2	13.8057	27	14.1986																											2822.32	88.8	1579.11	65.6805	1703.03
															27.3	13.876	27.1	14.3084																											2823.8	89.2	1590.4	65.9763	1706.99
															27.4	13.9885	27.2	14.4182																											2844.16	89.6	1592.16	66.2722	1711.94
															27.5	14.0728	27.3	14.5035																											2853.53	90	1593.06	66.568	1716.05
															27.6	14.2134	27.4	14.5523																											2858.22	90.4	1597.05	66.8639	1726.43
															27.7	14.3118	27.5	14.6255																											2895.23	90.8	1597.28	67.1598	1727.16
															27.8	14.3681	27.6	14.6621																											3009.03	91.2	1607.79	67.4556	1728.7
															27.9	14.4243	27.7	14.7353																											3032.72	91.6	1611.6	67.7515	1732
															28	14.4384	27.8	14.7719																											3104.97	92	1618.12	68.0473	1735.47
															28.1	14.5227	27.9	14.8329																											3106.08	92.4	1628.08	68.3432	1738.2
															28.2	14.593	28	14.8695																											3108.12	92.8	1636.39	68.6391	1757.84
															28.3	14.7055	28.1	14.9183																											3113.6	93.2	1640.53	68.9349	1761.19
															28.4	14.7898	28.2	15.0159																											3155.39	93.6	1644.15	69.2308	1765.81
															28.5	14.8461	28.3	15.089																											3244.41	94	1647.84	69.5266	1767.93
															28.6	14.8882	28.4	15.1988																											3332.7	94.4	1648.78	69.8225	1775.56
															28.7	15.0007	28.5	15.272																											3354.98	94.8	1652.3	70.1183	1780.64
															28.8	15.0429	28.6	15.3696																											3364.36	95.2	1661.42	70.4142	1781.15
															28.9	15.1132	28.7	15.4672																											3392.45	95.6	1665.89	70.7101	1782.64
															29	15.1553	28.8	15.4916																											3421	96	1671.04	71.0059	1789.5
															29.1	15.2538	28.9	15.5648																											3603.25	96.4	1678.14	71.3018	1801.64
															29.2	15.3522	29	15.6502																											3662.27	96.8	1680.38	71.5976	1802.67
															29.3	15.4225	29.1	15.6868																											3678.6	97.2	1680.91	71.8935	1807.44
															29.4	15.5349	29.2	15.8087																											3848.9	97.6	1685.27	72.1893	1807.7
															29.5	15.6333	29.3	15.8819																											3855.18	98	1691.16	72.4852	1820.45
															29.6	15.6755	29.4	15.9551																											3926.98	98.4	1693.68	72.7811	1825.15
															29.7	15.7458	29.5	16.0039																											4001.45	98.8	1715.14	73.0769	1830.65
															29.8	15.8442	29.6	16.0527																											4119.49	99.2	1716.59	73.3728	1841.4
															29.9	15.9286	29.7	16.1137																											5349.7	99.6	1716.6	73.6686	1842.23
															30	16.0411	29.8	16.1869																											6026.1	100	1725.18	73.9645	1845.8
															30.1	16.0973	29.9	16.2723																													1727.17	74.2604	1854.84
															30.2	16.1816	30	16.3455																													1743.76	74.5562	1877.21
															30.3	16.266	30.1	16.4186																													1751.31	74.8521	1886.37
															30.4	16.3503	30.2	16.4552																													1756.11	75.1479	1886.86
															30.5	16.4206	30.3	16.5284																													1761.08	75.4438	1896.85
															30.6	16.5331	30.4	16.5528																													1763.54	75.7396	1911.35
															30.7	16.6034	30.5	16.6138																													1768.94	76.0355	1915.2
															30.8	16.6315	30.6	16.6626																													1772.32	76.3314	1934.09
															30.9	16.7159	30.7	16.7236																													1782.78	76.6272	1947.5
															31	16.744	30.8	16.7724																													1785.46	76.9231	1960.03
															31.1	16.8283	30.9	16.8212																													1796.54	77.2189	1967.6
															31.2	16.8705	31	16.9066																													1831.99	77.5148	1979.66
															31.3	16.9268	31.1	17.1139																													1838.76	77.8107	1984.65
															31.4	17.0673	31.2	17.1749																													1839.5	78.1065	1988.75
															31.5	17.1658	31.3	17.2359																													1845.16	78.4024	2000.66
															31.6	17.2079	31.4	17.2969																													1845.64	78.6982	2012.2
															31.7	17.2782	31.5	17.3213																													1847.56	78.9941	2015.77
															31.8	17.3485	31.6	17.3823																													1862.3	79.2899	2019.73
															31.9	17.4469	31.7	17.4677																													1866.9	79.5858	2021.7
															32	17.5453	31.8	17.5775																													1881.98	79.8817	2032.07
															32.1	17.6016	31.9	17.7238																													1892.19	80.1775	2060.07
															32.2	17.6578	32	17.7604																													1896.1	80.4734	2065.27
															32.3	17.7281	32.1	17.797																													1918.1	80.7692	2065.86
															32.4	17.7843	32.2	17.8336																													1919.19	81.0651	2069.95
															32.5	17.8546	32.3	17.8824																													1926.58	81.3609	2073.55
															32.6	17.9249	32.4	17.9678																													1929.36	81.6568	2078.15
															32.7	17.9812	32.5	18.0654																													1930.07	81.9527	2085.85
															32.8	18.0796	32.6	18.1386																													1939.28	82.2485	2086
															32.9	18.1077	32.7	18.2362																													1944.04	82.5444	2094.56
															33	18.192	32.8	18.2849																													2001.9	82.8402	2101.04
															33.1	18.2905	32.9	18.3703																													2002.68	83.1361	2108.65
															33.2	18.3326	33	18.4923																													2018.53	83.432	2114.5
															33.3	18.3607	33.1	18.5655																													2030.36	83.7278	2128.9
															33.4	18.417	33.2	18.5899																													2032.11	84.0237	2132.8
															33.5	18.4873	33.3	18.6509																													2056.71	84.3195	2141.8
															33.6	18.5716	33.4	18.7851																													2058.77	84.6154	2153.39
															33.7	18.6279	33.5	18.9071																													2070.8	84.9112	2172.05
															33.8	18.67	33.6	18.9802																													2085.22	85.2071	2174.1
															33.9	18.7263	33.7	19.0168																													2123.47	85.503	2185.5
															34	18.8247	33.8	19.0778																													2127.19	85.7988	2192.1
															34.1	18.9231	33.9	19.1144																													2149.6	86.0947	2203.83
															34.2	19.0637	34	19.1876																													2171.28	86.3905	2214.1
															34.3	19.148	34.1	19.2974																													2180.8	86.6864	2260.76
															34.4	19.1762	34.2	19.3828																													2227.22	86.9822	2339.83
															34.5	19.2183	34.3	19.4804																													2262.4	87.2781	2371.55
															34.6	19.3027	34.4	19.5657																													2265.38	87.574	2372.14
															34.7	19.3589	34.5	19.6633																													2311.38	87.8698	2383.56
															34.8	19.4714	34.6	19.7365																													2315.13	88.1657	2390.9
															34.9	19.5557	34.7	19.7853																													2316.01	88.4615	2407.2
															35	19.612	34.8	19.8219																													2347.26	88.7574	2429.07
															35.1	19.6542	34.9	19.9317																													2357.3	89.0533	2447.5
															35.2	19.6682	35	20.0049																													2382.15	89.3491	2455.7
															35.3	19.7666	35.1	20.1025																													2406.98	89.645	2477.13
															35.4	19.865	35.2	20.2																													2455.98	89.9408	2507.93
															35.5	19.9494	35.3	20.261																													2462.03	90.2367	2520.1
															35.6	20.0197	35.4	20.322																													2464.87	90.5325	2560.75
															35.7	20.09	35.5	20.383																													2488.52	90.8284	2608.8
															35.8	20.1322	35.6	20.444																													2497.24	91.1243	2658.47
															35.9	20.2024	35.7	20.5172																													2517.46	91.4201	2681.95
															36	20.2446	35.8	20.5782																													2539.1	91.716	2701
															36.1	20.3149	35.9	20.6758																													2599.3	92.0118	2778.35
															36.2	20.3993	36	20.7978																													2599.51	92.3077	2781.03
															36.3	20.4133	36.1	20.8831																													2600.94	92.6036	2781.34
															36.4	20.4414	36.2	21.0051																													2601	92.8994	2825.65
															36.5	20.5258	36.3	21.0905																													2601.35	93.1953	2848.54
															36.6	20.568	36.4	21.1393																													2682.2	93.4911	2883.91
															36.7	20.6383	36.5	21.1759																													2689.72	93.787	2960.25
															36.8	20.6945	36.6	21.2247																													2716.36	94.0828	3313.2
															36.9	20.7507	36.7	21.2735																													2744.29	94.3787	3376.63
															37.1	20.7929	36.8	21.2979																													2760.57	94.6746	3534.55
															37.2	20.8351	36.9	21.3955																													2779	94.9704	3557.7
															37.3	20.9054	37	21.4808																													2820.96	95.2663	3644.7
															37.4	21.0038	37.1	21.493																													2833.54	95.5621	3728.8
															37.5	21.06	37.2	21.5296																													2834.41	95.858	3885.05
															37.6	21.1022	37.3	21.6028																													2904.4	96.1538	3929.25
															37.7	21.1444	37.4	21.6638																													2914.33	96.4497	4128.6
															37.8	21.2287	37.5	21.737																													2942.6	96.7456	4261.8
															37.9	21.2709	37.6	21.859																													2993.83	97.0414	4732.35
															38	21.3693	37.7	21.92																													3053.06	97.3373	4879
															38.1	21.4396	37.8	22.0054																													3118.14	97.6331	4967.01
															38.2	21.4959	37.9	22.0542																													3264.47	97.929
															38.3	21.5802	38	22.1395																													3317.95	98.2249
															38.4	21.6646	38.1	22.1883																													3376.64	98.5207
															38.5	21.7208	38.2	22.3225																													3390.19	98.8166
															38.6	21.8192	38.3	22.4079																													3546	99.1124
															38.7	21.9317	38.4	22.4811																													3707.86	99.4083
															38.8	22.0723	38.5	22.6031																													4015.06	99.7041
															38.9	22.1426	38.6	22.6763																													5394.7	100
															39	22.1847	38.7	22.7738
															39.1	22.2831	38.8	22.8348
															39.2	22.2972	38.9	22.8836
															39.3	22.3956	39	22.9568
															39.4	22.494	39.1	23.0056
															39.5	22.5643	39.2	23.1032
															39.6	22.6206	39.3	23.1886
															39.7	22.7049	39.4	23.2862
															39.8	22.7752	39.5	23.3472
															39.9	22.8596	39.6	23.4081
															40	22.8877	39.7	23.4447
															40.1	22.958	39.8	23.4813
															40.2	23.0283	39.9	23.5789
															40.3	23.0845	40	23.6277
															40.5	23.1267	40.1	23.7131
															40.6	23.1829	40.2	23.7741
															40.7	23.2532	40.3	23.8351
															40.8	23.3235	40.4	23.9205
															40.9	23.4078	40.5	23.9571
															41	23.45	40.6	23.9937
															41.1	23.5203	40.7	24.0912
															41.2	23.5765	40.8	24.1522
															41.3	23.675	40.9	24.2254
															41.4	23.7734	41	24.2498
															41.5	23.8999	41.1	24.2986
															41.6	23.9702	41.2	24.323
															41.7	24.0405	41.3	24.3596
															41.8	24.0967	41.4	24.4694
															41.9	24.153	41.5	24.5548
															42	24.2092	41.6	24.6524
															42.1	24.2514	41.7	24.7133
															42.2	24.2795	41.8	24.7255
															42.3	24.3357	41.9	24.7743
															42.4	24.392	42	24.8475
															42.5	24.4482	42.1	24.8841
															42.6	24.5044	42.2	24.9451
															42.7	24.5466	42.3	25.0427
															42.8	24.631	42.4	25.1159
															42.9	24.6591	42.5	25.1769
															43	24.7013	42.6	25.2867
															43.1	24.8418	42.7	25.3598
															43.2	24.9121	42.8	25.3842
															43.3	24.9824	42.9	25.4574
															43.4	25.0668	43	25.5428
															43.5	25.109	43.1	25.5916
															43.6	25.2214	43.2	25.6892
															43.7	25.3339	43.3	25.7746
															43.8	25.3761	43.4	25.86
															43.9	25.4604	43.5	25.9819
															44	25.5167	43.6	26.0917
															44.1	25.5588	43.7	26.1771
															44.2	25.5729	43.8	26.2259
															44.3	25.601	43.9	26.3113
															44.4	25.6151	44	26.3845
															44.5	25.6994	44.1	26.5309
															44.6	25.7557	44.2	26.6162
															44.7	25.826	44.3	26.7016
															44.8	25.8681	44.4	26.7626
															44.9	25.8822	44.5	26.8724
															45	25.9244	44.6	26.9456
															45.1	25.9947	44.7	27.0066
															45.2	26.0228	44.8	27.0432
															45.3	26.0368	44.9	27.0798
															45.4	26.1212	45	27.1164
															45.5	26.2055	45.1	27.153
															45.6	26.318	45.2	27.1774
															45.7	26.4305	45.3	27.2871
															45.8	26.5148	45.4	27.3603
															45.9	26.5711	45.5	27.3969
															46	26.6273	45.6	27.5677
															46.1	26.7117	45.7	27.6287
															46.2	26.7819	45.8	27.6653
															46.3	26.8241	45.9	27.7263
															46.4	26.8944	46	27.8605
															46.5	26.9366	46.1	27.958
															46.6	27.0069	46.2	28.0312
															46.7	27.0912	46.3	28.0678
															46.8	27.1475	46.4	28.1288
															46.9	27.2178	46.5	28.1654
															47	27.2459	46.6	28.2386
															47.1	27.3584	46.7	28.3118
															47.2	27.4568	46.8	28.3972
															47.3	27.5411	46.9	28.4704
															47.4	27.5974	47	28.5557
															47.5	27.6536	47.1	28.5923
															47.6	27.6817	47.2	28.6533
															47.7	27.7661	47.3	28.7265
															47.8	27.7942	47.4	28.7875
															47.9	27.8504	47.5	28.8729
															48	27.9066	47.6	28.9461
															48.1	27.9488	47.7	28.9949
															48.2	28.0051	47.8	29.0193
															48.3	28.0894	47.9	29.0315
															48.4	28.1316	48	29.1047
															48.5	28.1597	48.1	29.1413
															48.6	28.2019	48.2	29.1657
															48.7	28.2441	48.3	29.2022
															48.8	28.2862	48.4	29.251
															48.9	28.3284	48.5	29.2754
															49	28.4268	48.6	29.3242
															49.1	28.4549	48.7	29.373
															49.2	28.5252	48.8	29.434
															49.3	28.5674	48.9	29.495
															49.4	28.6236	49	29.5682
															49.5	28.6939	49.1	29.6414
															49.6	28.708	49.2	29.6658
															49.7	28.7642	49.3	29.7512
															49.8	28.8064	49.4	29.7878
															49.9	28.8626	49.5	29.8609
															50	28.9048	49.6	29.9707
															50.1	28.947	49.7	30.0073
															50.2	28.9611	49.8	30.1171
															50.3	28.9892	49.9	30.1659
															50.4	29.0314	50	30.2025
															50.5	29.0735	50.1	30.3001
															50.6	29.0876	50.2	30.4099
															50.7	29.1579	50.3	30.544
															50.8	29.2001	50.4	30.5928
															50.9	29.2985	50.5	30.6904
															51	29.3688	50.6	30.7392
															51.1	29.4391	50.7	30.8246
															51.2	29.5093	50.8	30.8612
															51.3	29.5656	50.9	30.8978
															51.4	29.5796	51	30.9222
															51.5	29.7483	51.1	30.971
															51.6	29.8046	51.2	31.032
															51.7	29.8608	51.3	31.0929
															51.8	29.903	51.4	31.1661
															51.9	29.9592	51.5	31.2881
															52	30.0014	51.6	31.3369
															52.1	30.0295	51.7	31.3979
															52.2	30.0998	51.8	31.4101
															52.3	30.1701	51.9	31.4833
															52.4	30.2263	52	31.5565
															52.5	30.2826	52.1	31.5809
															52.6	30.3529	52.2	31.6175
															52.7	30.4091	52.3	31.7394
															52.8	30.4513	52.4	31.776
															52.9	30.5216	52.5	31.8492
															53	30.5497	52.6	31.8858
															53.1	30.6059	52.7	31.959
															53.2	30.62	52.8	32.02
															53.3	30.6341	52.9	32.0932
															53.4	30.7184	53	32.1542
															53.5	30.8309	53.1	32.2396
															53.6	30.8449	53.2	32.325
															53.7	30.9152	53.3	32.3981
															53.8	30.9293	53.4	32.4591
															53.9	30.9996	53.5	32.4835
															54	31.0418	53.6	32.5933
															54.1	31.0699	53.7	32.6299
															54.2	31.098	53.8	32.6543
															54.3	31.1402	53.9	32.7031
															54.4	31.2105	54	32.7397
															54.5	31.3089	54.1	32.7885
															54.6	31.3651	54.2	32.8617
															54.7	31.4354	54.3	32.8861
															54.8	31.4916	54.4	32.9593
															54.9	31.5479	54.5	32.9959
															55	31.6182	54.6	33.0324
															55.1	31.6322	54.7	33.0934
															55.2	31.6885	54.8	33.1666
															55.3	31.7728	54.9	33.252
															55.4	31.8572	55	33.3008
															55.5	31.8993	55.1	33.3496
															55.6	31.9556	55.2	33.4228
															55.7	32.0259	55.3	33.4716
															55.8	32.0399	55.4	33.5204
															55.9	32.068	55.5	33.6058
															56	32.0962	55.6	33.6424
															56.1	32.1243	55.7	33.6911
															56.2	32.1946	55.8	33.7399
															56.3	32.2649	55.9	33.7765
															56.4	32.307	56	33.8375
															56.5	32.3492	56.1	33.8985
															56.6	32.4336	56.2	33.9595
															56.7	32.5179	56.3	34.0327
															56.8	32.546	56.4	34.1059
															56.9	32.6023	56.5	34.2035
															57	32.6585	56.6	34.3132
															57.1	32.7007	56.7	34.3864
															57.2	32.785	56.8	34.4352
															57.3	32.8413	56.9	34.5084
															57.4	32.9537	57	34.5694
															57.5	32.9678	57.1	34.5938
															57.6	32.9959	57.2	34.606
															57.7	33.0381	57.3	34.667
															57.8	33.0662	57.4	34.7036
															57.9	33.1646	57.5	34.7646
															58	33.2209	57.6	34.8134
															58.1	33.249	57.7	34.8622
															58.2	33.263	57.8	34.8988
															58.3	33.3193	57.9	34.9597
															58.4	33.3615	58	35.0329
															58.5	33.4036	58.1	35.0817
															58.6	33.4599	58.2	35.1671
															58.7	33.488	58.3	35.2159
															58.8	33.5302	58.4	35.2403
															58.9	33.5583	58.5	35.2891
															59	33.6567	58.6	35.3623
															59.1	33.6989	58.7	35.4111
															59.2	33.7692	58.8	35.4721
															59.3	33.7973	58.9	35.5209
															59.4	33.8535	59	35.594
															59.5	33.9379	59.1	35.6306
															59.6	33.966	59.2	35.655
															59.7	33.9941	59.3	35.716
															59.8	34.0222	59.4	35.777
															59.9	34.1066	59.5	35.8136
															60	34.1206	59.6	35.838
															60.1	34.1769	59.7	35.9356
															60.2	34.219	59.8	35.9966
															60.3	34.2753	59.9	36.0332
															60.4	34.3456	60	36.1186
															60.5	34.4018	60.1	36.1552
															60.6	34.5143	60.2	36.1918
															60.7	34.5846	60.3	36.2405
															60.8	34.6549	60.4	36.2649
															60.9	34.6689	60.5	36.3137
															61	34.697	60.6	36.4235
															61.1	34.7954	60.7	36.4845
															61.2	34.8376	60.8	36.5699
															61.3	34.922	60.9	36.6187
															61.4	34.9501	61	36.6919
															61.5	35.0485	61.1	36.7529
															61.6	35.0766	61.2	36.8139
															61.7	35.1188	61.3	36.9114
															61.8	35.161	61.4	36.9724
															61.9	35.2031	61.5	37.0212
															62	35.2313	61.6	37.07
															62.1	35.2453	61.7	37.131
															62.3	35.3578	61.8	37.192
															62.5	35.414	61.9	37.2652
															62.6	35.4703	62	37.4238
															62.7	35.4843	62.1	37.436
															62.8	35.5265	62.2	37.4848
															62.9	35.5546	62.3	37.5579
															63	35.5968	62.4	37.6189
															63.1	35.6109	62.5	37.6555
															63.2	35.639	62.6	37.6799
															63.3	35.7093	62.7	37.7653
															63.4	35.7655	62.8	37.8141
															63.5	35.8077	62.9	37.8507
															63.6	35.8499	63	37.8995
															63.7	35.892	63.1	37.9483
															63.8	35.9483	63.2	38.0215
															63.9	35.9904	63.3	38.0947
															64	36.0326	63.4	38.1434
															64.1	36.0748	63.5	38.1678
															64.2	36.117	63.6	38.18
															64.3	36.1591	63.7	38.2166
															64.4	36.1732	63.8	38.2532
															64.5	36.2154	63.9	38.302
															64.6	36.2997	64	38.3874
															64.7	36.4122	64.1	38.4606
															64.8	36.4403	64.2	38.5338
															64.9	36.4825	64.3	38.5948
															65	36.5668	64.4	38.6802
															65.2	36.595	64.5	38.7412
															65.3	36.6793	64.6	38.7534
															65.4	36.7356	64.7	38.7899
															65.5	36.7637	64.8	38.8387
															65.6	36.8199	64.9	38.8753
															65.7	36.848	65	38.9119
															65.8	36.8902	65.1	38.9607
															65.9	36.9464	65.2	39.0339
															66	36.9886	65.3	39.0705
															66.1	37.0167	65.4	39.1193
															66.2	37.0448	65.5	39.1559
															66.3	37.1292	65.6	39.1803
															66.4	37.2136	65.7	39.2535
															66.5	37.2698	65.8	39.2901
															66.6	37.326	65.9	39.3145
															66.7	37.4385	66	39.3633
															66.8	37.5088	66.1	39.4121
															66.9	37.551	66.2	39.4608
															67	37.5931	66.3	39.4974
															67.1	37.6775	66.4	39.5584
															67.2	37.7197	66.5	39.6438
															67.3	37.79	66.6	39.7292
															67.4	37.8181	66.7	39.7902
															67.5	37.8884	66.8	39.8268
															67.6	37.9165	66.9	39.8634
															67.7	37.9587	67	39.9
															67.8	38.0571	67.1	39.9488
															67.9	38.0993	67.2	40.022
															68	38.1133	67.3	40.0829
															68.1	38.1414	67.4	40.1439
															68.3	38.2117	67.7	40.1683
															68.4	38.2539	67.8	40.2415
															68.5	38.2961	67.9	40.3147
															68.6	38.3383	68	40.3635
															68.7	38.3523	68.1	40.3879
															68.8	38.3804	68.2	40.4367
															68.9	38.4367	68.3	40.4977
															69	38.4788	68.4	40.5465
															69.1	38.521	68.5	40.6075
															69.2	38.5632	68.6	40.6563
															69.3	38.6054	68.7	40.6807
															69.4	38.6194	68.8	40.7294
															69.5	38.6757	68.9	40.8026
															69.5894	38.6897	69	40.8392
															69.6	38.8022	69.1	40.9124
															69.7	38.8444	69.2	40.9368
															69.8	38.9147	69.3	41.0222
															69.9	38.9428	69.4	41.0832
															70	38.9709	69.5	41.1442
															70.1	39.0412	69.6	41.193
															70.2	39.0974	69.7	41.254
															70.3	39.1677	69.8	41.2906
															70.4	39.224	69.9	41.3272
															70.5	39.2661	70	41.3394
															70.6	39.3083	70.1	41.3881
															70.7	39.3505	70.2	41.4491
															70.8	39.3927	70.3	41.5101
															71	39.4348	70.4	41.5589
															71.1	39.477	70.5	41.5955
															71.2	39.5192	70.6	41.6199
															71.3	39.5754	70.7	41.6687
															71.4	39.6176	70.8	41.7175
															71.5	39.7441	70.9	41.7785
															71.6	39.8425	71	41.8395
															71.7	39.8988	71.1	41.9005
															71.8	39.955	71.2	41.9127
															72.1	39.9972	71.3	41.9859
															72.2	40.0253	71.4	42.059
															72.3	40.0534	71.5	42.0712
															72.4	40.1237	71.6	42.1078
															72.5	40.1659	71.7	42.1688
															72.6	40.2081	71.8	42.2664
															72.7	40.2362	71.9	42.2908
															72.8	40.2784	72	42.303
															72.9	40.3487	72.1	42.3518
															73	40.433	72.2	42.364
															73.1	40.4752	72.3	42.425
															73.3	40.5174	72.4	42.4616
															73.4	40.5455	72.5	42.5104
															73.5	40.5595	72.6	42.5348
															73.6	40.5877	72.7	42.5714
															73.7	40.6017	72.8	42.5958
															73.9	40.6158	72.9	42.6445
															74	40.658	73	42.7299
															74.1	40.672	73.1	42.7909
															74.2	40.7564	73.2	42.8153
															74.3	40.8126	73.3	42.8763
															74.3679	40.8267	73.4	42.9129
															74.4	40.8407	73.5	42.9373
															74.5	40.8688	73.6	42.9739
															74.6	40.911	73.7	43.0349
															74.7	40.9532	73.8	43.0715
															74.8	40.9813	73.9	43.1691
															74.9	41.0375	74	43.2179
															75	41.0657	74.1	43.3154
															75.1	41.1641	74.2	43.3642
															75.2	41.1922	74.3	43.4008
															75.3	41.2062	74.4	43.4496
															75.4	41.2203	74.5	43.4862
															75.5	41.2625	74.6	43.5228
															75.6	41.3047	74.7	43.596
															75.7	41.3187	74.8	43.6448
															75.8	41.3468	74.9	43.657
															75.9	41.3749	75	43.6692
															76	41.4452	75.1	43.6936
															76.2	41.4874	75.2	43.7546
															76.3	41.5858	75.3	43.7668
															76.4	41.628	75.4	43.779
															76.5	41.6421	75.5	43.9253
															76.6	41.6983	75.6	43.9619
															76.7	41.7124	75.7	43.9741
															76.8	41.7264	75.8	44.0107
															76.9	41.7827	75.9	44.0717
															77	41.8248	76	44.0961
															77.1	41.8389	76.1	44.1205
															77.2	41.9373	76.2	44.1571
															77.4	41.9654	76.3	44.1937
															77.5	42.0498	76.4	44.2425
															77.6	42.106	76.5	44.3157
															77.7	42.1763	76.6	44.4133
															77.8	42.2044	76.7	44.4865
															77.9	42.2466	76.8	44.5718
															78	42.3028	76.9	44.5962
															78.1	42.4012	77	44.7304
															78.2	42.4434	77.1	44.7548
															78.3	42.4996	77.2	44.7792
															78.4	42.5278	77.3	44.8402
															78.5	42.5559	77.4	44.8646
															78.6	42.6262	77.5	44.8768
															78.7	42.6965	77.6	44.95
															78.8	42.7246	77.7	44.9622
															78.9	42.7386	77.8	44.9866
															79	42.7668	77.9	44.9988
															79.1	42.7949	78	45.0598
															79.2	42.8511	78.1	45.1086
															79.3	42.8933	78.2	45.1452
															79.4	42.9495	78.3	45.1818
															79.5	43.0339	78.4	45.2427
															79.6	43.1042	78.5	45.2793
															79.7	43.1464	78.6	45.2915
															79.8	43.1745	78.7	45.3403
															79.9	43.2588	78.8	45.3647
															80	43.3151	78.9	45.4501
															80.1	43.3432	79	45.4867
															80.3	43.4556	79.1	45.5111
															80.4	43.5541	79.2	45.5721
															80.5	43.5962	79.3	45.6087
															80.6	43.6665	79.4	45.6941
															80.7	43.6806	79.5	45.7429
															80.8	43.7228	79.6	45.7917
															80.9	43.7368	79.7	45.8039
															81	43.7649	79.8	45.8404
															81.1	43.8212	79.9	45.8892
															81.2	43.9055	80	45.938
															81.3	43.9477	80.1	45.9746
															81.4	44.0039	80.2	45.999
															81.5	44.018	80.3	46.0722
															81.6	44.0321	80.4	46.1332
															81.7	44.0602	80.5	46.1698
															81.8	44.0883	80.6	46.1942
															82	44.1586	80.7	46.2674
															82.1	44.2148	80.8	46.304
															82.2	44.2429	80.9	46.3406
															82.3	44.3132	81	46.3894
															82.4	44.3554	81.1	46.4382
															82.5	44.3695	81.2	46.4991
															82.6	44.3976	81.3	46.5845
															82.7	44.4257	81.4	46.6577
															82.8	44.4819	81.5	46.6943
															82.9	44.5241	81.7	46.7309
															83	44.5522	81.7516	46.7431
															83.1	44.5944	81.8	46.8041
															83.2	44.6085	81.9	46.9017
															83.3	44.6225	82	46.9749
															83.4	44.6506	82.1	47.0481
															83.5	44.6928	82.2	47.0725
															83.8	44.735	82.3	47.17
															83.9	44.8053	82.4	47.1944
															84	44.8334	82.5	47.2432
															84.2	44.8615	82.6	47.2798
															84.3	44.8896	82.7	47.3286
															84.4	44.974	82.8	47.353
															84.5	44.9881	82.9	47.4384
															84.6	45.0162	83	47.4506
															84.7	45.0583	83.1	47.475
															84.8	45.0865	83.2	47.4994
															84.9	45.1146	83.3	47.6092
															85	45.1286	83.4	47.658
															85.1	45.213	83.5	47.719
															85.2	45.2973	83.7	47.7312
															85.3	45.3114	83.8	47.7677
															85.5	45.3676	83.9	47.7921
															85.6	45.4098	84	47.8653
															85.7	45.4801	84.1	47.8775
															85.8	45.4942	84.2	47.8897
															85.9	45.5082	84.3	47.9263
															86	45.5645	84.4	47.9995
															86.1	45.5785	84.5	48.0361
															86.2	45.6066	84.6	48.1215
															86.3	45.6488	84.7	48.1703
															86.4	45.6629	84.8	48.2191
															86.5	45.691	84.9	48.2313
															86.6	45.7191	85	48.2679
															86.7	45.7753	85.1	48.3167
															86.8	45.7894	85.2	48.3411
															86.9	45.8316	85.3	48.3655
															87	45.8878	85.4	48.3899
															87.1	45.9159	85.5	48.402
															87.2	46.0143	85.6	48.4264
															87.3	46.0565	85.7	48.4752
															87.4	46.0706	85.8	48.5118
															87.5	46.1409	85.9	48.5484
															87.6	46.169	86.1	48.585
															87.7	46.2252	86.2	48.6216
															87.8	46.2955	86.3	48.6826
															87.9	46.3799	86.4	48.7314
															88	46.4361	86.5	48.7436
															88.1	46.4783	86.6	48.7802
															88.3	46.5064	86.7	48.89
															88.4	46.5205	86.8	48.9266
															88.5	46.5345	86.8271	48.9388
															88.6	46.5626	86.9	48.9632
															88.7	46.5907	87	48.9754
															88.8	46.6329	87.1	49.012
															88.9	46.6751	87.2	49.0729
															89	46.6892	87.3	49.1095
															89.1	46.7173	87.4	49.1339
															89.3	46.7313	87.5	49.1583
															89.4	46.7454	87.6	49.1827
															89.5	46.7735	87.7	49.2315
															89.6	46.8016	87.8	49.2803
															89.7	46.8438	87.9	49.3047
															89.9	46.886	88	49.3291
															90	46.9563	88.2	49.3901
															90.1	46.9844	88.3	49.4389
															90.2	47.0406	88.4	49.4877
															90.3	47.0969	88.5	49.5121
															90.4	47.1531	88.6	49.5975
															90.5	47.1812	88.7	49.6707
															90.6	47.2093	88.8	49.7194
															90.7	47.2515	88.9	49.756
															90.8	47.3077	89	49.8292
															91	47.364	89.1	49.9024
															91.1	47.3921	89.2	49.9756
															91.2	47.4624	89.3	50.0488
															91.3	47.5046	89.4	50.061
															91.4	47.603	89.5	50.1342
															91.5	47.6452	89.6	50.1464
															91.6	47.6733	89.7	50.2074
															91.8	47.7295	89.8	50.2562
															91.9	47.7717	89.9	50.2806
															92	47.7857	90	50.3537
															92.2	47.7998	90.1	50.4391
															92.3	47.8139	90.2	50.4635
															92.4	47.856	90.3	50.4879
															92.5	47.8701	90.4	50.5489
															92.6	47.9123	90.5	50.5977
															92.7	47.9685	90.6	50.6221
															92.8	48.0107	90.7	50.6587
															92.9	48.0669	90.8	50.6831
															93	48.1372	90.9	50.7319
															93.1	48.1513	91	50.7441
															93.2	48.2216	91.1	50.7563
															93.3	48.2497	91.2	50.7807
															93.4	48.2637	91.4	50.7929
															93.5	48.2919	91.5	50.8295
															93.6	48.3762	91.6	50.8783
															93.7	48.4184	91.7	50.9271
															93.8	48.4606	91.8	50.988
															93.9	48.4887	91.9	51.0124
															94	48.5168	92.1	51.0368
															94.1	48.5449	92.2	51.0856
															94.2	48.6012	92.3	51.11
															94.3	48.6433	92.4	51.1222
															94.4	48.6855	92.5	51.171
															94.5	48.6996	92.6844	51.1832
															94.6	48.7558	92.7	51.2198
															94.7	48.798	92.8	51.232
															94.8	48.8402	92.9	51.2564
															94.9	48.8823	93	51.3418
															95	48.9104	93.1	51.3662
															95.1	48.9526	93.2	51.4394
															95.3	48.9948	93.3	51.4882
															95.4	49.0229	93.4	51.5004
															95.5	49.0651	93.5	51.5126
															95.6	49.1073	93.6	51.5492
															95.7	49.1635	93.7	51.6223
															95.8	49.2338	93.8	51.6711
															95.9	49.3041	93.9	51.7321
															96	49.3181	94.1	51.7565
															96.1	49.3603	94.2	51.8053
															96.2	49.3884	94.4	51.8419
															96.3	49.4025	94.5	51.8663
															96.4	49.4306	94.6	51.9029
															96.5	49.5009	94.7	51.9395
															96.6	49.515	94.9	52.0005
															96.7	49.5853	95	52.0615
															96.8	49.6274	95.2	52.1225
															97	49.6837	95.4	52.1713
															97.1	49.7118	95.5	52.2201
															97.2	49.7821	95.6	52.281
															97.3	49.7961	95.7	52.3176
															97.4	49.8102	95.9	52.3908
															97.5	49.8243	96	52.4518
															97.5441	49.8383	96.1	52.5128
															97.6	49.8805	96.2	52.5494
															97.7	49.9086	96.3	52.586
															97.8	49.9367	96.4	52.647
															97.9	49.9649	96.5	52.7202
															98	49.9789	96.6	52.769
															98.1	50.0211	96.7	52.7934
															98.2	50.0773	96.8	52.83
															98.3	50.1054	96.9	52.8909
															98.4	50.1336	97	52.9763
															98.6	50.2179	97.1	53.0251
															98.7	50.2601	97.2	53.0739
															98.8	50.2741	97.3	53.0983
															98.9	50.3444	97.4	53.1471
															99	50.4007	97.5	53.1837
															99.1	50.4288	97.6	53.2081
															99.2	50.485	97.7	53.2447
															99.3	50.5272	97.8	53.2691
															99.4	50.5413	97.9	53.3057
															99.5	50.5694	98	53.3301
															99.6	50.5975	98.1	53.3667
															99.7	50.6256	98.2	53.3911
															99.8	50.6397	98.3	53.4155
															99.9	50.6537	98.4	53.4277
															100.1	50.6959	98.5	53.4765
															100.2	50.724	98.6	53.4887
															100.3	50.7521	98.7	53.5496
															100.4	50.7662	98.8	53.5618
															100.5	50.7803	98.9	53.5984
															100.6	50.8506	99	53.6594
															100.8	50.8646	99.1	53.6716
															100.9	50.8787	99.3	53.696
															101	50.9068	99.4	53.7204
															101.1	50.9349	99.5	53.757
															101.3	50.9911	99.6	53.8058
															101.4	51.0052	99.7	53.818
															101.5	51.0474	99.8	53.8546
															101.6	51.0755	99.9	53.8912
															101.7	51.1317	100	53.9034
															101.8	51.188	100.1	53.94
															101.9	51.2442	100.2	53.9644
															102	51.2583	100.3	53.9888
															102.1	51.3004	100.4	54.0376
															102.2	51.3426	100.5	54.1108
															102.3	51.3567	100.6	54.1352
															102.4	51.3988	100.7	54.1839
															102.5	51.427	100.8	54.2205
															102.6	51.4691	100.9	54.2449
															102.7	51.5113	101	54.2815
															102.8	51.6238	101.1	54.3059
															103	51.7081	101.2	54.3547
															103.1	51.7363	101.3	54.3913
															103.2	51.7644	101.4	54.4279
															103.3	51.7784	101.5	54.4889
															103.4	51.8066	101.7	54.5499
															103.5	51.8909	101.8	54.5743
															103.6	51.919	101.9	54.5987
															103.7	51.9612	102	54.6475
															103.8	51.9753	102.1	54.6719
															103.9	52.0034	102.2	54.7085
															104	52.0737	102.3	54.7207
															104.1	52.144	102.4	54.8061
															104.2	52.1721	102.5	54.8426
															104.3	52.2424	102.6	54.867
															104.7	52.2705	102.7	54.8914
															104.8	52.3127	102.8	54.9402
															104.9	52.3408	102.9	54.9524
															105	52.383	103	55.0134
															105.1	52.4251	103.1	55.0256
															105.2	52.4673	103.2	55.05
															105.3	52.5235	103.3	55.0744
															105.4	52.5657	103.4	55.0988
															105.6	52.6079	103.5	55.1232
															105.7	52.636	103.6	55.233
															105.9	52.6782	103.7	55.2696
															106	52.7063	103.8	55.2818
															106.1	52.7344	103.9	55.3062
															106.2	52.7625	104	55.3428
															106.3	52.8188	104.1	55.3672
															106.4	52.8328	104.2	55.3794
															106.5	52.8469	104.3	55.3916
															106.6	52.875	104.4	55.416
															106.7	52.9453	104.5	55.4647
															106.8	52.9734	104.6	55.4891
															106.9	52.9875	104.7	55.5257
															107	53.0156	104.8	55.5379
															107.1	53.0297	104.9	55.5623
															107.2	53.0859	105	55.5989
															107.3	53.1	105.1	55.6355
															107.4	53.1281	105.2	55.6843
															107.5	53.1421	105.3	55.7331
															107.6	53.1843	105.4	55.7697
															107.7	53.1984	105.5	55.7819
															107.8	53.2265	105.6	55.8185
															107.9	53.2827	105.7	55.8429
															108.1	53.339	105.8	55.9039
															108.3	53.353	105.9	55.9283
															108.5	53.3671	106	55.9527
															108.6	53.3811	106.1	55.9649
															108.9	53.3952	106.2	56.0015
															109	53.4233	106.3	56.0259
															109.1	53.4514	106.4	56.0869
															109.2	53.4795	106.6	56.099
															109.3	53.4936	106.7	56.1234
															109.5	53.5358	106.8	56.1966
															109.7	53.578	106.9	56.2698
															109.8	53.592	106.998	56.282
															109.9	53.6482	107	56.3064
															110	53.6904	107.1	56.3308
															110.1	53.7326	107.2	56.3552
															110.3	53.7467	107.3	56.3918
															110.4	53.7888	107.4	56.4162
															110.5	53.8029	107.5	56.4284
															110.6	53.817	107.569	56.4406
															110.7	53.831	107.6	56.4894
															110.8	53.8732	107.7	56.526
															110.9	53.9013	107.8	56.5748
															111	53.9294	107.9	56.5992
															111.1	53.9435	108	56.6358
															111.3	53.9997	108.1	56.6846
															111.5	54.0138	108.2	56.709
															111.6	54.0278	108.3	56.7577
															111.8	54.07	108.4	56.8553
															111.9	54.0981	108.5	56.8675
															112	54.1403	108.6	56.9041
															112.1	54.1544	108.7	56.9407
															112.2	54.1684	108.8	56.9651
															112.3	54.2106	108.9	57.0017
															112.4	54.2809	109	57.0505
															112.5	54.295	109.1	57.0871
															112.6	54.3231	109.2	57.1359
															112.7	54.3371	109.3	57.1603
															112.8	54.3652	109.4	57.1847
															112.9	54.4074	109.5	57.2213
															113	54.4496	109.6	57.2335
															113.2	54.5199	109.8	57.2701
															113.3	54.534	109.9	57.3067
															113.4	54.6042	110	57.3555
															113.5	54.6464	110.1	57.3677
															113.6	54.6605	110.2	57.392
															113.8	54.6886	110.3	57.4164
															113.9	54.7308	110.4	57.4408
															114	54.7448	110.5	57.453
															114.1	54.787	110.6	57.514
															114.2	54.8573	110.7	57.5872
															114.3	54.8995	110.8	57.636
															114.4	54.9838	110.9	57.6604
															114.6	55.026	111	57.6726
															114.7	55.0541	111.1	57.7092
															114.8	55.0682	111.2	57.7214
															114.9	55.0822	111.3	57.758
															115	55.0963	111.4	57.8068
															115.2	55.1385	111.5	57.819
															115.3	55.1807	111.6	57.8434
															115.4	55.2088	111.7	57.8556
															115.5	55.2369	111.8	57.8922
															115.6	55.265	111.9	57.9288
															115.7	55.3072	112.1	57.9532
															115.8	55.3634	112.2	57.9898
															116	55.3775	112.3	58.0263
															116.1	55.3915	112.4	58.0507
															116.2	55.4337	112.5	58.0751
															116.3	55.4618	112.6	58.1239
															116.4	55.4899	112.7	58.1361
															116.6	55.504	112.8	58.1727
															116.7	55.5181	112.9	58.1971
															116.8	55.5462	113	58.2093
															116.9	55.5884	113.1	58.2337
															117	55.6024	113.2	58.2703
															117.1	55.6587	113.3	58.3069
															117.2	55.6727	113.4	58.3191
															117.3	55.7149	113.5	58.3435
															117.4	55.7289	113.6	58.3557
															117.5	55.743	113.7	58.3923
															117.6	55.7571	113.8	58.4411
															117.7	55.7992	113.9	58.4533
															117.8	55.8414	114	58.4899
															117.9	55.8555	114.1	58.5021
															118	55.8695	114.2	58.5143
															118.1	55.8836	114.3	58.5631
															118.2	55.9258	114.4	58.5997
															118.3	55.9398	114.5	58.6606
															118.4	56.0101	114.6	58.7094
															118.6	56.0945	114.7	58.7338
															118.7	56.1367	114.8	58.7704
															118.8	56.1788	115	58.807
															118.9	56.221	115.1	58.8558
															119	56.2351	115.2	58.8924
															119.1	56.2913	115.3	58.9534
															119.2	56.3054	115.4	58.99
															119.3	56.3757	115.5	59.0266
															119.4	56.4038	115.7	59.0388
															119.5	56.4178	115.8	59.0998
															119.6	56.4459	115.9	59.112
															119.7	56.4741	116	59.1486
															119.8	56.5022	116.1	59.1852
															119.9	56.5584	116.2	59.2706
															120.1	56.6287	116.3	59.2949
															120.2	56.6709	116.4	59.3315
															120.3	56.7131	116.5	59.3925
															120.4	56.7412	116.6	59.4047
															120.5	56.7693	116.7	59.4169
															120.6	56.8115	116.8	59.4657
															120.7	56.8958	116.9	59.4901
															120.8	56.938	117	59.5267
															120.9	56.9802	117.1	59.5633
															121	57.0083	117.2	59.5877
															121.1	57.0505	117.3	59.5999
															121.2	57.1067	117.4	59.6121
															121.3	57.1348	117.5	59.6365
															121.4	57.1489	117.6	59.6731
															121.5	57.177	117.7	59.6975
															121.6	57.2051	117.8	59.7585
															121.7	57.2192	117.9	59.7829
															121.8	57.2895	118	59.8317
															121.9	57.3316	118.1	59.8561
															122	57.3738	118.2	59.8683
															122.1	57.4441	118.3	59.9414
															122.2	57.4582	118.4	60.0024
															122.3	57.4722	118.5	60.0146
															122.4	57.5144	118.6	60.0634
															122.6	57.5425	118.7	60.0756
															122.7	57.6409	118.8	60.0878
															122.8	57.6691	118.9	60.1122
															122.9	57.6831	119	60.1366
															123	57.7112	119.1	60.1732
															123.1	57.7394	119.2	60.222
															123.3	57.7675	119.3	60.2342
															123.4	57.7815	119.4	60.2464
															123.5	57.7956	119.5	60.283
															123.6	57.8237	119.6	60.3074
															123.9	57.8659	119.7	60.3562
															124	57.9081	119.8	60.405
															124.2	57.9221	119.9	60.4294
															124.3	57.9362	120	60.4538
															124.4	57.9643	120.1	60.5026
															124.6	57.9924	120.2	60.5514
															124.7	58.0205	120.366	60.5636
															124.8	58.0627	120.4	60.6001
															124.9	58.1049	120.5	60.6123
															124.913	58.1189	120.6	60.6611
															125	58.133	120.7	60.7343
															125.2	58.1611	120.8	60.7465
															125.3	58.2033	121	60.7587
															125.4	58.2314	121.1	60.7709
															125.5	58.2736	121.2	60.8197
															125.6	58.3017	121.3	60.8563
															125.7	58.3298	121.4	60.9539
															125.8	58.3439	121.5	60.9783
															125.9	58.3579	121.7	61.0027
															126	58.372	121.8	61.0271
															126.2	58.4142	121.9	61.0637
															126.3	58.4282	122	61.0881
															126.4	58.4704	122.1	61.1247
															126.5	58.4845	122.2	61.1735
															126.6	58.5126	122.3	61.1979
															126.7	58.5266	122.4	61.2344
															126.8	58.5829	122.5	61.2588
															126.9	58.6251	122.7	61.2832
															127.1	58.6391	122.8	61.2954
															127.2	58.6672	122.9	61.3198
															127.3	58.6953	123	61.3442
															127.4	58.7516	123.1	61.3686
															127.5	58.7656	123.2	61.393
															127.6	58.7938	123.3	61.4174
															127.7	58.8078	123.4	61.4296
															127.9	58.85	123.5	61.4418
															128	58.8641	123.6	61.4662
															128.1	58.9062	123.7	61.5028
															128.2	58.9484	123.8	61.515
															128.3	58.9625	123.9	61.5394
															128.4	59.0046	124	61.5516
															128.5	59.0187	124.1	61.5882
															128.6	59.0609	124.3	61.6248
															128.7	59.089	124.4	61.6858
															128.8	59.1593	124.5	61.698
															128.9	59.2155	124.6	61.7224
															129	59.2296	124.7	61.759
															129.1	59.2436	124.8	61.7956
															129.2	59.2718	124.9	61.8444
															129.4	59.2858	125.1	61.8687
															129.5	59.2999	125.2	61.8931
															129.6	59.3139	125.3	61.9175
															129.8	59.3561	125.4	61.9297
															130	59.3702	125.5	61.9541
															130.1	59.4264	125.6	62.0151
															130.2	59.4405	125.7	62.0273
															130.3	59.4826	125.8	62.0395
															130.5	59.5108	125.9	62.0883
															130.6	59.5529	126	62.1127
															130.7	59.5951	126.1	62.1371
															130.8	59.6232	126.2	62.1493
															131	59.6513	126.3	62.1859
															131.2	59.6795	126.4	62.1981
															131.3	59.6935	126.5	62.2225
															131.4	59.7076	126.6	62.2347
															131.5	59.7216	126.7	62.2591
															131.6	59.7498	126.8	62.2835
															131.7	59.7779	126.9	62.3079
															131.8	59.806	127	62.3811
															131.9	59.82	127.1	62.4055
															132	59.8482	127.2	62.4421
															132.1	59.8622	127.3	62.4787
															132.2	59.9044	127.4	62.4909
															132.3	59.9185	127.5	62.5518
															132.4	59.9747	127.7	62.564
															132.5	60.0028	127.8	62.6128
															132.6	60.0169	128	62.686
															132.7	60.0309	128.2	62.7226
															132.8	60.045	128.4	62.747
															132.9	60.0872	128.5	62.7836
															133	60.1012	128.7	62.7958
															133.1	60.1434	128.8	62.808
															133.2	60.1575	128.9	62.8324
															133.3	60.1856	129	62.8568
															133.5	60.2278	129.1	62.8934
															133.6	60.2699	129.2	62.9178
															133.7	60.3121	129.3	62.9544
															133.8	60.3402	129.4	62.991
															133.9	60.3683	129.5	63.052
															134	60.4105	129.6	63.0642
															134.1	60.4386	129.7	63.0764
															134.4	60.4668	129.8	63.113
															134.5	60.523	129.9	63.1252
															134.6	60.537	130	63.1495
															134.8	60.5792	130.1	63.1983
															134.9	60.5933	130.2	63.2349
															135	60.6073	130.3	63.2715
															135.2	60.6214	130.4	63.2837
															135.3	60.6355	130.5	63.3081
															135.4	60.6495	130.6	63.3447
															135.5	60.6636	130.8	63.3569
															135.6	60.6776	130.9	63.3691
															135.7	60.7058	131	63.3813
															135.8	60.7479	131.2	63.3935
															135.9	60.762	131.4	63.4057
															136	60.7901	131.5	63.4423
															136.2	60.8323	131.6	63.4789
															136.3	60.8604	131.7	63.5277
															136.4	60.8885	131.8	63.5399
															136.5	60.9588	131.9	63.5643
															136.7	61.001	132	63.6131
															136.8	61.015	132.1	63.6375
															137	61.0572	132.2	63.6863
															137.1	61.0713	132.3	63.7229
															137.2	61.0994	132.4	63.7351
															137.4	61.1275	132.5	63.7595
															137.5	61.1697	132.6	63.7717
															137.6	61.1837	132.7	63.7838
															138	61.1978	132.8	63.8082
															138.1	61.2119	132.9	63.857
															138.2	61.2259	133.1	63.8936
															138.3	61.254	133.2	63.918
															138.4	61.2822	133.3	63.9912
															138.6	61.3103	133.4	64.0034
															138.7	61.3384	133.5	64.0156
															138.8	61.3525	133.7	64.0278
															139	61.3665	133.8	64.04
															139.1	61.3946	134	64.0644
															139.3	61.4227	134.1	64.101
															139.4	61.4368	134.2	64.1498
															139.5	61.4649	134.4	64.1864
															139.6	61.5071	134.5	64.2108
															139.8	61.5212	134.6	64.2352
															139.9	61.5633	134.7	64.2718
															140	61.5774	134.9	64.2962
															140.3	61.6055	135	64.3206
															140.4	61.6336	135.1	64.3572
															140.6	61.6617	135.2	64.3694
															140.7	61.6899	135.3	64.3816
															140.8	61.7039	135.4	64.406
															141	61.732	135.5	64.4425
															141.1	61.7742	135.6	64.4669
															141.3	61.8305	135.7	64.4791
															141.4	61.8445	135.8	64.5157
															141.5	61.8586	135.9	64.5523
															141.6	61.8726	136	64.5767
															141.8	61.9007	136.1	64.6011
															141.9	61.957	136.2	64.6255
															142	61.9851	136.3	64.6743
															142.1	62.0132	136.4	64.6987
															142.2	62.0554	136.5	64.7109
															142.4	62.0976	136.6	64.7719
															142.6	62.1257	136.7	64.7963
															142.8	62.1538	136.8	64.8207
															142.9	62.1819	136.9	64.8329
															143	62.196	137	64.8695
															143.1	62.2382	137.1	64.8939
															143.2	62.2663	137.2	64.9305
															143.3	62.2944	137.3	64.9915
															143.4	62.3506	137.4	65.0281
															143.5	62.3787	137.5	65.0403
															143.6	62.3928	137.6	65.0768
															143.7	62.4069	137.7	65.1012
															143.8	62.435	137.8	65.15
															143.9	62.449	137.9	65.1622
															144	62.5053	138	65.1866
															144.2	62.5193	138.1	65.2354
															144.3	62.5474	138.2	65.272
															144.5	62.5756	138.3	65.3086
															144.6	62.6037	138.4	65.3208
															144.7	62.6318	138.5	65.3452
															144.8	62.6599	138.7	65.3574
															145	62.688	138.8	65.3696
															145.1	62.7162	138.9	65.394
															145.2	62.7583	139	65.4184
															145.3	62.7864	139.1	65.4428
															145.4	62.8427	139.2	65.4794
															145.5	62.8567	139.3	65.5038
															145.8	62.8989	139.4	65.516
															145.9	62.927	139.5	65.5526
															146	62.9411	139.6	65.6014
															146.1	62.9552	139.8	65.638
															146.2	62.9692	139.9	65.6746
															146.4	62.9973	140	65.7111
															146.6	63.0114	140.1	65.7355
															146.7	63.0254	140.2	65.7843
															146.8	63.0395	140.3	65.8087
															146.9	63.1098	140.4	65.8575
															147.1	63.1239	140.5	65.8941
															147.2	63.152	140.6	65.9063
															147.3	63.166	140.7	65.9307
															147.4	63.1942	140.8	65.9551
															147.5	63.2082	140.9	66.0039
															147.6	63.2223	141	66.0283
															147.7	63.2363	141.1	66.0649
															147.8	63.2644	141.2	66.0893
															147.9	63.3207	141.3	66.1503
															148	63.3629	141.5	66.1869
															148.2	63.391	141.6	66.2235
															148.3	63.4191	141.7	66.2357
															148.5	63.4613	141.8	66.2723
															148.6	63.4894	141.9	66.3089
															148.7	63.5175	142.1	66.3211
															148.8	63.5456	142.2	66.3333
															148.9	63.5737	142.4	66.3576
															149	63.6019	142.5	66.4186
															149.2	63.6159	142.6	66.4552
															149.3	63.6581	142.7	66.5162
															149.5	63.6862	142.8	66.5284
															149.6	63.7003	142.9	66.5406
															149.7	63.7424	143	66.5528
															149.8	63.7565	143.1	66.565
															149.9	63.7706	143.2	66.5894
															150.1	63.7987	143.3	66.6016
															150.2	63.8268	143.5	66.6138
															150.3	63.8409	143.6	66.6382
															150.4	63.883	143.7	66.6992
															150.5	63.8971	143.8	66.7236
															150.7	63.9252	143.9	66.7724
															150.8	63.9533	144	66.7968
															151	64.0096	144.1	66.8212
															151.1	64.0377	144.3	66.8456
															151.2	64.0517	144.4	66.87
															151.3	64.0799	144.5	66.8822
															151.4	64.108	144.6	66.9066
															151.7	64.1361	144.7	66.931
															151.8	64.1783	144.8	66.9432
															151.9	64.1923	144.9	66.9554
															152	64.2345	145	66.9919
															152.1	64.2626	145.1	67.0041
															152.3	64.2907	145.3	67.0163
															152.4	64.3329	145.4	67.0529
															152.5	64.3751	145.5	67.0651
															152.6	64.4032	145.7	67.0773
															152.7	64.4594	145.8	67.1139
															152.8	64.4735	145.9	67.1383
															153	64.5157	146	67.1627
															153.2	64.5438	146.1	67.1871
															153.3	64.5579	146.2	67.2237
															153.4	64.586	146.3	67.2603
															153.5	64.6141	146.5	67.2725
															153.6	64.6422	146.6	67.2969
															153.7	64.6844	146.7	67.3335
															153.8	64.7125	146.8	67.3579
															153.9	64.7547	146.9	67.3701
															154	64.7828	147	67.3945
															154.1	64.7969	147.1	67.4067
															154.3	64.8109	147.2	67.4311
															154.4	64.825	147.3	67.4433
															154.6	64.8531	147.4	67.4555
															154.7	64.8812	147.5	67.5043
															154.8	64.8953	147.7	67.5287
															155	64.9374	147.9	67.5653
															155.1	64.9515	148	67.5897
															155.2	64.9656	148.1	67.6141
															155.3	64.9796	148.2	67.6384
															155.5	64.9937	148.3	67.6628
															155.6	65.0218	148.4	67.675
															155.7	65.0358	148.5	67.7238
															156.1	65.0499	148.6	67.7482
															156.2	65.078	148.7	67.7848
															156.3	65.1202	148.8	67.797
															156.5	65.1343	148.9	67.8214
															156.6	65.1483	149.1	67.858
															156.7	65.1624	149.2	67.8824
															156.9	65.1764	149.3	67.919
															157.1	65.1905	149.4	67.9312
															157.2	65.2046	149.5	67.9434
															157.3	65.2186	149.6	67.98
															157.4	65.2327	149.7	67.9922
															157.5	65.2467	149.8	68.0044
															157.6	65.2748	149.9	68.0166
															157.7	65.2889	150.1	68.041
															157.8	65.317	150.2	68.0532
															157.9	65.3592	150.5	68.0898
															158	65.3873	150.6	68.102
															158.1	65.4014	150.7	68.1142
															158.2	65.4154	150.8	68.1264
															158.3	65.4295	150.9	68.1386
															158.4	65.4436	151	68.1752
															158.5	65.4857	151.1	68.1874
															158.6	65.5279	151.2	68.2118
															158.8	65.542	151.3	68.2362
															158.9	65.5701	151.4	68.2484
															159	65.5841	151.5	68.2606
															159.1	65.6263	151.6	68.2727
															159.2	65.6544	151.7	68.2849
															159.4	65.6685	151.8	68.2971
															159.5	65.7247	151.9	68.3337
															159.6	65.7528	152	68.3825
															159.7	65.8091	152.1	68.4069
															159.9	65.8231	152.3	68.4435
															160	65.8372	152.4	68.4679
															160.1	65.8653	152.6	68.4923
															160.2	65.8794	152.7	68.5289
															160.3	65.8934	152.8	68.5411
															160.6	65.9216	152.9	68.5655
															160.7	65.9356	153.1	68.6021
															160.8	65.9637	153.2	68.6265
															161	66.0059	153.3	68.6753
															161.1	66.034	153.5	68.6997
															161.3	66.0481	153.6	68.7119
															161.4	66.1184	153.8	68.7607
															161.6	66.1324	153.9	68.7729
															161.7	66.1746	154	68.7973
															161.9	66.2027	154.1	68.8095
															162	66.2308	154.2	68.8217
															162.1	66.2449	154.3	68.8583
															162.2	66.2871	154.4	68.8705
															162.3	66.3011	154.5	68.8827
															162.5	66.3152	154.6	68.9071
															162.8	66.3293	154.7	68.9314
															162.9	66.3574	154.8	68.9924
															163	66.3714	154.9	69.0168
															163.1	66.3996	155	69.0534
															163.2	66.4558	155.1	69.0656
															163.4	66.4839	155.3	69.09
															163.5	66.512	155.4	69.1144
															163.6	66.5401	155.5	69.1754
															163.7	66.5542	155.7	69.1998
															163.8	66.5683	155.8	69.2242
															164	66.5823	155.9	69.2486
															164.1	66.6104	156	69.273
															164.4	66.6667	156.1	69.2974
															164.5	66.6948	156.2	69.3096
															164.9	66.7229	156.4	69.3218
															165	66.751	156.5	69.334
															165.1	66.7651	156.6	69.3584
															165.3	66.8073	156.7	69.3828
															165.4	66.8213	156.8	69.395
															165.6	66.8354	156.9	69.4072
															165.7	66.9057	157	69.4194
															165.8	66.9478	157.1	69.4438
															165.9	66.976	157.2	69.4682
															166	67.0181	157.3	69.4926
															166.1	67.0463	157.4	69.517
															166.2	67.0603	157.5	69.5292
															166.4	67.0884	157.6	69.5535
															166.5	67.1165	157.8	69.5779
															166.6	67.1306	157.9	69.5901
															166.8	67.1447	158	69.6023
															167	67.1728	158.1	69.6145
															167.1	67.2009	158.2	69.6267
															167.2	67.229	158.3	69.6511
															167.5	67.2431	158.4	69.6999
															167.6	67.2712	158.5	69.7121
															167.7	67.2853	158.6	69.7487
															167.8	67.3134	158.7	69.7609
															167.9	67.3274	158.8	69.7853
															168.1	67.3837	158.9	69.8097
															168.4	67.3977	159	69.8219
															168.6	67.4118	159.1	69.8585
															168.7	67.454	159.2	69.8829
															168.9	67.4821	159.3	69.9195
															169	67.4961	159.4	69.9439
															169.1	67.5102	159.6	69.9683
															169.2	67.5383	159.7	70.0049
															169.3	67.5664	159.8	70.0293
															169.6	67.6086	159.9	70.0659
															169.7	67.6508	160	70.0781
															169.8	67.6648	160.1	70.0903
															169.9	67.6789	160.2	70.1147
															170	67.7211	160.3	70.1391
															170.1	67.7351	160.4	70.1757
															170.2	67.7492	160.5	70.2
															170.3	67.7633	160.8	70.2488
															170.4	67.7773	160.9	70.2732
															170.5	67.7914	161	70.322
															170.6	67.8335	161.2	70.3342
															170.7	67.8476	161.3	70.3708
															170.9	67.8617	161.4	70.3952
															171	67.8898	161.5	70.4074
															171.2	67.9038	161.6	70.4196
															171.3	67.9179	162.1	70.4318
															171.4	67.932	162.2	70.4684
															171.5	67.946	162.3	70.4806
															171.7	67.9601	162.4	70.4928
															171.8	67.9741	162.5	70.505
															171.9	67.9882	162.8	70.566
															172	68.0022	163.1	70.5782
															172.1	68.0163	163.2	70.6148
															172.4	68.0304	163.3	70.6392
															172.5	68.0444	163.4	70.6636
															172.7	68.0585	163.5	70.688
															172.8	68.0725	163.6	70.7002
															172.9	68.1007	163.7	70.7124
															173	68.1147	163.8	70.7612
															173.2	68.1428	163.9	70.7856
															173.3	68.171	164.1	70.7978
															173.4	68.1991	164.2	70.8343
															173.6	68.2272	164.4	70.8709
															173.7	68.2694	164.5	70.9075
															173.9	68.3256	164.6	70.9319
															174	68.3678	164.7	70.9441
															174.5	68.3818	164.8	70.9563
															174.7	68.3959	164.9	70.9685
															174.8	68.4381	165	70.9929
															174.9	68.4521	165.1	71.0051
															175	68.4662	165.2	71.0295
															175.1	68.4802	165.4	71.0417
															175.3	68.4943	165.5	71.0661
															175.6	68.5084	165.6	71.0783
															175.7	68.5365	165.7	71.0905
															175.8	68.5505	165.8	71.1027
															175.9	68.5927	166.1	71.1393
															176.1	68.6208	166.2	71.1637
															176.2	68.6349	166.3	71.1759
															176.4	68.6911	166.4	71.1881
															176.6	68.7052	166.7	71.2003
															176.7	68.7192	166.8	71.2125
															176.8	68.7474	166.9	71.2369
															176.9	68.7614	167	71.2491
															177	68.7895	167.1	71.2735
															177.1	68.8036	167.2	71.2857
															177.2	68.8317	167.5	71.3101
															177.3	68.8458	167.6	71.3345
															177.4	68.8598	167.7	71.3467
															177.5	68.902	167.8	71.3833
															177.6	68.9442	167.9	71.4077
															177.8	68.9723	168	71.4199
															177.9	68.9864	168.4	71.4321
															178	69.0145	168.5	71.4443
															178.1	69.0426	168.6	71.4687
															178.4	69.0567	168.7	71.4808
															178.6	69.0848	168.8	71.493
															178.7	69.0988	169	71.5052
															178.8	69.1129	169.1	71.5296
															178.9	69.127	169.2	71.5418
															179	69.1551	169.3	71.554
															179.3	69.1972	169.4	71.5906
															179.4	69.2254	169.5	71.6028
															179.5	69.2394	169.6	71.6272
															179.6	69.2675	169.7	71.6516
															179.7	69.2957	169.8	71.6882
															180	69.3238	170	71.7004
															180.1	69.3378	170.1	71.7126
															180.4	69.3659	170.2	71.737
															180.7	69.3941	170.3	71.7614
															181	69.4222	170.4	71.7736
															181.1	69.4503	170.5	71.7858
															181.3	69.4644	170.7	71.8346
															181.4	69.4784	170.8	71.859
															181.5	69.5065	170.9	71.8834
															181.7	69.5347	171	71.9078
															181.8	69.5487	171.1	71.9566
															181.9	69.5768	171.2	71.981
															182.2	69.6049	171.3	72.0176
															182.5	69.6331	171.4	72.042
															182.6	69.6471	171.5	72.0542
															182.7	69.6752	171.8	72.0786
															182.9	69.7034	172	72.1273
															183	69.7174	172.1	72.1517
															183.1	69.7315	172.2	72.1761
															183.2	69.7737	172.3	72.1883
															183.3	69.8158	172.4	72.2005
															183.5	69.8439	172.5	72.2127
															183.6	69.858	172.6	72.2249
															183.7	69.8721	172.7	72.2371
															183.8	69.9283	172.8	72.2615
															184	69.9564	173	72.2737
															184.4	69.9845	173.1	72.2981
															184.6	69.9986	173.3	72.3103
															184.7	70.0127	173.4	72.3225
															184.8	70.0267	173.5	72.3469
															184.9	70.0408	173.6	72.3713
															185.2	70.0689	173.7	72.3835
															185.4	70.097	174	72.4201
															185.6	70.1111	174.1	72.4323
															185.7	70.1814	174.3	72.4445
															185.8	70.1954	174.4	72.4689
															185.9	70.2095	174.5	72.4933
															186.3	70.2517	174.6	72.5055
															186.5	70.3079	174.8	72.5299
															186.6	70.3219	174.9	72.5421
															186.7	70.336	175	72.5787
															186.9	70.3501	175.1	72.5909
															187.2	70.4063	175.4	72.6153
															187.3	70.4344	175.8	72.6275
															187.5	70.4766	175.9	72.6519
															187.7	70.4907	176	72.6641
															187.8	70.5047	176.1	72.6885
															188.1	70.5188	176.4	72.7129
															188.3	70.5609	176.5	72.7373
															188.5	70.5891	176.6	72.7616
															188.6	70.6031	176.7	72.7738
															188.666	70.6172	176.9	72.786
															188.7	70.6312	177	72.8104
															188.8	70.6453	177.2	72.8348
															189	70.6594	177.3	72.8592
															189.1	70.7015	177.4	72.8836
															189.4	70.7156	177.5	72.908
															189.5	70.7296	177.6	72.9446
															189.6	70.7437	178.1	72.9812
															189.7	70.7718	178.4	72.9934
															189.8	70.7859	178.5	73.0178
															189.9	70.814	178.6	73.03
															190	70.8281	178.7	73.0422
															190.1	70.8421	178.8	73.0666
															190.2	70.8562	178.9	73.091
															190.4	70.8843	179	73.1032
															190.5	70.8984	179.1	73.1398
															190.6	70.9265	179.2	73.152
															191.1	70.9827	179.3	73.1642
															191.2	71.0249	179.4	73.1886
															191.4	71.0389	179.5	73.2008
															191.5	71.053	179.6	73.213
															191.6	71.0671	179.7	73.2252
															191.7	71.0811	179.9	73.2374
															191.8	71.1092	180	73.2496
															192.8	71.1374	180.1	73.2618
															192.9	71.1514	180.2	73.2984
															193	71.1655	180.3	73.3106
															193.1	71.1936	180.4	73.335
															193.2	71.2076	180.6	73.3594
															193.3	71.2498	180.8	73.4081
															193.6	71.2639	181	73.4325
															193.7	71.2779	181.2	73.4691
															193.8	71.3342	181.3	73.4935
															193.9	71.3482	181.4	73.5301
															194	71.3623	181.5	73.5545
															194.1	71.3764	181.6	73.5911
															194.2	71.4045	181.7	73.6277
															194.3	71.4185	181.8	73.6399
															194.4	71.4326	181.9	73.6643
															194.6	71.4466	182.2	73.6765
															194.7	71.4607	182.3	73.7009
															194.8	71.4888	182.4	73.7253
															195	71.5451	182.6	73.7375
															195.1	71.5732	182.8	73.7497
															195.4	71.5872	182.9	73.7741
															195.5	71.6013	183	73.7985
															195.6	71.6294	183.3	73.8107
															195.9	71.6435	183.5	73.8351
															196.2	71.6575	183.6	73.8473
															196.3	71.6716	183.7	73.8595
															196.4	71.6997	183.9	73.8961
															196.6	71.7138	184	73.9083
															196.7	71.7278	184.3	73.9205
															197.3	71.7559	184.4	73.9327
															197.4	71.77	184.5	73.9449
															197.5	71.8122	184.6	73.9937
															197.6	71.8403	184.7	74.0059
															197.8	71.8825	184.9	74.0424
															197.9	71.8965	185	74.0668
															198	71.9246	185.1	74.1034
															198.1	71.9668	185.2	74.1156
															198.4	71.9809	185.4	74.14
															198.5	71.9949	185.5	74.1522
															198.8	72.0231	185.6	74.1644
															199.1	72.0371	185.8	74.1766
															199.3	72.0512	185.9	74.1888
															199.4	72.0793	186	74.2132
															199.5	72.0934	186.1	74.2376
															199.6	72.1074	186.2	74.2742
															199.7	72.1215	186.3	74.2864
															200	72.1355	186.4	74.3108
															200.1	72.1496	186.5	74.323
															200.3	72.1777	186.6	74.3474
															200.5	72.2058	186.7	74.384
															200.7	72.2199	186.8	74.3962
															200.8	72.2339	186.9	74.4206
															200.9	72.248	187.1	74.4328
															201.1	72.2621	187.2	74.4572
															201.2	72.3183	187.3	74.4694
															201.3	72.3745	187.5	74.4816
															201.4	72.3886	187.6	74.4938
															201.5	72.4026	187.7	74.506
															201.6	72.4308	187.8	74.5304
															201.8	72.4448	188.1	74.5548
															202.1	72.4589	188.2	74.5914
															202.2	72.4729	188.3	74.6036
															202.3	72.487	188.4	74.628
															202.7	72.5292	188.5	74.6646
															203	72.5432	188.6	74.6889
															203.2	72.5713	188.7	74.7011
															203.3	72.6135	188.8	74.7133
															203.6	72.6416	188.9	74.7255
															203.9	72.6838	189.1	74.7499
															204.1	72.726	189.3	74.7621
															204.2	72.7401	189.5	74.7865
															204.3	72.8244	189.6	74.7987
															204.5	72.8385	189.9	74.8109
															204.6	72.8525	190.2	74.8353
															204.8	72.8806	190.3	74.8475
															205.1	72.8947	190.4	74.8597
															205.2	72.9228	190.5	74.8841
															205.399	72.9369	190.7	74.8963
															205.4	72.9509	190.8	74.9329
															205.5	72.965	190.9	74.9573
															205.7	72.9931	191	74.9695
															205.8	73.0072	191.1	75.0061
															205.9	73.0212	191.5	75.0305
															206.1	73.0353	191.6	75.0427
															206.2	73.0775	191.7	75.0793
															206.3	73.1056	192	75.1037
															206.4	73.1196	192.1	75.1525
															206.5	73.1478	192.3	75.1647
															206.7	73.1618	192.4	75.1769
															206.8	73.1899	192.6	75.1891
															206.9	73.2321	192.7	75.2013
															207.3	73.2462	193.1	75.2379
															207.6	73.2743	193.4	75.2623
															207.7	73.2883	193.5	75.2745
															207.8	73.3305	193.6	75.2867
															207.9	73.3446	193.7	75.2989
															208.1	73.3586	193.8	75.3232
															208.3	73.3868	193.9	75.3476
															208.4	73.4008	194.1	75.372
															208.6	73.4149	194.2	75.3842
															208.7	73.4289	194.4	75.3964
															208.8	73.443	194.5	75.4208
															208.9	73.4711	194.6	75.4452
															209	73.4852	194.8	75.4574
															209.1	73.5273	195.1	75.4696
															209.5	73.5555	195.2	75.5184
															209.6	73.5695	195.4	75.5306
															209.8	73.5836	195.6	75.5428
															210.1	73.6117	195.7	75.5672
															210.2	73.6539	195.9	75.5794
															210.3	73.6679	196	75.5916
															210.4	73.682	196.1	75.616
															210.5	73.696	196.2	75.6282
															210.6	73.7101	196.4	75.6648
															210.8	73.7523	196.5	75.6892
															211	73.7804	196.6	75.7258
															211.1	73.7945	196.7	75.7624
															211.2	73.8085	196.8	75.7746
															211.3	73.8366	196.9	75.7868
															211.4	73.8788	197	75.8478
															211.5	73.8929	197.2	75.86
															211.7	73.921	197.3	75.8722
															211.8	73.935	197.4	75.8966
															211.9	73.9491	197.7	75.9088
															212	73.9632	198	75.9332
															212.1	73.9772	198.1	75.9454
															212.2	74.0053	198.2	75.9576
															212.5	74.0194	198.5	75.9697
															212.6	74.0616	198.6	75.9819
															212.7	74.0897	198.9	76.0185
															212.8	74.1038	199	76.0307
															213	74.1178	199.3	76.0551
															213.1	74.1319	199.6	76.0917
															213.5	74.1459	200	76.1039
															213.7	74.16	200.1	76.1405
															214	74.174	200.2	76.1649
															214.1	74.1881	200.3	76.1771
															214.3	74.2022	200.7	76.1893
															214.4	74.2162	200.8	76.2137
															214.6	74.2303	200.9	76.2381
															214.8	74.2443	201	76.2625
															215	74.2865	201.1	76.2991
															215.1	74.3006	201.3	76.3113
															215.3	74.3146	201.4	76.3357
															215.4	74.3287	201.6	76.3601
															215.7	74.3568	201.7	76.3723
															216	74.399	202	76.3967
															216.4	74.4271	202.1	76.4089
															216.5	74.4412	202.2	76.4333
															216.6	74.4552	202.3	76.4577
															216.7	74.4833	202.6	76.4821
															217	74.4974	202.7	76.4943
															217.1	74.5115	202.8	76.5065
															217.2	74.5255	203	76.5187
															217.5	74.5396	203.1	76.5309
															217.6	74.5677	203.2	76.5797
															217.9	74.5818	203.3	76.604
															218	74.5958	203.4	76.6162
															218.2	74.638	203.5	76.6284
															218.3	74.652	203.6	76.6528
															218.4	74.6661	203.8	76.6772
															218.5	74.6802	203.9	76.6894
															218.6	74.7364	204	76.7016
															218.7	74.7505	204.3	76.7138
															218.8	74.7786	204.4	76.7382
															218.9	74.7926	204.5	76.7504
															219.2	74.8348	204.7	76.7626
															219.4	74.8629	205	76.7748
															219.5	74.877	205.2	76.787
															219.7	74.9051	205.3	76.7992
															219.8	74.9332	205.4	76.8236
															219.9	74.9754	205.5	76.8358
															220	74.9895	205.6	76.8602
															220.2	75.0035	205.8	76.8724
															220.3	75.0176	205.9	76.8968
															220.4	75.0316	206	76.9334
															220.6	75.0457	206.1	76.9456
															220.8	75.0597	206.4	76.9578
															220.9	75.0738	206.5	76.9822
															221	75.116	206.6	76.9944
															221.8	75.13	206.8	77.0432
															221.9	75.1441	206.9	77.0554
															222.1	75.1582	207.2	77.0676
															222.3	75.1722	207.3	77.092
															222.4	75.1863	207.5	77.1164
															222.8	75.2003	207.6	77.1652
															222.9	75.2144	207.8	77.1774
															223	75.2566	207.9	77.214
															223.1	75.2706	208.1	77.2384
															223.2	75.2847	208.4	77.2749
															223.5	75.3269	208.5	77.2871
															223.8	75.3409	208.6	77.2993
															224	75.369	208.7	77.3115
															224.4	75.3831	209	77.3603
															225	75.3972	209.2	77.3847
															225.1	75.4112	209.5	77.3969
															225.2	75.4253	209.7	77.4091
															225.3	75.4393	209.8	77.4335
															225.4	75.4675	209.9	77.4457
															225.5	75.4815	210.1	77.4701
															225.7	75.4956	210.5	77.4823
															226	75.5096	210.6	77.4945
															226.2	75.5518	210.7	77.5189
															226.7	75.5659	210.8	77.5311
															226.8	75.594	210.9	77.5433
															226.9	75.608	211	77.5677
															227.1	75.6221	211.1	77.5799
															227.3	75.6362	211.3	77.5921
															227.5	75.6502	211.4	77.6043
															227.8	75.6643	211.5	77.6165
															228.1	75.7065	211.6	77.6287
															228.3	75.7205	211.8	77.6775
															228.5	75.7346	212	77.6897
															228.7	75.8049	212.1	77.7263
															228.8	75.8189	212.3	77.7507
															229	75.847	212.4	77.7751
															229.1	75.8611	212.7	77.7873
															229.3	75.8752	212.9	77.7995
															229.5	75.9173	213.2	77.8117
															229.7	75.9314	213.3	77.8239
															229.8	75.9455	213.5	77.8361
															229.9	75.9595	213.6	77.8727
															230	75.9876	213.9	77.8848
															230.2	76.0157	214	77.897
															230.3	76.0298	214.2	77.9214
															230.4	76.0579	214.3	77.9458
															230.7	76.086	214.4	77.958
															230.9	76.1001	214.5	77.9702
															231.1	76.1282	214.6	77.9946
															231.2	76.1423	215.1	78.0068
															231.3	76.1704	215.2	78.0312
															231.4	76.1845	215.3	78.0434
															231.6	76.1985	215.4	78.0678
															231.8	76.2126	215.7	78.08
															232.2	76.2407	215.8	78.0922
															232.3	76.2547	215.9	78.1044
															232.5	76.2969	216.1	78.1288
															232.7	76.311	216.2	78.141
															232.8	76.325	216.4	78.1532
															233	76.3391	216.5	78.1654
															233.2	76.3532	216.6	78.1898
															233.3	76.3672	216.7	78.202
															233.4	76.3813	216.8	78.2264
															233.6	76.4094	216.9	78.2386
															233.7	76.4235	217.1	78.2508
															233.9	76.4516	217.2	78.263
															234	76.4656	217.3	78.2752
															234.1	76.4797	217.7	78.2996
															234.3	76.4937	218	78.3484
															234.4	76.5078	218.1	78.385
															234.5	76.5219	218.2	78.3972
															234.6	76.5359	218.5	78.4216
															234.8	76.564	218.6	78.4338
															234.9	76.5781	218.8	78.446
															235	76.5922	218.9	78.4704
															235.3	76.6062	219.1	78.4826
															235.4	76.6343	219.2	78.4948
															235.6	76.6765	219.3	78.507
															235.8	76.6906	219.4	78.5192
															235.9	76.7187	219.6	78.5679
															236	76.7327	220	78.5923
															236.4	76.7468	220.4	78.6167
															236.5	76.7609	220.5	78.6289
															236.6	76.7749	220.6	78.6533
															236.8	76.789	220.7	78.6777
															236.9	76.803	220.8	78.6899
															237.1	76.8171	221	78.7143
															237.2	76.8312	221.2	78.7265
															237.3	76.8452	221.3	78.7509
															237.7	76.8733	221.5	78.7631
															237.8	76.8874	221.6	78.7753
															238.1	76.9014	221.7	78.7875
															238.4	76.9155	221.8	78.8119
															238.7	76.9296	222.1	78.8241
															238.9	76.9577	222.2	78.8363
															239.1	76.9999	222.4	78.8485
															239.2	77.028	222.5	78.8729
															239.5	77.042	222.6	78.8851
															239.6	77.0561	222.9	78.8973
															239.7	77.0702	223.2	78.9339
															239.8	77.0842	223.3	78.9461
															240	77.1123	223.4	78.9705
															240.1	77.1264	223.5	78.9949
															240.2	77.1404	223.7	79.0193
															240.3	77.1545	223.8	79.0315
															240.5	77.1686	223.9	79.0437
															240.6	77.1967	224	79.0803
															240.8	77.2107	224.1	79.1047
															241	77.2248	224.2	79.1169
															241.5	77.281	224.4	79.1413
															241.6	77.3092	224.5	79.1535
															241.7	77.3373	224.6	79.1657
															241.8	77.3513	224.7	79.19
															241.9	77.3935	225	79.2144
															242	77.4357	225.1	79.2266
															242.1	77.4497	225.2	79.2388
															242.3	77.4638	225.5	79.2632
															242.6	77.4919	225.8	79.2876
															242.8	77.506	226	79.2998
															243.2	77.52	226.1	79.312
															243.5	77.5341	226.2	79.3608
															243.6	77.5622	226.6	79.3974
															243.8	77.5763	226.9	79.4218
															243.9	77.5903	227	79.434
															244.1	77.6044	227.3	79.4462
															244.3	77.6184	227.4	79.4706
															244.5	77.6325	227.5	79.4828
															244.7	77.6466	227.9	79.5072
															244.8	77.6747	228	79.5316
															245	77.6887	228.1	79.5438
															245.1	77.7028	228.4	79.556
															245.2	77.7309	228.5	79.5804
															245.3	77.759	228.8	79.6048
															245.4	77.7731	229.1	79.617
															245.5	77.7872	229.2	79.6292
															245.6	77.8293	229.3	79.6536
															245.8	77.8434	229.4	79.6658
															245.9	77.8574	229.6	79.6902
															246	77.8996	229.7	79.7024
															246.1	77.9137	229.9	79.7146
															246.5	77.9559	230.4	79.7268
															246.6	77.9699	230.5	79.739
															246.9	77.998	230.6	79.7512
															247.2	78.0121	230.9	79.7634
															247.4	78.0261	231	79.7878
															247.5	78.0402	231.1	79.8243
															247.6	78.0543	231.2	79.8609
															247.7	78.0683	231.4	79.8853
															247.8	78.0964	231.5	79.9097
															247.9	78.1527	231.6	79.9341
															248.1	78.1667	231.9	79.9463
															248.2	78.1808	232	79.9585
															248.3	78.1949	232.1	79.9707
															248.8	78.2089	232.2	79.9829
															249.1	78.223	232.4	80.0073
															249.4	78.237	232.6	80.0195
															249.5	78.2792	233	80.0317
															249.6	78.2933	233.2	80.0439
															249.9	78.3073	233.3	80.0561
															250	78.3214	233.4	80.0683
															250.2	78.3354	233.5	80.1049
															250.3	78.3495	233.6	80.1171
															250.4	78.3636	233.7	80.1415
															250.5	78.3776	233.8	80.1659
															250.6	78.4057	233.9	80.1781
															250.7	78.4339	234.1	80.1903
															250.9	78.462	234.3	80.2025
															251	78.4901	234.5	80.2269
															251.1	78.5323	234.6	80.2635
															251.2	78.5463	234.8	80.2757
															251.3	78.5604	235	80.3123
															251.4	78.5885	235.2	80.3245
															251.5	78.6026	235.3	80.3489
															251.6	78.6307	235.4	80.3733
															251.8	78.6729	235.5	80.3855
															251.9	78.701	236	80.3977
[truncated: 1,362 more rows]
[truncated: 7 more columns]
