# Supplementary material for: KIF2C regulates synaptic plasticity and cognition in mice through dynamic microtubule depolymerization
Source: eLife. 2022 Feb 9;11:e72483. doi: 10.7554/eLife.72483 (PMC8828051; doi:10.7554/eLife.72483)
Supplement: Figure 3—source data 1. — Values for PPR ratio; Values for input-output curve of AMPAR and NMDAR mediated EPSCs between control and shkif2c neurons; Values for percentage changes of EPSCs amplitudes in control and shkif2c CA1 pyramidal neurons. [file elife-72483-fig3-data1.xlsx]

## Sheet: Sheet1
Figure 3–source data
		Figure3A						Figure3A				Figure3A						Figure3A				Figure3B							Figure3C				Figure3D
		mEPSC amplitude cumulative probability curves						Amplitude pA				mEPSC frequency cumulative probability curves						Frequency Hz					control		shKIF2C				%				stimulus intensity(μA)	control								shKIF2C
		control		shKIF2C				control	shKIF2C			control		shKIF2C				control	shKIF2C			interval(ms)	Mean	SEM	Mean	SEM			control	shKIF2C
		3.662	0.121359	4.272	0.119904			10.31	14.404			9.7	0.124224	2.7	0.121359			0.8258	3.2165			20	2.6359	0.181	2.5981	0.2186			53.414	16.89			25	10.7049	-5.71865	-15.6569	-10.5053	6.69283	7.01011	-8.33279	8.77019	8.07366	7.87545	-8.81974	8.11119	12.0034	6.31407	-6.69294	6.00427
		4.272	0.364078	4.883	0.359712			10.522	14.514			19.6	0.248447	10.6	0.242718			0.5288	2.4718			40	2.3091	0.1761	2.3783	0.1186			14.483	15.82			30	41.0558	18.1261	40.3914	67.328	81.7346	48.2522	26.3864	20.4038	28.6696	14.5239	16.5365	26.5406	69.1084	19.607	43.7433	27.2246
		4.883	0.970874	5.493	1.55875			13.029	12.927			27.4	0.372671	15.9	0.364078			1.0757	2.4171			60	2.1106	0.1395	2.291	0.1181			59.946	14.478			35	59.7939	71.6391	98.3111	173.2	133.724	105.478	104.404	119.602	71.025	19.8626	100.53	48.8852	259.14	108.664	97.2927	140.193
		5.493	1.69903	6.104	3.11751			11.366	12.271			30.3	0.496894	16.1	0.485437			2.5555	0.302			80	2.0557	0.0908	2.0187	0.1209			27.83	25.871			40	88.8245	107.261	191.557	228.524	153.655	316.512	214.199	367.012	170.775	59.358	330.709	59.7632	431.981	155.157	348.747	247.515
		6.104	3.2767	6.714	5.7554			10.498	12.958			31.7	0.621118	19.3	0.606796			4.4122	2.4463			100	1.8308	0.0916	1.8722	0.1447			22.639	23.603			45	97.5777	99.6925	345.379	238.516	307.965	429.306	220.899	552.615	250.561	111.279	412.624	76.4088	588.048	182.743	402.508	329.66
		6.714	6.91748	7.324	10.1918			10.876	12.101			35.1	0.745342	20.5	0.728155			0.7454	1.6375			150	1.6888	0.0619	1.5632	0.1602			45.138	41.997			50	102.817	117.41	384.636	266.793	446.793	600.225	253.908	596.058	330.439	121.661	653.46	87.936	700.581	188.619	403.599	365.748
		7.324	12.8641	7.935	17.0264			12.73	15.491			36.9	0.869565	21.7	0.849515			0.7649	1.064			200	1.4607	0.1024	1.3855	0.1241			39.924	27.689
		7.935	20.267	8.545	20.7434			13.373	13.127			37.8	0.993789	24.6	0.970874			1.7669	1.5178			300	1.2316	0.0857	1.2385	0.1081			22.105	55.405
		8.452	20.3883	9.155	26.6187			11.246	11.441			37.9	1.11801	25.1	1.09223			1.2772	3.5622			400	1.2398	0.0623	1.1963	0.0942			25.34	43.019
		8.545	27.6699	9.766	34.1727			11.342	12.04			40.1	1.24224	26	1.21359			4.3661	2.859										20.498	26.354
		9.155	36.6505	10.376	39.2086							41	1.36646	26.7	1.33495														35.377	25.236
		9.297	36.7718	10.986	46.4029							42.9	1.49068	27.2	1.45631														56.441	39.108
		9.766	45.6311	11.597	51.0791							50.9	1.61491	28.2	1.57767														34.711	46.369
		10.142	45.7524	12.207	55.036							51.5	1.73913	33	1.69903														28.933	23.984
		10.376	53.1553	12.817	59.952							56.3	1.86335	34	1.82039														52.755	31.221
		10.986	59.7087	13.428	63.5492							57.5	2.1118	34.1	1.94175														38.559	41.077
		11.597	65.0485	14.038	66.7866							60	2.23602	37.7	2.06311														40.925	33.207
		12.207	69.1748	14.648	70.7434							64.2	2.36025	40.1	2.18447														69.909	44.486
		12.817	73.9078	15.259	72.542							68	2.48447	43.2	2.30583														64.931	31.255
		13.428	77.6699	15.493	72.7818							69.1	2.6087	47	2.42718														43.148	2.6559
		14.038	80.7039	15.869	75.1799							72.7	2.73292	48.2	2.54854														27.732	1.0508
		14.648	82.5243	16.104	75.5396							73.3	2.85714	48.3	2.6699														40.682
		15.259	83.4951	16.479	78.8969							73.9	2.98137	52.1	2.79126
		15.869	85.1942	16.714	79.976							74.5	3.10559	52.2	2.91262
		16.011	85.3155	17.09	81.6547							77	3.22981	55.8	3.03398
		16.245	85.4369	17.324	81.8945							77.4	3.35404	64.2	3.15534
		16.479	87.7427	17.7	83.5731							81.1	3.47826	65.7	3.2767
		16.621	87.8641	17.935	83.9329							88.1	3.60248	67.8	3.39806
		16.855	87.9854	18.311	86.5707							94.3	3.72671	68.1	3.51942
		17.09	89.5631	18.545	86.8106							96.5	3.85093	70.6	3.64078
		17.466	89.6845	18.921	88.2494							99.9	3.97516	71.1	3.76214
		17.7	90.6553	19.155	88.3693							102.3	4.09938	71.5	3.8835
		18.311	91.7476	19.531	89.4484							107.2	4.2236	72.9	4.00485
		18.687	91.8689	20.142	90.2878							120.9	4.34783	75.8	4.12621
		18.921	92.7184	20.752	91.1271							122.3	4.47205	76.1	4.24757
		19.531	93.0825	21.362	92.0863							123.7	4.59627	77.7	4.36893
		20.142	94.1748	21.973	92.5659							124.7	4.7205	78.9	4.49029
		20.752	95.1456	22.583	93.1655							124.8	4.84472	82.3	4.61165
		21.362	95.6311	23.193	93.5252							126.7	4.96894	82.5	4.73301
		21.973	96.1165	23.804	94.1247							127.1	5.09317	86.2	4.85437
		22.583	96.7233	24.414	94.3645							129.8	5.21739	94.3	4.97573
		23.193	97.8155	24.883	94.7242							134.9	5.34161	102.8	5.09709
		23.804	98.0583	25.024	95.2038							137.1	5.46584	103.7	5.21845
		24.414	98.4223	25.493	95.3237							137.6	5.59006	105.6	5.33981
		25.024	98.5437	25.635	95.5635							143.9	5.71429	110.7	5.46117
		26.245	98.7864	26.245	95.6835							145.5	5.83851	112.2	5.58252
		26.855	98.9078	26.855	96.1631							150.4	5.96273	113	5.70388
		27.466	99.1505	28.076	96.5228							155.4	6.08696	116.6	5.82524
		28.687	99.2718	28.687	96.8825							161.4	6.21118	120.2	5.9466
		29.297	99.3932	29.297	97.2422							166.2	6.3354	120.4	6.06796
		30.518	99.5146	29.907	97.3621							169.5	6.45963	128.2	6.18932
		31.128	99.6359	30.518	97.6019							174.6	6.58385	128.3	6.31068
		34.79	99.7573	31.128	97.9616							174.9	6.70807	130.5	6.43204
		36.011	99.8786	31.738	98.2014							176	6.95652	133.8	6.5534
		42.725	100	32.959	98.3213							178.4	7.08075	136.5	6.67476
				34.18	98.5612							180.7	7.20497	137.2	6.79612
				35.4	98.6811							182.1	7.32919	140.5	6.91748
				36.011	98.9209							184.3	7.45342	147.8	7.03883
				36.621	99.2806							187.1	7.57764	151.7	7.16019
				37.231	99.4005							189.6	7.70186	154.1	7.28155
				37.842	99.5204							194.8	7.82609	154.7	7.40291
				38.452	99.6403							194.9	7.95031	159.1	7.52427
				40.283	99.7602							206	8.07453	159.5	7.64563
				42.114	100							210.3	8.19876	161.8	7.76699
												218.7	8.32298	164	7.88835
												221.4	8.4472	170.7	8.00971
												224.1	8.57143	172.1	8.13107
												227.2	8.69565	174.6	8.25243
												230.2	8.81988	174.9	8.37379
												235.6	8.9441	178.2	8.49515
												244.2	9.06832	181.4	8.6165
												250.2	9.19255	181.9	8.73786
												252.1	9.31677	189.2	8.85922
												253.2	9.44099	190.7	8.98058
												258.9	9.56522	195.9	9.10194
												259.2	9.68944	196.4	9.2233
												266.9	9.81366	196.5	9.34466
												271.9	9.93789	199.1	9.46602
												272.4	10.0621	199.5	9.58738
												276.1	10.1863	205.5	9.70874
												276.9	10.3106	207.4	9.8301
												287	10.4348	213.5	9.95146
												288.3	10.559	215	10.0728
												288.8	10.6832	215.2	10.1942
												289.8	10.8075	216.6	10.4369
												292.1	10.9317	219	10.5583
												293.8	11.0559	224.8	10.6796
												294.2	11.1801	227.4	10.801
												297.1	11.3043	228.1	10.9223
												297.6	11.4286	232.6	11.0437
												298.5	11.5528	233.9	11.165
												300.8	11.677	246.4	11.2864
												311.8	11.8012	252.2	11.4078
												313	11.9255	254	11.5291
												313.8	12.0497	254.1	11.6505
												315.5	12.1739	260.2	11.7718
												316.2	12.2981	274.5	11.8932
												316.8	12.4224	281.3	12.0146
												323.3	12.5466	293.2	12.1359
												325.3	12.6708	296.6	12.2573
												329.1	12.795	306.5	12.3786
												336.5	13.0435	313.2	12.5
												353.7	13.1677	319.5	12.6214
												358.1	13.2919	321.6	12.7427
												363.4	13.4161	324.6	12.8641
												364.9	13.5404	331.3	12.9854
												365.3	13.6646	333.6	13.1068
												368	13.7888	334.3	13.2282
												368.8	13.913	345.9	13.3495
												370.4	14.0373	346.6	13.4709
												372.1	14.1615	349.4	13.5922
												374.2	14.2857	352.2	13.7136
												376.7	14.4099	352.6	13.835
												383.6	14.5342	357.3	13.9563
												386.6	14.6584	362.4	14.0777
												391.3	14.7826	364.4	14.199
												394.7	14.9068	372.1	14.3204
												396.6	15.0311	375.7	14.4417
												403.8	15.1553	384.4	14.5631
												412.1	15.2795	386.4	14.6845
												420.1	15.4037	398.1	14.8058
												427	15.528	407	14.9272
												433.1	15.6522	408.6	15.0485
												435.5	15.7764	411.2	15.1699
												439.1	15.9006	418.9	15.2913
												439.8	16.0248	426	15.4126
												442.8	16.1491	427.4	15.534
												443.9	16.2733	428.1	15.6553
												460.1	16.3975	428.4	15.7767
												463.1	16.5217	433	15.8981
												467.8	16.646	439.9	16.0194
												474.2	16.7702	443.2	16.1408
												479.4	16.8944	443.4	16.2621
												490.5	17.0186	446.8	16.3835
												490.6	17.1429	450.8	16.5049
												495.1	17.2671	455.8	16.6262
												497	17.3913	463.7	16.7476
												500.7	17.5155	464	16.8689
												506.3	17.6398	465.6	16.9903
												512.8	17.764	467.4	17.1117
												520.8	17.8882	475.6	17.233
												540	18.0124	478.7	17.3544
												540.3	18.1366	482.4	17.4757
												546.1	18.2609	485.7	17.5971
												550	18.3851	487.5	17.7184
												550.9	18.5093	488	17.8398
												557.4	18.6335	491.1	17.9612
												558	18.7578	496.9	18.0825
												558.1	18.882	502.7	18.2039
												560.7	19.0062	504.4	18.3252
												575.4	19.1304	506.2	18.4466
												578.1	19.2547	510.4	18.568
												590.6	19.3789	511.3	18.6893
												595.7	19.5031	530.5	18.8107
												608.4	19.6273	532.9	18.932
												614.3	19.7516	536.5	19.0534
												631.9	19.8758	540.9	19.1748
												632.4	20	545.8	19.2961
												633	20.1242	548.7	19.4175
												639.8	20.2484	553	19.5388
												642.2	20.3727	563.6	19.6602
												643.5	20.4969	570.1	19.7816
												648.1	20.6211	572.9	19.9029
												656.8	20.7453	578	20.0243
												661.3	20.8696	590.5	20.1456
												666.8	20.9938	594	20.267
												670.3	21.118	603.3	20.3883
												671.2	21.2422	604.4	20.5097
												677.4	21.3665	606.1	20.6311
												679.2	21.4907	606.8	20.7524
												679.4	21.6149	620.8	20.8738
												686.8	21.7391	621.7	20.9951
												687.7	21.8634	623.4	21.1165
												694.9	21.9876	630.4	21.2379
												695.9	22.1118	630.5	21.3592
												696.4	22.236	632.7	21.4806
												699.4	22.3602	633.1	21.6019
												710.2	22.4845	643.8	21.7233
												712.3	22.6087	644.4	21.8447
												714.1	22.7329	647.2	21.966
												717.6	22.8571	653	22.0874
												721.8	23.1056	653.5	22.2087
												728.4	23.2298	655.8	22.3301
												730.3	23.354	663.9	22.4515
												734.9	23.4783	667.9	22.5728
												737.5	23.6025	668.6	22.6942
												759.1	23.7267	673.1	22.8155
												761.1	23.8509	675.2	22.9369
												771	23.9752	683.5	23.0583
												774.2	24.0994	684.5	23.1796
												778.7	24.2236	686.9	23.301
												780.8	24.3478	690.2	23.4223
												782.9	24.472	690.5	23.5437
												790.6	24.5963	694.1	23.665
												792.4	24.7205	703.3	23.7864
												793.9	24.8447	715.8	23.9078
												795.7	24.9689	718	24.0291
												797.2	25.0932	727.1	24.1505
												801.7	25.2174	729.1	24.2718
												806	25.3416	729.6	24.3932
												812.3	25.4658	730.5	24.5146
												815.2	25.5901	737	24.6359
												834.1	25.7143	742.3	24.7573
												853.5	25.8385	747.7	24.8786
												857	25.9627	752.1	25
												867.6	26.087	753.4	25.1214
												884.2	26.2112	754.2	25.2427
												890.8	26.3354	760.9	25.3641
												895.2	26.4596	761.6	25.4854
												895.7	26.5839	764.2	25.6068
												897.1	26.7081	765.6	25.7282
												908.8	26.8323	766.5	25.8495
												911.6	26.9565	770.6	25.9709
												934.4	27.0807	771.2	26.0922
												950.7	27.205	772.1	26.335
												964.1	27.3292	773.2	26.4563
												970.3	27.4534	774.9	26.5777
												971.2	27.5776	777.4	26.699
												982.4	27.7019	779.8	26.8204
												986.3	27.8261	781.9	26.9417
												990.1	27.9503	784.8	27.0631
												991.2	28.0745	784.9	27.1845
												1000	28.1988	797.8	27.3058
												1002.8	28.323	798.2	27.4272
												1005.4	28.4472	800.2	27.5485
												1017.7	28.5714	801	27.6699
												1017.8	28.6957	803.6	27.7913
												1022	28.9441	807.3	27.9126
												1025.9	29.0683	815.1	28.034
												1027.8	29.1925	825.9	28.1553
												1029.6	29.3168	832	28.2767
												1035.2	29.441	843.5	28.3981
												1036.2	29.5652	848.6	28.5194
												1045.6	29.6894	848.9	28.6408
												1056	29.8137	856.6	28.7621
												1068.5	29.9379	857.1	28.8835
												1077	30.0621	865.9	29.0049
												1082.1	30.1863	871.9	29.1262
												1086.6	30.3106	874.7	29.2476
												1094.3	30.4348	876.6	29.3689
												1103	30.559	878.2	29.4903
												1105.2	30.6832	886.2	29.6117
												1112	30.8075	887.9	29.733
												1118.9	30.9317	888.6	29.8544
												1124.3	31.0559	893.3	29.9757
												1127.2	31.1801	899	30.0971
												1130.2	31.3043	900.2	30.2184
												1134.6	31.4286	900.9	30.3398
												1143.6	31.5528	902.5	30.4612
												1149	31.677	904.3	30.5825
												1158.2	31.8012	910	30.7039
												1171.3	31.9255	919.5	30.8252
												1181.5	32.0497	927.9	30.9466
												1193.6	32.1739	929.8	31.068
												1204.1	32.2981	942.7	31.1893
												1216.4	32.4224	944.7	31.3107
												1218	32.5466	945.2	31.432
												1225.3	32.6708	947.4	31.5534
												1230.5	32.795	948	31.6748
												1233.2	32.9193	952.9	31.7961
												1233.8	33.0435	953.7	31.9175
												1267.8	33.1677	958.7	32.0388
												1278	33.2919	959.7	32.1602
												1313.6	33.4161	961	32.2816
												1314	33.5404	965.5	32.4029
												1315.6	33.6646	965.7	32.5243
												1321	33.7888	971.4	32.6456
												1325.4	33.913	972.8	32.767
												1327.8	34.0373	975.3	32.8883
												1337.2	34.1615	990.5	33.0097
												1352.6	34.2857	999.9	33.1311
												1357.4	34.4099	1011.1	33.2524
												1358.2	34.5342	1041.6	33.3738
												1377.7	34.6584	1047.4	33.4951
												1381.2	34.7826	1053	33.6165
												1400.8	34.9068	1056.4	33.7379
												1412.3	35.0311	1057.6	33.8592
												1423.9	35.1553	1063.6	33.9806
												1428.5	35.2795	1076.2	34.1019
												1442.9	35.4037	1078.4	34.2233
												1443.1	35.528	1079.9	34.3447
												1455.9	35.6522	1080.7	34.466
												1459.8	35.7764	1088.7	34.5874
												1474.7	35.9006	1096.6	34.7087
												1479.2	36.0248	1101.6	34.8301
												1495.5	36.1491	1110.2	34.9515
												1502.1	36.2733	1113.8	35.0728
												1507.7	36.3975	1122.4	35.1942
												1511.2	36.5217	1122.5	35.3155
												1512.9	36.646	1131.6	35.4369
												1517.1	36.7702	1135.1	35.5583
												1531.2	36.8944	1144.1	35.6796
												1548	37.0186	1150.9	35.801
												1550.4	37.1429	1162.2	35.9223
												1554.3	37.2671	1164.4	36.0437
												1559.2	37.3913	1166.3	36.165
												1562.1	37.5155	1167.8	36.2864
												1562.3	37.6398	1168.3	36.4078
												1566.7	37.764	1175.6	36.5291
												1567.9	37.8882	1178.6	36.6505
												1587.8	38.0124	1183.4	36.7718
												1602.3	38.1366	1186.3	36.8932
												1609.5	38.2609	1186.4	37.0146
												1610	38.3851	1192.9	37.1359
												1612.4	38.5093	1198.9	37.2573
												1615.2	38.6335	1211.5	37.3786
												1617.7	38.7578	1218.7	37.5
												1624.3	38.882	1230.1	37.6214
												1652.7	39.0062	1232	37.7427
												1658.5	39.1304	1240.4	37.8641
												1658.7	39.2547	1246.5	37.9854
												1676.4	39.3789	1257.1	38.1068
												1679.7	39.5031	1267.3	38.2282
												1692.1	39.6273	1274.8	38.3495
												1692.8	39.7516	1276.6	38.4709
												1695.3	39.8758	1279.4	38.5922
												1719.2	40	1281.7	38.7136
												1727.3	40.1242	1286.8	38.835
												1730.6	40.2484	1288.3	38.9563
												1735.9	40.3727	1296.5	39.0777
												1737.5	40.4969	1303.9	39.199
												1753.6	40.6211	1307.1	39.3204
												1759.1	40.7453	1313	39.4417
												1768.6	40.8696	1322.1	39.5631
												1769.8	40.9938	1322.3	39.6845
												1795.6	41.118	1327	39.8058
												1799	41.2422	1327.3	39.9272
												1799.1	41.3665	1330.1	40.0485
												1799.9	41.4907	1336.7	40.1699
												1809.4	41.6149	1344.2	40.4126
												1815.3	41.7391	1345.5	40.534
												1820.3	41.8634	1351.4	40.6553
												1823.4	41.9876	1354.9	40.7767
												1841.2	42.1118	1359.4	40.8981
												1849.4	42.236	1362.1	41.0194
												1850.2	42.3602	1363.6	41.1408
												1857.2	42.4845	1365.2	41.2621
												1880.6	42.6087	1367.5	41.3835
												1908.1	42.7329	1379	41.5049
												1917.3	42.8571	1383.7	41.6262
												1920.7	42.9814	1386.3	41.8689
												1943.8	43.1056	1388.8	41.9903
												1952.3	43.2298	1391.4	42.1117
												1964.8	43.354	1395.3	42.233
												1968.7	43.6025	1396.5	42.3544
												1980.9	43.7267	1398.8	42.4757
												2010.5	43.8509	1401.4	42.5971
												2023.7	43.9752	1408.9	42.7184
												2033.3	44.0994	1414	42.8398
												2036.2	44.2236	1425.2	42.9612
												2036.6	44.3478	1425.7	43.0825
												2037.7	44.472	1432.5	43.2039
												2054.8	44.5963	1434.5	43.3252
												2059.6	44.7205	1438.1	43.4466
												2071.6	44.8447	1445.7	43.568
												2123.4	44.9689	1456	43.6893
												2123.8	45.0932	1457.1	43.8107
												2127.5	45.2174	1489.3	43.932
												2132.8	45.3416	1501.1	44.0534
												2143.5	45.4658	1506.7	44.1748
												2144.1	45.5901	1515.1	44.2961
												2148.6	45.7143	1523.3	44.4175
												2167.5	45.8385	1524.1	44.5388
												2187.9	45.9627	1533.3	44.6602
												2188.6	46.087	1533.7	44.7816
												2190.3	46.2112	1542.7	44.9029
												2211.9	46.3354	1553.2	45.0243
												2240.1	46.4596	1553.6	45.1456
												2247.4	46.5839	1553.9	45.267
												2259.2	46.7081	1559.7	45.3883
												2276.6	46.8323	1561.2	45.5097
												2282.9	46.9565	1570.5	45.6311
												2290.9	47.0807	1576.6	45.7524
												2295.8	47.205	1579.8	45.8738
												2323.5	47.3292	1584.5	45.9951
												2329.9	47.4534	1613.3	46.1165
												2344.2	47.5776	1615.2	46.2379
												2347.2	47.7019	1619	46.3592
												2355.5	47.8261	1624.9	46.4806
												2368.4	47.9503	1625.8	46.6019
												2384.1	48.0745	1626.7	46.7233
												2386	48.1988	1631.5	46.8447
												2394.2	48.323	1632.8	46.966
												2397.5	48.4472	1650.9	47.0874
												2413.1	48.5714	1652.3	47.2087
												2426.9	48.6957	1653.4	47.3301
												2429.1	48.8199	1670.2	47.4515
												2435.7	48.9441	1672.7	47.5728
												2436.1	49.0683	1678.1	47.6942
												2452.1	49.1925	1678.9	47.8155
												2458.8	49.3168	1683	47.9369
												2477.8	49.441	1687.7	48.0583
												2481.1	49.5652	1708.1	48.1796
												2482.1	49.6894	1717.9	48.301
												2483.4	49.8137	1743.8	48.4223
												2487	49.9379	1761.5	48.5437
												2497.1	50.0621	1762.2	48.665
												2515.4	50.1863	1770.9	48.7864
												2524.9	50.3106	1818.8	48.9078
												2530	50.4348	1840.2	49.0291
												2546.1	50.559	1842.1	49.1505
												2559.4	50.6832	1871.3	49.3932
												2578.9	50.8075	1887.2	49.5146
												2586.8	50.9317	1894.9	49.6359
												2590.4	51.0559	1898.2	49.7573
												2616.1	51.1801	1908.7	49.8786
												2624.9	51.3043	1908.8	50
												2634	51.4286	1914.6	50.1214
												2658.3	51.5528	1924.3	50.2427
												2666.6	51.677	1942.1	50.3641
												2673.7	51.8012	1948.7	50.4854
												2694.5	51.9255	1957.3	50.6068
												2694.9	52.0497	1979.3	50.7282
												2708.9	52.1739	1980.5	50.8495
												2714	52.2981	1992.3	50.9709
												2725.7	52.4224	1992.8	51.0922
												2726.2	52.5466	2000.3	51.2136
												2728.1	52.6708	2016.5	51.335
												2738.8	52.795	2020.4	51.4563
												2743.4	52.9193	2021.5	51.5777
												2788	53.0435	2027.7	51.699
												2791.9	53.1677	2029.3	51.8204
												2798.3	53.2919	2032.4	51.9417
												2805.2	53.4161	2063.2	52.0631
												2806.9	53.5404	2063.9	52.1845
												2834.6	53.6646	2065	52.3058
												2842.2	53.7888	2098.1	52.4272
												2848.4	53.913	2099.9	52.5485
												2861.5	54.0373	2108.2	52.6699
												2863.6	54.1615	2115.5	52.7913
												2871.5	54.2857	2165.6	52.9126
												2889.2	54.4099	2192.8	53.034
												2898.4	54.5342	2194.8	53.1553
												2905.8	54.6584	2200.4	53.2767
												2910.4	54.7826	2210.1	53.3981
												2912.1	54.9068	2217.7	53.5194
												2917	55.0311	2221.7	53.6408
												2922.5	55.1553	2222.9	53.7621
												2940.8	55.2795	2223.2	53.8835
												2948.9	55.4037	2226.3	54.0049
												2951.9	55.528	2230.6	54.1262
												2954.7	55.6522	2262.5	54.2476
												3001.8	55.7764	2264.1	54.3689
												3010.3	55.9006	2270.5	54.4903
												3029	56.0248	2283.3	54.6117
												3049.8	56.1491	2283.5	54.733
												3061.5	56.2733	2290	54.8544
												3066.4	56.3975	2297.5	54.9757
												3078.2	56.5217	2306.8	55.0971
												3080.2	56.646	2363.2	55.2184
												3085.5	56.7702	2363.9	55.3398
												3087.6	56.8944	2383.2	55.4612
												3097.1	57.0186	2391.7	55.5825
												3125.5	57.1429	2403.3	55.7039
												3129.8	57.2671	2406.2	55.8252
												3142.5	57.3913	2412.8	55.9466
												3149.3	57.5155	2425.6	56.068
												3155.9	57.6398	2446.2	56.1893
												3164	57.764	2472	56.3107
												3167.1	57.8882	2498.8	56.432
												3167.7	58.0124	2507.1	56.5534
												3177.7	58.1366	2531.7	56.6748
												3257.9	58.2609	2533.2	56.7961
												3260.8	58.3851	2555	56.9175
												3272.3	58.5093	2562	57.0388
												3283.8	58.6335	2595.5	57.1602
												3286.7	58.7578	2598.5	57.2816
												3306.1	58.882	2599.2	57.4029
												3316.4	59.0062	2603.4	57.5243
												3335.3	59.1304	2617.1	57.6456
												3350.8	59.2547	2619.7	57.767
												3351.8	59.3789	2633	57.8883
												3371.1	59.5031	2634.9	58.0097
												3397.6	59.6273	2643.9	58.1311
												3400.7	59.7516	2666.5	58.2524
												3413.9	59.8758	2666.9	58.3738
												3421.8	60	2673.4	58.4951
												3431.6	60.1242	2674.7	58.6165
												3454.7	60.2484	2725.7	58.7379
												3468.6	60.3727	2726.1	58.8592
												3493.7	60.4969	2742.1	58.9806
												3494.1	60.6211	2788.7	59.1019
												3505.1	60.7453	2796.9	59.2233
												3524.2	60.8696	2818.1	59.3447
												3559.3	60.9938	2856.5	59.466
												3602.3	61.118	2886.6	59.5874
												3605.7	61.2422	2903	59.7087
												3612.2	61.3665	2903.1	59.8301
												3635.3	61.4907	2910.6	59.9515
												3659.9	61.6149	2911.1	60.0728
												3660.2	61.7391	2927.2	60.1942
												3671.7	61.8634	2929.2	60.3155
												3685.7	61.9876	2959	60.4369
												3703.5	62.1118	2965.7	60.5583
												3707	62.236	2970.4	60.6796
												3744.9	62.3602	3004.8	60.801
												3793.9	62.4845	3010.8	60.9223
												3794.5	62.6087	3026.4	61.0437
												3833.2	62.7329	3036.9	61.165
												3841	62.8571	3042.4	61.2864
												3853.8	62.9814	3065.2	61.4078
												3860.5	63.1056	3072.1	61.5291
												3862.9	63.2298	3078	61.6505
												3929.7	63.354	3085.6	61.7718
												3933.2	63.4783	3097.1	61.8932
												3948.1	63.6025	3102.3	62.0146
												4023.6	63.7267	3104.8	62.1359
												4029.2	63.8509	3114	62.2573
												4030.3	63.9752	3127.9	62.3786
												4049.2	64.0994	3144.2	62.5
												4107.6	64.2236	3151.6	62.6214
												4116	64.3478	3161.6	62.7427
												4140.9	64.472	3193.2	62.8641
												4153.7	64.5963	3198.4	62.9854
												4160.3	64.7205	3203.2	63.1068
												4170.3	64.8447	3206.7	63.2282
												4172.4	64.9689	3208.5	63.3495
												4183.5	65.0932	3216.5	63.4709
												4207.7	65.2174	3259.1	63.5922
												4218.2	65.3416	3290.9	63.7136
												4250.9	65.4658	3296.7	63.835
												4284.1	65.5901	3305.2	63.9563
												4285.6	65.7143	3325.5	64.0777
												4285.7	65.8385	3332.7	64.199
												4306.3	65.9627	3389	64.3204
												4307.1	66.087	3395.5	64.4417
												4315.1	66.2112	3480.3	64.5631
												4325.3	66.3354	3489.9	64.6845
												4345.9	66.4596	3494.2	64.8058
												4369.8	66.5839	3496	64.9272
												4403.6	66.7081	3524.1	65.0485
												4419	66.8323	3536.6	65.1699
												4452.9	66.9565	3555.4	65.2913
												4454.5	67.0807	3588.9	65.4126
												4474.5	67.205	3593	65.534
												4477.5	67.3292	3623.7	65.6553
												4478.5	67.4534	3633.3	65.7767
												4495.8	67.5776	3634.7	65.8981
												4521.5	67.7019	3648.5	66.0194
												4549.1	67.8261	3671.2	66.1408
												4562.1	67.9503	3675	66.2621
												4567.6	68.0745	3679	66.3835
												4594.4	68.1988	3689.7	66.5049
												4611.5	68.323	3698.3	66.6262
												4629.6	68.4472	3714	66.7476
												4646.5	68.5714	3722.9	66.8689
												4742	68.6957	3728.5	66.9903
												4752	68.8199	3737.5	67.1117
												4834.6	68.9441	3739.3	67.233
												4863.5	69.0683	3742.9	67.3544
												4864	69.1925	3770	67.4757
												4864.4	69.3168	3770.5	67.5971
												4915.6	69.441	3813.9	67.7184
												4944.4	69.5652	3818.4	67.8398
												4977.4	69.6894	3840.9	67.9612
												4993.8	69.8137	3846.7	68.0825
												4999.5	69.9379	3855.2	68.2039
												5023.2	70.0621	3865.9	68.3252
												5043	70.1863	3870	68.4466
												5045.8	70.3106	3872.6	68.568
												5083.3	70.4348	3900.1	68.6893
												5091.4	70.559	3913.2	68.8107
												5106	70.6832	4015.6	68.932
												5169	70.8075	4022.3	69.0534
												5174.2	70.9317	4039.7	69.1748
												5176.1	71.0559	4041.5	69.2961
												5178.9	71.1801	4046.6	69.4175
												5197.9	71.3043	4053.7	69.5388
												5211.3	71.4286	4085.1	69.6602
												5229.7	71.5528	4086.6	69.7816
												5240.7	71.677	4109.6	69.9029
												5249.7	71.8012	4114.5	70.0243
												5252.3	71.9255	4129.4	70.1456
												5269.2	72.0497	4133.2	70.267
												5308.8	72.1739	4137.6	70.3883
												5311.6	72.2981	4200.9	70.5097
												5328.6	72.4224	4242.8	70.6311
												5341.8	72.5466	4248	70.7524
												5343.5	72.6708	4249.7	70.8738
												5345.8	72.795	4253.2	70.9951
												5379.9	72.9193	4255.2	71.1165
												5382.7	73.0435	4270.7	71.2379
												5444.5	73.1677	4299.9	71.3592
												5446.6	73.2919	4319.3	71.4806
												5449.2	73.4161	4323.3	71.6019
												5461.9	73.5404	4341.3	71.7233
												5485.8	73.6646	4344	71.8447
												5575.6	73.7888	4363.7	71.966
												5576.8	73.913	4378.1	72.0874
												5600.6	74.0373	4382.1	72.2087
												5636.2	74.1615	4473.2	72.3301
												5663.4	74.2857	4479.8	72.4515
												5666	74.4099	4504.9	72.5728
												5668	74.5342	4521	72.6942
												5679.2	74.6584	4568	72.8155
												5681.1	74.7826	4570.7	72.9369
												5716.2	74.9068	4598.3	73.0583
												5773	75.0311	4644.5	73.1796
												5779	75.1553	4645.1	73.301
												5816.2	75.2795	4655.1	73.4223
												5870	75.4037	4665.8	73.5437
												5893.8	75.528	4748.8	73.665
												5912	75.6522	4771.6	73.7864
												5914.8	75.7764	4796.9	73.9078
												5921.1	75.9006	4802.7	74.0291
												5941.7	76.0248	4821.4	74.1505
												5965.2	76.1491	4821.7	74.2718
												5981	76.2733	4823.1	74.3932
												5988.5	76.3975	4877.9	74.5146
												5991.1	76.5217	4908.3	74.6359
												6050.9	76.646	4929.3	74.7573
												6076.8	76.7702	4933.5	74.8786
												6144.5	76.8944	4948.2	75
												6147.4	77.0186	4962.7	75.1214
												6161.1	77.1429	4974.3	75.2427
												6232.7	77.2671	4978.2	75.3641
												6233.8	77.3913	4992.1	75.4854
												6244.2	77.5155	4996.7	75.6068
												6268.2	77.6398	5034.3	75.7282
												6279	77.764	5044.9	75.8495
												6300.1	77.8882	5137.6	75.9709
												6312.3	78.0124	5148	76.0922
												6329.6	78.1366	5159.9	76.2136
												6334.1	78.2609	5162.3	76.335
												6375.8	78.3851	5164.9	76.4563
												6377.7	78.5093	5188.6	76.5777
												6414.3	78.6335	5207.7	76.699
												6423.3	78.7578	5223.2	76.8204
												6432.8	78.882	5235.7	76.9417
												6470.9	79.0062	5276.3	77.0631
												6473	79.1304	5286.9	77.1845
												6503.3	79.2547	5305.5	77.3058
												6552.2	79.3789	5413	77.4272
												6558.9	79.5031	5414.8	77.5485
												6619	79.6273	5424	77.6699
												6668.1	79.7516	5450.2	77.7913
												6694.6	79.8758	5460	77.9126
												6719	80	5481.3	78.034
												6719.8	80.1242	5499.7	78.1553
												6931.9	80.2484	5529.6	78.2767
												6972.1	80.3727	5539	78.3981
												7025.1	80.4969	5576.1	78.5194
												7031.5	80.6211	5612.7	78.6408
												7047.8	80.7453	5649	78.7621
												7061.8	80.8696	5662.9	78.8835
												7066.9	80.9938	5673	79.0049
												7097.7	81.118	5681.2	79.1262
												7109.1	81.2422	5695.5	79.2476
												7144.4	81.3665	5711.2	79.3689
												7197.4	81.4907	5772.3	79.4903
												7211.5	81.6149	5816.9	79.6117
												7285.3	81.7391	5823.2	79.733
												7315.8	81.8634	5825.4	79.8544
												7341.5	81.9876	5863.2	79.9757
												7399.6	82.1118	5900.8	80.0971
												7429.1	82.236	5965.2	80.2184
												7467.3	82.3602	5994.5	80.3398
												7468.8	82.4845	6010.8	80.4612
												7585.5	82.6087	6027.3	80.5825
												7663.3	82.7329	6049.4	80.7039
												7711.2	82.8571	6062.3	80.8252
												7728.2	82.9814	6100.5	80.9466
												7764.5	83.1056	6103.3	81.068
												7800.3	83.2298	6110.4	81.1893
												7801	83.354	6187.9	81.3107
												7835.3	83.4783	6188.2	81.432
												7870.2	83.6025	6194.6	81.5534
												7913.8	83.7267	6201	81.6748
												7954.5	83.8509	6258.1	81.7961
												7972.3	83.9752	6322.7	81.9175
												7985.7	84.0994	6344.5	82.0388
												8014.4	84.2236	6349.4	82.1602
												8057.6	84.3478	6383.1	82.2816
												8089.6	84.472	6442.8	82.4029
												8121.5	84.5963	6457.7	82.5243
												8140.2	84.7205	6562.4	82.6456
												8149.4	84.8447	6633.9	82.767
												8181.2	84.9689	6638.9	82.8883
												8184.2	85.0932	6651.7	83.0097
												8200.3	85.2174	6728	83.1311
												8243.8	85.3416	6797.1	83.2524
												8289.4	85.4658	6887.9	83.3738
												8361.3	85.5901	6897.2	83.4951
												8427.7	85.7143	6925.3	83.6165
												8435.7	85.8385	6928.8	83.7379
												8441.1	85.9627	6978.4	83.8592
												8563.6	86.087	7034.2	83.9806
												8608	86.2112	7063.6	84.1019
												8618.3	86.3354	7107.2	84.2233
												8670.6	86.4596	7117.3	84.3447
												8695.5	86.5839	7166.9	84.466
												8905.2	86.7081	7219.1	84.5874
												9087.5	86.8323	7250.7	84.7087
												9090.6	86.9565	7263.9	84.8301
												9104.8	87.0807	7271.9	84.9515
												9114.4	87.205	7345.4	85.0728
												9210.6	87.3292	7361.6	85.1942
												9221.9	87.4534	7363.5	85.3155
												9263.4	87.5776	7377.5	85.4369
												9297.5	87.7019	7422.6	85.5583
												9441.1	87.8261	7513.9	85.6796
												9494.2	87.9503	7529.7	85.801
												9720.1	88.0745	7559.1	85.9223
												9757.3	88.1988	7877.5	86.0437
												9811.8	88.323	7895.2	86.165
												9853.9	88.4472	7895.3	86.2864
												9995.9	88.5714	7929.4	86.4078
												10053.3	88.6957	7977.6	86.5291
												10085.5	88.8199	7990.9	86.6505
												10112.7	88.9441	8054.6	86.7718
												10219.9	89.0683	8141	86.8932
												10327.4	89.1925	8183.3	87.0146
												10385.6	89.3168	8252.5	87.1359
												10387.2	89.441	8289	87.2573
												10474.9	89.5652	8327.1	87.3786
												10495	89.6894	8457.8	87.5
												10527.8	89.8137	8537.7	87.6214
												10585.9	89.9379	8542	87.7427
												10655.2	90.0621	8595.5	87.8641
												10818.7	90.1863	8697.5	87.9854
												10907.8	90.3106	8728.3	88.1068
												11028.6	90.4348	8844.9	88.2282
												11065.7	90.559	8956	88.3495
												11094.3	90.6832	8960	88.4709
												11201.8	90.8075	9012.3	88.5922
												11298.4	90.9317	9046.2	88.7136
												11357.7	91.0559	9179.2	88.835
												11572.6	91.1801	9276.3	88.9563
												11611	91.3043	9291.8	89.0777
												11715.3	91.4286	9324	89.199
												11789.9	91.5528	9378.6	89.3204
												11797.6	91.677	9482.5	89.4417
												12094.8	91.8012	9492.6	89.5631
												12126.5	91.9255	9504.7	89.6845
												12375.8	92.0497	9536.7	89.8058
												12547.7	92.1739	9653.2	89.9272
												12864.6	92.2981	9656.5	90.0485
												13058.5	92.4224	9668.1	90.1699
												13122.2	92.5466	9671.6	90.2913
												13487.8	92.6708	9761.6	90.4126
												13528.3	92.795	9773.2	90.534
												13647.2	92.9193	9886.7	90.6553
												13660.8	93.0435	9893.2	90.7767
												13732.5	93.1677	9954.2	90.8981
												13995.6	93.2919	10012.4	91.0194
												14276.7	93.4161	10131.7	91.1408
												14426	93.5404	10179.5	91.2621
												14499.7	93.6646	10256	91.3835
												14669.1	93.7888	10549.9	91.5049
												14704.9	93.913	10608	91.6262
												14714	94.0373	10626.3	91.7476
												15082.1	94.1615	10682.7	91.8689
												15129.7	94.2857	10768.8	91.9903
												15212.2	94.4099	10892	92.1117
												15231.7	94.5342	10898.4	92.233
												15365.7	94.6584	11008.7	92.3544
												15574.4	94.7826	11030.9	92.4757
												16009.8	94.9068	11095.8	92.5971
												16052.4	95.0311	11321.1	92.7184
												16218.4	95.1553	11570.9	92.8398
												16459.4	95.2795	11775.9	92.9612
												16788.8	95.4037	11862	93.0825
												16832.9	95.528	11900.9	93.2039
												17206.3	95.6522	11948.2	93.3252
												17212.4	95.7764	12402.5	93.4466
												17246	95.9006	12417.7	93.568
												17382.9	96.0248	12518.9	93.6893
												17621.3	96.1491	12670.5	93.8107
												17670.4	96.2733	12676.3	93.932
												17988.7	96.3975	13020	94.0534
												18012.5	96.5217	13350.8	94.1748
												18289.2	96.646	13641.7	94.2961
												18440	96.7702	13668.4	94.4175
												18457.9	96.8944	13869.3	94.5388
												18958.4	97.0186	14016	94.6602
												19332.5	97.1429	14074.8	94.7816
												19415.7	97.2671	14126.9	94.9029
												20077.3	97.3913	14243.5	95.0243
												20231.7	97.5155	14303.1	95.1456
												20743.9	97.6398	14514.7	95.267
												21090.3	97.764	14562.8	95.3883
												21462.5	97.8882	14662.5	95.5097
												21552.3	98.0124	14710.4	95.6311
												22810.6	98.1366	15036.8	95.7524
												22983.5	98.2609	15229.1	95.8738
												23456.7	98.3851	15235.2	95.9951
												23851.5	98.5093	15245.9	96.1165
												23964.8	98.6335	15460.8	96.2379
												24868.6	98.7578	15496.4	96.3592
												26653	98.882	15674.5	96.4806
												27158.1	99.0062	15992.2	96.6019
												27367.6	99.1304	16139.7	96.7233
												27392.9	99.2547	16498.9	96.8447
												28167.9	99.3789	16725.1	96.966
												28399	99.5031	16738.7	97.0874
												28622.9	99.6273	16897	97.2087
												32462.2	99.7516	16969.5	97.3301
												35801.8	99.8758	17475.8	97.4515
												37070.6	100	18001.7	97.5728
														18371	97.6942
														18932.5	97.8155
														19148.8	97.9369
														19955.3	98.0583
														20547	98.1796
														21715.3	98.301
														21738.5	98.4223
														22113.4	98.5437
														22174.4	98.665
														22289.7	98.7864
														22320.1	98.9078
														22699.4	99.0291
														22731.5	99.1505
														23771.7	99.2718
														27913.2	99.3932
														29646.2	99.5146
														31350.4	99.6359
														32079.6	99.7573
														33628.6	99.8786
														44236.8	100
