# Supplementary material for: KIF2C regulates synaptic plasticity and cognition in mice through dynamic microtubule depolymerization
Source: eLife. 2022 Feb 9;11:e72483. doi: 10.7554/eLife.72483 (PMC8828051; doi:10.7554/eLife.72483)
Supplement: Figure 4—figure supplement 1—source data 1. [file elife-72483-fig4-figsupp1-data1.xlsx]

## Sheet: Sheet1
Figure4- figure supplement1- source data1
Figure S1B				FigureS1C				FigureS1C
WT	cKO			body weight(g)				brain weight(g)
93.8614	6.46415			WT	cKO			WT	cKO
102.712	4.73203			23.8	22.8			0.46	0.44
103.426	6.15799			24.2	24.2			0.5	0.43
105.347	5.15358			21.6	23.9			0.42	0.47
94.6535	7.56156			19.9	23.4			0.48	0.44
				22.8	24.1			0.43	0.49
				22.6	19.7			0.47	0.41
				24.6	22.7			0.41	0.4
				23.9	23.7			0.45	0.49
				24.5	22.7
				19.8	20.8
