# Supplementary material for: KIF2C regulates synaptic plasticity and cognition in mice through dynamic microtubule depolymerization
Source: eLife. 2022 Feb 9;11:e72483. doi: 10.7554/eLife.72483 (PMC8828051; doi:10.7554/eLife.72483)
Supplement: Figure 4—source data 1. [file elife-72483-fig4-data1.xlsx]

## Sheet: Sheet1
Figure 4–source data
	Figure4B				Figure4B				Figure4D																							Figure4E				Figure4F										Figure4H
	CA1 μm				CA3 μm				μm																							spine density/μm				mushroom		filopodia		stubby		thin				length nm
	WT	cKO			WT	cKO			WT									cKO														WT	cKO			WT	cKO	WT	cKO	WT	cKO	WT	cKO			WT	cKO
	44.171	46.061			149.834	111.099			10	4.765	5.003	3.914	5.946	3.882	3.997	5.002	3.959	4.969	4.715	4.795	3.031	4.994	4.978	4.984	4.854	6.07	3.144	3.793	3.793			0.948213	1.01437			0.291758	0.141539	0.145879	0.141539	0.182349	0.11795	0.328228	0.259489			286.746	249.199
	43.4653	52.807			125.033	111.505			20	6.858	10.01	7.467	6.328	7.337	7.967	9.023	7.296	5.256	6.229	7.636	7.672	9.068	8.14	10.13	9.934	6.821	6.48	5.406	5.406			1.00286	1.3672			0.429799	0.218753	0.119389	0.382817	0.143266	0.246097	0.310411	0.355473			217.717	224.168
	47.5433	48.8497			116.037	118.212			30	11.587	12.838	11.145	13.24	12.058	12.14	10.758	13.119	8.258	8.398	8.965	11.132	15.719	9.653	16.576	11.724	12.772	12.373	11.248	11.248			0.906481	0.867811			0.32734	0.195257	0.1259	0.195257	0.1259	0.108476	0.32734	0.282038			172.094	281.894
	45.0767	47.9727			131.072	115.741			40	16.289	15.567	13.293	15.683	13.924	14.06	13.85	14.351	10.812	9.178	12.248	17.279	17.5	12.359	19.684	13.32	18.207	16.585	16.372	16.372			0.858912	0.895866			0.316441	0.255962	0.045206	0.127981	0.237714	0.085321	0.345767	0.383943			279.968	226.948
	47.5323	49.8283			110.473	120.489			50	19.5	18.111	14.844	14.254	15.076	14.234	17.442	14.031	12.11	8.7	15.514	20.848	18.786	15.044	19.516	14.866	20.707	18.024	19.042	19.042			0.994079	1.71635			0.302546	0.265626	0.108052	0.408655	0.215604	0.204328	0.51206	0.347357			493.683	163.141
	51.3037	55.087			128.148	137.473			60	20.717	19.552	16.347	11.891	16.022	13.527	19.615	13.912	12.308	7.73	16.519	19.936	18.349	15.566	17.941	15.531	20.248	17.154	19.25	19.25			1.34753	1.17101			0.458159	0.250931	0.161703	0.334574	0.126024	0.250931	0.693132	0.334574			248.912	205.602
	49.8967	55.1843			122.222	133.703			70	20.1	19.141	17.356	10.039	15.59	12.295	19.15	12.764	11.791	6.891	14.654	16.341	14.277	13.216	16.236	14.744	18.016	14.969	17.732	17.732			1.32325	0.988924			0.31506	0.173062	0.189036	0.3214	0.196091	0.123616	0.457546	0.370847			483.913	199.283
	54.9617	52.329			125.453	133.397			80	18.17	16.852	16.969	8.402	13.159	10.463	16.04	9.371	10.88	6.401	10.922	11.976	8.919	9.373	14.137	12.668	15.346	12.414	15.377	15.377			1.00224	0.625036			0.261455	0.132583	0.087152	0.151524	0.077824	0.075762	0.252928	0.265167			284.322	323.221
	52.959	53.2793			135.353	122.035			90	15.549	13.425	14.661	6.428	9.797	7.968	11.213	5.233	9.776	6.127	7.02	6.803	5.496	6.381	10.553	10.042	13.022	10.11	12.907	12.907			0.87552	1.51421			0.311296	0.341231	0.233472	0.255924	0.065614	0.298577	0.371812	0.618482			236.97	329.753
	46.514	48.6767			107.668	114.447			100	12.77	9.979	10.806	4.665	7.142	5.119	5.888	1.966	8.615	5.776	4.298	0.968	1.882	5.402	5.353	7.636	11.078	8.311	10.765	10.765			0.918595	1.0695			0.32807	0.24215	0.153099	0.302688	0.343171	0.181613	0.571951	0.343046			492.496	279.33
	49.2177	52.5377			119.32	118.528			110	10.171	7.324	6.603	4.152	5.128	2.657	1.019		7.514	5.112	3.12	1.014	1.011	4.871	0.873	5.662	9.051	6.977	9.117	9.117			1.2011	0.810098			0.171585	0.226074	0.11439	0.094197	0.12734	0.131876	0.44569	0.35795			241.176	259.143
	48.3053	48.39			129.395	128.034			120	7.881	5.229	3.431	1.973	1.843	1.437			6.584	4.099	2.848			2.017	1.018	3.633	6.55	5.913	7.923	7.923			1.12484	0.997468			0.403243	0.255761	0.148563	0.255761	0.068421	0.051152	0.501756	0.434794			260.456	361.812
	51.1447	41.8833			151.79	166.092			130	5.88	1.968	1.933		1.042	1.852			5.868	2.939	2.447					1.262	3.818	4.913	7.027	7.027			1.02632	0.829503			0.205264	0.269028	0.250878	0.112095	0.118411	0.156933	0.355233	0.291447			301.227	259.013
	48.7837	46.8863			115.134	116.571			140	4.1		1.451			3.295			5.259	1.973	1.411					1.123	1.856	3.864	6.236	6.236			1.00649	0.672385			0.453909	0.181726	0.078941	0.07269	0.260098	0.090863	0.234088	0.327106			309.982	259.638
	45.2763	42.08			116.696	136.513			150	2.549		0.724			4.127			4.468	1.503	0.455						1.526	2.79	5.383	5.383			0.936354	0.996016			0.312118	0.099602	0.130049	0.199203	0.186769	0.199203	0.448246	0.498008			238.068	265.508
	46.7793	39.042			131.077	131.367			160	1.368		1.054			2.813			3.164	1.585	1.148						0.913	1.839	4.36	4.36			1.04591	0.962276			0.280154	0.244646	0.130738	0.163098	0.090994	0.114168	0.636957	0.440363			314.872	174.206
	45.6453	38.2843			125.927	125.93			170	0.794					1.047			1.454	1.921								1.2	3.155	3.155			1.16017	0.92656			0.318479	0.120856	0.113742	0.140998	0.025447	0.221569	0.381699	0.443137			214.236	239.485
	44.355	43.193			130.514	134.117			180	0.898								0.914	1.989								0.995	1.902	1.902			0.839737	1.34211			0.432592	0.530603	0.017861	0.218484	0.089305	0.218484	0.250054	0.374544			288.571	349.885
	43.8063	45.4177			115.488	146.184			190	1.053									1.602								1.169	1.006	1.006			0.535829	1.23428			0.17861	0.522193	0.21602	0.142416	0.129612	0.047472	0.345632	0.522193			386.437	190.585
	46.009	45.971			151.27	144.415			200										2.132								1.45					0.950488	0.874061			0.259224	0.223164	0.316536	0.130179	0.094961	0.148776	0.316536	0.371941			291.174	297.645
	44.1203	44.1277			130.318	145.803			210																		1.433					1.17118	0.836553			0.44315	0.239015	0.181752	0.159344	0.159033	0.119508	0.272628	0.318687			364.98	255.57
	46.715	44.0357			137.116	130.318			220																		0.893					0.840603	0.787266			0.22719	0.153613	0.090434	0.153613	0.120578	0.096008	0.482313	0.384032			152.978	163.149
	43.6917	40.3343			123.213	137.812			230																							1.02491	1.39949			0.33159	0.496592	0.166371	0.203151	0.166371	0.112862	0.249556	0.586881			306.574	236.505
	44.1403	45.1417			127.737	152.448																										1.02595	1.30665			0.443656	0.261331	0.226385	0.31733	0.282981	0.279997	0.282981	0.447995			320.581	213.164
	45.0173	42.276			145.141	109.937																										1.01873	0.786569			0.226385	0.189861	0.145155	0.244108	0.120963	0.108492	0.556429	0.244108			311.617	172.316
	42.4713	41.856			116.926	110.974																										0.991895	1.27586			0.169348	0.425286	0.169731	0.151888	0.113154	0.303776	0.39604	0.394909			386.855	230.766
	45.3533	42.1797			131.877	95.499																										1.1504	0.979873			0.471476	0.370763	0.106108	0.105932	0.141478	0.105932	0.778128	0.397246			249.755	226.917
	51.687	42.163			144.475	116.283																										1.34404	0.903461			0.318325	0.169399	0.06931	0.094111	0.103965	0.131755	0.381203	0.508197			266.676	264.479
	52.1717	44.7187			154.153	103.304																										1.03964	1.08642			0.485168	0.310405	0.06206	0.310405	0.03103	0.093121	0.465448	0.372486			289.976	341.642
	47.6213	40.4753			104.934	102.292																										0.868837	0.736261			0.310299	0.26295	0.055941	0.10518	0.139852	0.026295	0.419557	0.341835			215.941	324.254
	55.0633	40.92			148.256	107.715																										0.895055	1.27625			0.279705	0.223904	0.32864	0.111952	0.1264	0.201514	0.40448	0.738883			394.024	245.907
	50.337	41.8937			125.616	110.506																										1.31456	1.1782			0.45504	0.386294	0.200613	0.212462	0.143295	0.077259	0.487204	0.502183			306.494	176.573
	45.7497	41.3183			119.833	100.123																										1.08904	1.10082			0.257931	0.22664	0.157823	0.22664	0.157823	0.057179	0.315647	0.647543			281.27	159.511
	48.468	37.682			110.922	91.24																										1.10476	1.04828			0.47347	0.247775	0.079808	0.076238	0.053206	0.073029	0.133014	0.667086			452.235	157.786
	46.208	38.5707			129.508	98.752																										0.824687	1.07717			0.558659	0.328629	0.189518	0.200829	0.16846	0.187833	0.463265	0.474686			473.986	138.009
	46.4323	45.181			131.855	84.531																										1.15816	1.24439			0.33692	0.28175	0.060065	0.234791	0.090098	0.030949	0.600655	0.54002			210.275	177.247
																																1.02111	1.06773			0.270295	0.324962	0.090098	0.139269	0.120131	0.039349	0.480524	0.572552			436.846	199.455
																																0.961048	0.747634			0.270295	0.137722	0.082852	0.275444	0.165705	0.086503	0.386644	0.295119			263.598	172.328
																																0.828523	0.735273			0.193322	0.129754	0.281193	0.10092	0.051126	0.051273	0.511261	0.418096			299.99	167.852
																																1.09921	1.07673			0.25563	0.333274	0.075056	0.179455	0.100075	0.071712	0.475357	0.512728			251.798	146.233
																																1.00075	0.95616			0.350263	0.23904	0.173195	0.143424	0.173195	0.129688	0.404122	0.501984			449.006	218.357
																																1.0969	1.10234			0.34639	0.216146	0.136068	0.345834	0.077753	0.123434	0.311012	0.410678			498.117	347.263
																																0.816406	0.925754			0.291574	0.246868	0.188176	0.246868	0.094088	0.109343	0.407715	0.308585			468.489	235.114
																																1.06633	1.36679			0.376353	0.382702	0.188331	0.382702	0.263663	0.197425	0.489661	0.492045			345.442	242.094
																																1.31832	0.899379			0.376662	0.197425	0.13667	0.131616	0.13667	0.10334	0.427095	0.372913			447.249	214.843
																																1.04211	1.05924			0.341676	0.310021	0.280725	0.206681	0.056145	0.295194	0.421088	0.439197			284.167	252.308
																																0.954466	1.26934			0.196508	0.236155	0.350296	0.147597	0.159226	0.064125	0.445831	0.590388			509.616	178.577
																																1.36934	1.41075			0.413986	0.448876	0.055495	0.256501	0.092492	0.117188	0.425461	0.641252			167.742	193.648
																																0.924915	1.05469			0.351468	0.217635	0.269351	0.167412	0.269351	0.109154	0.370358	0.552458			171.596	172.237
																																1.24575	0.818658			0.336689	0.018192	0.155308	0.218309	0.093185	0.145377	0.55911	0.473002			237.47	213.23
																																1.18034	1.23571			0.37274	0.314984	0.274225	0.072689	0.02493	0.057917	0.57338	0.702656			351.786	137.313
																																1.29634	0.849454			0.423803	0.231669	0.152129	0.154446	0.095081	0.038344	0.361306	0.405421			266.201	201.711
																																0.969821	0.894683			0.361306	0.21728	0.052706	0.140593	0.158119	0.040444	0.474358	0.498466			258.709	325.505
																																1.10684	0.943689			0.421652	0.283107	0.314183	0.202219	0.13465	0.071853	0.628366	0.417919			297.29	279.028
																																1.43627	0.910136			0.359066	0.359264	0.153878	0.143706	0.102585	0.114593	0.512926	0.335313			192.032	237.288
																																1.07714	1.07431			0.307755	0.243511	0.260339	0.257835	0.185957	0.076668	0.669444	0.458374			316.101	192.802
																																1.52484	0.920016			0.409104	0.210837	0.129483	0.134169	0.07399	0.132629	0.425445	0.498342			246.05	245.754
																																1.10986	1.12735			0.480938	0.154734	0.238841	0.508411	0.079614	0.128913	0.238841	0.331572			340.725	151.814
																																0.87575	1.05279			0.318454	0.150399	0.253239	0.214855	0.05844	0.114753	0.428558	0.558623			213.891	162.272
																																0.954514	0.688516			0.214279	0.160654	0.233118	0.206555	0.077706	0.176478	0.362629	0.206555			374.521	242.323
																																0.958375	1.08408			0.284922	0.252111	0.1934	0.252111	0.24175	0.110044	0.3868	0.403378			249.46	161.781
																																1.1604	1.03756			0.33845	0.267249	0.025394	0.267249	0.025394	0.102754	0.431702	0.393014			393.345	227.378
																																0.83801	1.00185			0.355519	0.205508	0.139101	0.308261	0.099358	0.183405	0.437176	0.385327			218.564	301.798
																																0.953838	1.02182			0.278203	0.183405	0.233195	0.157204	0.116598	0.032896	0.24777	0.497812			182.523	359.672
																																0.947356	0.773052			0.349793	0.230271	0.162038	0.263167	0.101274	0.125576	0.486115	0.246719			353.839	287.678
																																0.992485	0.825216			0.243058	0.089697	0.257246	0.251153	0.064311	0.089931	0.428743	0.358789			292.713	325.487
																																1.00755	1.0857			0.257246	0.331229	0.138397	0.184016	0.138397	0.047754	0.494276	0.570451			427.694	300.635
																																1.04787	0.665492			0.276795	0.269794	0.142665	0.107918	0.142665	0.106311	0.489137	0.197849			281.943	280.16
																																1.0598	1.0506			0.28533	0.358158	0.184162	0.143263	0.110497	0.130401	0.38674	0.501421			371.028	393.817
																																1.01289	0.807961			0.331492	0.212621	0.126008	0.085048	0.072005	0.159861	0.540035	0.40398			208.625	304.013
																																0.882056	0.891072			0.144009	0.239068	0.332484	0.217335	0.221656	0.139726	0.249363	0.304268			299.876	256.658
																																1.05286	0.834828			0.249363	0.159861	0.173819	0.177623	0.077253	0.151338	0.521457	0.337484			348.267	239.037
																																1.10085	0.915978			0.328325	0.201826	0.163972	0.201826	0.29515	0.039367	0.360739	0.372601			295.31	334.761
																																1.11501	1.12423			0.29515	0.086479	0.157473	0.216198	0.134977	0.069039	0.517412	0.670212			342.256	371.322
																																1.12481	0.925124			0.314946	0.137784	0.149524	0.433037	0.149524	0.234247	0.314	0.314936			229.217	593.598
																																0.88219	0.64436			0.269143	0.115064	0.141363	0.138077	0.057016	0.181232	0.399111	0.32218			339.966	426.213
																																0.741205	1.67319			0.285079	0.334638	0.092207	0.669277	0.212044	0.105253	0.306286	0.43503			390.796	283.066
																																1.0131	0.906162			0.353407	0.090616	0.171292	0.432944	0.122943	0.104984	0.445667	0.201369			296.415	179.775
																																0.952805	0.881498			0.291989	0.223664	0.033862	0.19735	0.171292	0.219529	0.542423	0.35523			188.91	248.484
																																1.0563	1.01984			0.171292	0.209967	0.038068	0.209967	0.079012	0.133731	0.316048	0.494923			311.067	268.004
																																0.677247	0.831073			0.248324	0.219529	0.453966	0.141126	0.152271	0.060326	0.513914	0.25089			294.907	281.971
																																0.875557	0.974324			0.171305	0.191044	0.256016	0.248357	0.116371	0.121628	0.324261	0.401192			303.076	209.205
																																1.12411	1.11604			0.345879	0.271469	0.296485	0.241305	0.16942	0.117319	0.186194	0.542937			255.832	369.122
																																1.00079	1.09465			0.44221	0.194605	0.077103	0.413535	0.282711	0.086915	0.402372	0.364884			298.449	246.969
																																1.14358	1.05587			0.275307	0.117319		0.398883		0.231495	0.359814	0.422347			197.479	296.186
																																0.976638	0.956064			0.25701	0.152101		0.195559		0.050208		0.52149			255.913	341.059
																																	1.0996				0.115747		0.202558		0.141035		0.5498			397.969	298.283
																																	0.964001				0.200833		0.220917		0.08277		0.492042			363.614	218.174
																																	0.926803				0.080592		0.241775		0.03258		0.463401			216.495	332.644
																																	0.63457				0.13795		0.08277				0.33108			306.45	285.518
																																	0.781912				0.065159		0.260637				0.423536			254.187	198.888
																																														315.299	232.833
																																														288.271	298.234
																																														411.303	231.167
																																														339.066	164.492
																																														318.809	328.252
																																														325.891	271.324
																																														329.682	229.07
																																														364.863	230.028
																																														225.975	261.444
																																														172.115	194.984
																																														233.026	154.432
																																														344.131	182.541
																																														165.082	341.472
																																														420.818	272.506
																																														179.319	338.185
																																														243.007	233.055
																																														443.77	295.982
																																														254.848	168.712
																																														414.297	319.638
																																														240.866	210.504
																																														201.855	328.458
																																														207.4	324.362
																																														180.423	503.948
																																														212.444	469.632
																																														249.07	147.097
																																															216.056
																																															188.327
																																															161.102
																																															267.198
																																															198.347
																																															164.636
																																															173.608
																																															183.165
																																															328.077
																																															305.472
																																															333.155
																																															207.947
																																															195.536
																																															244.36
																																															242.449
																																															366.551
																																															322.813
																																															313.393
																																															279.375
																																															228.9
																																															182.867
																																															170.659
																																															161.042
																																															157.388
																																															295.487
																																															374.225
																																															209.42
																																															159.436
																																															244.387
																																															179.031
																																															189.572
																																															180.217
																																															155.513
																																															179.281
																																															260.155
																																															263.598
																																															251.271
																																															182.617
																																															158.906
																																															171.137
																																															175.979
																																															175.311
																																															187.128
																																															294.256
																																															243.224
																																															263.557
																																															358.175
																																															238.962
																																															170.63
																																															213.649
																																															286.125
																																															182.065
																																															129.175
																																															241.97
																																															309.055
																																															267.391
																																															151.466
																																															346.216
																																															160.947
																																															313.422
																																															230.376
																																															252.088
																																															317.746
																																															246.793
																																															240.371
																																															341.992
																																															222.673
																																															257.669
[truncated: 2 more columns]
