# Supplementary material for: KIF2C regulates synaptic plasticity and cognition in mice through dynamic microtubule depolymerization
Source: eLife. 2022 Feb 9;11:e72483. doi: 10.7554/eLife.72483 (PMC8828051; doi:10.7554/eLife.72483)
Supplement: Figure 5—source data 1. — Values for PPR ratio; Values for input-output curve of AMPAR and NMDAR mediated EPSCs between WT and cKO neurons; Values for NMDAR and AMPAR subunit surface expression; Values for percentage changes of fEPSCs amplitudes in WT and cKO neurons. [file elife-72483-fig5-data1.xlsx]

## Sheet: Sheet1
Figure 5–source data
	Figure5A						Figure5A				Figure5A						Figure5A				Figure5B							Figure5C				Figure5D
	mEPSC amplitude cumulative probability curves						Amplitude pA				mEPSC frequency cumulative probability curves						Frequency Hz					WT		cKO				%				stimulus intensity(μA)	control											cKO
	WT		cKO				WT	cKO			WT		cKO				WT	cKO			interval(ms)	average	SEM	average	SEM			WT	cKO
	5.493	0.103806	7.324	0.035727			27.729	32.326			10.1	0.0349528	10.6	0.0361141			1.5565	5.1894			20	2.3832	0.1147	2.5535	0.1511			55.681	19.721			25	7.00449	-4.38195	20.2404	9.80159	27.9595	5.67482	8.03464	9.45532	7.24504	-5.14768	4.82484	-8.2881	-5.56087	5.82321	-5.26716	13.0683	12.2071
	6.104	0.207612	7.935	0.107181			16.395	27.931			12.6	0.0699056	12	0.0722282			0.6819	1.1876			40	2.0054	0.0709	2.1681	0.1252			60.106	17.391			30	54.6814	11.7277	42.4238	42.2452	41.0975	10.5156	8.96999	35.0887	12.0301	18.8984	16.0661	10.9046	41.3329	20.3986	13.062	64.9134	28.5228
	6.714	0.519031	8.545	0.428725			34.66	26.928			17.2	0.104858	17.9	0.108342			2.0841	2.9928			60	1.8107	0.0616	1.8636	0.1306			53.532	34.851			35	118.802	31.2115	117.089	55.7861	67.8251	63.9349	33.6641	114.455	69.1771	75.3734	188.362	22.0458	89.301	42.9635	47.1251	127.766	82.0805
	7.324	1.00346	9.155	0.893176			25.384	27.067			18.8	0.139811	19.7	0.144456			1.8738	1.8443			80	1.6215	0.0462	1.615	0.0827			47.888	44.525			40	177.999	60.7028	146.075	125.368	91.4466	114.596	98.8088	200.1	188.974	194.289	261.19	104.267	104.855	48.3339	91.7895	184.717	137.979
	7.935	2.24913	9.766	1.7149			23.771	20.934			21.1	0.174764	19.8	0.180571			1.8973	2.415			100	1.4993	0.029	1.5712	0.0905			55.099	48.356			45	247.755	130.154	160.368	184.482	179.629	131.497	131.98	223.173	297.352	217.843	352.42	182.286	145.15	71.6729	102.645	181.701	135.798
	8.545	4.11765	10.376	2.85816			17.813	29.832			21.7	0.209717	22	0.216685			2.1614	1.7012			150	1.4034	0.029	1.4448	0.0809			28.62	7.6569			50	251.233	185.087	167.28	218.839	213.534	138.783	157.409	265.292	360.661	221.828	370.788	228.243	141.494	76.5841	109.153	149.338	109.537
	9.155	7.02422	10.986	4.50161			18.338	30.374			22.8	0.24467	22.1	0.252799			0.8765	0.1672			200	1.323	0.037	1.3638	0.0605			18.875	30.245
	9.766	10.2768	11.597	6.39514			13.525	24.567			23.2	0.279623	22.8	0.288913			0.4853	2.5726			300	1.2186	0.042	1.2843	0.0594			52.191	51.495
	10.376	13.91	12.207	8.7174			14.247	26.65			23.9	0.314575	23.3	0.325027			1.3458	1.4754			400	1.1418	0.0462	1.1629	0.0445			52.087	38.362
	10.986	17.9931	12.817	11.2897			23.449	27.015			25	0.349528	25.4	0.361141			0.956	0.7153										35.754	20.47
	11.597	21.5571	13.428	13.5406			31.406	29.543			26.9	0.384481	26	0.397255			3.269	1.6845
	12.207	25.0865	14.038	16.4344			25.138	27.12			29.7	0.419434	26.8	0.433369			0.7975	0.7162
	12.817	29.2734	14.648	19.0068			15.086	20.928			29.8	0.454387	29.3	0.469484			0.7758	2.9198
	13.428	33.1488	15.259	21.5434			23.567	28.771			30.9	0.489339	30	0.505598			4.7497	2.1099
	13.5252	33.1834	15.869	24.7231			21.695	35.343			31	0.524292	30.3	0.541712			1.7865	1.8439
	14.038	37.0934	16.479	26.831			18.811	31.815			31.8	0.559245	33.3	0.577826			1.6855	0.9461
	14.648	40.4844	17.09	29.3676			24.315	23.34			31.9	0.594198	35.5	0.61394			0.7761	1.2716
	15.086	40.519	17.7	32.0114			22.12	30.633			33.2	0.629151	35.6	0.650054			2.3629	2.2022
	15.259	43.7024	18.311	34.3694			21.673	26.321			33.7	0.664103	36	0.686168			2.1194	1.5272
	15.869	46.2976	18.921	36.0843			17.748	26.947			34	0.699056	36.5	0.758397			2.1547	0.8227
	16.3945	46.3322	19.531	38.2994			21.015	25.224			39.5	0.734009	37.1	0.794511			3.2395	0.929
	16.479	49.0657	20.142	40.3358							39.7	0.768962	37.3	0.830625
	17.09	51.6955	20.752	42.5152							40.6	0.803915	39.6	0.866739
	17.7	53.2872	21.362	44.0872							41.8	0.838868	40.2	0.902853
	17.7482	53.3218	21.973	46.1951							42.5	0.87382	40.8	0.938967
	18.311	55.2941	22.583	48.0529							42.7	0.908773	43.1	0.975081
	18.921	56.8166	23.193	49.4105							43.1	0.943726	43.2	1.0112
	19.531	58.3391	23.3398	49.4462							46.2	1.01363	44.7	1.04731
	20.142	59.5848	23.804	50.8039							47.1	1.04858	45.1	1.08342
	20.752	60.9343	24.414	52.5545							47.3	1.11849	45.3	1.11954
	21.362	62.1107	25.024	54.2337							47.7	1.15344	45.4	1.19177
	21.973	63.6332	25.2244	54.2694							49	1.1884	46	1.22788
	22.583	64.7751	25.635	55.5198							49.4	1.22335	48.3	1.26399
	23.193	65.9862	26.245	57.2347							51.2	1.2583	48.8	1.30011
	23.4487	66.0208	26.855	59.164							53.1	1.32821	50.4	1.33622
	23.7705	66.0554	26.947	59.1997							53.4	1.36316	50.7	1.37234
	23.804	67.301	27.0154	59.2354							56.8	1.39811	51.2	1.40845
	24.414	68.1315	27.0665	59.2712							57	1.43307	51.7	1.44456
	25.024	69.3772	27.1197	59.3069							58.2	1.46802	52.5	1.48068
	25.1381	69.4118	27.466	60.5931							58.9	1.50297	52.6	1.51679
	25.3841	69.4464	27.9313	60.6288							60.7	1.53792	53.7	1.55291
	25.635	70.4498	28.076	61.7006							60.8	1.57288	53.9	1.58902
	26.245	71.4187	28.687	63.094							61.5	1.60783	54.2	1.62514
	26.855	72.7682	29.297	64.3444							61.7	1.64278	54.7	1.66125
	27.466	74.2215	29.5429	64.3801							61.8	1.67774	57	1.69736
	28.076	75.0865	29.907	65.5949							61.9	1.71269	57.1	1.73348
	28.687	76.0208	30.518	66.2379							62	1.78259	58	1.76959
	29.297	76.9204	31.128	67.4884							64.4	1.81755	58.7	1.80571
	29.907	77.7509	31.738	68.7031							64.6	1.8525	59.8	1.84182
	30.518	78.5813	31.8146	68.7388							66.1	1.88745	60.2	1.87793
	31.128	79.4118	32.349	69.5963							66.3	1.9224	61.4	1.91405
	31.738	80.519	32.959	70.7395							66.5	1.95736	61.9	1.95016
	32.349	81.3149	33.569	71.7042							67	1.99231	62.7	1.98628
	32.959	82.526	34.18	72.7403							67.1	2.02726	62.9	2.02239
	33.569	83.1488	34.79	73.8121							69.2	2.06222	63.1	2.0585
	34.18	83.9446	35.4	75.0625							69.5	2.09717	64.1	2.09462
	34.79	84.7751	36.011	75.8842							69.6	2.13212	67	2.13073
	35.4	85.4325	36.621	76.9561							72.5	2.16707	67.9	2.16685
	36.011	86.0208	37.231	77.9564							75.2	2.23698	68.2	2.20296
	36.621	86.6782	37.842	78.8853							76.3	2.27193	68.8	2.23908
	37.231	87.3356	38.452	79.8499							77.1	2.30689	68.9	2.27519
	37.842	87.9585	39.063	80.5288							77.4	2.34184	70.3	2.3113
	38.452	88.5467	39.673	81.7078							78.5	2.37679	70.4	2.34742
	39.063	88.9619	40.283	82.5295							81.4	2.41174	72.1	2.38353
	39.673	89.481	40.894	83.244							82.3	2.4467	72.2	2.41965
	40.283	90.2422	41.504	84.1729							83	2.48165	72.4	2.45576
	40.894	90.7958	42.114	85.1018							83.6	2.5166	72.8	2.49187
	41.504	91.4879	42.725	85.7092							84	2.55156	73	2.52799
	42.114	92.0761	43.335	86.2094							85.3	2.58651	74.1	2.5641
	42.725	92.3183	43.945	86.7453							87.9	2.62146	74.4	2.63633
	43.335	92.699	44.556	87.4955							90.1	2.65641	74.5	2.67244
	43.945	93.0796	45.166	88.0672							91.7	2.69137	75	2.70856
	44.556	93.4948	45.776	88.7817							93.4	2.72632	75.5	2.74467
	45.166	93.8062	46.387	89.6749							95.1	2.76127	76.2	2.78079
	45.776	94.083	46.997	90.2465							96.3	2.79623	77	2.8169
	46.387	94.3945	47.607	90.711							96.6	2.83118	77.2	2.85302
	46.997	94.9135	48.218	91.1754							97.2	2.86613	77.6	2.88913
	47.607	95.1903	48.828	91.7113							97.6	2.90108	78.3	2.92524
	48.218	95.5363	49.438	92.1043							98.9	2.93604	79.2	2.96136
	48.828	95.9516	50.049	92.676							99.8	2.97099	79.3	2.99747
	49.438	96.2284	50.659	92.9618							102.9	3.00594	79.4	3.03359
	50.049	96.3668	51.27	93.462							103.6	3.04089	79.5	3.10581
	50.659	96.5398	51.88	93.712							104.2	3.07585	80.3	3.14193
	51.27	96.782	52.49	94.105							106.3	3.1108	81.4	3.17804
	51.88	96.9896	53.101	94.3909							106.6	3.14575	83.9	3.21416
	52.49	97.0588	53.711	94.8196							106.7	3.18071	85.6	3.25027
	53.101	97.2664	54.321	95.2126							107	3.21566	86.5	3.28638
	53.711	97.474	54.932	95.5341							108.7	3.25061	87.9	3.3225
	54.321	97.5087	55.542	95.7485							109	3.28556	88.7	3.35861
	54.932	97.7163	56.152	95.9986							111	3.32052	90.6	3.39473
	55.542	97.7509	56.763	96.1415							112	3.35547	90.7	3.43084
	56.152	97.8201	57.373	96.3201							112.4	3.39042	91	3.46696
	56.763	97.9239	57.983	96.4987							113.5	3.42538	92.6	3.50307
	57.373	98.0969	58.594	96.6417							113.9	3.46033	92.7	3.53918
	57.983	98.2007	59.204	96.8203							116.2	3.49528	93.6	3.5753
	58.594	98.3391	59.814	96.8917							116.9	3.56519	94.2	3.61141
	59.204	98.5121	60.425	97.249							117.6	3.60014	97	3.68364
	59.814	98.6159	61.035	97.4277							117.9	3.63509	100.6	3.71975
	60.425	98.6851	61.646	97.6063							118.5	3.67005	101	3.75587
	61.035	98.7543	62.256	97.7492							119.2	3.705	101.9	3.79198
	61.646	98.8581	62.866	97.8921							119.6	3.73995	103.1	3.8281
	62.256	98.9965	63.477	98.0707							120.6	3.7749	103.5	3.86421
	63.477	99.0311	64.087	98.1422							122.7	3.80986	104.7	3.90033
	64.697	99.0657	64.697	98.1779							123.3	3.84481	106.4	3.93644
	65.308	99.1349	65.308	98.2136							123.7	3.87976	106.7	3.97255
	65.918	99.2042	65.918	98.3208							123.8	3.91472	108.7	4.00867
	66.528	99.308	66.528	98.3923							125	3.94967	110.6	4.04478
	67.139	99.3772	68.359	98.428							126.3	3.98462	110.8	4.0809
	68.359	99.4464	68.97	98.4995							126.8	4.01957	111.9	4.11701
	68.97	99.5502	69.58	98.5352							129.9	4.05453	112	4.15312
	70.19	99.5848	70.19	98.6066							131.1	4.08948	112.8	4.22535
	72.632	99.6194	70.801	98.7853							131.6	4.12443	113.8	4.26147
	73.242	99.6886	71.411	98.8567							132.4	4.15938	114.8	4.29758
	73.853	99.7232	72.021	98.9639							132.9	4.19434	115.2	4.33369
	75.073	99.7578	72.632	98.9996							133.1	4.22929	116.1	4.36981
	78.735	99.7924	73.242	99.0354							133.9	4.26424	116.6	4.40592
	82.397	99.827	74.463	99.1068							134.9	4.2992	116.8	4.44204
	86.67	99.8616	75.073	99.1426							135.4	4.3691	117	4.47815
	90.942	99.8962	76.904	99.1783							135.9	4.40405	117.2	4.51427
	93.384	99.9308	77.515	99.2497							136.4	4.43901	118.2	4.55038
	97.656	99.9654	78.125	99.3569							136.6	4.47396	119.2	4.58649
	105.591	100	78.735	99.4284							138.1	4.50891	119.7	4.62261
			79.956	99.4998							138.4	4.54387	120.1	4.65872
			82.397	99.5713							139.4	4.57882	122.7	4.69484
			84.839	99.6427							140.4	4.61377	123	4.73095
			85.449	99.6785							140.5	4.64872	124.7	4.76706
			86.06	99.7499							140.6	4.68368	125.1	4.80318
			89.111	99.7856							141.2	4.71863	125.3	4.83929
			90.332	99.8571							141.3	4.75358	125.7	4.87541
			92.163	99.8928							142.1	4.78854	126.3	4.91152
			98.877	99.9285							142.6	4.82349	127.8	4.94763
			106.201	99.9643							143	4.85844	130.9	4.98375
			157.471	100							143.6	4.89339	131.2	5.01986
											147.2	4.92835	131.8	5.05598
											148	4.9633	132.6	5.12821
											149.5	4.99825	133.9	5.16432
											149.8	5.03321	134	5.20043
											151.7	5.06816	134.1	5.23655
											153.6	5.10311	135.1	5.27266
											153.7	5.13806	135.2	5.30878
											155.5	5.20797	135.4	5.34489
											158.8	5.24292	135.7	5.381
											159.3	5.27787	137.8	5.41712
											160.9	5.31283	138.4	5.45323
											162.4	5.34778	139.7	5.48935
											167	5.38273	140.7	5.52546
											167.7	5.41769	141.1	5.56157
											169	5.45264	141.8	5.59769
											169.4	5.48759	142.3	5.6338
											171.4	5.52254	142.9	5.70603
											171.7	5.5575	143.3	5.74215
											171.9	5.59245	144.6	5.77826
											172.7	5.6274	146.3	5.81437
											172.8	5.66236	148.2	5.85049
											173.3	5.69731	148.5	5.8866
											174.6	5.73226	148.6	5.92272
											175.2	5.76721	150.7	5.95883
											176.5	5.80217	150.8	5.99494
											178.3	5.83712	155	6.03106
											178.9	5.87207	155.7	6.06717
											179.5	5.90703	158	6.10329
											179.9	5.94198	158.8	6.1394
											180	5.97693	159.4	6.17551
											181.4	6.01188	159.5	6.21163
											181.7	6.04684	162.2	6.24774
											182.6	6.08179	163.7	6.28386
											183.5	6.11674	164.1	6.31997
											184	6.1517	164.2	6.35609
											184.6	6.18665	164.9	6.3922
											185	6.2216	165.6	6.42831
											187	6.25655	166.1	6.46443
											187.2	6.29151	168	6.50054
											187.5	6.32646	168.7	6.53666
											187.7	6.36141	169.1	6.57277
											188.1	6.39636	169.8	6.60888
											188.5	6.43132	170	6.645
											189.4	6.46627	172.2	6.68111
											189.5	6.50122	173.3	6.71723
											189.6	6.53618	173.5	6.75334
											190.2	6.57113	174.4	6.78945
											192.4	6.64103	175.1	6.82557
											193.2	6.67599	175.9	6.8978
											194.4	6.71094	178	6.93391
											195.1	6.74589	178.1	6.97003
											196	6.78085	178.4	7.00614
											196.2	6.8158	179.1	7.04225
											197.1	6.85075	180.1	7.07837
											197.5	6.8857	183.3	7.11448
											198.6	6.92066	183.6	7.1506
											199.9	6.95561	185	7.18671
											200.1	6.99056	186.1	7.22282
											202.7	7.02552	186.8	7.29505
											202.8	7.06047	187.1	7.33117
											204.3	7.09542	188	7.36728
											204.6	7.13037	190.1	7.40339
											205.3	7.16533	190.2	7.43951
											205.4	7.20028	190.5	7.47562
											207.1	7.23523	193.4	7.51174
											207.5	7.27019	195.5	7.54785
											209.9	7.30514	197.9	7.58397
											210.6	7.34009	198.3	7.62008
											215.3	7.37504	198.9	7.65619
											216.3	7.41	199.5	7.69231
											216.5	7.44495	200.5	7.72842
											217.6	7.4799	201.3	7.76454
											219.8	7.51485	204.1	7.80065
											220.2	7.54981	204.5	7.83676
											220.6	7.58476	205.3	7.87288
											221.1	7.61971	209.1	7.90899
											222.1	7.65467	211.5	7.94511
											224.7	7.68962	212.5	7.98122
											224.8	7.72457	213.3	8.01733
											225	7.75952	213.5	8.05345
											225.5	7.79448	214.8	8.08956
											226.2	7.82943	215.4	8.12568
											226.6	7.86438	217.7	8.16179
											227	7.89934	220.7	8.19791
											227.2	7.93429	222.5	8.23402
											227.9	7.96924	224.6	8.27013
											228.7	8.00419	227.7	8.30625
											228.8	8.03915	228.7	8.34236
											229.5	8.0741	229	8.37848
											231.3	8.10905	230.5	8.41459
											233.2	8.14401	230.9	8.4507
											233.9	8.21391	231.8	8.48682
											234.4	8.24886	233.2	8.52293
											235.4	8.28382	235.8	8.55905
											236.2	8.31877	235.9	8.59516
											237.4	8.35372	236.2	8.63127
											238.5	8.38868	237.7	8.7035
											238.8	8.42363	238.7	8.73962
											239.8	8.45858	239.6	8.77573
											240.2	8.49353	240	8.81185
											241	8.52849	240.5	8.84796
											243.1	8.56344	241	8.88407
											243.5	8.59839	241.3	8.92019
											244.8	8.63334	241.9	8.9563
											245.1	8.70325	242	8.99242
											248.5	8.7382	242.2	9.02853
											248.7	8.77316	243.9	9.06464
											249.8	8.80811	244.2	9.10076
											250.3	8.84306	244.8	9.17299
											250.5	8.87801	244.9	9.2091
											254	8.91297	245.6	9.28133
											255.5	8.94792	247	9.31744
											256.1	8.98287	247.1	9.35356
											257.4	9.01783	247.3	9.38967
											257.5	9.05278	247.6	9.42579
											257.8	9.08773	248.7	9.4619
											258.6	9.12268	249.6	9.49801
											258.9	9.15764	250.2	9.53413
											260.1	9.19259	251.6	9.57024
											262.5	9.22754	252.3	9.60636
											266.9	9.2625	252.6	9.64247
											267	9.29745	254.3	9.67858
											268.1	9.3324	256.4	9.7147
											269.2	9.36735	256.8	9.75081
											271	9.40231	257.7	9.78693
											271.2	9.43726	258.8	9.82304
											271.5	9.47221	260.2	9.85915
											271.6	9.50717	260.5	9.89527
											272.9	9.54212	260.8	9.93138
											273	9.57707	262.1	9.9675
											273.1	9.61202	262.7	10.0036
											274.8	9.64698	262.9	10.0758
											275	9.68193	264.3	10.112
											275.5	9.71688	264.4	10.1481
											276.2	9.75184	264.6	10.1842
											277	9.78679	265.5	10.2564
											277.1	9.82174	266.4	10.2925
											279.2	9.85669	269.5	10.3286
											279.7	9.89165	271.8	10.3648
											280.2	9.9266	273.3	10.4009
											280.5	9.96155	273.8	10.5092
											280.9	9.9965	275	10.5453
											281.1	10.0315	275.1	10.5814
											281.9	10.0664	277.3	10.6176
											282.5	10.1014	278.4	10.6537
											283.8	10.1363	278.5	10.6898
											284.6	10.1713	279.3	10.7259
											286.2	10.2062	281.3	10.762
											286.6	10.2412	281.5	10.7981
											288.3	10.2761	281.6	10.8342
											291.1	10.3111	282.6	10.8704
											292.8	10.346	282.9	10.9065
											293.3	10.4159	285	10.9426
											293.7	10.4509	285.7	10.9787
											295	10.4858	287.6	11.0148
											296.3	10.5208	288.6	11.0509
											296.6	10.5907	288.7	11.087
											297.8	10.6257	289	11.1231
											300.4	10.6606	290.7	11.1593
											301.1	10.6956	293	11.1954
											302.1	10.7655	293.3	11.2315
											302.2	10.8004	296.7	11.2676
											305.7	10.8354	298.2	11.3037
											305.9	10.8703	298.9	11.3398
											308	10.9053	299.7	11.3759
											309.9	10.9402	301.3	11.4121
											311.1	10.9752	302.9	11.4482
											311.4	11.0101	303	11.4843
											313.2	11.08	303.7	11.5204
											313.3	11.115	304.6	11.5565
											313.5	11.1499	309.1	11.5926
											313.7	11.1849	310.9	11.6287
											313.8	11.2199	311.9	11.6649
											314.2	11.2548	312	11.701
											315.5	11.3247	312.3	11.7371
											315.7	11.3597	312.5	11.7732
											317.6	11.3946	313.3	11.8093
											318.2	11.4296	313.5	11.8454
											318.8	11.4645	315.1	11.8815
											319.1	11.4995	315.6	11.9177
											320	11.5344	315.8	11.9538
											321.5	11.5694	317	11.9899
											322.9	11.6043	317.3	12.026
											324.9	11.6393	317.7	12.0621
											325.8	11.6742	319.4	12.0982
											326.4	11.7092	320.2	12.1343
											326.5	11.7441	320.4	12.1705
											328.7	11.7791	321	12.2066
											330.6	11.8141	321.1	12.2427
											330.8	11.849	322.2	12.3149
											333.7	11.884	323.2	12.351
											334.7	11.9189	324.1	12.3871
											335.3	11.9539	325	12.4233
											336.3	11.9888	325.3	12.4594
											337.6	12.0238	326.2	12.4955
											338.5	12.0587	327.1	12.5677
											338.7	12.0937	327.9	12.6038
											338.9	12.1286	328.2	12.6399
											339.7	12.1636	330.3	12.6761
											340.6	12.2335	330.9	12.7122
											341.1	12.2684	331.7	12.7483
											341.2	12.3034	333	12.7844
											341.7	12.3383	333.1	12.8205
											342.3	12.3733	334.2	12.8566
											344.9	12.4082	335.1	12.8927
											345.4	12.4432	335.8	12.9289
											346.2	12.4782	336.7	12.965
											346.9	12.5131	337.1	13.0011
											347.5	12.5481	338.3	13.0372
											348.6	12.583	340.8	13.0733
											350	12.618	341.2	13.1094
											350.9	12.6529	342.4	13.1455
											352.6	12.6879	342.6	13.1817
											353.8	12.7228	342.7	13.2178
											354.5	12.7578	344.4	13.2539
											354.9	12.7927	344.5	13.29
											355.7	12.8277	345.8	13.3261
											358.6	12.8626	346.7	13.3622
											359.5	12.8976	348.4	13.3983
											359.7	12.9325	350	13.4706
											363.9	12.9675	351.6	13.5067
											364.5	13.0024	352.7	13.5428
											364.7	13.0374	352.8	13.5789
											365.4	13.0724	353.6	13.615
											365.5	13.1073	357.3	13.6511
											366.5	13.1423	357.9	13.6873
											366.8	13.1772	358.4	13.7234
											368.4	13.2471	360.7	13.7595
											369.3	13.2821	360.8	13.7956
											369.4	13.317	361.4	13.8317
											369.8	13.352	365.1	13.8678
											370	13.3869	365.4	13.9039
											370.4	13.4219	365.6	13.9401
											372.3	13.4568	366.4	13.9762
											374.3	13.4918	366.6	14.0123
											374.4	13.5267	368.1	14.0484
											375.7	13.5617	368.2	14.0845
											376.3	13.5966	369.5	14.1567
											376.7	13.6316	372	14.1928
											377.8	13.6666	373.9	14.229
											378.3	13.7015	374.5	14.2651
											381.9	13.7365	375.5	14.3012
											382	13.7714	376	14.3373
											382.7	13.8064	377.6	14.3734
											383.4	13.8413	379	14.4095
											384.4	13.8763	379.3	14.4456
											385.7	13.9112	380.1	14.4818
											386.3	13.9462	380.8	14.5179
											390.8	13.9811	380.9	14.554
											393.4	14.0161	381.6	14.5901
											394.9	14.051	381.8	14.6262
											397.1	14.086	382.1	14.6623
											397.2	14.1209	382.2	14.6984
											400.5	14.1559	385.2	14.7346
											403.5	14.1908	385.5	14.7707
											407	14.2258	386.1	14.8068
											409.6	14.2607	386.3	14.879
											410.5	14.2957	387.8	14.9151
											412.3	14.3307	388.4	14.9512
											421	14.3656	391.2	14.9874
											422.3	14.4006	391.5	15.0235
											422.5	14.4355	392.5	15.0596
											422.6	14.4705	392.9	15.0957
											423	14.5054	393.2	15.1318
											424	14.5404	394.8	15.1679
											424.2	14.5753	394.9	15.204
											425.4	14.6103	397.9	15.2763
											425.9	14.6802	398.4	15.3124
											427	14.7501	400.7	15.3485
											427.4	14.785	401.1	15.3846
											427.7	14.82	403.5	15.4207
											428.2	14.8549	404	15.4568
											431.8	14.8899	404.6	15.493
											432.1	14.9249	405.3	15.5291
											432.7	14.9598	405.9	15.5652
											435	14.9948	407.7	15.6013
											436.9	15.0297	407.9	15.6374
											437	15.0647	408.9	15.6735
											438	15.0996	409.4	15.7096
											438.8	15.1346	410.5	15.7458
											441.9	15.1695	416.3	15.7819
											442.3	15.2045	416.4	15.818
											443.4	15.2394	417.4	15.8541
											447.3	15.2744	418.3	15.8902
											447.6	15.3093	419.3	15.9263
											448.1	15.3443	420	15.9624
											449.6	15.3792	424.6	15.9986
											451	15.4142	425.2	16.0347
											452.2	15.4491	425.7	16.0708
											452.5	15.4841	426.6	16.1069
											453.2	15.519	427.4	16.143
											454.1	15.554	427.8	16.1791
											454.6	15.589	429	16.2152
											455.1	15.6239	430	16.2514
											456.5	15.6589	431.3	16.2875
											456.7	15.6938	431.5	16.3236
											458.1	15.7288	433.1	16.3958
											459.3	15.7637	435.3	16.4319
											460.5	15.7987	435.4	16.468
											462.4	15.8336	435.7	16.5042
											462.6	15.8686	436.3	16.5403
											463	15.9035	436.5	16.5764
											464.5	15.9734	437.5	16.6125
											465	16.0084	437.9	16.6486
											465.1	16.0433	440.5	16.6847
											466.5	16.0783	442.8	16.7208
											466.9	16.1132	445.2	16.757
											467.1	16.1482	446.1	16.7931
											467.4	16.1832	448.4	16.8292
											468.4	16.2181	452.2	16.8653
											468.6	16.2531	452.9	16.9014
											470.3	16.288	453.8	16.9375
											472.3	16.323	454.2	16.9736
											474.6	16.3579	455.5	17.0098
											475.5	16.3929	455.8	17.0459
											476.8	16.4278	458	17.082
											477.1	16.4628	459.2	17.1181
											478.1	16.4977	459.6	17.1542
											478.3	16.5327	460.8	17.1903
											478.9	16.5676	461.4	17.2264
											479	16.6026	463.5	17.2625
											479.7	16.6375	463.8	17.2987
											479.8	16.6725	466	17.3348
											480.1	16.7074	467.7	17.3709
											480.4	16.7424	467.8	17.407
											481.6	16.7774	468.3	17.4431
											482.1	16.8123	469	17.4792
											482.7	16.8473	469.9	17.5153
											483.4	16.8822	471.3	17.5515
											485.3	16.9172	472.1	17.5876
											485.4	16.9521	472.4	17.6237
											486.5	16.9871	473.1	17.6598
											486.8	17.022	475.7	17.6959
											488.9	17.057	475.9	17.732
											490.6	17.0919	476.4	17.7681
											490.8	17.1269	477.4	17.8043
											491.6	17.1618	478.3	17.8404
											491.8	17.1968	478.5	17.8765
											497	17.2317	479.4	17.9126
											497.9	17.2667	481.4	17.9487
											498.4	17.3016	482.2	17.9848
											499.7	17.3366	482.3	18.0209
											500.1	17.3715	482.9	18.0571
											500.5	17.4065	484.1	18.0932
											504.1	17.4415	484.6	18.1293
											504.2	17.4764	485.4	18.1654
											509	17.5114	486.5	18.2015
											510.4	17.5813	489.2	18.2376
											514.2	17.6162	491.5	18.2737
											516.7	17.6512	492.2	18.3099
											517.4	17.6861	492.6	18.346
											518	17.7211	495.5	18.3821
											518.3	17.756	498.3	18.4182
											518.4	17.791	498.7	18.4543
											519.4	17.8259	502.1	18.4904
											519.6	17.8958	503.3	18.5265
											520.4	17.9308	503.5	18.5627
											521.5	17.9657	503.9	18.5988
											522.5	18.0007	505.1	18.6349
											524	18.0357	507.4	18.671
											524.7	18.0706	509.4	18.7071
											525.2	18.1056	511.9	18.7432
											525.6	18.1405	513.8	18.7793
											526	18.1755	514.1	18.8155
											529.5	18.2104	514.4	18.8877
											529.9	18.2454	514.5	18.9238
											531.1	18.2803	514.7	18.9599
											531.8	18.3153	515.1	18.996
											533.1	18.3852	516.1	19.0683
											533.7	18.4201	519.1	19.1044
											534.9	18.4551	521.3	19.1405
											536.3	18.49	521.8	19.1766
											536.5	18.525	522.9	19.2127
											537.5	18.5599	524.5	19.2488
											539.5	18.5949	526	19.2849
											539.7	18.6298	529	19.3211
											540.7	18.6648	530.5	19.3572
											541.1	18.6998	530.8	19.3933
											541.4	18.7347	532.9	19.4294
											542	18.7697	533.2	19.4655
											542.3	18.8046	533.3	19.5016
											543.9	18.8396	536.5	19.5377
											544.5	18.8745	539.5	19.5739
											544.9	18.9095	541.9	19.61
											546.9	18.9444	543.7	19.6461
											547.6	18.9794	544.3	19.7183
											547.7	19.0143	544.6	19.7544
											549.8	19.0493	548.3	19.7905
											550.7	19.0842	549.4	19.8267
											552	19.1192	549.5	19.8628
											553.1	19.1541	554.7	19.8989
											554.4	19.224	556.4	19.935
											554.6	19.259	557.2	19.9711
											555.9	19.294	563.3	20.0072
											556.8	19.3289	563.8	20.0433
											557.2	19.3639	564.4	20.0795
											559.3	19.3988	564.7	20.1156
											559.8	19.4338	570	20.1517
											560.3	19.4687	570.4	20.1878
											560.9	19.5037	571.8	20.2239
											562.1	19.5386	573.9	20.26
											564.3	19.5736	574.2	20.2961
											565.4	19.6085	575.2	20.3322
											567.5	19.6435	575.4	20.3684
											569	19.6784	577.8	20.4045
											569.9	19.7134	578.8	20.4767
											571.3	19.7483	580.2	20.5128
											571.6	19.7833	580.3	20.5489
											571.9	19.8182	580.7	20.585
											572.2	19.8532	582	20.6212
											572.7	19.8882	582.5	20.6573
											574.8	19.9231	582.7	20.6934
											575	19.9581	584.4	20.7295
											575.6	19.993	585.6	20.8017
											578	20.028	586.7	20.8378
											581.4	20.0629	587.6	20.874
											581.5	20.1328	587.8	20.9101
											582.8	20.1678	588	20.9462
											583.1	20.2377	588.1	20.9823
											584.5	20.2726	588.3	21.0184
											586.7	20.3076	588.7	21.0545
											586.8	20.3425	589.6	21.0906
											588.3	20.3775	589.9	21.1268
											591.4	20.4124	590.5	21.1629
											592.4	20.4474	590.6	21.199
											594	20.4823	592.9	21.2351
											595	20.5173	593.8	21.2712
											595.6	20.5523	594.4	21.3073
											595.9	20.5872	596.7	21.3434
											596	20.6222	597.4	21.3796
											597.5	20.6571	601.5	21.4157
											597.8	20.6921	602.2	21.4518
											598.7	20.727	602.5	21.4879
											599.4	20.762	602.7	21.524
											607.5	20.7969	604.3	21.5601
											611	20.8319	604.8	21.5962
											612.2	20.8668	606.1	21.6324
											612.9	20.9018	607.9	21.6685
											615.3	20.9367	608.7	21.7046
											615.6	20.9717	613.6	21.7407
											616.3	21.0066	614.8	21.7768
											617	21.0416	617.1	21.8129
											618.1	21.0765	617.8	21.849
											619.2	21.1115	618.1	21.8852
											619.5	21.1465	619.1	21.9213
											622.7	21.1814	619.7	21.9574
											623.9	21.2164	620.2	21.9935
											624	21.2513	623.5	22.0296
											626.8	21.2863	628	22.0657
											629	21.3212	632.2	22.1018
											629.2	21.3562	632.5	22.138
											629.9	21.3911	632.9	22.1741
											630.3	21.4261	633.1	22.2102
											632.7	21.461	633.8	22.2463
											632.8	21.496	637	22.2824
											635.1	21.5309	637.7	22.3546
											635.8	21.5659	638.7	22.3908
											639.7	21.6008	639.2	22.4269
											641.3	21.6358	641.3	22.463
											641.5	21.6707	641.5	22.4991
											643.4	21.7057	641.8	22.5352
											643.6	21.7407	642	22.5713
											646	21.7756	643	22.6074
											649.3	21.8106	645.4	22.6436
											652.5	21.8455	646.5	22.6797
											653.3	21.9154	647	22.7158
											653.5	21.9504	647.5	22.7519
											653.9	21.9853	649.1	22.788
											656.5	22.0203	649.5	22.8241
											656.6	22.0552	650.1	22.8602
											657	22.0902	650.8	22.8964
											659.8	22.1601	651.1	22.9325
											660.2	22.195	651.5	22.9686
											660.3	22.23	652.9	23.0047
											665.6	22.2649	654.3	23.0408
											668.7	22.2999	657.5	23.0769
											669.7	22.3348	659.6	23.113
											671.3	22.3698	660.5	23.1492
											671.5	22.4048	661.3	23.1853
											672.2	22.4747	662.2	23.2214
											675	22.5096	663.5	23.2575
											675.4	22.5446	665.6	23.2936
											679.4	22.5795	668.2	23.3297
											679.6	22.6494	669.5	23.3658
											679.8	22.6844	670.2	23.402
											681.9	22.7193	672.4	23.4381
											682.5	22.7543	673.1	23.4742
											683.6	22.7892	674.2	23.5103
											686.6	22.8591	675.3	23.5464
											686.8	22.8941	676.7	23.5825
											686.9	22.929	679.1	23.6186
											687	22.964	679.5	23.6547
											688.6	22.999	680.1	23.6909
											690.9	23.0339	680.9	23.727
											694	23.0689	682.1	23.7631
											695.6	23.1038	682.6	23.7992
											697.5	23.1737	683.5	23.8353
											699.1	23.2087	683.8	23.8714
											705.1	23.2436	684.5	23.9075
											707.6	23.2786	684.9	23.9437
											711.2	23.3135	686.8	23.9798
											713.4	23.3485	687	24.0159
											714	23.3834	689.6	24.052
											714.3	23.4184	691.2	24.0881
											716.8	23.4533	691.3	24.1242
											717.3	23.4883	692.3	24.1603
											720.3	23.5232	693	24.1965
											721	23.5582	693.1	24.2326
											725.6	23.5931	693.5	24.3048
											726.1	23.6281	695.8	24.3409
											727.8	23.6631	696.3	24.377
											731.6	23.698	698.1	24.4493
											733.9	23.733	699.7	24.4854
											734.4	23.7679	700	24.5215
											734.7	23.8029	702.1	24.5576
											736.9	23.8378	707.6	24.5937
											740.8	23.8728	710	24.6298
											742.5	23.9077	710.2	24.6659
											742.7	23.9427	711.5	24.7021
											743.5	23.9776	711.7	24.7382
											743.7	24.0126	711.8	24.7743
											747.6	24.0475	715.9	24.8104
											748.4	24.0825	716.2	24.8465
											749.1	24.1174	723.2	24.8826
											752.7	24.1524	723.7	24.9549
											756.2	24.1873	726.9	24.991
											759.4	24.2573	729.1	25.0271
											760.4	24.2922	729.2	25.0632
											763.3	24.3272	729.4	25.0993
											763.4	24.3621	730.9	25.1354
											763.8	24.3971	733.2	25.1715
											764	24.432	734.2	25.2077
											764.1	24.467	735.9	25.2438
											765.2	24.5019	737.8	25.2799
											766.9	24.5369	738.5	25.316
											767.2	24.5718	740.8	25.3521
											769	24.6068	746.5	25.3882
											769.6	24.6417	749.3	25.4243
											773.2	24.6767	749.7	25.4605
											776	24.7116	750.6	25.4966
											777.1	24.7466	752.6	25.5327
											785	24.7815	754.9	25.5688
											785.5	24.8165	755.1	25.6049
											786.3	24.8515	756	25.641
											788.9	24.9214	756.2	25.6771
											789.6	24.9563	756.3	25.7133
											790.5	24.9913	757.7	25.7494
											791.5	25.0262	762.2	25.8216
											794.2	25.0612	765	25.8577
											794.5	25.0961	765.3	25.8938
											795.7	25.166	767.8	25.9299
											797.5	25.201	769.5	25.9661
											799.8	25.2359	770.1	26.0022
											802.9	25.2709	770.2	26.0744
											806.2	25.3058	771.5	26.1105
											807.6	25.3408	771.6	26.1466
											809.8	25.3757	772.5	26.1827
											811.2	25.4107	772.7	26.2189
											811.3	25.4456	776.5	26.255
											812.3	25.4806	777.2	26.2911
											813.6	25.5156	778.1	26.3272
											814.2	25.5505	782.4	26.3633
											815.4	25.5855	783.5	26.3994
											816.9	25.6204	784.6	26.4355
											817.1	25.6554	786.7	26.4717
											819.1	25.6903	788.5	26.5078
											821.4	25.7253	790.5	26.5439
											822.4	25.7602	793.5	26.58
											824.6	25.7952	797.9	26.6161
											825.9	25.8301	799	26.6522
											827.2	25.8651	800.4	26.6883
											830.6	25.9	802.6	26.7244
											830.9	25.935	802.7	26.7606
											831.2	25.9699	803	26.7967
											832.1	26.0049	804.6	26.8328
											832.8	26.0398	805.2	26.8689
											833.2	26.0748	805.9	26.905
											834.3	26.1098	808.9	26.9411
											835	26.1447	809.2	26.9772
											838.5	26.1797	810	27.0134
											841.8	26.2146	811.3	27.0495
											841.9	26.2496	814	27.1217
											843.1	26.2845	814.5	27.1578
											844.7	26.3195	814.9	27.1939
											846.4	26.3544	818.2	27.23
											847.7	26.3894	819.1	27.2662
											851.5	26.4243	820.5	27.3023
											853.6	26.4593	824.2	27.3384
											855.4	26.4942	826.7	27.3745
											857.5	26.5292	828.9	27.4106
											860	26.5641	829.1	27.4467
											862.8	26.5991	830.3	27.4828
											867.2	26.634	831	27.519
											868.5	26.669	831.4	27.5551
											870.4	26.7039	835.1	27.5912
											870.7	26.7389	837.1	27.6273
											870.8	26.7739	840.3	27.6634
											871.8	26.8088	842.7	27.6995
											873.6	26.8438	846.8	27.7356
											873.9	26.8787	852.1	27.7718
											875.3	26.9137	854	27.8079
											877.8	26.9486	856.3	27.844
											878	26.9836	858.7	27.8801
											883.4	27.0185	860.8	27.9162
											883.6	27.0535	861.5	27.9523
											886	27.0884	862.7	27.9884
											886.8	27.1234	865.6	28.0246
											887.4	27.1583	867.3	28.0607
											891.7	27.1933	868.2	28.0968
											896.6	27.2282	869.6	28.1329
											896.7	27.2632	869.7	28.169
											898.5	27.2981	870.2	28.2051
											898.6	27.3331	871.2	28.2412
											898.9	27.3681	872.8	28.2774
											899	27.403	875.2	28.3496
											900.2	27.438	876.4	28.3857
											901.1	27.4729	876.8	28.4218
											902.6	27.5079	880.2	28.4579
											904.2	27.5428	880.4	28.494
											904.3	27.5778	882.2	28.5302
											904.6	27.6127	884.8	28.5663
											905.3	27.6477	886.3	28.6024
											905.9	27.7176	886.8	28.6385
											906.3	27.7525	888	28.6746
											906.6	27.7875	889.2	28.7107
											907.9	27.8224	889.3	28.7468
											908	27.8574	890	28.783
											908.1	27.8923	890.5	28.8191
											909.5	27.9273	891.2	28.8552
											911.4	27.9623	892.3	28.8913
											911.7	27.9972	894.5	28.9274
											912.1	28.0322	895.2	28.9635
											915	28.0671	896.7	28.9996
											915.5	28.1021	897.2	29.0358
											915.6	28.137	898.1	29.0719
											916.7	28.172	898.5	29.108
											917.6	28.2069	899.6	29.1441
											918.6	28.2419	902.5	29.1802
											922.5	28.2768	905.5	29.2163
											924.7	28.3118	908	29.2524
											925.9	28.3467	909.2	29.2886
											927	28.3817	910.9	29.3247
											927.9	28.4166	911.3	29.3608
											933.2	28.4865	916.6	29.3969
											933.6	28.5215	921	29.433
											934.5	28.5564	923.4	29.4691
											938.8	28.5914	924.7	29.5052
											941.8	28.6613	925.9	29.5414
											941.9	28.6963	926.4	29.5775
											944	28.7312	927.1	29.6136
											946.6	28.7662	928	29.6497
											947	28.8011	934.2	29.6858
											949	28.8361	934.7	29.7219
											949.3	28.871	935.4	29.758
											954	28.906	935.6	29.8303
											955.3	28.9409	937.8	29.8664
											957.7	28.9759	939.6	29.9025
											962	29.0108	943.5	29.9386
											963.6	29.0458	943.7	29.9747
											963.7	29.0807	945.5	30.0108
											964.1	29.1157	946.4	30.0469
											967.1	29.1506	946.8	30.0831
											967.4	29.1856	946.9	30.1192
											968.3	29.2206	947.4	30.1553
											968.7	29.2555	948.7	30.1914
											969.6	29.2905	952	30.2275
											973.5	29.3254	953.9	30.2636
											978.9	29.3604	957	30.2997
											984.6	29.3953	959.9	30.3359
											985.5	29.4303	962.5	30.372
											987.1	29.4652	964.1	30.4081
											988.3	29.5002	968.6	30.4442
											989.4	29.5351	971.6	30.4803
											992.5	29.5701	973.3	30.5164
											994	29.605	973.6	30.5525
											996.1	29.64	973.8	30.5887
											996.2	29.6749	974.3	30.6248
											997.7	29.7099	977.1	30.6609
											998	29.7448	978.3	30.697
											998.1	29.7798	978.6	30.7331
											1001.3	29.8148	978.7	30.8053
											1001.9	29.8497	978.8	30.8415
											1002.4	29.8847	978.9	30.8776
											1003.7	29.9196	982.7	30.9137
											1004.2	29.9546	983.4	30.9498
											1005	29.9895	987.3	30.9859
											1005.6	30.0245	988.7	31.022
											1009	30.0944	988.9	31.0581
											1009.3	30.1293	991.5	31.0943
											1009.8	30.1643	992.8	31.1304
											1010.4	30.1992	999.4	31.1665
											1010.6	30.2342	1001.2	31.2026
											1012.7	30.2691	1003.3	31.2387
											1013.1	30.3041	1003.6	31.2748
											1014.1	30.339	1006.9	31.3109
											1015.4	30.374	1007.2	31.3471
											1015.7	30.4089	1009.3	31.3832
											1017.7	30.4439	1009.7	31.4193
											1018.7	30.4789	1011.3	31.4554
											1022.4	30.5138	1015.8	31.4915
											1025.3	30.5488	1016.3	31.5276
											1026.9	30.5837	1018.3	31.5999
											1027.6	30.6536	1020.8	31.636
											1029.5	30.6886	1023.4	31.6721
											1029.8	30.7235	1024.7	31.7082
											1032.3	30.7585	1025.3	31.7443
											1033.7	30.7934	1025.9	31.7804
											1035.2	30.8284	1027.6	31.8165
											1036	30.8633	1029.3	31.8527
											1036.2	30.8983	1031.6	31.8888
											1036.4	30.9332	1032.1	31.9249
											1036.8	30.9682	1032.7	31.961
											1039.3	31.0031	1035.5	31.9971
											1041.1	31.0381	1035.7	32.0332
											1044.4	31.0731	1035.8	32.0693
											1045.1	31.108	1035.9	32.1055
											1047	31.143	1037.3	32.1416
											1047.9	31.1779	1038.2	32.1777
											1050	31.2129	1039.2	32.2138
											1053.5	31.2478	1040	32.2499
											1057.4	31.2828	1041.3	32.286
											1058	31.3177	1043.8	32.3221
											1058.6	31.3527	1045.7	32.3583
											1058.7	31.3876	1045.8	32.3944
											1059.5	31.4226	1047.4	32.4305
											1062	31.4575	1047.5	32.4666
											1063.4	31.4925	1050.1	32.5027
											1068.4	31.5274	1052.5	32.5388
											1070.1	31.5624	1055.6	32.6111
											1070.3	31.5973	1056.6	32.6833
											1071.8	31.6323	1056.7	32.7194
											1073.7	31.6672	1057.1	32.7555
											1076.8	31.7022	1057.5	32.7916
											1077.1	31.7372	1058.3	32.8277
											1078.1	31.7721	1059	32.8638
											1080.5	31.8071	1060.5	32.9
											1089.5	31.842	1062.3	32.9361
											1090.3	31.877	1063.1	33.0083
											1090.4	31.9119	1063.9	33.0444
											1091.7	31.9469	1065.5	33.0805
											1093.6	32.0168	1065.6	33.1166
											1098.9	32.0517	1066.2	33.1528
											1099.9	32.0867	1066.8	33.1889
											1101.3	32.1216	1068.3	33.225
											1102.8	32.1566	1071.4	33.2611
											1103.7	32.1915	1076	33.2972
											1104.2	32.2265	1076.5	33.3333
											1106.7	32.2614	1077.3	33.3694
											1107.1	32.2964	1080.2	33.4056
											1107.6	32.3314	1082.6	33.4417
											1108.2	32.3663	1083	33.4778
											1110.3	32.4013	1088.1	33.5139
											1110.6	32.4362	1090.6	33.55
											1111.8	32.4712	1090.8	33.5861
											1118	32.5061	1091.8	33.6222
											1119.7	32.5411	1095.6	33.6584
											1125.5	32.576	1098.3	33.6945
											1125.6	32.611	1101.1	33.7306
											1127.6	32.6459	1102.3	33.8028
											1130.6	32.6809	1103.4	33.8389
											1132.5	32.7158	1103.5	33.875
											1136	32.7508	1105.6	33.9112
											1136.5	32.7857	1106.2	33.9473
											1137	32.8207	1112.3	33.9834
											1137.5	32.8556	1113.7	34.0195
											1138.8	32.8906	1114	34.0556
											1139.2	32.9256	1114.5	34.0917
											1139.7	32.9605	1121.3	34.1278
											1140.4	32.9955	1124.8	34.164
											1142	33.0304	1125.5	34.2001
											1143.5	33.0654	1128	34.2362
											1145.6	33.1003	1128.7	34.2723
											1145.7	33.1353	1129.7	34.3084
											1145.8	33.1702	1131.3	34.3445
											1150	33.2052	1132.9	34.3806
											1150.5	33.2401	1133.3	34.4168
											1150.9	33.2751	1133.9	34.4529
											1154	33.31	1135	34.489
											1156.5	33.345	1136.3	34.5251
											1156.6	33.3799	1136.7	34.5612
											1158	33.4149	1137.5	34.5973
											1161.3	33.4498	1141.9	34.6334
											1161.5	33.4848	1145.3	34.6696
											1166.9	33.5197	1145.4	34.7057
											1169.9	33.5547	1147.3	34.7418
											1175.1	33.5897	1147.8	34.7779
											1175.8	33.6246	1148	34.814
											1176.5	33.6596	1151.7	34.8501
											1177.1	33.6945	1152.4	34.8862
											1183.6	33.7295	1154.8	34.9224
											1187.1	33.7644	1156.5	34.9585
											1187.7	33.7994	1158	34.9946
											1188.3	33.8343	1158.1	35.0307
											1191.2	33.8693	1159	35.0668
											1193.9	33.9392	1159.1	35.1029
											1194.2	33.9741	1162.2	35.139
											1195.6	34.0091	1163.5	35.1752
											1195.8	34.044	1164.9	35.2113
											1196.2	34.079	1167.5	35.2474
											1196.3	34.1139	1167.6	35.2835
											1198.4	34.1489	1170.7	35.3196
											1200.9	34.1839	1176.6	35.3557
											1203.4	34.2188	1178.2	35.3918
											1203.6	34.2538	1178.5	35.4641
											1204.5	34.2887	1179.3	35.5002
											1204.6	34.3237	1179.9	35.5363
											1204.8	34.3586	1183.7	35.5724
											1207	34.3936	1185.1	35.6085
											1209.4	34.4285	1185.9	35.6446
											1213.3	34.4635	1189.5	35.6808
											1213.7	34.4984	1190.9	35.7169
											1215.7	34.5334	1195.7	35.753
											1216.1	34.5683	1197.1	35.7891
											1217.1	34.6033	1197.8	35.8252
											1219.4	34.6382	1198.3	35.8613
											1220.5	34.6732	1200.4	35.8974
											1226.3	34.7081	1201.2	35.9336
											1228.3	34.7431	1204.5	35.9697
											1230.1	34.778	1205.2	36.0058
											1232.6	34.813	1211.7	36.0419
											1234.1	34.848	1211.8	36.078
											1236.4	34.8829	1212.3	36.1141
											1238.7	34.9179	1215.4	36.1502
											1240	34.9528	1217	36.1863
											1240.9	35.0227	1218.9	36.2225
											1241.2	35.0577	1221	36.2586
											1241.3	35.0926	1223.5	36.2947
											1243.6	35.1276	1223.9	36.3669
											1245	35.1625	1229.4	36.403
											1245.4	35.1975	1235.2	36.4391
											1247.2	35.2324	1235.3	36.4753
											1255.6	35.2674	1235.8	36.5114
											1256	35.3023	1236.4	36.5475
											1257.7	35.3373	1236.5	36.5836
											1259.1	35.3722	1237.5	36.6197
											1260.5	35.4072	1238.5	36.6558
											1261.3	35.4422	1238.7	36.6919
											1265.8	35.4771	1240.8	36.7281
											1269.2	35.5121	1242.8	36.7642
											1269.6	35.547	1247	36.8003
											1269.7	35.582	1248.1	36.8364
											1275.3	35.6169	1249.1	36.8725
											1277	35.6519	1249.7	36.9086
											1278.1	35.6868	1250	36.9447
											1280	35.7218	1250.4	36.9809
											1282.5	35.7567	1251	37.017
											1282.8	35.7917	1251.3	37.0531
											1286	35.8266	1252.2	37.0892
											1286.8	35.8616	1253.5	37.1253
											1288.4	35.8965	1255.1	37.1614
											1297.2	35.9315	1256.7	37.1975
											1301.9	35.9664	1257.6	37.2337
											1303.1	36.0014	1260.1	37.2698
											1306.1	36.0364	1260.6	37.3059
											1308.3	36.0713	1262	37.342
											1308.4	36.1063	1262.1	37.3781
											1309.9	36.1412	1264.1	37.4142
											1313.8	36.1762	1264.5	37.4503
											1315.4	36.2111	1272.1	37.4865
											1315.5	36.2461	1272.4	37.5226
											1316.4	36.281	1272.5	37.5587
											1316.5	36.316	1273.3	37.5948
											1327.4	36.3509	1273.4	37.6309
											1329.4	36.3859	1275.2	37.667
											1331.3	36.4208	1276.9	37.7031
											1333.2	36.4558	1282.7	37.7393
											1333.6	36.4907	1288.1	37.7754
											1338.2	36.5257	1290	37.8115
											1341.4	36.5956	1290.1	37.8476
											1342.7	36.6305	1290.4	37.9559
											1344.4	36.6655	1292.9	37.9921
											1345.4	36.7005	1298.9	38.0282
											1346.1	36.7354	1300.6	38.0643
											1352	36.7704	1301	38.1004
											1364	36.8053	1304	38.1365
											1365	36.8403	1309.7	38.1726
											1366.3	36.8752	1309.9	38.2087
											1367.1	36.9102	1311.4	38.2449
											1368	36.9451	1311.7	38.281
											1371.1	36.9801	1312.9	38.3171
											1371.5	37.015	1313.2	38.3532
											1372.9	37.05	1314.5	38.3893
											1374	37.0849	1318.1	38.4615
											1374.9	37.1199	1320.4	38.4977
											1377.3	37.1548	1320.6	38.5338
											1377.5	37.1898	1321.5	38.5699
											1381.9	37.2247	1323.2	38.606
											1383.3	37.2597	1323.9	38.6421
											1383.9	37.2947	1324.4	38.6782
											1384.3	37.3296	1325.1	38.7143
											1386.5	37.3646	1329.7	38.7505
											1387.9	37.4345	1330.8	38.7866
											1389.4	37.4694	1332	38.8227
											1392.6	37.5393	1332.3	38.8588
											1392.9	37.5743	1334.3	38.8949
											1398.4	37.6092	1336.2	38.9671
											1398.7	37.6442	1336.6	39.0033
											1399.3	37.6791	1341.6	39.0394
											1401.2	37.7141	1343.7	39.0755
											1401.7	37.749	1345.1	39.1116
											1402.2	37.784	1350	39.1477
											1411.8	37.8189	1352.7	39.1838
											1414.3	37.8539	1356.6	39.2199
											1416.2	37.8889	1359.4	39.256
											1423.5	37.9238	1361.4	39.2922
											1428.1	37.9588	1363.5	39.3283
											1430.4	37.9937	1363.9	39.3644
											1431.7	38.0287	1364.3	39.4005
											1432.6	38.0636	1365.3	39.4366
											1437.4	38.0986	1366	39.4727
											1439.7	38.1335	1367	39.5088
											1442.5	38.1685	1369.5	39.545
											1443.5	38.2034	1370.2	39.5811
											1444.2	38.2384	1374.4	39.6172
											1445.2	38.2733	1375.8	39.6533
											1448	38.3083	1381	39.6894
											1449	38.3432	1382	39.7255
											1450.8	38.3782	1382.5	39.7616
											1452.1	38.4131	1383.3	39.7978
											1452.3	38.4481	1384	39.8339
											1454.7	38.483	1395.4	39.87
											1455.5	38.518	1399.3	39.9061
											1456.2	38.553	1399.8	39.9422
											1462.6	38.5879	1402.8	39.9783
											1464	38.6229	1404	40.0144
											1464.5	38.6578	1411.7	40.0506
											1466.6	38.6928	1413.5	40.0867
											1466.8	38.7277	1413.7	40.1228
											1468.1	38.7627	1414.5	40.1589
											1468.6	38.7976	1419.1	40.195
											1469.3	38.8326	1421.2	40.2311
											1474.2	38.8675	1424.1	40.2672
											1475.3	38.9025	1425.2	40.3034
											1476.9	38.9374	1426.3	40.3395
											1477.9	38.9724	1426.7	40.3756
											1480.5	39.0073	1434.2	40.4117
											1482.2	39.0423	1435.3	40.4478
											1486.4	39.0772	1440.4	40.4839
											1488.8	39.1122	1442.5	40.52
											1489.1	39.1472	1444.5	40.5562
											1493	39.1821	1448.6	40.5923
											1495.3	39.2171	1453.9	40.6284
											1497.2	39.252	1454.5	40.6645
											1497.4	39.287	1456.9	40.7006
											1498.1	39.3219	1458.6	40.7367
											1498.2	39.3569	1458.8	40.7728
											1498.4	39.3918	1460.2	40.8451
											1500.9	39.4268	1461.4	40.8812
											1502.2	39.4617	1463.3	40.9173
											1502.5	39.4967	1464.3	40.9534
											1505.6	39.5316	1466.3	40.9895
											1507.1	39.5666	1466.7	41.0256
											1507.3	39.6015	1474.9	41.0618
											1507.8	39.6365	1475.4	41.0979
											1507.9	39.6714	1476.4	41.134
											1510.4	39.7064	1477.2	41.1701
											1511.7	39.7413	1479.5	41.2062
											1514.7	39.7763	1480.8	41.2423
											1517.1	39.8113	1482.1	41.2784
											1518.9	39.8462	1482.2	41.3146
											1519.5	39.8812	1486.1	41.3507
											1520.9	39.9161	1487.1	41.3868
											1523.7	39.9511	1487.2	41.4229
											1529.6	39.986	1487.7	41.459
											1534.8	40.021	1490	41.4951
											1535.9	40.0559	1494.5	41.5312
											1536.1	40.0909	1497.5	41.5674
											1536.4	40.1258	1500.7	41.6035
											1539	40.1608	1505.3	41.6396
											1539.1	40.1957	1506.5	41.6757
											1540.2	40.2307	1510.1	41.7118
											1545.7	40.2656	1513.5	41.7479
											1547.5	40.3006	1514	41.784
											1548.3	40.3355	1514.8	41.8202
											1549.9	40.3705	1515.3	41.8563
											1550.3	40.4055	1515.7	41.8924
											1551.5	40.4404	1521.6	41.9285
											1552	40.4754	1524.2	41.9646
											1552.2	40.5103	1524.5	42.0007
											1555.6	40.5453	1528.3	42.0368
											1555.9	40.5802	1529.7	42.073
											1557.2	40.6152	1534.9	42.1091
											1557.9	40.6501	1536.3	42.1452
											1560.3	40.6851	1538.6	42.1813
											1562.5	40.72	1539.9	42.2535
											1564.5	40.755	1540.8	42.2896
											1568.8	40.8249	1543.8	42.3257
											1570.8	40.8598	1547.8	42.3619
											1572.6	40.8948	1548.8	42.398
											1575.1	40.9297	1548.9	42.4341
											1575.4	40.9647	1553	42.4702
											1579.7	40.9997	1553.4	42.5063
											1581.3	41.0346	1556.5	42.5424
											1581.4	41.0696	1559.5	42.5785
											1589.4	41.1045	1561.1	42.6147
											1589.7	41.1395	1561.2	42.6508
											1590.3	41.1744	1562	42.6869
											1591	41.2094	1567.4	42.723
											1592.3	41.2443	1572.3	42.7591
											1598.6	41.2793	1575.9	42.7952
											1604.7	41.3142	1580.4	42.8313
											1605.8	41.3492	1582.2	42.8675
											1606.1	41.4191	1586.2	42.9036
											1612.9	41.454	1588.7	42.9397
											1615.3	41.489	1592.3	42.9758
											1616	41.5239	1592.6	43.0119
											1616.1	41.5589	1596.4	43.048
											1616.5	41.5938	1598.2	43.0841
											1623.5	41.6288	1598.3	43.1203
											1624.7	41.6638	1599.4	43.1564
											1625.7	41.6987	1600.9	43.1925
											1626	41.7337	1606.9	43.2286
											1633.3	41.7686	1611.8	43.2647
											1633.9	41.8036	1612.3	43.3008
											1636.5	41.8385	1620.7	43.3369
											1636.9	41.8735	1620.9	43.3731
											1640.9	41.9084	1623.6	43.4092
											1641.6	41.9434	1624	43.4453
											1653.2	41.9783	1624.8	43.4814
											1654.5	42.0133	1625.4	43.5175
											1654.6	42.0482	1627	43.5536
											1654.7	42.0832	1629.4	43.5897
											1657.2	42.1181	1631.9	43.6259
											1657.4	42.1531	1632.3	43.662
											1658.2	42.188	1633	43.6981
											1666.7	42.223	1637.3	43.7703
											1670	42.258	1637.9	43.8064
											1672.8	42.2929	1641.3	43.8425
											1674.2	42.3628	1641.8	43.8787
											1674.3	42.3978	1641.9	43.9148
											1675	42.4327	1642.7	43.9509
											1675.7	42.5026	1643.1	43.987
											1678.9	42.5376	1645.5	44.0231
											1680.1	42.5725	1646.2	44.0592
											1680.3	42.6075	1648.5	44.0953
											1680.6	42.6424	1649.3	44.1315
											1681	42.6774	1651	44.1676
											1684.6	42.7123	1652.9	44.2037
											1686.2	42.7473	1653.2	44.2398
											1688.1	42.7822	1655.1	44.2759
											1688.5	42.8172	1655.9	44.312
											1697.5	42.8521	1659.7	44.3481
											1701.2	42.8871	1663.1	44.3843
											1702	42.9221	1665	44.4204
											1703.4	42.957	1666.3	44.4565
											1706.7	42.992	1669	44.5648
											1707.6	43.0269	1670.6	44.6009
											1708.3	43.0619	1679.2	44.6371
											1709.1	43.0968	1683.4	44.6732
											1710.7	43.1318	1684	44.7093
											1712.3	43.1667	1684.6	44.7454
											1713.7	43.2017	1689.3	44.7815
											1713.9	43.2366	1689.6	44.8176
											1715.7	43.2716	1690.5	44.8537
											1716.8	43.3065	1691.8	44.8899
											1721.7	43.3415	1694.5	44.926
											1723.8	43.3764	1702.1	44.9621
											1724.5	43.4114	1704.4	44.9982
											1726.7	43.4463	1705.9	45.0343
											1733.8	43.4813	1709.2	45.0704
											1737.3	43.5163	1709.5	45.1065
											1745.3	43.5512	1713.4	45.1427
											1745.9	43.5862	1713.7	45.1788
											1746.6	43.6211	1722.4	45.2149
											1746.9	43.6561	1724.9	45.251
											1747	43.691	1730	45.2871
											1753.3	43.726	1732.4	45.3232
											1754.9	43.7609	1735.7	45.3593
											1760.6	43.7959	1739.4	45.3954
											1769.1	43.8308	1749.8	45.4316
											1770.1	43.8658	1750.8	45.4677
											1770.6	43.9007	1752.5	45.5038
											1771	43.9357	1752.7	45.5399
											1774.3	43.9706	1754.3	45.576
											1774.4	44.0056	1756.3	45.6121
											1776.8	44.0405	1759.1	45.6482
											1782	44.0755	1760.3	45.6844
											1782.3	44.1105	1763	45.7205
											1784.3	44.1454	1764.2	45.7566
											1788.1	44.2153	1767.8	45.7927
											1789.9	44.2503	1769.8	45.8288
											1791.8	44.2852	1776	45.8649
											1797.2	44.3202	1778.7	45.901
											1799.9	44.3551	1781.4	45.9372
											1803.1	44.3901	1789.2	45.9733
											1805	44.425	1792.3	46.0094
											1805.8	44.46	1793.2	46.0455
											1806.2	44.4949	1793.8	46.0816
											1806.5	44.5299	1795.9	46.1177
											1810.7	44.5648	1797	46.1538
											1816.3	44.5998	1797.1	46.19
											1820.1	44.6347	1802	46.2261
											1821.8	44.6697	1803.5	46.2622
											1824.7	44.7046	1803.7	46.2983
											1826.7	44.7396	1807	46.3344
											1828.7	44.7746	1808.1	46.3705
											1831.9	44.8095	1809.3	46.4066
											1832.6	44.8445	1812.1	46.4428
											1839	44.8794	1816	46.4789
											1841.2	44.9144	1819.2	46.515
											1842.1	44.9493	1821.2	46.5511
											1843.5	44.9843	1823.3	46.5872
											1845.8	45.0192	1826.2	46.6233
											1846.3	45.0542	1826.6	46.6594
											1848.1	45.0891	1829.2	46.6956
											1848.6	45.1241	1835.4	46.7317
											1851.3	45.159	1842.1	46.7678
											1851.5	45.194	1843.3	46.8039
											1851.8	45.2289	1844.7	46.84
											1852.3	45.2639	1844.9	46.8761
											1855.1	45.3338	1847.7	46.9122
											1858.3	45.3688	1848.7	46.9484
											1865	45.4037	1849.2	46.9845
											1865.3	45.4387	1849.5	47.0206
											1866.2	45.4736	1850	47.0567
											1868.9	45.5086	1851.4	47.0928
											1870.1	45.5435	1854.7	47.1289
											1871.4	45.5785	1864.2	47.165
											1872.6	45.6134	1864.4	47.2012
											1872.8	45.6484	1865.7	47.2373
											1874.1	45.6833	1868.8	47.2734
											1876	45.7183	1869.5	47.3095
											1877.2	45.7532	1873.4	47.3456
											1878.1	45.7882	1877.8	47.3817
											1879.4	45.8231	1880.1	47.4178
											1881.4	45.8581	1884.5	47.454
											1886.6	45.893	1884.6	47.4901
											1888.2	45.928	1895.3	47.5262
											1888.9	45.963	1895.6	47.5623
											1890.1	46.0329	1896.1	47.5984
											1893.9	46.0678	1898.2	47.6345
											1894.3	46.1028	1900.1	47.6706
											1900.6	46.1377	1903.6	47.7068
											1904.3	46.1727	1903.7	47.7429
											1906.8	46.2076	1906.7	47.779
											1907.6	46.2426	1912.5	47.8151
											1908	46.2775	1913	47.8512
											1908.5	46.3125	1913.5	47.8873
											1908.7	46.3474	1916.6	47.9234
											1909.9	46.3824	1918	47.9596
											1910.2	46.4173	1924.6	47.9957
											1913.6	46.4523	1925.1	48.0318
											1914.8	46.4872	1926.6	48.0679
											1915	46.5222	1930.7	48.104
											1916.3	46.5571	1932.4	48.1401
											1917.3	46.5921	1932.8	48.1762
											1918.1	46.6271	1933	48.2124
											1919.8	46.662	1933.6	48.2485
											1920	46.697	1935.9	48.2846
											1927.8	46.7319	1937	48.3207
											1929	46.7669	1940.7	48.3568
											1929.8	46.8018	1941.3	48.3929
											1930.9	46.8368	1942.3	48.429
											1934.6	46.8717	1944.2	48.4651
											1938.4	46.9067	1945.3	48.5013
											1940.1	46.9416	1945.4	48.5374
											1942.4	46.9766	1947.1	48.5735
											1944.2	47.0115	1952.4	48.6096
											1945.5	47.0465	1958.5	48.6457
											1947.7	47.0814	1958.8	48.6818
											1948.8	47.1164	1958.9	48.7179
											1951.2	47.1513	1959.5	48.7541
											1954.3	47.1863	1960.1	48.7902
											1955.4	47.2213	1964.6	48.8263
											1959	47.2562	1967.7	48.8624
											1959.7	47.2912	1972	48.8985
											1959.9	47.3261	1972.3	48.9346
											1960.5	47.3611	1974.8	49.0069
											1962.7	47.396	1975.5	49.043
											1963.9	47.431	1975.6	49.0791
											1966.9	47.4659	1979.8	49.1152
											1967.6	47.5009	1989.8	49.1513
											1968	47.5358	1990.9	49.1874
											1974.5	47.5708	1996.9	49.2235
											1974.7	47.6057	2000.9	49.2597
											1974.9	47.6407	2002	49.2958
											1976.9	47.6756	2003.8	49.3319
											1977.5	47.7106	2004.1	49.368
											1985.5	47.7455	2005.7	49.4041
											1986.5	47.8154	2006.7	49.4402
											1987.3	47.8504	2012.2	49.4763
											1987.9	47.8854	2019.8	49.5125
											1989.5	47.9203	2024.9	49.5486
											1991.6	47.9553	2026.6	49.5847
											1992.3	47.9902	2030.6	49.6208
											1996.9	48.0252	2030.7	49.6569
											1997.4	48.0601	2031.2	49.693
											2000.4	48.0951	2037.9	49.7291
											2000.5	48.13	2039.3	49.7653
											2001.3	48.165	2039.4	49.8014
											2002.1	48.1999	2042.3	49.8375
											2002.6	48.2349	2043.9	49.8736
											2004.8	48.2698	2044.3	49.9097
											2013.1	48.3048	2045	49.9458
											2015.2	48.3397	2045.1	49.9819
											2015.5	48.3747	2047.5	50.0181
											2017.7	48.4096	2049.1	50.0542
											2018.8	48.4446	2051.2	50.0903
											2021.2	48.4796	2051.8	50.1264
											2021.6	48.5145	2053	50.1625
											2023.9	48.5495	2053.5	50.1986
											2026.3	48.5844	2060.7	50.2347
											2026.4	48.6194	2066.4	50.2709
											2036.3	48.6543	2069.2	50.307
											2040.6	48.6893	2070.4	50.3431
											2041	48.7242	2072.5	50.3792
											2041.9	48.7592	2080.1	50.4153
											2043.6	48.7941	2081.9	50.4514
											2046.8	48.8291	2084.2	50.4875
											2049.9	48.864	2090.4	50.5237
											2050.9	48.899	2091.9	50.5598
											2051.4	48.9339	2094.3	50.5959
											2051.6	48.9689	2097.6	50.632
											2052.8	49.0038	2101.6	50.6681
											2056.8	49.0738	2105.2	50.7042
											2059.7	49.1087	2111.8	50.7403
											2060.8	49.1437	2124.4	50.7765
											2062	49.1786	2125.2	50.8126
											2062.7	49.2136	2129.5	50.8487
											2063.7	49.2485	2129.9	50.8848
											2067.6	49.2835	2130.2	50.9209
											2069.3	49.3184	2134.3	50.957
											2070	49.3534	2136	51.0293
											2071.5	49.3883	2139.6	51.0654
											2073.8	49.4233	2144.3	51.1015
											2074.5	49.4582	2145.5	51.1376
											2074.7	49.4932	2147.5	51.1737
											2076.8	49.5281	2149.3	51.2098
											2079.6	49.5631	2151.3	51.2459
											2084.5	49.598	2152.6	51.2821
											2089.6	49.633	2156.1	51.3182
											2091	49.6679	2164.8	51.3543
											2093.9	49.7029	2168.4	51.3904
											2106.1	49.7379	2174.9	51.4265
											2106.8	49.7728	2176.7	51.4626
											2107.4	49.8078	2182.5	51.4987
											2108	49.8427	2187	51.5349
											2108.8	49.8777	2188	51.571
											2112.5	49.9126	2190.1	51.6071
											2113.4	49.9476	2197.1	51.6432
											2114.7	49.9825	2201.2	51.6793
											2118.3	50.0175	2208	51.7154
											2121.9	50.0524	2216	51.7515
											2129.2	50.0874	2216.9	51.7876
											2131.5	50.1223	2217	51.8238
											2131.6	50.1573	2217.6	51.8599
											2135	50.1922	2220.4	51.896
											2135.1	50.2272	2225.7	51.9321
											2136	50.2621	2229.6	51.9682
											2136.2	50.2971	2231.6	52.0043
											2136.6	50.3321	2232	52.0404
											2137.8	50.367	2233.5	52.0766
											2139.4	50.402	2234.8	52.1127
											2144.9	50.4369	2236.4	52.1488
											2145.1	50.4719	2242.5	52.1849
											2150.8	50.5068	2243.3	52.221
											2153.6	50.5418	2243.5	52.2571
											2155.6	50.5767	2245.6	52.2932
											2167.4	50.6117	2245.8	52.3294
											2168.1	50.6466	2252.2	52.3655
											2169.2	50.6816	2254.3	52.4016
											2171.6	50.7165	2259.5	52.4377
											2171.8	50.7515	2260.5	52.4738
											2176.9	50.7864	2267.8	52.5099
											2177.4	50.8214	2268.9	52.546
											2179.9	50.8563	2272	52.5822
											2183.2	50.8913	2273.4	52.6183
											2185.1	50.9262	2286.3	52.6544
											2192.8	50.9612	2294.9	52.6905
											2198.8	50.9962	2299.4	52.7266
											2205.4	51.0311	2302.3	52.7627
											2210.2	51.0661	2306	52.7988
											2211.9	51.101	2307.9	52.835
											2213.9	51.136	2312.6	52.8711
											2214.5	51.1709	2313.5	52.9072
											2216	51.2059	2321.1	52.9433
											2216.4	51.2408	2324.7	52.9794
											2217.8	51.2758	2328.6	53.0155
											2218.8	51.3107	2334	53.0516
											2223.3	51.3457	2343.1	53.0878
											2224.4	51.3806	2343.6	53.1239
											2226.4	51.4156	2346.1	53.16
											2227.1	51.4505	2350.6	53.1961
											2232.5	51.4855	2350.9	53.2322
											2235.9	51.5204	2356.6	53.2683
											2239.7	51.5554	2357.8	53.3044
											2241.2	51.5904	2359.8	53.3406
											2246.4	51.6253	2364.4	53.3767
											2251.2	51.6603	2368.9	53.4128
											2256.5	51.6952	2371.8	53.4489
											2257.4	51.7302	2371.9	53.485
											2258.5	51.7651	2373.3	53.5211
											2259.9	51.8001	2374.7	53.5572
											2261.3	51.835	2375.1	53.5934
											2262.8	51.87	2378.6	53.6295
											2272.8	51.9049	2380.2	53.6656
											2276.4	51.9399	2381.5	53.7017
											2279.9	51.9748	2383.6	53.7378
											2280.3	52.0098	2387	53.7739
											2282	52.0447	2392.9	53.81
											2283.9	52.0797	2395.1	53.8462
											2291.3	52.1146	2395.6	53.8823
											2291.4	52.1496	2396.7	53.9184
											2296.8	52.1846	2398.4	53.9545
											2300.1	52.2195	2399	53.9906
											2305.1	52.2545	2399.7	54.0267
											2311	52.2894	2399.8	54.099
											2311.2	52.3244	2399.9	54.1351
											2313.6	52.3593	2409	54.1712
											2315.6	52.3943	2409.3	54.2073
											2316.1	52.4292	2413.6	54.2434
											2326.4	52.4642	2414.2	54.2795
											2331.1	52.4991	2414.3	54.3156
											2332	52.5341	2416.2	54.3518
											2333.6	52.569	2418.5	54.3879
											2340.5	52.604	2422.2	54.424
											2346.4	52.6389	2429.6	54.4601
											2347.8	52.6739	2430.4	54.4962
											2349	52.7088	2431.7	54.5323
											2354.3	52.7438	2436	54.5684
											2358.1	52.7787	2442	54.6046
											2359.2	52.8137	2443.1	54.6407
											2363.2	52.8487	2444.6	54.6768
											2365.1	52.8836	2445	54.7129
											2370.2	52.9186	2459.8	54.749
											2371.6	52.9535	2462.8	54.7851
											2373.3	52.9885	2469	54.8212
											2373.5	53.0234	2477	54.8573
											2375.3	53.0584	2477.5	54.8935
											2376.9	53.0933	2479.5	54.9296
											2378.5	53.1283	2480.5	54.9657
											2378.6	53.1632	2482.3	55.0018
											2389.1	53.1982	2482.4	55.0379
											2391.7	53.2331	2484.4	55.074
											2394.2	53.2681	2487.5	55.1101
											2397.7	53.303	2493.2	55.1463
											2403.4	53.338	2493.9	55.1824
											2406.7	53.3729	2495.2	55.2185
											2409.2	53.4079	2503.3	55.2546
											2410.6	53.4429	2503.9	55.2907
											2410.8	53.4778	2506.1	55.3268
											2411.8	53.5128	2507.5	55.3629
											2413	53.5477	2519.7	55.3991
											2414.2	53.5827	2523.3	55.4352
											2417.4	53.6176	2524.9	55.4713
											2417.5	53.6526	2529.5	55.5074
											2422.1	53.6875	2530.1	55.5435
											2426.8	53.7225	2531.6	55.5796
											2428	53.7574	2540.2	55.6157
											2429.7	53.7924	2543.1	55.6519
											2434.6	53.8273	2548.2	55.688
											2437.2	53.8623	2551.2	55.7602
											2437.5	53.8972	2552.4	55.7963
											2441	53.9322	2554.2	55.8324
											2444.9	53.9671	2556.1	55.8685
											2446.8	54.0021	2560.9	55.9047
											2449.3	54.037	2562.9	55.9408
											2451.1	54.072	2569.5	55.9769
											2453.6	54.107	2571.7	56.013
											2455.2	54.1419	2580.4	56.0491
											2458.7	54.1769	2585.1	56.0852
											2460.4	54.2118	2585.3	56.1213
											2461.1	54.2468	2586.4	56.1575
											2463.6	54.2817	2586.7	56.1936
											2468	54.3167	2587.1	56.2297
											2471	54.3516	2588.6	56.2658
											2474.1	54.3866	2589	56.3019
											2475.8	54.4215	2589.3	56.338
											2477.6	54.4565	2601.9	56.3741
											2478.7	54.4914	2602.4	56.4103
											2482	54.5264	2603.1	56.4464
											2482.7	54.5613	2608.3	56.4825
											2482.8	54.5963	2611.2	56.5186
											2500.3	54.6312	2620	56.5547
											2500.8	54.6662	2621.8	56.5908
											2503.1	54.7012	2622.1	56.6269
											2506.4	54.7361	2623.4	56.6631
											2507.4	54.7711	2625	56.6992
											2509.8	54.806	2628	56.7353
											2510.8	54.841	2628.6	56.7714
											2513.6	54.8759	2630	56.8075
											2517	54.9109	2630.8	56.8436
											2522.3	54.9458	2639.2	56.8797
											2522.4	54.9808	2639.6	56.9159
											2525.1	55.0157	2640.5	56.952
											2525.3	55.0507	2644.3	56.9881
											2544.3	55.0856	2651.6	57.0242
											2547.6	55.1206	2656.1	57.0603
											2548.2	55.1555	2657.5	57.0964
											2548.7	55.1905	2658.2	57.1325
											2549	55.2254	2660.2	57.1687
											2556.3	55.2604	2666.4	57.2048
											2558.1	55.2954	2668.3	57.2409
											2558.4	55.3303	2669.6	57.277
											2564.1	55.3653	2672.6	57.3131
											2566.9	55.4002	2674.7	57.3492
											2567.2	55.4352	2674.8	57.3853
											2568.1	55.4701	2678.4	57.4215
											2569.9	55.5051	2680.2	57.4576
											2571.8	55.54	2682.1	57.4937
											2574.4	55.575	2682.6	57.5298
											2576.5	55.6099	2684.3	57.5659
											2578.9	55.6449	2690.8	57.602
											2581.7	55.6798	2697	57.6381
											2583.2	55.7148	2699.3	57.6743
											2587.7	55.7497	2700.8	57.7104
											2588.2	55.7847	2702.2	57.7465
											2589.7	55.8196	2704.8	57.7826
											2591.9	55.8546	2710.5	57.8187
											2600	55.8895	2720.5	57.8548
											2602.5	55.9245	2721.5	57.8909
											2604.7	55.9595	2730.6	57.927
											2606.8	55.9944	2732.3	57.9632
											2607.5	56.0294	2733.4	57.9993
											2612.1	56.0643	2737.4	58.0354
											2615.1	56.0993	2738	58.1076
											2616.7	56.1342	2750.6	58.1437
											2622.9	56.1692	2756.7	58.1798
											2625	56.2041	2757.7	58.216
											2627.2	56.2391	2758	58.2521
											2629.8	56.274	2764.1	58.2882
											2631.4	56.309	2769.1	58.3243
											2634.8	56.3439	2782.3	58.3604
											2634.9	56.3789	2783.1	58.3965
											2636.5	56.4138	2788	58.4326
											2637	56.4488	2789.5	58.4688
											2638.1	56.4837	2792.8	58.5049
											2646	56.5187	2793.1	58.541
											2650.5	56.5537	2795.8	58.5771
											2651.7	56.5886	2802.7	58.6132
											2663.2	56.6236	2803.9	58.6493
											2663.7	56.6585	2804.8	58.6854
											2664.4	56.7284	2807.9	58.7216
											2669.3	56.7634	2808.6	58.7577
											2672.2	56.7983	2809.2	58.7938
											2676.9	56.8333	2810	58.8299
											2681.7	56.8682	2817.1	58.866
											2682.6	56.9032	2818.7	58.9021
											2694	56.9381	2823	58.9382
											2694.8	56.9731	2828.9	58.9744
											2702.8	57.008	2829	59.0105
											2706.6	57.043	2829.8	59.0466
											2711.2	57.0779	2845	59.0827
											2713.4	57.1129	2849.8	59.1188
											2721.8	57.1479	2854.4	59.1549
											2728.4	57.1828	2856.5	59.191
											2729.9	57.2178	2857.5	59.2272
											2731.2	57.2527	2859.7	59.2633
											2737.3	57.2877	2861.8	59.2994
											2737.5	57.3226	2862.7	59.3355
											2738.2	57.3576	2865.2	59.3716
											2738.5	57.3925	2866.3	59.4077
											2740.8	57.4275	2870.9	59.4438
											2741.3	57.4624	2873	59.48
											2745.1	57.4974	2874.1	59.5161
											2745.2	57.5323	2878	59.5522
											2746.3	57.5673	2878.8	59.5883
											2746.8	57.6022	2879.2	59.6244
											2750.5	57.6372	2882.1	59.6605
											2752.5	57.6721	2887.8	59.6966
											2753.8	57.7071	2890.8	59.7328
											2762.4	57.742	2890.9	59.7689
											2762.9	57.812	2893.4	59.805
											2764.7	57.8469	2904.4	59.8411
											2772.6	57.8819	2916.5	59.8772
											2773.2	57.9168	2917.2	59.9133
											2774.4	57.9518	2920.9	59.9494
											2779.6	57.9867	2922.4	59.9856
											2782.9	58.0217	2925	60.0578
											2784.8	58.0566	2925.5	60.13
											2785.6	58.0916	2931.7	60.1661
											2786.1	58.1265	2942.7	60.2022
											2790	58.1615	2948.5	60.2384
											2800.1	58.1964	2948.7	60.2745
											2802.8	58.2314	2952.1	60.3106
											2804	58.2663	2958	60.3467
											2806.2	58.3013	2969	60.3828
											2813.9	58.3362	2978.4	60.4189
											2816.6	58.3712	2985.9	60.455
											2820.8	58.4062	2991.4	60.4912
											2827.4	58.4411	2992.4	60.5273
											2828.2	58.4761	2994.4	60.5634
											2828.8	58.511	3002.3	60.5995
											2830	58.546	3005.3	60.6356
											2837.1	58.5809	3008	60.6717
											2846.2	58.6159	3011.7	60.7078
											2846.3	58.6508	3017.8	60.744
											2848.6	58.6858	3018.2	60.8162
											2850.1	58.7207	3023.7	60.8523
											2852.8	58.7557	3027.1	60.8884
											2856.8	58.7906	3027.9	60.9245
											2857.3	58.8256	3030.8	60.9606
											2861.7	58.8605	3035.6	60.9967
											2865	58.8955	3038.3	61.0329
											2882.5	58.9304	3038.5	61.069
											2886.4	58.9654	3039.8	61.1051
											2887.4	59.0003	3040.1	61.1412
											2888.2	59.0353	3059.7	61.1773
											2890.7	59.0703	3060	61.2134
											2899.5	59.1402	3062.8	61.2495
											2904.3	59.1751	3064.2	61.2857
											2910.7	59.245	3069.6	61.3218
											2911.1	59.28	3076.2	61.3579
											2911.5	59.3149	3080.6	61.394
											2927.3	59.3499	3081.7	61.4301
											2928.5	59.3848	3082.6	61.4662
											2930.6	59.4198	3089.1	61.5023
											2931.5	59.4547	3091	61.5385
											2939.7	59.4897	3094.7	61.5746
											2940.2	59.5246	3095.3	61.6107
											2940.3	59.5596	3096.5	61.6468
											2945.4	59.5945	3097.9	61.6829
											2947.4	59.6295	3098	61.719
											2955.9	59.6645	3098.2	61.7551
											2961.3	59.6994	3099.4	61.7913
											2962.4	59.7344	3107.1	61.8274
											2964.5	59.7693	3112.8	61.8635
											2965.6	59.8043	3113.8	61.8996
											2977.4	59.8392	3118.6	61.9357
											2983.4	59.8742	3121.8	61.9718
											2987.7	59.9091	3123.4	62.0079
											3000.9	59.9441	3125.2	62.0441
											3002.9	59.979	3125.3	62.0802
											3003.8	60.014	3125.5	62.1163
											3004.6	60.0489	3126.7	62.1524
											3004.7	60.0839	3132.5	62.1885
											3007.6	60.1188	3136.8	62.2246
											3008	60.1538	3142.1	62.2607
											3020.3	60.1887	3144.4	62.2969
											3021.2	60.2237	3155.7	62.333
											3030.5	60.2587	3159.3	62.3691
											3032.7	60.2936	3160.8	62.4052
											3034.3	60.3286	3165.5	62.4413
											3037.7	60.3635	3172.4	62.4774
											3045.4	60.3985	3174.1	62.5135
											3050.7	60.4334	3176.1	62.5497
											3052.7	60.4684	3177	62.5858
											3053.3	60.5033	3177.8	62.6219
											3058.8	60.5383	3180.5	62.658
											3060.8	60.5732	3180.7	62.6941
											3062.4	60.6082	3184.4	62.7302
											3065.4	60.6431	3201.5	62.7663
											3079.1	60.6781	3203.3	62.8025
											3080.7	60.713	3207.2	62.8386
											3085.5	60.748	3212.1	62.8747
											3086.8	60.7829	3218.4	62.9108
											3087	60.8179	3222	62.9469
											3087.6	60.8528	3226.5	62.983
											3089.7	60.8878	3227	63.0191
											3089.9	60.9228	3231.6	63.0553
											3090	60.9577	3231.9	63.0914
											3093.3	60.9927	3236.9	63.1275
											3100.9	61.0276	3243.5	63.1636
											3102.8	61.0626	3247	63.1997
											3104.8	61.0975	3247.7	63.2358
											3105.3	61.1325	3248.6	63.2719
											3106.2	61.1674	3254.1	63.3081
											3109.2	61.2024	3261.7	63.3442
											3109.7	61.2373	3262	63.3803
											3113.2	61.2723	3263.4	63.4164
											3116.4	61.3072	3264.7	63.4525
											3119.4	61.3422	3265	63.4886
											3128.3	61.3771	3265.1	63.5247
											3130.5	61.4121	3267.5	63.5609
											3132.1	61.447	3274.7	63.597
											3136.6	61.482	3276.8	63.6331
											3138.9	61.517	3277.9	63.6692
											3140.9	61.5519	3284.2	63.7053
											3141.4	61.5869	3285.8	63.7414
											3143	61.6218	3287.4	63.7775
											3150	61.6568	3292.1	63.8137
											3169	61.6917	3304.1	63.8498
											3174.5	61.7616	3305.7	63.8859
											3183.6	61.7966	3309.4	63.922
											3186.4	61.8315	3311.7	63.9581
											3190.1	61.8665	3326	63.9942
											3190.2	61.9014	3334.1	64.0303
											3195.3	61.9364	3338.2	64.0664
											3196	61.9713	3339.2	64.1026
											3201.4	62.0063	3340.1	64.1387
											3204.7	62.0412	3340.9	64.1748
											3210.2	62.0762	3341.1	64.2109
											3210.6	62.1111	3341.6	64.247
											3218.2	62.1461	3348.2	64.2831
											3224.4	62.1811	3350.4	64.3192
											3227.1	62.216	3360.3	64.3554
											3229.5	62.251	3361.1	64.3915
											3236	62.2859	3361.4	64.4276
											3238.5	62.3209	3363.1	64.4637
											3240.2	62.3558	3366.7	64.4998
											3240.4	62.3908	3366.9	64.5359
											3242.6	62.4257	3375.1	64.572
											3247.1	62.4607	3376.5	64.6082
											3258.5	62.4956	3394.8	64.6443
											3262.2	62.5306	3403.2	64.6804
											3263.4	62.5655	3405.2	64.7165
											3267.8	62.6005	3405.4	64.7526
											3269.5	62.6354	3416	64.7887
											3269.6	62.6704	3416.2	64.8248
											3275.9	62.7053	3417	64.861
											3276.3	62.7403	3418.2	64.8971
											3276.4	62.7753	3424.1	64.9332
											3279.3	62.8102	3425.3	64.9693
											3283.7	62.8452	3426.7	65.0054
											3287	62.8801	3430.7	65.0415
											3287.7	62.9151	3439.4	65.0776
											3287.8	62.95	3441.2	65.1138
											3288.4	62.985	3441.5	65.1499
											3294.9	63.0199	3441.7	65.186
											3298.1	63.0549	3443.5	65.2221
											3302.1	63.0898	3451.7	65.2582
											3307.5	63.1248	3455.1	65.2943
											3317.7	63.1597	3456.7	65.3304
											3326.1	63.1947	3457.7	65.3666
											3328.3	63.2296	3466.7	65.4027
											3331.3	63.2646	3468.8	65.4388
											3331.8	63.2995	3473.5	65.4749
											3332.6	63.3345	3479.4	65.511
											3335.5	63.3695	3481	65.5471
											3344.6	63.4044	3486.7	65.5832
											3348.7	63.4394	3486.8	65.6194
											3349.6	63.4743	3496.7	65.6555
											3351.9	63.5093	3496.8	65.6916
											3356.5	63.5442	3499.5	65.7277
											3361.3	63.5792	3501.8	65.7638
											3362	63.6141	3504.2	65.7999
											3363.1	63.6491	3509.3	65.836
											3363.3	63.684	3514.3	65.8722
											3363.5	63.719	3518.9	65.9083
											3363.6	63.7539	3521.8	65.9444
											3365.9	63.7889	3547.5	65.9805
											3370.2	63.8238	3557.7	66.0166
											3370.7	63.8588	3568.1	66.0527
											3375.3	63.8937	3576.4	66.0888
											3376.2	63.9287	3578.1	66.125
											3377	63.9636	3584.1	66.1611
											3378.2	63.9986	3587.4	66.1972
											3383.1	64.0336	3594.7	66.2333
											3386.9	64.0685	3594.8	66.2694
											3387.3	64.1035	3602.6	66.3055
											3400.1	64.1384	3604.2	66.3416
											3408	64.1734	3608.8	66.3778
											3411.4	64.2083	3610	66.4139
											3415	64.2433	3610.9	66.45
											3419.9	64.2782	3615.5	66.4861
											3423	64.3132	3616.1	66.5222
											3423.2	64.3831	3622.4	66.5583
											3427.1	64.418	3627.4	66.6306
											3433.5	64.453	3629.1	66.6667
											3436.3	64.4879	3630.8	66.7028
											3437.2	64.5229	3638.5	66.7389
											3438.6	64.5578	3640.6	66.775
											3442.4	64.5928	3644.4	66.8111
											3454.3	64.6278	3647.3	66.8472
											3456.5	64.6627	3647.6	66.8834
											3461.5	64.6977	3651.8	66.9195
											3463	64.7326	3652.3	66.9556
											3463.5	64.7676	3656.5	66.9917
											3470.9	64.8025	3659.7	67.0278
											3471.3	64.8375	3667.1	67.0639
											3473.8	64.8724	3682	67.1
											3474.5	64.9074	3686.3	67.1362
											3475.7	64.9423	3688.1	67.1723
											3476	64.9773	3692.6	67.2084
											3477.7	65.0122	3695.5	67.2445
											3496.1	65.0472	3696.9	67.2806
											3504	65.0821	3699.8	67.3167
											3507	65.1171	3716.6	67.3528
											3512.5	65.152	3724.6	67.3889
											3512.8	65.187	3727.2	67.4251
											3516.8	65.222	3727.3	67.4612
											3520.6	65.2569	3743.1	67.4973
											3523.8	65.2919	3743.9	67.5334
											3532.7	65.3268	3757.5	67.5695
											3536.6	65.3618	3760.1	67.6056
											3539.8	65.3967	3767.8	67.6417
											3545.8	65.4317	3773.9	67.6779
											3551.1	65.4666	3774.8	67.714
											3560.5	65.5016	3781.4	67.7501
											3560.7	65.5365	3790	67.7862
											3567	65.5715	3790.4	67.8223
											3587	65.6064	3790.6	67.8584
											3588.9	65.6414	3791.1	67.8945
											3593.2	65.6763	3794.1	67.9307
											3601.6	65.7113	3803.9	67.9668
											3604.4	65.7462	3817.1	68.0029
											3604.6	65.7812	3825.8	68.039
											3611.6	65.8161	3827	68.0751
											3614.5	65.8511	3828.9	68.1112
											3615.8	65.8861	3840.2	68.1473
											3615.9	65.921	3855.9	68.1835
											3620.8	65.956	3859.6	68.2196
											3625.6	65.9909	3860.4	68.2557
											3628	66.0259	3865	68.2918
											3628.6	66.0608	3870.7	68.3279
											3644.3	66.0958	3871.2	68.364
											3644.4	66.1307	3885.8	68.4001
											3645.1	66.1657	3888.6	68.4363
											3655.6	66.2006	3890.8	68.4724
											3659.2	66.2705	3903.2	68.5085
											3659.6	66.3055	3920.3	68.5446
											3662	66.3404	3930.2	68.5807
											3662.7	66.3754	3931.1	68.6168
											3663.5	66.4103	3932	68.6529
											3674.2	66.4453	3940.7	68.6891
											3675.4	66.4803	3941.7	68.7252
											3682.7	66.5152	3944.1	68.7613
											3683.2	66.5502	3959.1	68.7974
											3688.4	66.5851	3978	68.8335
											3690	66.6201	3978.6	68.8696
											3695.8	66.655	3981	68.9057
											3695.9	66.69	3987.3	68.9419
											3696.5	66.7249	3988.8	68.978
											3697.7	66.7599	3990	69.0141
											3698.4	66.7948	3991.9	69.0502
											3701.4	66.8298	3999.3	69.0863
											3703.6	66.8647	4004.1	69.1585
											3720.9	66.8997	4007.4	69.1947
											3725.2	66.9346	4015.4	69.2308
											3730.6	66.9696	4017.8	69.2669
											3736.9	67.0045	4018.4	69.303
											3742.7	67.0395	4024.2	69.3391
											3744.8	67.0744	4033.5	69.3752
											3745.4	67.1094	4034.6	69.4113
											3746.7	67.1444	4043.8	69.4475
											3748.5	67.1793	4056.4	69.4836
											3749.2	67.2143	4060.2	69.5197
											3752.1	67.2492	4061.5	69.5558
											3754.2	67.2842	4064.8	69.5919
											3756.5	67.3191	4071.2	69.628
											3766.5	67.3541	4080.9	69.6641
											3778.8	67.389	4081.6	69.7003
											3779.5	67.424	4083.8	69.7364
											3780.8	67.4589	4086.9	69.7725
											3787.2	67.4939	4092.6	69.8086
											3791.5	67.5288	4095	69.8447
											3795.5	67.5638	4102.9	69.8808
											3808	67.5987	4103.1	69.9169
											3812.7	67.6337	4115.8	69.9531
											3815.6	67.6686	4121.4	69.9892
											3820.4	67.7036	4122.7	70.0253
											3826.5	67.7386	4125.9	70.0614
											3840	67.7735	4145	70.0975
											3842.5	67.8085	4145.8	70.1336
											3846	67.8434	4146	70.1697
											3853.3	67.8784	4149.3	70.2059
											3854.5	67.9133	4156.7	70.242
											3854.6	67.9483	4171.1	70.2781
											3855.5	67.9832	4178.6	70.3142
											3857	68.0182	4190	70.3503
											3864.3	68.0531	4202.4	70.3864
											3867.9	68.0881	4213	70.4225
											3888	68.123	4217.2	70.4586
											3888.1	68.158	4217.5	70.4948
											3896	68.1929	4218.5	70.5309
											3896.7	68.2279	4223.6	70.567
											3900	68.2628	4234.5	70.6031
											3901.1	68.2978	4234.6	70.6392
											3905.2	68.3328	4237.7	70.6753
											3913.7	68.3677	4247	70.7114
											3918.8	68.4027	4247.6	70.7476
											3921.4	68.4376	4253.6	70.7837
											3921.8	68.4726	4256.5	70.8198
											3922.2	68.5075	4263	70.8559
											3923	68.5425	4265.5	70.892
											3929.8	68.5774	4271.6	70.9281
											3932.4	68.6124	4278.8	70.9642
											3938.1	68.6473	4282.9	71.0004
											3938.9	68.6823	4290.2	71.0365
											3944.6	68.7172	4302.2	71.0726
											3947.9	68.7522	4305.3	71.1087
											3948.2	68.7871	4314.5	71.1448
											3954.6	68.8221	4325.1	71.1809
											3957.6	68.857	4330.9	71.217
											3969.6	68.892	4336.1	71.2532
											3984.5	68.9269	4341.6	71.2893
											3996.2	68.9619	4348.8	71.3254
											3997.9	68.9969	4359.6	71.3615
											3999.4	69.0318	4367.1	71.3976
											4007.1	69.0668	4377.2	71.4337
											4020.7	69.1017	4381	71.4698
											4022.8	69.1367	4381.6	71.506
											4025.3	69.1716	4399.2	71.5421
											4027.4	69.2066	4401.9	71.5782
											4031.7	69.2415	4402.4	71.6143
											4050.9	69.2765	4407.8	71.6504
											4052.5	69.3114	4435.3	71.6865
											4053.5	69.3464	4441	71.7226
											4064	69.3813	4446.9	71.7588
											4069.1	69.4163	4451.3	71.7949
											4070	69.4862	4453.7	71.831
											4072.8	69.5211	4458.4	71.8671
											4080.1	69.5561	4458.9	71.9032
											4094	69.5911	4467.6	71.9393
											4098.4	69.626	4478.6	71.9754
											4104.4	69.661	4495.6	72.0116
											4108.8	69.6959	4497.3	72.0477
											4109.2	69.7309	4500.4	72.0838
											4114.3	69.7658	4506.1	72.1199
											4126.8	69.8008	4520.7	72.156
											4127.4	69.8357	4524.6	72.1921
											4129.3	69.8707	4534.5	72.2282
											4134.4	69.9056	4539.2	72.2644
											4134.7	69.9406	4542.1	72.3005
											4136.8	69.9755	4544.8	72.3366
											4140	70.0105	4545.5	72.3727
											4144.8	70.0454	4554.3	72.4449
											4145.9	70.0804	4561	72.481
											4153.5	70.1153	4562.3	72.5172
											4154.9	70.1503	4567.6	72.5533
											4171.3	70.1852	4569	72.5894
											4176	70.2202	4572.1	72.6255
											4189.1	70.2552	4580.6	72.6616
											4194.7	70.2901	4583	72.6977
											4199.8	70.3251	4617.1	72.7338
											4205.8	70.36	4620.9	72.77
											4207.2	70.395	4622.6	72.8061
											4217.2	70.4299	4627.6	72.8422
											4217.4	70.4649	4636.6	72.8783
											4218.2	70.4998	4643.5	72.9144
											4223.5	70.5348	4656.6	72.9505
											4225.5	70.5697	4664.5	72.9866
											4227.6	70.6047	4674.1	73.0228
											4229.6	70.6396	4682.3	73.0589
											4232.1	70.6746	4688	73.095
											4234.9	70.7095	4692.5	73.1311
											4237.6	70.7445	4694.3	73.1672
											4238.7	70.7794	4697.1	73.2033
											4241.3	70.8144	4699.2	73.2394
											4256.8	70.8494	4704.1	73.2756
											4264.4	70.8843	4704.8	73.3117
											4266.8	70.9193	4713.9	73.3478
											4270	70.9542	4716.2	73.3839
											4272.1	70.9892	4743.9	73.42
											4273.1	71.0241	4749.3	73.4561
											4274.3	71.0591	4752.7	73.4922
											4286	71.094	4753.9	73.5283
											4287.9	71.129	4758.8	73.5645
											4290.6	71.1639	4761.2	73.6006
											4294.7	71.1989	4767.3	73.6367
											4294.8	71.2338	4792.2	73.6728
											4294.9	71.2688	4794.2	73.7089
											4300.5	71.3037	4801.3	73.745
											4307.7	71.3387	4806.1	73.7811
											4313.1	71.3736	4809.7	73.8173
											4324.5	71.4086	4812.6	73.8534
											4324.6	71.4436	4815.2	73.8895
											4341.8	71.4785	4819.8	73.9256
											4346.6	71.5135	4832.3	73.9617
											4349.5	71.5484	4836.8	73.9978
											4350.2	71.5834	4842.3	74.0339
											4375	71.6183	4861.9	74.0701
											4396.5	71.6533	4874.1	74.1062
											4400.1	71.6882	4875.3	74.1423
											4418	71.7232	4880.8	74.1784
											4443.7	71.7581	4891.3	74.2145
											4453.1	71.7931	4904.8	74.2506
											4457.3	71.828	4911.4	74.2867
											4462.3	71.863	4921.5	74.3229
											4468.8	71.8979	4921.8	74.359
											4469.2	71.9329	4924.8	74.3951
											4469.8	71.9678	4926.8	74.4312
											4475.7	72.0028	4938.6	74.4673
[truncated: 799 more rows]
[truncated: 52 more columns]
