# Supplementary material for: KIF2C regulates synaptic plasticity and cognition in mice through dynamic microtubule depolymerization
Source: eLife. 2022 Feb 9;11:e72483. doi: 10.7554/eLife.72483 (PMC8828051; doi:10.7554/eLife.72483)
Supplement: Figure 6—source data 1. — Values for MT invasion frequency; Values for number of spines containing MTs before and after BDNF treatment; Values for mEPSCs of cKO+ control, cKO+ KIF2 C(WT), and cKO+ KIF2 C(G491A); Values for percentage changes of fEPSCs amplitudes of cKO+ control, cKO+ KIF2 C(WT), and cKO+ KIF2 C(G491A). [file elife-72483-fig6-data1.xlsx]

## Sheet: Sheet1
Figure 6–source data
	Figure6B										Figure6C				Figure6D						Figure6E						Figure6F								Figure6F						Figure6F								Figure6F
	speed (μm/min)		growth speed (μm/min)		growth lifetime (s)		growth length (μm)								%						%						mEPSC amplitude cumulative probability curves								mEPSC Amplitude pA						mEPSC frequency cumulative probability curves								mEPSC Frequency Hz
	WT	cKO	WT	cKO	WT	cKO	WT	cKO			WT	cKO			WT	WT+BDNF	cKO	cKO+BDNF			cKO+GFP	cKO+GFP+BDNF	cKO+GFP-KIF2C	cKO+GFP-KIF2C+BDNF			cKO+control		cKO+G491A		cKO+KIF2C(WT)				cKO+control	cKO+G491A	cKO+KIF2C(WT)				cKO+control		cKO+G491A		cKO+KIF2C(WT)				cKO+control
	14.4091	15.3334	15.511	24.1731	13.4727	6.86928	3.28412	2.12286			0.48	0.4615			3.7736	6.5934	8.9552	1.7857			2	2.72727	4.34783	5.7971			3.052	0.0480538	3.052	0.0537634	4.883	0.156495			19.5209	17.9729	17.6912				9.7	0.0484731	16.7	0.0541419	7.5	0.0394477			1.43039
	12.9572	12.6067	13.8428	38.5891	11.449	6.57	2.52654	3.33646			0.3396	0.7059			2.5641	8.2192	2.8571	1.3889			5.55556	3.57143	1.75439	3.22581			3.662	0.0961076	5.493	0.107527	5.493	0.312989			18.8093	21.0904	15.8692				14.8	0.0969462	22.8	0.108284	10	0.0788955			1.82509
	8.72084	12.7628	15.0165	33.6687	10.5336	6.34257	2.27095	2.89319			0.5294	1.375			3.2787	7.5472	3.5714	3.125			3.84615	2.27273	1.96078	1.49254			4.883	0.144161	6.714	0.483871	6.104	0.86072			16.0685	19.96	16.889				15.8	0.145419	22.9	0.162426	18.7	0.118343			2.85179
	6.81629	11.6597	13.0161	21.7605	13.3192	7.48897	2.96797	2.2391			0.5581	0.5085			5.8824	9.6154	4.8387	5			4.44444	1.1236	2.5641	1.08696			6.1	0.192215	7.324	1.45161	6.714	1.95618			17.6382	17.3641	17.0898				17.4	0.193892	23.9	0.216567	21.9	0.157791			2.36056
	7.15028	12.1067	14.7812	32.4748	12.25	7.35	2.71071	3.5327			0.3077	0.5333			1.4706	7.0423	8.0645	1.2987			2.63158	3.92157	3.44828	3.57143			6.104	0.336377	7.935	3.06452	7.324	4.65571			18.0604	18.5625	16.5342				18.1	0.242365	25.4	0.270709	22.1	0.197239			2.21451
	7.89025	10.6781	13.4625	29.6217	14.4629	5.73595	2.85954	2.20635			0.297	0.1333			1.6667	3.4483	3.9216	1.7241			4	2.77778	1.96078	3.63636			6.714	0.720807	8.545	5.48387	7.935	8.76369			23.8419	18.4776	18.6399				19	0.290839	28.9	0.324851	22.3	0.236686			0.947998
	8.51827	15.1239	19.2084	23.7678	10.8273	5.97784	3.18164	2.06359			0.3448	1.3158			7.3529	1.6667	4.7059	3.0303			5.1948	1.69491	2.85714	3			7.324	1.20135	9.155	8.60215	8.545	13.9671			20.4592	19.8774	15.7471				19.5	0.339312	29.1	0.378993	23.6	0.276134			1.21388
	6.10529	11.5961	16.5014	35.2066	12.4195	6.45978	2.87356	3.67582			0.2195	1.3846			4.3478	2.381	6.1538	4.4118			3.44828	4.22535	1.69491	1.0101			7.935	2.83518	9.766	11.5591	9.155	19.9139			17.3275	19.8582	16.928				20.8	0.387785	30.4	0.433135	24.2	0.315582			2.66884
	8.04508	10.0453	18.1767	27.0226	11.0164	6.489	3.29566	2.28586			0.125	0.4615			4.2553	1.0638	2.8571	5.8824			1.66667	2.5	3.0303	4.34783			8.545	5.28592	10.376	15.6452	9.766	25.8216			17.6956	19.2402	17.6591				24.5	0.436258	33.6	0.487277	24.7	0.35503			1.34701
	8.42605	15.5294	19.2837	24.9753	11.8525	6.54231	3.36664	2.51106			0.4045	1.7778			6.3492	1.4493	1.5873	4.2254			4.54545	3.84615	1.7094	3.88349			8.55	5.33397	10.986	20.7527	10.376	31.025			21.047	15.8533	18.9006				25.2	0.484731	33.9	0.541419	25.4	0.394477			0.919043
	8.9647	15.7658	14.678	26.4324	13.1339	5.12195	2.92172	2.15115			0.2069	0.2727			2.439	5.6604	6.8493	4.6875			2.7027	3.57143	3.1746	6.09756			9.155	8.40942	11.597	25.0538	10.986	36.6588			18.3895	16.8081	15.2499				25.7	0.533204	39.9	0.59556	27.3	0.433925			1.95
		13.4071	16.4433	22.3187	12.6447	6.75566	3.22494	2.12178			0.9231	0.9398			1.7544	5	3.75	4.6875			1.42857	3.7037	0.900901	5.10204			9.16	8.45747	12.207	28.871	11.597	40.6495			17.3797	22.4777	19.5658				26.5	0.581677	40.1	0.649702	28.3	0.473373			1.92142
		13.5229	16.2497	28.8085	10.7686	6.65	2.80441	2.80139			0.5217	1.5996			2.1739	5.4795	1.4925	4.7619			1.17647	2.10526	2.98508	4.70588			9.766	12.2057	12.817	33.3333	12.207	46.3615			21.5901	23.2587	17.0141				26.8	0.63015	40.6	0.703844	29.7	0.512821			1.08042
		10.5972	20.2956	40.2016	11.5419	6.45533	3.83538	3.35191			1.0909	1.2903			3.125	3.1746	1.5385	4.6154			3.6036	3.61446	2.08333	3.1746			9.77	12.3018	13.428	38.2258	12.817	49.9609			16.9731	14.482	12.2392				34.3	0.678623	42	0.757986	33.4	0.552268			1.47018
		14.6858	14.7621	27.0642	11.4563	6.67917	2.72369	2.64708			0.3396	1.994			1.6949	6.3492	4	1.1905			1.20482	3.125	1.75439	8			10.376	16.7708	14.038	42.3118	13.428	54.1862			16.7028	28.63	12.0676				35.7	0.727096	42.7	0.812128	34.1	0.591716			2.4017
		12.1131	17.2825	25.8993	12.0919	6.99462	3.38909	2.63497				1.2			1.3333	7.1429	6.0606	1.7241			4.49438	3.0303	2.77778	2.85714			10.38	16.9149	14.648	45.5376	14.038	57.9812			16.07		14.41				37.6	0.77557	44.5	0.86627	34.6	0.631164			2.97
		13.6462	19.7404	36.1646	14.0206	6.69963	4.40798	3.79042				2.1579			1.9231	8.8889	5.3333	2.8571			2.7027	0.943396	2.06186	5.97015			10.986	21.432	15.259	48.871	14.648	60.759			16.49		14.4704				40.3	0.824043	45	0.920411	37.5	0.670611			1.09
		15.7944	16.3534	34.0415	11.9233	6.111	2.91812	2.90424							2.6667	4.6154	4.2254	3.125			3.26087	2.27273	3	5.88235			11.597	26.5738	15.869	51.3978	15.259	64.4757			15.17		12.2486				43.9	0.872516	45.9	0.974553	38.5	0.710059			1.18
		8.76463	19.9355	23.7807	11.6382	8.75	3.67771	3.79288							5.7971	9.0909	1.5625	3.1746			4.7619	3.125	3.22581	5.55556			11.6	26.7179	16.479	54.8925	15.869	67.1362					14.6575				45.7	0.920989	46	1.0287	38.8	0.749507
		11.1173	20.5435	25.0681	11.7263	6.92143	3.92218	2.57084							1.25	2.5641	7.1429	1.5385			4.21053	2.04082	3.38983	6.93069			12.207	31.4272	16.528	54.9462	16.479	69.1706					13.0567				46.5	0.969462	46.7	1.08284	39	0.788955
		9.27016	17.9989	35.0094	12.84	5.93394	3.49058	2.97214							4.4118	4	2.8986	1.5625			3.7037	4.62963	3.61446	4.38596			12.21	31.4753	17.09	57.4731	17.09	71.6354					16.0648				48.2	1.01794	47.3	1.13698	39.1	0.828402
		10.578	22.8519	28.1001	13.275	5.2748	4.26317	2.35725							1.5625	5.7971	2.3529	4.5455			7.8125	1.88679	1.36986	4.49438			12.817	35.3196	17.7	59.9462	17.7	73.5915									48.4	1.06641	47.8	1.19112	41.2	0.86785
		9.27199	18.01	27.3524	11.907	11.1563	3.29268	3.12093							2	10	4.2857	2.9412			2.8169	1.81818	1.63934	4.7619			12.82	35.4637	18.311	62.2581	18.311	75.0782									49	1.11488	48.4	1.24526	41.5	0.907298
			17.451	28.5	11.6562	7.33158	3.48226	3.17407							2.5974	7.4074	7.8	4.3478			6.15385	2.73973	0.487805	6.14035			13.428	40.173	18.921	64.8925	18.921	76.6041									50.3	1.16335	50.9	1.2994	41.9	0.986193
			15.2894	30.6008	12.1466	6.47673	3.20954	2.65288							1.7241	5.1948		3.5714			2.98508	2.04082	3	6.38298			13.43	40.3652	19.531	66.6667	19.531	78.0125									51.7	1.21183	51.7	1.35355	43.2	1.02564
			17.7569	17.8678	13.2449	6.74211	3.9356	1.7994							1.5625	9.6774		2.8986			3.7037	4.05405		3.78788			14.038	44.2576	20.142	68.4409	20.142	79.108									53.6	1.2603	52.4	1.40769	45	1.06509
			13.2253	25.3711	12.3951	7.60345	2.47928	2.48457							2	4.2857		1.6393			2.17391	5		3.125			14.648	48.4383	20.752	70.2151	20.752	80.4382									53.8	1.30877	53.7	1.46183	46.1	1.10454
			13.8642	24.9539	14.0509	7.73451	2.77895	2.75366							2.7027	12.069		6.5574						1.53846			14.65	48.5344	21.362	72.0968	21.362	81.3772									54.1	1.35725	54.2	1.51597	47.3	1.14398
			16.5632	21.5915	10.7673	7.56977	2.54388	1.97163							1.4286	5.9701								1.48148			15.259	51.6098	21.973	73.5484	21.973	82.9421									55.9	1.40572	57.7	1.57011	49.1	1.18343
			13.6304	25.0623	10.4528	6.31313	2.1431	2.11739								6.3492								2.88462			15.26	51.8981	22.583	74.7849	22.583	83.8419									57.3	1.45419	57.9	1.62426	50	1.22288
			34.2529	32.7502	6.08571	6.48579	2.61447	3.37528								5.7143								2.08333			15.869	55.1658	23.193	75.9677	23.193	84.82									59.9	1.50267	58.1	1.6784	51.9	1.26233
			36.5876	29.5193	7.08158	6.76271	4.06344	3.16234																7.84314			15.87	55.2619	23.804	77.2043	23.804	86.072									60.4	1.55114	60.2	1.73254	53.1	1.30178
			30.1386	34.1757	6.7375	6.7379	2.43181	3.66963																4.91803			16.479	58.2412	24.414	78.2258	24.414	86.7371									60.5	1.59961	60.4	1.78668	53.2	1.34122
			34.1322	19.5372	5.81438	8.25517	3.13216	2.60117																			16.48	58.2893	25.024	79.6774	25.024	87.5196									64.9	1.64809	60.8	1.84082	54.1	1.38067
			37.3977	23.9864	5.61699	7.90588	3.17562	3.16243																			17.09	61.0764	25.635	80.5914	25.635	88.1455									65.9	1.69656	61.2	1.89496	56	1.42012
			23.1756	23.8944	7.185	6.75341	1.95547	2.2936																			17.7	63.0947	26.245	81.8817	26.245	88.928									66.5	1.74503	62.8	1.94911	56.4	1.45957
			31.999	31.4996	6.90758	8.17371	3.06064	3.86901																			18.31	63.1908	26.855	82.957	26.855	89.6322									68.4	1.7935	64.5	2.00325	57	1.49901
			29.5663	31.8706	5.44052	6.55319	2.551	3.26224																			18.311	65.9298	27.466	83.8172	27.466	90.5321									70.2	1.84198	65	2.05739	57.8	1.53846
			31.9132	34.5355	7.76712	6.06558	3.38259	3.08011																			18.92	65.9779	28.076	84.1935	28.076	91.0016									70.9	1.89045	66.1	2.11153	57.9	1.57791
			30.9244	41.2283	7.07665	6.64186	3.06774	3.93667																			18.921	68.3806	28.687	85.0538	28.687	91.3146									77.3	1.93892	67.8	2.16567	58.2	1.61736
			37.2537	37.6287	7.00211	6.36081	4.07991	3.57436																			19.53	68.4286	29.297	85.8065	29.297	91.9405									78.8	1.9874	68.4	2.21982	58.6	1.6568
			33.5373	25.9945	6.1957	8.49488	3.0805	2.80202																			19.531	69.9664	29.907	86.6129	29.907	92.5274									81.9	2.03587	68.7	2.3281	59.5	1.69625
			31.1488	23.6099	7.37258	7.54485	3.40997	2.73983																			20.14	70.1105	30.518	87.3656	30.518	93.0751									82	2.08434	69	2.38224	60.3	1.7357
			29.5356	27.9674	6.03096	5.88437	2.88672	2.3576																			20.142	72.1288	31.128	88.2258	31.128	93.5446									82.6	2.13282	69.7	2.43638	61.2	1.77515
			30.493	31.5564	6.45709	6.31189	2.56365	2.90764																			20.75	72.1768	31.738	88.8172	31.738	93.7011									83.4	2.18129	70	2.49053	62.2	1.8146
			30.5849	31.7166	5.68099	6.98978	2.71185	2.85701																			20.752	74.0509	32.349	89.4086	32.349	93.8967									85.7	2.22976	70.3	2.54467	62.5	1.85404
			22.5747	29.9259	6.96652	6.81521	2.26218	2.76164																			21.36	74.147	32.959	89.8387	32.959	94.3271									85.9	2.27824	71.4	2.59881	62.9	1.89349
			29.6471	32.383	5.85968	7.38902	2.69559	3.25625																			21.362	75.7809	33.569	90.4839	33.569	94.6401									87.3	2.32671	72.8	2.65295	63.2	1.93294
			27.0206	33.6019	6.50819	6.8	2.40282	3.28664																			21.97	75.8289	34.18	91.2366	34.18	94.9922									87.7	2.37518	74.3	2.70709	64.7	2.01183
			29.6229	33.5509	5.87344	6.26205	2.66955	3.07892																			21.973	77.3667	34.79	91.6667	34.79	95.2269									88.2	2.42365	75.3	2.76123	64.8	2.05128
			32.6144	33.0819	7.23436	6.76587	3.37814	3.21657																			22.58	77.4147	35.4	92.2581	35.4	95.4617									92.1	2.47213	75.7	2.81538	65	2.09073
			30.3075	18.3255	6.8486	8.68226	3.13203	2.18299																			22.583	78.616	36.011	92.7957	36.011	95.8138									93.8	2.5206	75.9	2.92366	65.3	2.13018
			31.8344	24.5565	6.28816	7.07538	2.9772	2.29936																			23.19	78.7122	36.621	93.1183	36.621	96.1659									95.4	2.56907	77.8	2.9778	65.6	2.16963
			31.3939	30.0914	6.81711	6.11533	3.19295	2.60722																			23.193	80.2499	37.231	93.3871	37.231	96.3615									95.6	2.61755	77.9	3.03194	66.2	2.20907
			33.1816	52.0163	6.38147	5.50083	3.21158	4.55374																			23.8	80.2979	37.842	93.6022	37.842	96.5962									100.4	2.66602	78.6	3.08609	66.4	2.24852
			37.6222	45.2852	6.14958	6.32154	3.36226	4.52418																			23.804	81.259	38.452	93.871	38.452	97.0266									101.4	2.71449	79.1	3.14023	66.8	2.28797
			35.2039	31.8297	6.06619	7.3627	3.38131	3.37751																			24.41	81.3551	39.063	94.086	39.063	97.2222									103.6	2.81144	80.3	3.19437	68.2	2.32742
			34.4756	35.8149	7.34697	7.05769	3.51619	3.61656																			24.414	82.3642	39.673	94.1935	39.673	97.3787									103.7	2.85991	80.5	3.24851	69.4	2.36686
				38.2136		6.32577		4.15049																			25.02	82.4604	40.283	94.4086	40.283	97.5743									105.5	2.90839	81	3.30265	69.7	2.40631
				51.7706		5.16569		4.29333																			25.024	83.5175	40.894	94.6237	40.894	97.77									106.8	2.95686	81.7	3.35679	70.7	2.44576
				49.4297		5.41827		4.39512																			25.635	84.6708	41.504	94.8925	41.504	97.9656									107.3	3.00533	83.3	3.41094	71.6	2.48521
				41.3475		3.84226		2.49853																			26.245	85.7761	42.114	95.2688	42.114	98.1612									108.2	3.05381	84.3	3.46508	72.6	2.52465
				42.9269		3.4588		2.26203																			26.855	86.3047	42.725	95.4301	42.725	98.3568									109	3.10228	86.1	3.57336	74.3	2.5641
																											27.466	87.1696	43.335	95.5376	43.335	98.4351									110.6	3.15075	86.6	3.6275	75.7	2.60355
																											27.47	87.2657	43.945	95.8602	43.945	98.6307									112.4	3.19922	87.6	3.68165	76	2.643
																											28.076	87.9865	44.556	96.129	44.556	98.8263									112.5	3.2477	87.9	3.73579	76.6	2.68245
																											28.687	88.371	45.166	96.2903	45.166	98.9437									115.7	3.29617	88.4	3.78993	77	2.72189
																											29.297	88.9957	45.776	96.3978	45.776	98.9828									115.8	3.34464	88.5	3.89821	77.1	2.80079
																											29.3	89.0437	46.387	96.5591	46.997	99.0219									118.1	3.39312	88.7	3.95236	77.2	2.84024
																											29.907	89.7165	46.997	96.8817	47.607	99.061									118.8	3.44159	89	4.06064	78	2.87968
																											30.518	90.0048	47.607	97.0968	48.218	99.1002									119.3	3.49006	90.1	4.11478	78.2	2.91913
																											31.128	90.4853	48.218	97.3118	48.828	99.1393									120.6	3.53854	90.9	4.16892	78.4	2.95858
																											31.13	90.5334	48.828	97.3656	50.049	99.1784									121.1	3.58701	91.6	4.22306	79.3	2.99803
																											31.738	91.1581	49.438	97.5269	50.659	99.2175									121.6	3.68396	91.8	4.27721	79.6	3.03748
																											32.349	91.5425	50.049	97.7419	51.27	99.2567									122.1	3.7809	92	4.33135	80.3	3.07692
																											32.35	91.5906	50.659	97.8495	53.101	99.3349									122.3	3.82937	92.7	4.38549	80.4	3.11637
																											32.959	92.3114	51.27	97.9032	54.321	99.4914									122.4	3.92632	96.7	4.43963	80.9	3.15582
																											33.569	92.9361	52.49	98.172	54.932	99.5696									123.5	3.97479	97.5	4.49377	81.1	3.19527
																											34.18	93.3686	53.101	98.3333	56.152	99.6088									124	4.02327	97.7	4.54792	81.2	3.23471
																											34.79	93.5608	53.711	98.4409	56.763	99.6479									124.1	4.07174	98	4.60206	83.4	3.27416
																											35.4	93.8491	54.321	98.4946	58.594	99.687									124.2	4.12021	98.7	4.71034	83.8	3.31361
																											36.011	94.0894	54.932	98.7097	61.035	99.7261									125.2	4.16869	99.4	4.76448	84.4	3.35306
																											36.621	94.2816	55.542	98.7634	62.256	99.7653									125.5	4.21716	99.7	4.81862	84.8	3.3925
																											37.231	94.618	56.152	98.8172	64.697	99.8044									126.7	4.26563	100.4	4.87277	85.2	3.43195
																											37.324	94.666	56.763	98.871	75.073	99.8435									127.3	4.31411	100.6	4.92691	86.1	3.4714
																											37.842	94.9543	57.373	98.9247	76.904	99.8826									128.1	4.36258	101.9	4.98105	86.8	3.51085
																											37.935	95.0024	57.983	99.0323	84.229	99.9218									129.5	4.41105	102.2	5.03519	86.9	3.5503
																											38.452	95.2427	58.594	99.086	119.629	99.9609									130	4.45952	103.2	5.08933	87	3.58974
																											39.063	95.579	59.204	99.1935	122.07	100									130.1	4.508	106.4	5.14348	87.2	3.62919
																											39.673	95.8193	59.814	99.3548											131.5	4.55647	106.8	5.19762	88.6	3.66864
																											40.283	95.9635	61.035	99.4086											132.4	4.60494	107.1	5.25176	88.8	3.70809
																											40.89	96.0115	62.256	99.4624											135.2	4.70189	108.1	5.3059	89.1	3.74753
																											40.894	96.2999	63.477	99.5161											135.5	4.75036	108.7	5.36004	89.3	3.78698
																											41.504	96.5401	64.087	99.5699											135.8	4.79884	109.8	5.41419	89.4	3.82643
																											42.114	96.7323	65.918	99.6237											136.3	4.84731	111.4	5.46833	90.1	3.86588
																											42.725	96.8765	67.139	99.6774											136.4	4.89578	112.7	5.52247	90.8	3.90533
																											43.335	97.1648	67.749	99.7312											136.8	4.99273	113	5.57661	91.2	3.94477
																											43.945	97.357	72.632	99.7849											139.1	5.0412	113.2	5.63075	91.8	3.98422
																											44.556	97.5012	76.294	99.8387											139.3	5.08968	113.8	5.68489	93.2	4.02367
																											45.166	97.5493	76.904	99.8925											140.8	5.13815	114	5.79318	94.3	4.06312
																											45.776	97.5973	77.515	99.9462											140.9	5.18662	115.1	5.84732	94.6	4.10256
																											46.387	97.8856	78.735	100											141.3	5.23509	115.2	5.90146	96.9	4.14201
																											46.997	97.9817													144	5.28357	115.4	5.9556	98.3	4.18146
																											47	98.0298													145.2	5.33204	116	6.00975	98.9	4.22091
																											47.607	98.1259													146	5.38051	118	6.06389	99.2	4.2998
																											48.218	98.4142													148.2	5.42899	120.4	6.11803	100.9	4.33925
																											49.438	98.4623													148.4	5.47746	122.9	6.17217	102.8	4.3787
																											50.049	98.5103													149.1	5.52593	123.2	6.22631	102.9	4.41815
																											50.659	98.6545													150.6	5.57441	123.6	6.28045	103.7	4.45759
																											51.27	98.7506													151.5	5.62288	123.8	6.3346	104.2	4.49704
																											51.88	98.8467													152.4	5.67135	123.9	6.38874	105.7	4.53649
																											52.49	98.9428													153.9	5.71983	124.6	6.44288	106.7	4.57594
																											53.101	98.9909													157.9	5.7683	124.7	6.49702	106.8	4.61538
																											53.711	99.087													160.8	5.81677	125.1	6.55116	107	4.65483
																											54.321	99.135													161.4	5.86524	126.3	6.60531	107.1	4.69428
																											54.932	99.1831													162.8	5.91372	127.2	6.65945	108.1	4.73373
																											56.15	99.2311													164.4	5.96219	127.3	6.71359	111.1	4.81262
																											56.152	99.2792													164.6	6.01066	127.9	6.76773	111.2	4.85207
																											56.76	99.3272													164.7	6.05914	129.9	6.87602	111.3	4.89152
																											56.763	99.4234													165.7	6.15608	130.2	6.93016	111.4	4.93097
																											58.594	99.5195													167.2	6.20456	130.5	6.9843	111.6	4.97041
																											61.646	99.5675													167.9	6.25303	131	7.03844	111.8	5.04931
																											62.256	99.7117													173.3	6.3015	131.5	7.09258	111.9	5.08876
																											64.087	99.7597													173.5	6.34998	131.7	7.14672	113.1	5.12821
																											64.697	99.8078													174.2	6.39845	132.1	7.20087	113.6	5.16765
																											66.528	99.8558													174.5	6.44692	132.3	7.25501	114.8	5.2071
																											67.749	99.9519													175.8	6.54387	132.5	7.30915	116.9	5.286
																											70.19	100													176.1	6.59234	134.3	7.36329	117.3	5.32544
																																									176.9	6.64081	135.9	7.41743	118.1	5.36489
																																									177.5	6.68929	137.4	7.47158	119.1	5.40434
																																									178.3	6.73776	138.3	7.52572	120.6	5.44379
																																									181	6.78623	138.5	7.57986	123.3	5.48323
																																									181.3	6.83471	139.1	7.634	123.4	5.52268
																																									181.6	6.93165	140	7.68814	126.6	5.56213
																																									181.8	6.98013	140.2	7.74228	128.1	5.60158
																																									183	7.0286	141.7	7.79643	128.6	5.64103
																																									183.1	7.07707	143.8	7.85057	131.1	5.68047
																																									183.6	7.12555	144.3	7.90471	132.1	5.71992
																																									184.1	7.17402	144.4	7.95885	132.7	5.75937
																																									186.1	7.22249	144.8	8.01299	132.9	5.79882
																																									186.5	7.27096	146.3	8.06714	133	5.83826
																																									186.7	7.31944	150.8	8.12128	133.5	5.87771
																																									187.5	7.36791	151.4	8.17542	137.6	5.91716
																																									188	7.41638	152.3	8.22956	138.3	5.95661
																																									189	7.46486	152.6	8.2837	138.5	5.99606
																																									192.1	7.51333	153.5	8.33785	138.6	6.0355
																																									194.4	7.5618	154.5	8.39199	139.6	6.07495
																																									195.1	7.61028	155.9	8.44613	140.5	6.1144
																																									198.1	7.65875	157.8	8.50027	140.9	6.19329
																																									199	7.70722	157.9	8.55441	141	6.23274
																																									199.9	7.80417	158.2	8.60855	142	6.27219
																																									200	7.85264	158.4	8.6627	142.7	6.31164
																																									201.1	7.90111	158.7	8.71684	144.3	6.35108
																																									203.2	7.94959	161	8.77098	145.3	6.39053
																																									204	7.99806	161.4	8.82512	145.4	6.42998
																																									206	8.09501	161.5	8.87926	145.6	6.50888
																																									206.4	8.14348	162.6	8.93341	145.7	6.54832
																																									207.4	8.19195	163.4	8.98755	145.9	6.58777
																																									208.4	8.24043	164.7	9.04169	146.4	6.62722
																																									208.5	8.2889	165.4	9.09583	146.9	6.66667
																																									211.5	8.33737	165.9	9.14997	147.6	6.70611
																																									211.6	8.38585	166	9.20411	148.4	6.74556
																																									214.5	8.43432	167.6	9.25826	148.9	6.78501
																																									215.4	8.48279	167.8	9.3124	150.6	6.82446
																																									217.1	8.53127	168.2	9.36654	151.2	6.86391
																																									217.9	8.57974	168.4	9.42068	153	6.90335
																																									219.5	8.62821	171.4	9.47482	154.4	6.9428
																																									221.6	8.67668	172.9	9.52897	157.4	6.98225
																																									222.4	8.72516	173.7	9.58311	158	7.0217
																																									222.6	8.77363	175.9	9.63725	159	7.06114
																																									223.7	8.8221	176.6	9.69139	159.5	7.10059
																																									226.3	8.87058	176.8	9.74553	161.2	7.14004
																																									228.3	8.91905	177.7	9.79968	161.3	7.17949
																																									229.2	8.96752	179.8	9.85382	162.6	7.21893
																																									231.7	9.016	180.8	9.90796	164.1	7.25838
																																									232.5	9.06447	181.3	9.9621	165.4	7.29783
																																									240	9.11294	181.7	10.0162	165.8	7.33728
																																									240.4	9.16142	181.8	10.0704	166.1	7.37673
																																									242.1	9.25836	183.2	10.1245	167.1	7.41617
																																									242.7	9.30683	184.6	10.1787	167.3	7.45562
																																									245.2	9.35531	184.9	10.2328	168.7	7.49507
																																									245.7	9.40378	185.6	10.287	169.6	7.53452
																																									247.6	9.45225	186.2	10.3411	170	7.57396
																																									249.2	9.50073	186.3	10.3952	170.6	7.61341
																																									250.3	9.5492	187	10.4494	171.7	7.69231
																																									250.4	9.59767	188.1	10.5577	172.6	7.73176
																																									253.8	9.64615	188.7	10.6118	172.8	7.7712
																																									255.4	9.69462	189.3	10.6659	175.6	7.81065
																																									255.9	9.74309	189.7	10.7201	176.4	7.8501
																																									256.5	9.79157	191.6	10.7742	176.8	7.92899
																																									256.8	9.84004	192.3	10.8284	177.3	7.96844
																																									258.6	9.88851	192.4	10.8825	178.1	8.00789
																																									259.6	9.93698	192.6	10.9367	180	8.04734
																																									259.9	9.98546	192.9	10.9908	180.6	8.08679
																																									260.9	10.0824	194.1	11.0449	181.2	8.12623
																																									261.3	10.1309	195.1	11.0991	183	8.16568
																																									261.5	10.1794	195.9	11.1532	183.9	8.24458
																																									261.6	10.2278	198.2	11.2074	184.8	8.28402
																																									265.4	10.2763	198.9	11.2615	184.9	8.32347
																																									267.1	10.3248	199.6	11.3156	185.1	8.36292
																																									267.7	10.3732	200.9	11.3698	185.3	8.40237
																																									271.6	10.4217	202.4	11.4239	185.4	8.44181
																																									273.3	10.4702	202.7	11.4781	186.1	8.48126
																																									273.6	10.5187	203.8	11.5322	186.4	8.56016
																																									275	10.5671	204.2	11.5864	190.6	8.59961
																																									275.9	10.6156	204.5	11.6405	192.6	8.63905
																																									276	10.6641	205.1	11.6946	193	8.6785
																																									277.4	10.761	206.2	11.7488	193.3	8.7574
																																									279.5	10.8095	206.9	11.8029	193.5	8.79684
																																									280.3	10.858	209.1	11.8571	196.7	8.83629
																																									281.8	10.9064	209.5	11.9112	197.5	8.87574
																																									284.7	10.9549	212.4	11.9653	197.9	8.91519
																																									284.8	11.0034	212.7	12.0195	198.5	8.95464
																																									286.3	11.0519	214.6	12.0736	199	8.99408
																																									287.7	11.1003	214.8	12.1278	199.7	9.03353
																																									290.4	11.1488	215.7	12.1819	200.7	9.07298
																																									290.9	11.1973	216.2	12.2361	201.5	9.11243
																																									293.7	11.2942	216.8	12.2902	201.6	9.15187
																																									296.5	11.3427	217.1	12.3443	202.1	9.19132
																																									296.6	11.3912	218.1	12.3985	205.2	9.23077
																																									298.6	11.4397	219.1	12.4526	205.3	9.27022
																																									298.9	11.4881	219.7	12.5068	205.8	9.30966
																																									300	11.5366	219.8	12.5609	206.6	9.34911
																																									302.7	11.5851	219.9	12.6151	207	9.38856
																																									305.9	11.6335	220.2	12.6692	207.8	9.42801
																																									306.2	11.682	221.4	12.7233	210	9.46746
																																									308	11.7305	222.6	12.7775	210.7	9.5069
																																									308.4	11.779	224.5	12.8316	212.6	9.54635
																																									309	11.8274	225.1	12.8858	212.7	9.5858
																																									309.1	11.8759	225.2	12.9399	213.6	9.62525
																																									309.3	11.9244	225.3	12.994	213.8	9.66469
																																									309.6	11.9729	225.9	13.0482	213.9	9.70414
																																									309.7	12.0213	226.3	13.1023	214.9	9.74359
																																									310.6	12.0698	226.9	13.1565	215.1	9.78304
																																									310.7	12.1183	227	13.2106	216.5	9.82249
																																									311.5	12.1667	227.6	13.2648	216.9	9.86193
																																									312.7	12.2152	229.1	13.3189	217.7	9.90138
																																									312.9	12.2637	229.4	13.373	219.7	9.94083
																																									314	12.3122	230.5	13.4272	221.2	10.0197
																																									315.1	12.3606	233.1	13.5355	221.6	10.0592
																																									317.4	12.4091	234.1	13.5896	222.2	10.0986
																																									319	12.4576	234.7	13.6437	222.3	10.1381
																																									319.5	12.5061	235.6	13.6979	223.5	10.1775
																																									320.7	12.5545	236.2	13.752	224.4	10.217
																																									320.8	12.603	237.9	13.8062	225.2	10.2564
																																									322.7	12.6515	238.5	13.9145	225.4	10.2959
																																									322.8	12.7	239	13.9686	226.4	10.3353
																																									325.5	12.7484	239.3	14.0227	227.1	10.3748
																																									325.6	12.7969	241.6	14.0769	227.4	10.4142
																																									326.4	12.8454	244.2	14.131	229.3	10.4536
																																									333.2	12.8938	246.4	14.1852	231	10.4931
																																									333.4	12.9423	246.7	14.2393	231.5	10.5325
																																									333.6	12.9908	247.7	14.2934	232.3	10.572
																																									337.3	13.0393	248.2	14.4017	233.5	10.6114
																																									338.2	13.0877	248.4	14.4559	234	10.6509
																																									338.5	13.1847	250	14.51	234.3	10.6903
																																									343.5	13.2332	250.8	14.5642	235.8	10.7298
																																									343.7	13.2816	251.3	14.6183	236.4	10.7692
																																									345.7	13.3301	251.6	14.6724	239.4	10.8087
																																									346.2	13.3786	252	14.7266	239.5	10.927
																																									346.9	13.427	252.9	14.7807	239.8	10.9665
																																									348.2	13.4755	253.5	14.8349	239.9	11.0059
																																									349.1	13.524	254.8	14.889	240.9	11.0454
																																									350.3	13.5725	255.3	14.9432	242.3	11.0848
																																									351.2	13.6209	256.1	14.9973	244	11.1243
																																									353.8	13.6694	256.4	15.0514	244.6	11.1637
																																									354.1	13.7179	256.9	15.1056	247.5	11.2032
																																									354.9	13.7664	257.6	15.1597	247.9	11.2426
																																									356.7	13.8148	258.7	15.2139	248.9	11.2821
																																									357.1	13.8633	260.8	15.268	249	11.3215
																																									358.7	13.9118	260.9	15.3221	249.9	11.3609
																																									359.5	13.9603	261.8	15.3763	253.1	11.4004
																																									361.8	14.0087	263.6	15.4304	254	11.4398
																																									362.1	14.0572	265	15.4846	254.1	11.4793
																																									365.4	14.1057	266.4	15.5387	254.7	11.5187
																																									366.1	14.1541	266.5	15.5929	255.1	11.5582
																																									366.2	14.2026	267.2	15.647	255.7	11.6371
																																									367.2	14.2511	267.5	15.7011	260.8	11.6765
																																									370.7	14.2996	267.7	15.7553	261.1	11.716
																																									371.1	14.348	268.3	15.8094	263.2	11.7554
																																									372.5	14.3965	270.2	15.8636	263.4	11.7949
																																									373.5	14.445	270.6	15.9177	267	11.8343
																																									373.6	14.4935	272.3	15.9718	268.7	11.8738
																																									374.6	14.5419	273.5	16.026	268.8	11.9132
																																									377	14.5904	273.7	16.0801	270.4	11.9527
																																									378.1	14.6389	274	16.1343	271.3	11.9921
																																									378.4	14.6873	274.3	16.1884	271.7	12.0316
																																									378.8	14.7358	274.8	16.2426	272.6	12.071
																																									385.6	14.7843	275.3	16.2967	272.8	12.1105
																																									386.1	14.8328	277.4	16.3508	273.6	12.1499
																																									387.1	14.8812	281	16.405	273.9	12.1893
																																									391.2	14.9297	282.2	16.4591	274.6	12.2288
																																									391.4	14.9782	282.3	16.5674	274.8	12.2682
																																									392.2	15.0267	282.6	16.6215	275.3	12.3077
																																									394.9	15.0751	283	16.6757	276.4	12.3471
																																									395.1	15.1236	285.1	16.7298	277.7	12.3866
																																									396.3	15.1721	285.4	16.784	277.8	12.426
																																									397.6	15.2206	286.1	16.8923	277.9	12.4655
																																									397.9	15.269	286.8	16.9464	278.7	12.5049
																																									401.2	15.3175	286.9	17.0005	281.4	12.5444
																																									401.8	15.366	287.7	17.0547	282.5	12.5838
																																									402.7	15.4144	288.7	17.1088	283.5	12.6233
																																									404.5	15.4629	288.8	17.163	284.7	12.6627
																																									405.1	15.5114	289.3	17.2171	285	12.7022
																																									406.1	15.5599	290.7	17.2713	288.4	12.7811
																																									407.7	15.6083	292.3	17.3254	288.6	12.8205
																																									408.3	15.6568	293.6	17.4337	289.8	12.86
																																									409.4	15.7053	297.9	17.4878	291.6	12.8994
																																									409.7	15.7538	299.8	17.542	292.9	12.9389
																																									410.1	15.8022	300	17.5961	293.4	12.9783
																																									410.3	15.8992	301.3	17.6502	293.8	13.0178
																																									410.7	15.9476	302	17.7044	295.5	13.0572
																																									411.3	15.9961	302.1	17.7585	297	13.0966
																																									411.6	16.0446	303	17.8127	298.1	13.1361
																																									414.5	16.0931	303.1	17.8668	299.4	13.215
																																									416.9	16.1415	304.3	17.921	301	13.2544
																																									418.7	16.19	304.5	17.9751	301.9	13.2939
																																									422.4	16.2385	305.1	18.0292	302.1	13.3333
																																									424.9	16.287	306.4	18.0834	303.7	13.3728
																																									426.5	16.3354	306.5	18.1375	305.5	13.4122
																																									427.6	16.3839	307.6	18.1917	306.7	13.4517
																																									429	16.4324	308	18.2458	308.1	13.4911
																																									429.2	16.4809	308.9	18.2999	308.5	13.5306
																																									431.6	16.5293	309.6	18.3541	311.5	13.57
																																									433.7	16.5778	313.6	18.4082	312.6	13.6095
																																									434.5	16.6263	314.1	18.5165	312.8	13.6489
																																									435.5	16.6747	314.5	18.5707	312.9	13.6884
																																									435.7	16.7232	315.5	18.6248	313	13.7278
																																									436.5	16.7717	316.4	18.6789	313.5	13.8067
																																									436.7	16.8686	316.8	18.7331	315.6	13.8856
																																									437.7	16.9171	317	18.8414	316	13.925
																																									438.6	16.9656	317.2	18.8955	316.6	13.9645
																																									439.3	17.0141	317.5	18.9496	317	14.0039
																																									444.2	17.0625	319.2	19.0038	317.9	14.0434
																																									446.1	17.111	319.3	19.0579	318.8	14.0828
																																									446.2	17.1595	319.8	19.1121	319	14.1223
																																									447.5	17.2079	321.5	19.1662	319.2	14.1617
																																									448.3	17.2564	324.5	19.2204	319.6	14.2012
																																									448.6	17.3049	325.4	19.2745	319.9	14.2406
																																									449.3	17.3534	327.6	19.3286	320.3	14.2801
																																									451.4	17.4018	330.2	19.3828	321.2	14.3195
																																									451.9	17.4503	333.1	19.4369	321.5	14.359
																																									454.4	17.4988	337.6	19.4911	322.9	14.3984
																																									455.5	17.5957	338.6	19.5452	323.4	14.4379
																																									458.7	17.6442	342.6	19.5994	324	14.4773
																																									463.1	17.6927	344.1	19.6535	325.5	14.5168
																																									463.6	17.7412	344.7	19.7076	326.1	14.5562
																																									463.8	17.7896	345.4	19.7618	326.3	14.5957
																																									463.9	17.8381	345.5	19.8159	327.1	14.6351
																																									464.5	17.8866	346	19.8701	330.3	14.6746
																																									464.7	17.935	348.3	19.9242	330.6	14.714
																																									466.4	17.9835	350	19.9783	332.2	14.7535
																																									466.8	18.032	354	20.0325	332.4	14.7929
																																									467.7	18.0805	354.3	20.1408	333.3	14.8323
																																									469.2	18.1289	354.9	20.2491	333.5	14.8718
																																									470.9	18.1774	355.2	20.3032	334.3	14.9112
																																									471.4	18.2259	355.7	20.3573	335.3	14.9507
																																									472.1	18.3228	356.1	20.4115	336.9	14.9901
																																									473	18.3713	357	20.4656	337	15.0296
																																									474	18.4198	359.4	20.5198	337.2	15.069
																																									476.8	18.4683	359.7	20.5739	338.8	15.1085
																																									479.3	18.5167	361.4	20.628	339.9	15.1479
																																									480.4	18.5652	361.7	20.6822	340.2	15.1874
																																									482.1	18.6137	362.2	20.7363	341.1	15.2268
																																									482.7	18.6621	364.2	20.7905	342	15.2663
																																									485.1	18.7106	364.7	20.8446	342.9	15.3057
																																									485.7	18.7591	365	20.8988	344	15.3452
																																									486.9	18.8076	367	20.9529	344.1	15.3846
																																									489	18.856	368.2	21.007	346.7	15.4241
																																									489.1	18.9045	368.3	21.0612	347.7	15.4635
																																									492.9	18.953	368.7	21.1153	348.2	15.503
																																									494.1	19.0015	369.5	21.1695	349.9	15.5424
																																									494.5	19.0499	371.3	21.2236	350.2	15.5819
																																									498.1	19.0984	371.6	21.2777	351.2	15.6607
																																									503.9	19.1469	372	21.3319	351.3	15.7002
																																									504.6	19.1953	372.4	21.386	352.4	15.7396
																																									505.5	19.2438	373	21.4402	352.8	15.7791
																																									507.9	19.2923	373.6	21.4943	353.1	15.8185
																																									508.2	19.3408	374.8	21.5485	354.1	15.858
																																									513.2	19.3892	376.8	21.6026	354.2	15.8974
																																									513.5	19.4377	376.9	21.6567	354.4	15.9369
																																									514.9	19.4862	380.6	21.7109	355.5	15.9763
																																									517.5	19.5347	381.6	21.765	356	16.0158
																																									521.7	19.5831	386.4	21.8192	356.1	16.0552
																																									522.4	19.6316	387.4	21.8733	359.1	16.0947
																																									525.2	19.6801	388.1	21.9816	359.2	16.1736
																																									525.6	19.7286	389.8	22.0357	359.9	16.213
																																									526.8	19.777	390.3	22.0899	361.5	16.2525
																																									527.2	19.8255	390.6	22.144	361.9	16.3314
																																									529.8	19.874	390.9	22.1982	363.2	16.3708
																																									530.1	19.9224	392.1	22.2523	365.8	16.4103
																																									530.4	19.9709	392.3	22.3064	366.2	16.4497
																																									532.2	20.0194	394.3	22.3606	368.1	16.4892
																																									533.9	20.1163	394.5	22.4147	368.8	16.5286
																																									538.9	20.1648	394.8	22.4689	371.7	16.6075
																																									539	20.2133	397.2	22.523	373.3	16.6469
																																									543.1	20.2618	399.3	22.5772	373.8	16.6864
																																									544.2	20.3102	399.5	22.6313	375	16.7258
																																									545.3	20.3587	399.7	22.6854	376	16.7653
																																									548	20.4072	400.5	22.7396	378.2	16.8047
																																									549	20.4556	402	22.7937	378.5	16.8836
																																									550	20.5041	402.9	22.8479	379.1	16.9231
																																									550.8	20.5526	403.7	22.902	379.9	16.9625
																																									550.9	20.6011	403.8	22.9561	380.9	17.002
																																									551	20.6495	404.6	23.0103	381.1	17.0414
																																									554	20.698	404.7	23.0644	382.3	17.0809
																																									558.4	20.7465	406.1	23.1186	382.6	17.1203
																																									561.2	20.795	407.2	23.1727	383.2	17.1598
																																									561.4	20.8434	408.6	23.2269	384.5	17.1992
																																									564.7	20.8919	408.8	23.281	386.7	17.2387
																																									566.1	20.9404	413.1	23.3351	387.4	17.2781
																																									569.9	20.9889	413.5	23.3893	387.6	17.357
																																									570.7	21.0373	414.4	23.4434	388.3	17.3964
																																									572.1	21.0858	416	23.4976	388.8	17.4359
																																									575.7	21.1343	417.1	23.5517	389.4	17.4753
																																									576.3	21.1827	418.3	23.6058	390	17.5148
																																									578.8	21.2312	418.5	23.66	390.3	17.5542
																																									579.5	21.2797	419.5	23.7141	391.1	17.5937
																																									580	21.3282	419.7	23.7683	392.8	17.6331
																																									580.4	21.4251	421.7	23.8224	394.9	17.712
																																									580.9	21.4736	422.5	23.8766	395	17.7515
																																									582.2	21.5221	423	23.9307	395.4	17.7909
																																									583.3	21.5705	424.9	23.9848	395.8	17.8304
																																									587.9	21.619	426	24.039	397	17.8698
																																									588.5	21.6675	426.6	24.0931	397.2	17.9093
																																									591.8	21.7159	427.1	24.1473	397.5	17.9487
																																									593.5	21.7644	427.9	24.2014	399.6	17.9882
																																									595.8	21.8129	428.7	24.2555	400.2	18.0276
																																									596.3	21.8614	430	24.3097	401.4	18.0671
																																									596.7	21.9098	430.6	24.3638	402.8	18.1065
																																									598.8	21.9583	431.1	24.418	403.5	18.146
																																									600.3	22.0068	433.8	24.4721	406.3	18.1854
																																									601.8	22.0553	434.8	24.5263	408.1	18.2249
																																									606.2	22.1037	434.9	24.5804	408.8	18.2643
																																									607.3	22.1522	436.9	24.6345	409.7	18.3037
																																									611.3	22.2007	440.2	24.7428	410.1	18.3432
																																									612.2	22.2492	443.2	24.797	411.7	18.3826
																																									613.3	22.2976	444.1	24.8511	412.8	18.4221
																																									614.1	22.3461	446.9	24.9053	413.1	18.4615
																																									617.1	22.3946	447.3	24.9594	415.1	18.501
																																									619.7	22.443	449.8	25.0135	416.5	18.5404
																																									621.1	22.4915	450	25.0677	417.2	18.5799
																																									622	22.54	450.9	25.1218	418.4	18.6193
																																									624.5	22.5885	451.9	25.176	418.7	18.6588
																																									625.5	22.6369	453.1	25.2842	420	18.7377
																																									626.1	22.6854	454.3	25.3925	420.1	18.7771
																																									626.9	22.7339	455.5	25.4467	420.2	18.8166
																																									627.3	22.7824	457.4	25.5008	421.1	18.856
																																									627.4	22.8308	460.3	25.555	421.4	18.8955
																																									628	22.8793	461.3	25.6091	421.6	18.9349
																																									628.5	22.9278	464.4	25.6632	423.9	18.9744
																																									629.4	22.9762	466.8	25.7174	424	19.0138
																																									633.3	23.0247	467.2	25.7715	424.4	19.0533
																																									633.8	23.0732	469	25.8257	425.7	19.0927
																																									635.1	23.1217	471.5	25.8798	426	19.1321
																																									635.3	23.1701	472.2	25.9339	426.6	19.1716
																																									637.9	23.2186	474	25.9881	427.1	19.2505
																																									639	23.2671	475.3	26.0422	427.5	19.2899
																																									639.4	23.3156	476.5	26.0964	427.9	19.3294
																																									641	23.364	477.1	26.1505	429.4	19.3688
																																									641.1	23.4125	478.2	26.2588	431.1	19.4083
																																									642.5	23.461	478.8	26.3129	431.2	19.4477
																																									644.7	23.5095	478.9	26.3671	432.4	19.4872
																																									646.2	23.6064	481.8	26.4212	434.1	19.5266
																																									647.5	23.6549	485.5	26.4754	435.4	19.5661
																																									648	23.7033	487	26.5295	438	19.6055
																																									648.1	23.7518	488.7	26.5836	439.8	19.645
																																									649.3	23.8003	489.7	26.6378	440	19.6844
																																									651.7	23.8488	490.2	26.6919	442.3	19.7239
																																									652.8	23.8972	490.4	26.7461	443.4	19.7633
																																									655.4	23.9457	490.5	26.8002	443.7	19.8028
																																									656.2	24.0427	490.9	26.8544	444.3	19.8422
																																									659.9	24.0911	491.6	26.9085	445.1	19.8817
																																									663.6	24.1396	492.5	26.9626	446.2	19.9211
																																									663.9	24.1881	493.3	27.0168	447	19.9606
																																									664.3	24.2365	495.8	27.0709	448	20
																																									664.6	24.285	496.2	27.1251	448.3	20.0394
																																									665.7	24.3335	497.4	27.1792	448.5	20.0789
																																									667.4	24.382	497.9	27.2334	448.7	20.1183
																																									668.7	24.4304	500.2	27.2875	449.4	20.1578
																																									670.4	24.4789	503.1	27.3416	450.1	20.1972
																																									671.1	24.5274	503.8	27.3958	451.5	20.2367
																																									675.4	24.5759	506.8	27.4499	453	20.2761
																																									676.9	24.6243	507.5	27.5041	454.3	20.3156
																																									677.4	24.6728	508.2	27.6123	455.6	20.355
																																									677.9	24.7213	508.5	27.6665	456.1	20.3945
																																									678.5	24.7698	509.2	27.7748	458.9	20.4339
																																									679.1	24.8182	510.2	27.8289	459.3	20.4734
																																									679.9	24.8667	511	27.8831	459.6	20.5128
																																									680.3	24.9152	511.5	27.9372	461.4	20.5523
																																									680.7	24.9636	512.4	27.9913	461.8	20.5917
																																									681.3	25.0121	512.5	28.0455	462.7	20.6312
																																									682.1	25.0606	514.2	28.0996	466.8	20.7101
																																									685.9	25.1091	515.8	28.1538	467.8	20.7495
																																									689.9	25.1575	516.1	28.262	468.1	20.789
																																									694.5	25.206	516.2	28.3162	468.3	20.8284
																																									695.1	25.2545	518.5	28.3703	470	20.8679
																																									695.4	25.303	520.8	28.4245	472.4	20.9073
																																									696.4	25.3514	528.1	28.4786	473	20.9467
																																									696.6	25.3999	528.7	28.5328	476.5	20.9862
																																									700.7	25.4484	529.1	28.5869	477.7	21.0256
																																									701.2	25.4968	529.2	28.641	477.9	21.0651
																																									701.6	25.5453	530.2	28.6952	478	21.1045
																																									704.7	25.5938	531.7	28.7493	478.2	21.144
																																									704.9	25.6423	533	28.8035	478.4	21.1834
																																									706.5	25.6907	534.4	28.8576	479	21.2623
																																									706.7	25.7392	534.5	28.9117	480	21.3018
																																									707.8	25.7877	535.7	28.9659	483	21.3412
																																									708.5	25.8362	536.5	29.02	483.5	21.3807
																																									713.1	25.8846	537.9	29.0742	485.8	21.4201
																																									713.2	25.9331	538.1	29.1283	486.4	21.4596
																																									714.8	25.9816	539.3	29.1825	487.3	21.499
																																									716.1	26.0301	540.2	29.2366	487.8	21.5385
																																									720.6	26.0785	541.1	29.2907	488.4	21.5779
																																									722.4	26.127	541.9	29.3449	491	21.6174
																																									722.5	26.1755	543.7	29.399	491.7	21.6568
																																									724.8	26.2239	544.6	29.4532	492	21.6963
																																									725.4	26.2724	546.4	29.5073	492.2	21.7357
																																									725.5	26.3209	546.5	29.5615	493.1	21.7751
																																									726.1	26.3694	547.9	29.6156	493.5	21.8146
																																									726.8	26.4178	551	29.6697	493.9	21.854
																																									728.5	26.4663	551.4	29.7239	494.9	21.8935
																																									730.9	26.5148	552.1	29.778	496	21.9329
																																									731.4	26.5633	552.6	29.8322	497.7	21.9724
																																									732.1	26.6117	554	29.8863	498.3	22.0118
																																									732.8	26.6602	554.3	29.9404	502.6	22.0513
																																									732.9	26.7087	554.8	29.9946	502.8	22.0907
																																									735.9	26.7571	555	30.0487	503.9	22.1302
																																									736.1	26.8056	555.3	30.157	504.2	22.1696
																																									737.5	26.8541	559.3	30.2112	504.3	22.2091
																																									738.6	26.9026	559.8	30.2653	505.3	22.288
																																									741.1	26.951	560.3	30.3194	505.6	22.3274
																																									743.4	26.9995	561.2	30.3736	505.8	22.3669
																																									748.3	27.048	561.5	30.4277	506.4	22.4063
																																									749.5	27.0965	563.7	30.4819	506.6	22.4458
																																									750.6	27.1449	565	30.536	507.4	22.4852
																																									754.8	27.1934	565.8	30.6443	508.4	22.5247
																																									756.3	27.2419	566.8	30.6984	510.5	22.5641
																																									756.7	27.2904	567.2	30.7526	510.6	22.6036
																																									762.1	27.3388	571.9	30.8067	517.6	22.643
																																									762.5	27.3873	577.3	30.8609	518.1	22.6824
																																									768.4	27.4358	577.4	30.915	519.4	22.7219
																																									770.2	27.4842	578	30.9691	521	22.7613
																																									772	27.5327	579.1	31.0233	522.3	22.8008
																																									776	27.5812	579.2	31.0774	523.9	22.8402
																																									776.2	27.6297	580.1	31.1316	524.4	22.8797
																																									776.6	27.6781	581.5	31.1857	524.7	22.9191
																																									780	27.7266	582.2	31.2398	524.8	22.9586
																																									781.7	27.7751	583.5	31.294	525.4	22.998
																																									784	27.8236	584.1	31.3481	525.6	23.0375
																																									784.1	27.872	584.5	31.4023	528	23.0769
																																									785	27.969	586.4	31.4564	528.5	23.1164
																																									786.4	28.0175	587.6	31.5106	529.3	23.1558
																																									786.9	28.0659	588.5	31.5647	529.4	23.1953
																																									790.9	28.1144	588.9	31.6188	529.6	23.2347
																																									795	28.1629	589.4	31.673	530.8	23.2742
																																									803.2	28.2113	589.8	31.7271	533.4	23.3136
																																									803.6	28.2598	593.6	31.7813	533.9	23.3531
																																									805	28.3083	594.2	31.8354	535.3	23.3925
																																									805.6	28.3568	594.7	31.8896	536	23.432
																																									805.7	28.4052	600	31.9437	536.6	23.4714
																																									809.8	28.4537	600.1	31.9978	537.2	23.5108
																																									812.1	28.5022	601.1	32.052	537.4	23.5503
																																									815.6	28.5507	601.4	32.1061	540.2	23.5897
																																									817.5	28.5991	602.2	32.1603	540.5	23.6292
																																									818.3	28.6476	603.5	32.2144	541	23.6686
																																									818.7	28.6961	606.9	32.2685	541.8	23.7081
																																									819	28.793	613.7	32.3768	542.6	23.7475
																																									821.5	28.8415	616	32.431	544.3	23.787
																																									823.9	28.89	617.4	32.4851	545.6	23.8264
																																									825	28.9384	617.9	32.5393	547.3	23.8659
																																									825.1	28.9869	618.6	32.5934	547.4	23.9053
																																									828.2	29.0354	619	32.6475	548.3	23.9448
																																									829	29.1323	621.3	32.7017	548.7	23.9842
																																									829.8	29.1808	623.5	32.7558	549.5	24.0237
																																									833	29.2293	625.4	32.81	549.8	24.0631
																																									837	29.2778	626.1	32.8641	550.5	24.1026
																																									837.1	29.3262	626.6	32.9182	550.8	24.142
																																									838	29.3747	627.3	32.9724	551.6	24.1815
																																									838.5	29.4232	633	33.0265	552.6	24.2209
																																									838.9	29.5201	634.3	33.0807	556.1	24.2604
																																									840.7	29.5686	634.7	33.1348	557.2	24.2998
																																									844.6	29.6171	634.9	33.189	558.4	24.3393
																																									844.8	29.6655	637.5	33.2431	561.5	24.3787
																																									845.6	29.714	637.7	33.2972	562.1	24.4181
																																									845.8	29.7625	637.8	33.3514	562.3	24.4576
																																									846.1	29.811	637.9	33.4055	563	24.497
																																									849	29.8594	638.1	33.4597	563.2	24.5365
																																									850.4	29.9564	639.4	33.5138	563.6	24.5759
																																									852	30.0048	639.8	33.5679	565	24.6154
																																									862.7	30.0533	641	33.6221	565.3	24.6548
																																									863.6	30.1018	641.1	33.6762	565.4	24.6943
																																									863.7	30.1503	641.6	33.7304	568.7	24.7337
																																									863.9	30.1987	642.5	33.7845	569	24.7732
																																									865.2	30.2472	645.4	33.8387	571.2	24.8126
																																									866.5	30.2957	646.4	33.8928	571.7	24.8521
																																									866.7	30.3442	647.6	33.9469	572.8	24.8915
																																									870.3	30.3926	647.7	34.0011	573.7	24.931
																																									871	30.4411	648	34.0552	575.1	24.9704
																																									871.1	30.4896	648.4	34.1094	575.2	25.0099
																																									872.5	30.5381	649.3	34.1635	576.8	25.0493
																																									874.8	30.5865	651	34.2177	579.8	25.0888
																																									875.4	30.635	652.9	34.2718	580.3	25.1282
																																									877.5	30.6835	653.1	34.3259	581.4	25.1677
																																									879.8	30.7319	654.6	34.3801	582.1	25.2071
																																									882	30.7804	655.7	34.4342	582.3	25.2465
																																									883.8	30.8289	655.8	34.4884	586.9	25.286
																																									887.2	30.8774	658.7	34.5425	588.1	25.3254
																																									887.6	30.9258	659.6	34.5966	588.9	25.3649
																																									897.5	30.9743	660.2	34.6508	591.9	25.4043
																																									898.9	31.0228	661.3	34.7049	592.3	25.4438
																																									900.9	31.0713	662.9	34.8132	592.7	25.4832
																																									902.6	31.1197	663	34.8674	596.6	25.5227
																																									904.2	31.1682	663.6	34.9215	596.8	25.5621
																																									904.5	31.2167	664.1	34.9756	598.3	25.6016
																																									904.7	31.2651	664.7	35.0298	599.2	25.641
																																									909	31.3136	666.7	35.0839	599.3	25.6805
																																									912.1	31.3621	671.2	35.1381	599.4	25.7594
																																									913.1	31.4106	675.5	35.1922	599.8	25.8383
																																									915.1	31.459	676.1	35.2463	601.1	25.8777
																																									915.4	31.5075	677	35.3005	601.6	25.9172
																																									918.9	31.556	678	35.3546	603.2	25.9566
																																									924.9	31.6045	678.1	35.4088	604.6	25.9961
																																									926.9	31.6529	679.7	35.4629	604.7	26.0355
																																									929.7	31.7014	680.8	35.5171	607.2	26.075
																																									930.2	31.7499	681.3	35.5712	608	26.1144
																																									932.4	31.7984	682.9	35.6253	608.2	26.1538
																																									932.8	31.8468	689.3	35.6795	608.7	26.1933
																																									933.5	31.8953	689.7	35.7336	610.9	26.2327
																																									934.8	31.9438	691.3	35.7878	612.1	26.2722
																																									935.4	31.9922	692.2	35.8419	612.3	26.3116
																																									938.5	32.0407	693.3	35.896	614.1	26.3511
																																									939.6	32.0892	696.4	35.9502	615	26.3905
																																									939.8	32.1377	696.9	36.0043	615.3	26.43
																																									940.2	32.1861	698.5	36.0585	616.2	26.4694
																																									940.7	32.2346	698.8	36.1126	618.9	26.5089
																																									941.7	32.2831	699.5	36.1668	619.4	26.5483
																																									942.6	32.3316	700.9	36.2209	619.5	26.5878
																																									946.6	32.38	701.2	36.275	619.8	26.6272
																																									950	32.4285	705.7	36.3292	620	26.6667
																																									950.7	32.5254	705.8	36.3833	623.6	26.7061
																																									951.5	32.5739	708.3	36.4375	623.9	26.7456
																																									953.3	32.6224	708.9	36.4916	627.5	26.785
																																									953.7	32.6709	709.6	36.5457	628.1	26.8245
																																									954.1	32.7193	710.1	36.5999	628.8	26.8639
																																									956	32.7678	711.3	36.654	629.4	26.9034
																																									956.1	32.8163	711.9	36.7082	629.9	26.9428
																																									956.6	32.8648	713.5	36.7623	630.5	26.9822
																																									957.5	32.9132	714.9	36.8165	631.2	27.0217
																																									965.2	32.9617	719	36.8706	633.2	27.0611
																																									967.4	33.0102	720	36.9247	633.4	27.1006
																																									971.7	33.0587	720.1	36.9789	633.8	27.14
																																									971.9	33.1071	729.8	37.033	633.9	27.1795
																																									973.6	33.1556	730.3	37.0872	634.6	27.2189
																																									975	33.2041	732	37.1413	635.5	27.2584
																																									976	33.2525	732.7	37.1955	639.1	27.2978
																																									977.2	33.301	733.1	37.2496	640.9	27.3373
																																									977.4	33.3495	733.2	37.3037	641.1	27.3767
																																									977.8	33.398	740.3	37.3579	641.2	27.4162
																																									983	33.4464	742.2	37.412	643.4	27.4556
																																									984.4	33.4949	743.9	37.4662	644.2	27.4951
																																									992.2	33.5434	744.1	37.5203	645.3	27.5345
																																									992.9	33.5919	744.9	37.5744	645.8	27.574
																																									993.7	33.6403	745	37.6286	645.9	27.6134
																																									996.7	33.6888	745.8	37.6827	646.7	27.6529
																																									997.6	33.7373	745.9	37.7369	648	27.7318
																																									1000.3	33.7857	747.7	37.791	648.4	27.7712
																																									1001.2	33.8342	750.2	37.8452	649.1	27.8107
																																									1001.4	33.8827	751.1	37.8993	655.5	27.8895
																																									1004	33.9312	753.1	37.9534	656.1	27.929
																																									1004.3	33.9796	755.5	38.0076	657.9	27.9684
																																									1005.2	34.0281	755.9	38.0617	658.1	28.0079
																																									1005.8	34.0766	756.3	38.1159	659.8	28.0473
																																									1007.4	34.1251	757	38.17	660.6	28.0868
																																									1010.1	34.1735	758.2	38.2241	661.6	28.1262
																																									1011.7	34.222	758.7	38.2783	661.8	28.1657
																																									1012	34.2705	761.7	38.3324	662.2	28.2051
																																									1012.4	34.319	762.5	38.3866	664	28.2446
																																									1014	34.3674	763.3	38.4407	667.2	28.284
																																									1014.4	34.4159	764.7	38.4949	668.3	28.3235
																																									1014.6	34.4644	765.5	38.549	670.2	28.3629
																																									1016.1	34.5128	766.1	38.6031	672.8	28.4024
																																									1020	34.5613	766.6	38.6573	673	28.4418
																																									1022.4	34.6098	768	38.7114	674.3	28.4813
																																									1023.1	34.6583	768.2	38.7656	675.2	28.5207
																																									1023.6	34.7067	772	38.8197	676.9	28.5602
																																									1024.6	34.7552	774	38.8738	677.4	28.5996
																																									1027.3	34.8037	774.7	38.928	679.1	28.6785
																																									1029	34.8522	782.8	38.9821	680.1	28.7179
																																									1030.9	34.9006	783.6	39.0363	683.1	28.7574
																																									1031.2	34.9491	784.8	39.0904	683.7	28.7968
																																									1032.3	34.9976	785	39.1987	684.2	28.8363
																																									1038.4	35.046	785.2	39.2528	684.5	28.8757
																																									1043.4	35.0945	785.7	39.307	685	28.9152
																																									1043.8	35.143	786	39.3611	686.4	28.9546
																																									1044.8	35.1915	788.1	39.4153	688.7	28.9941
																																									1045.8	35.2399	793.1	39.4694	690.3	29.0335
																																									1046.4	35.2884	793.4	39.5236	691.2	29.073
																																									1047.3	35.3369	793.7	39.5777	694.6	29.1124
																																									1047.4	35.3854	796.7	39.6318	697.7	29.1519
																																									1050.6	35.4338	798	39.686	698.5	29.1913
																																									1053.9	35.4823	801.4	39.7401	702.5	29.2308
																																									1054.8	35.5308	803.5	39.7943	704.6	29.2702
																																									1058.2	35.5793	806.6	39.8484	706.9	29.3097
																																									1058.8	35.6277	806.9	39.9025	709.1	29.3491
																																									1059	35.6762	807.7	39.9567	709.8	29.3886
																																									1061	35.7247	808.1	40.0108	712.2	29.428
																																									1061.7	35.7731	811.2	40.1191	715.5	29.4675
																																									1064.8	35.8216	812.6	40.1733	720.3	29.5069
																																									1078.6	35.8701	813.4	40.2274	720.7	29.5464
																																									1079.8	35.9186	815.8	40.2815	724.2	29.5858
																																									1083.1	35.967	816.1	40.3357	724.3	29.6252
																																									1084.7	36.0155	817.3	40.3898	728.9	29.6647
																																									1087.4	36.064	818.8	40.444	733.8	29.7041
																																									1091.2	36.1609	819.6	40.4981	738.2	29.7436
																																									1093.8	36.2094	821.8	40.5522	739.6	29.783
																																									1095.2	36.2579	825.6	40.6064	740.1	29.8225
																																									1095.9	36.3063	826.6	40.6605	740.6	29.8619
																																									1096.9	36.3548	827.8	40.7147	741.6	29.9014
																																									1097.3	36.4033	828.3	40.7688	742.4	29.9408
																																									1097.9	36.4518	828.9	40.823	742.5	29.9803
																																									1101.5	36.5002	829	40.9312	743.3	30.0197
																																									1104	36.5487	831.1	40.9854	744.1	30.0592
																																									1105.3	36.5972	831.9	41.0395	745.1	30.0986
																																									1107.4	36.6457	833.2	41.0937	746.3	30.1381
																																									1107.6	36.6941	834.7	41.1478	747.1	30.1775
																																									1113	36.7426	839.4	41.2019	747.3	30.217
																																									1114.7	36.7911	842.1	41.2561	752.5	30.2564
																																									1117.4	36.8396	843.6	41.3102	754.7	30.2959
																																									1118.1	36.888	844.2	41.3644	755.2	30.3353
																																									1118.8	36.9365	845.3	41.4185	757.2	30.3748
																																									1119.4	36.985	847	41.4727	757.8	30.4142
																																									1125.8	37.0334	847.8	41.5268	758.3	30.4536
																																									1127.5	37.0819	848.4	41.6351	760.1	30.4931
																																									1127.6	37.1304	848.6	41.6892	761.8	30.5325
																																									1127.7	37.1789	849.4	41.7434	763.4	30.572
																																									1128.4	37.2273	849.9	41.7975	764.6	30.6114
																																									1130.1	37.2758	851.1	41.8517	764.9	30.6509
																																									1132	37.3243	852.4	41.9058	771.4	30.6903
																																									1133.5	37.3728	854	42.0141	772.3	30.7298
																																									1134.2	37.4212	854.6	42.0682	773.6	30.7692
																																									1136.1	37.4697	855.6	42.1224	774.2	30.8087
																																									1139	37.5182	858.4	42.1765	775.7	30.8481
																																									1140.1	37.5667	859.2	42.2306	779.1	30.8876
																																									1146.3	37.6151	862.1	42.2848	781.6	30.927
																																									1146.4	37.6636	865.3	42.3389	782.4	30.9665
																																									1147	37.7605	865.4	42.3931	782.8	31.0059
																																									1147.6	37.809	867.4	42.4472	784	31.0454
																																									1148.2	37.8575	872.6	42.5014	784.1	31.0848
																																									1152.1	37.906	875.7	42.6096	785.1	31.1243
																																									1153.9	37.9544	876.8	42.6638	786	31.1637
																																									1154.8	38.0029	879.6	42.7179	787.9	31.2032
																																									1158.3	38.0514	881.5	42.7721	791.5	31.2426
																																									1159.3	38.0999	882.4	42.8262	791.8	31.2821
																																									1168.6	38.1483	882.5	42.8803	792.9	31.3215
																																									1168.9	38.1968	882.9	43.0428	793.3	31.3609
																																									1169.2	38.2453	883.4	43.0969	793.4	31.4004
																																									1171.2	38.2937	885.5	43.1511	794.9	31.4398
																																									1173.8	38.3422	885.8	43.2052	795.5	31.4793
																																									1176.5	38.3907	887.8	43.2593	796	31.5187
																																									1176.9	38.4392	888.2	43.3135	796.3	31.5582
																																									1177.9	38.4876	888.6	43.3676	798.6	31.5976
																																									1181.1	38.5361	890.3	43.4218	798.9	31.6371
																																									1181.7	38.5846	890.7	43.4759	799.3	31.6765
																																									1186.7	38.6331	895	43.5842	799.5	31.716
																																									1187.9	38.6815	895.1	43.6383	800.1	31.7554
																																									1188	38.73	896.4	43.6925	802.2	31.7949
																																									1189.5	38.7785	899.4	43.8008	804.6	31.8343
																																									1190.8	38.827	907.8	43.8549	805.7	31.8738
																																									1201.6	38.8754	909.3	43.909	807.5	31.9132
																																									1202	38.9239	909.4	43.9632	807.6	31.9527
																																									1208.3	38.9724	912.2	44.0173	810.1	31.9921
																																									1210.5	39.0208	913	44.0715	810.6	32.0316
																																									1212.2	39.0693	913.1	44.1256	813.5	32.071
																																									1217.4	39.1178	914.4	44.1798	817.3	32.1105
																																									1218	39.1663	919.3	44.2339	817.4	32.1499
																																									1220.5	39.2147	920.4	44.288	820.6	32.1893
																																									1221.2	39.2632	920.8	44.3422	821.4	32.2288
																																									1221.9	39.3117	924.3	44.3963	821.6	32.2682
																																									1222.6	39.3602	925.5	44.4505	823.5	32.3077
																																									1224.5	39.4086	926.7	44.5046	824.3	32.3471
																																									1225.3	39.4571	926.9	44.5587	825.9	32.3866
																																									1226.4	39.5056	929.6	44.6129	828.9	32.426
																																									1228.5	39.554	930.3	44.667	829.3	32.4655
																																									1231.3	39.6025	930.4	44.7212	829.6	32.5049
																																									1235.6	39.651	931.1	44.7753	830.1	32.5444
																																									1236	39.6995	931.3	44.8295	832.2	32.5838
																																									1239.5	39.7479	934.4	44.8836	833.5	32.6233
																																									1239.9	39.7964	938.5	44.9377	834.3	32.6627
																																									1241.8	39.8449	939.8	44.9919	834.6	32.7022
																																									1242.6	39.9418	940.3	45.046	837	32.7416
																																									1247.7	39.9903	943.3	45.1002	838.2	32.7811
																																									1249.3	40.0388	943.8	45.1543	840.5	32.8205
																																									1250.5	40.0873	946.7	45.2084	842.3	32.86
																																									1253.5	40.1357	948	45.2626	842.7	32.8994
																																									1255.2	40.1842	949.1	45.3167	843.5	32.9389
																																									1256.8	40.2327	951	45.3709	844.4	32.9783
																																									1258.3	40.2811	953	45.425	844.7	33.0178
																																									1260.7	40.3296	955.5	45.4792	846.5	33.0572
																																									1262.3	40.3781	957.1	45.5333	847.6	33.0966
																																									1263.7	40.4266	961.9	45.5874	848.6	33.1361
																																									1265.6	40.475	963.4	45.6416	848.9	33.1755
																																									1266.2	40.5235	965.3	45.6957	849.8	33.215
																																									1270.6	40.572	966.3	45.7499	851.5	33.2544
																																									1277	40.6205	967.8	45.804	851.8	33.2939
																																									1277.8	40.6689	969.7	45.8581	852	33.3333
																																									1279.6	40.7174	970.2	45.9123	853.2	33.3728
																																									1286.7	40.7659	971	45.9664	853.4	33.4122
																																									1288.1	40.8143	971.7	46.0206	854.1	33.4517
																																									1289.7	40.8628	977	46.0747	856	33.4911
																																									1293	40.9113	980.7	46.1289	857	33.5306
																																									1295.5	40.9598	982.8	46.183	857.4	33.57
																																									1297.2	41.0082	986.7	46.2371	857.9	33.6095
																																									1297.6	41.0567	992	46.2913	858.4	33.6489
																																									1299.1	41.1052	993	46.3454	858.6	33.6884
																																									1301	41.1537	996.5	46.3996	860.6	33.7278
																																									1303.8	41.2021	1002.1	46.4537	861.2	33.7673
																																									1304.9	41.2506	1002.6	46.5079	862.3	33.8067
																																									1308.3	41.2991	1003.7	46.562	863.3	33.8462
																																									1331.2	41.3476	1004.6	46.6161	865.8	33.8856
																																									1331.5	41.396	1005.8	46.6703	867.8	33.925
																																									1331.8	41.4445	1006.3	46.7244	869	33.9645
																																									1334.2	41.493	1006.6	46.7786	869.3	34.0039
																																									1335.8	41.5414	1006.7	46.8327	871.2	34.0434
																																									1336.9	41.5899	1007.2	46.8868	871.3	34.0828
																																									1345.3	41.6384	1008.9	46.941	871.9	34.1223
																																									1353.2	41.6869	1010.8	46.9951	875	34.1617
																																									1354.5	41.7353	1011.8	47.0493	877.5	34.2012
																																									1355.9	41.7838	1013.9	47.1034	877.9	34.2406
																																									1361	41.8323	1014.9	47.1576	880.4	34.2801
																																									1361.8	41.8808	1016.9	47.2117	880.8	34.3195
																																									1363.7	41.9292	1017.2	47.2658	882.7	34.359
																																									1363.9	41.9777	1019	47.32	882.9	34.3984
																																									1364.4	42.0262	1021.2	47.3741	883.9	34.4379
																																									1368.5	42.0746	1021.4	47.4283	884.7	34.4773
																																									1372.8	42.1231	1022	47.4824	885	34.5168
																																									1373.1	42.1716	1022.7	47.5365	885.4	34.5562
																																									1374.1	42.2201	1025.1	47.5907	886.5	34.6351
																																									1382.3	42.2685	1026.2	47.6448	886.7	34.6746
																																									1386.1	42.317	1027	47.699	887.2	34.714
																																									1386.4	42.3655	1030.4	47.7531	887.5	34.7535
																																									1392.2	42.414	1030.9	47.8073	888	34.7929
																																									1394.4	42.4624	1031.4	47.8614	891.1	34.8323
																																									1395	42.5109	1032	47.9155	893.1	34.8718
																																									1396.8	42.5594	1032.9	47.9697	893.8	34.9112
																																									1403.8	42.6079	1034.8	48.0238	894.8	34.9507
																																									1407.8	42.6563	1035.3	48.078	901.5	34.9901
																																									1407.9	42.7048	1035.7	48.1321	901.8	35.0296
																																									1408	42.7533	1036.6	48.1862	903.5	35.069
																																									1409.3	42.8017	1037.3	48.2404	904.1	35.1085
																																									1412	42.8502	1038	48.2945	906	35.1479
																																									1415.1	42.8987	1038.6	48.3487	906.6	35.1874
																																									1419.6	42.9472	1043.8	48.4028	906.8	35.2268
																																									1423.1	42.9956	1046.2	48.457	909.5	35.2663
																																									1423.9	43.0441	1046.4	48.5111	909.8	35.3057
																																									1426.2	43.0926	1051	48.5652	910.6	35.3452
																																									1429	43.1411	1055.9	48.6194	910.7	35.3846
																																									1429.4	43.1895	1057.1	48.6735	911.5	35.4241
																																									1430.9	43.238	1058.9	48.7277	911.7	35.503
																																									1432.8	43.2865	1059	48.7818	913.4	35.5819
																																									1434.9	43.3349	1059.3	48.8901	914.3	35.6213
																																									1437.2	43.3834	1060.3	48.9442	915.6	35.6607
																																									1439.6	43.4319	1061.2	48.9984	916.1	35.7002
																																									1440.2	43.4804	1061.5	49.0525	920.3	35.7396
																																									1441	43.5288	1063	49.1067	923.4	35.7791
																																									1442.2	43.5773	1063.4	49.1608	924.3	35.8185
																																									1449	43.6258	1063.9	49.2149	924.5	35.858
																																									1450.4	43.6743	1067.5	49.2691	928.5	35.8974
																																									1460.1	43.7227	1073	49.3232	930	35.9369
																																									1462.7	43.7712	1075.5	49.3774	930.8	35.9763
																																									1466.5	43.8197	1075.8	49.4315	930.9	36.0158
																																									1475	43.8682	1076.4	49.4857	931.7	36.0552
																																									1476.4	43.9651	1077.9	49.5398	933.4	36.0947
																																									1476.7	44.0136	1079.1	49.5939	935	36.1341
																																									1477	44.062	1080.6	49.6481	937.2	36.1736
																																									1483.1	44.1105	1081.4	49.7022	937.5	36.213
																																									1486.1	44.159	1082	49.7564	937.7	36.2525
																																									1488.5	44.2559	1082.3	49.8105	939.8	36.2919
																																									1493.7	44.3044	1087.6	49.8646	940.1	36.3314
																																									1494.8	44.3529	1088.3	49.9188	941.7	36.3708
																																									1494.9	44.4014	1089.9	49.9729	942.6	36.4103
																																									1496.1	44.4498	1093.7	50.0271	943	36.4497
																																									1496.5	44.4983	1098	50.0812	944.1	36.4892
																																									1496.6	44.5468	1098.9	50.1354	946.4	36.568
																																									1499.9	44.5952	1099.2	50.1895	947.9	36.6075
																																									1500.5	44.6437	1103	50.2436	948.5	36.6469
																																									1502.4	44.6922	1103.3	50.2978	951.2	36.6864
																																									1507.2	44.7407	1103.5	50.3519	952	36.7258
																																									1508.8	44.7891	1104.6	50.4061	954.2	36.7653
																																									1511.8	44.8376	1111.1	50.4602	955.2	36.8047
																																									1512.3	44.8861	1111.3	50.5143	957.8	36.8442
																																									1513.5	44.9346	1112.1	50.5685	960	36.8836
																																									1515.6	44.983	1116.3	50.6226	960.7	36.9231
																																									1518.4	45.0315	1119.8	50.6768	963	36.9625
																																									1518.9	45.08	1121.6	50.7309	964.5	37.002
																																									1520.3	45.1285	1123.7	50.7851	964.7	37.0414
																																									1520.4	45.1769	1123.9	50.8392	965.2	37.0809
																																									1521.5	45.2254	1124.8	50.8933	965.3	37.1203
																																									1522.1	45.2739	1129.4	50.9475	968.6	37.1598
																																									1523	45.3223	1132.8	51.0016	971.5	37.1992
																																									1526.4	45.3708	1133	51.0558	971.6	37.2387
																																									1528.6	45.4193	1134.5	51.1099	972.7	37.2781
																																									1531.1	45.4678	1135.6	51.164	973.8	37.3176
																																									1531.5	45.5162	1141.2	51.2182	977	37.357
																																									1534.9	45.5647	1142.3	51.2723	978.1	37.3964
																																									1537.2	45.6132	1142.5	51.3265	979.3	37.4359
																																									1539.3	45.6617	1144.7	51.3806	982.8	37.4753
																																									1544.8	45.7101	1151.9	51.4348	983.1	37.5148
																																									1545.6	45.7586	1152.8	51.4889	983.5	37.5542
																																									1546.1	45.8071	1158.9	51.543	985.2	37.5937
																																									1546.3	45.8556	1162.8	51.5972	986.1	37.6331
																																									1546.6	45.904	1163.8	51.7055	987.1	37.6726
																																									1546.9	45.9525	1164.4	51.8138	988.6	37.712
																																									1548	46.001	1166.7	51.8679	989.5	37.7515
																																									1548.8	46.0494	1168	51.922	991.5	37.7909
																																									1549.8	46.1464	1168.1	51.9762	993.4	37.8304
																																									1550.2	46.1949	1169.3	52.0303	994.8	37.9093
																																									1550.9	46.2433	1174	52.0845	998.8	37.9487
																																									1554.9	46.3403	1174.1	52.1386	1000.1	37.9882
																																									1556.2	46.3888	1174.3	52.1927	1001.5	38.0276
																																									1556.8	46.4372	1175.4	52.301	1002.2	38.0671
																																									1561.1	46.4857	1177.9	52.3552	1005.4	38.1065
																																									1562.3	46.5342	1188.3	52.4093	1006.9	38.146
																																									1564.6	46.5826	1189.9	52.4635	1008.3	38.1854
																																									1565.2	46.6311	1191.8	52.5176	1008.4	38.2249
																																									1565.5	46.6796	1197	52.5717	1011.5	38.2643
																																									1567.1	46.7281	1200	52.6259	1013.1	38.3037
																																									1567.5	46.7765	1200.1	52.68	1014	38.3432
																																									1574.6	46.825	1202.8	52.7342	1015.2	38.3826
																																									1576	46.8735	1204.4	52.7883	1016.8	38.4221
																																									1577.8	46.922	1207.2	52.8424	1016.9	38.4615
																																									1580	46.9704	1208.1	52.9507	1022.2	38.501
																																									1584.5	47.0189	1213.9	53.0049	1022.5	38.5404
																																									1585.2	47.0674	1215	53.059	1022.8	38.5799
																																									1588.6	47.1159	1215.1	53.1132	1023.2	38.6193
																																									1592.1	47.1643	1215.8	53.2214	1023.7	38.6588
																																									1593.3	47.2128	1216	53.2756	1028.2	38.6982
																																									1596.6	47.2613	1217.7	53.3297	1028.7	38.7377
																																									1597.7	47.3097	1219.5	53.3839	1029.4	38.8166
																																									1601.1	47.3582	1221.3	53.438	1031.2	38.856
																																									1602.8	47.4067	1221.8	53.4921	1032.1	38.8955
																																									1605.1	47.4552	1223.3	53.5463	1033.3	38.9349
																																									1606.6	47.5036	1225.6	53.6004	1040.5	38.9744
																																									1608.1	47.6006	1225.7	53.6546	1041.1	39.0138
																																									1608.5	47.6491	1226.1	53.7087	1043.2	39.0533
																																									1614.3	47.6975	1226.3	53.7629	1043.7	39.0927
																																									1615.9	47.746	1229.9	53.817	1044.7	39.1321
																																									1616.9	47.7945	1232.9	53.8711	1045	39.1716
																																									1617.6	47.8914	1233.8	53.9253	1045.1	39.2505
																																									1617.8	47.9399	1235.7	53.9794	1047.4	39.2899
																																									1619.8	47.9884	1238.1	54.0336	1047.6	39.3294
																																									1622.2	48.0368	1238.3	54.0877	1049.4	39.3688
																																									1623	48.0853	1240.1	54.1419	1050.9	39.4083
																																									1626.8	48.1338	1241.9	54.196	1055.2	39.4477
																																									1627.3	48.1823	1242.2	54.2501	1059.1	39.4872
																																									1627.9	48.2307	1242.5	54.3043	1059.8	39.5266
																																									1628.2	48.2792	1244.1	54.3584	1060.2	39.5661
																																									1628.8	48.3762	1245.2	54.4126	1060.5	39.6055
																																									1629.2	48.4246	1245.4	54.4667	1061.7	39.645
																																									1633.6	48.4731	1249.8	54.5208	1065.4	39.6844
																																									1634.4	48.5216	1251.6	54.575	1067.8	39.7239
																																									1634.5	48.57	1253.4	54.6291	1071.5	39.7633
																																									1638.8	48.6185	1254.9	54.6833	1076.2	39.8028
																																									1645.4	48.667	1255.6	54.7374	1076.5	39.8422
																																									1647.3	48.7155	1257.6	54.7916	1078.1	39.8817
																																									1647.5	48.7639	1258	54.8457	1078.9	39.9211
																																									1650.5	48.8124	1259.9	54.8998	1079.6	39.9606
																																									1651.5	48.8609	1264.2	54.954	1081.3	40
																																									1652	48.9094	1265.5	55.0081	1082.6	40.0394
																																									1656.7	48.9578	1266.7	55.0623	1083.8	40.0789
																																									1658.7	49.0063	1266.8	55.1164	1085.1	40.1183
																																									1664.1	49.0548	1268.2	55.1705	1086.5	40.1578
																																									1667.3	49.1032	1271.1	55.2247	1086.6	40.1972
																																									1667.7	49.1517	1272.3	55.2788	1089.6	40.2367
																																									1669.5	49.2002	1272.9	55.333	1089.8	40.2761
																																									1671.2	49.2487	1278.9	55.3871	1093	40.3156
																																									1671.3	49.2971	1279.6	55.4413	1093.8	40.355
																																									1674.5	49.3456	1283.1	55.4954	1094.9	40.3945
																																									1676.3	49.3941	1283.9	55.5495	1095.3	40.4339
																																									1680.4	49.4426	1284.6	55.6037	1097.3	40.4734
																																									1684.2	49.491	1284.9	55.6578	1097.8	40.5128
																																									1685.2	49.5395	1285.2	55.712	1098.6	40.5523
																																									1690.7	49.588	1286.4	55.7661	1101.5	40.5917
																																									1691.5	49.6365	1289.3	55.8202	1101.6	40.6312
																																									1693.7	49.6849	1290.4	55.8744	1104.9	40.6706
																																									1694.9	49.7334	1291.4	55.9285	1105	40.7101
																																									1696.8	49.7819	1291.5	55.9827	1105.5	40.7495
																																									1697.7	49.8303	1295.5	56.0368	1108.1	40.789
																																									1701.5	49.8788	1295.9	56.091	1111.4	40.8284
																																									1705.7	49.9273	1298.8	56.1451	1111.7	40.9073
																																									1706.5	49.9758	1301.8	56.1992	1122.8	40.9467
																																									1710.5	50.0242	1308.1	56.2534	1126.5	40.9862
																																									1710.8	50.0727	1309.2	56.3075	1128.4	41.0256
																																									1711.2	50.1212	1312.6	56.4158	1129.5	41.0651
																																									1711.3	50.1697	1313.9	56.47	1130.3	41.1045
																																									1712.4	50.2181	1319.8	56.5241	1132.3	41.144
																																									1712.5	50.2666	1319.9	56.5782	1133.1	41.1834
																																									1712.6	50.3151	1321.4	56.6324	1133.7	41.2229
																																									1715.4	50.3635	1325.2	56.6865	1135.6	41.2623
																																									1723.8	50.412	1331.9	56.7407	1137.2	41.3018
																																									1730.3	50.4605	1332.6	56.7948	1138.3	41.3412
																																									1734.2	50.509	1333	56.8489	1138.6	41.3807
																																									1738.5	50.5574	1333.3	56.9031	1139.3	41.4201
																																									1740.7	50.6059	1336.4	56.9572	1143.9	41.4596
																																									1740.9	50.6544	1340.3	57.0114	1144.4	41.499
																																									1749.6	50.7029	1342.9	57.0655	1147.9	41.5385
																																									1751.5	50.7513	1346	57.1197	1149.1	41.5779
																																									1752.9	50.7998	1346.4	57.1738	1150.5	41.6174
																																									1753.9	50.8483	1348.4	57.2279	1152.4	41.6568
																																									1756.5	50.8968	1348.9	57.2821	1155.2	41.6963
																																									1759.1	50.9452	1349.1	57.3362	1157.8	41.7357
																																									1761.3	50.9937	1350.5	57.3904	1158.3	41.7751
																																									1768.4	51.0422	1353.7	57.4445	1158.4	41.854
																																									1770.4	51.0906	1358	57.4986	1160.5	41.8935
																																									1773	51.1391	1364.1	57.5528	1162	41.9329
																																									1774	51.1876	1364.2	57.6069	1165.9	41.9724
																																									1776	51.2361	1365.7	57.6611	1166	42.0118
																																									1778.6	51.2845	1369.2	57.7152	1167.2	42.0513
																																									1784.1	51.333	1371.8	57.7694	1168.1	42.0907
																																									1784.3	51.43	1372.1	57.8235	1172.5	42.1302
																																									1785.4	51.4784	1373.8	57.8776	1176.2	42.1696
																																									1787.4	51.5269	1374.2	57.9318	1176.9	42.2091
																																									1791.9	51.5754	1375.7	57.9859	1177.5	42.2485
																																									1794.4	51.6238	1375.8	58.0401	1177.8	42.288
																																									1795.1	51.6723	1375.9	58.0942	1179.2	42.3274
																																									1796.9	51.7208	1377.7	58.1483	1179.5	42.3669
																																									1799.9	51.7693	1380	58.2025	1179.8	42.4063
																																									1802.4	51.8177	1381.7	58.2566	1183.8	42.4458
																																									1804.4	51.8662	1383.1	58.3108	1185.1	42.4852
																																									1806.1	51.9147	1385.1	58.3649	1187.7	42.5247
																																									1812.6	51.9632	1386	58.4191	1188.8	42.5641
																																									1813.7	52.0116	1386.1	58.4732	1189.2	42.6036
																																									1817.6	52.0601	1387.2	58.5273	1189.8	42.643
																																									1820	52.1086	1387.7	58.5815	1190.4	42.6824
																																									1823.1	52.1571	1390.1	58.6356	1190.5	42.7219
																																									1823.4	52.2055	1391.4	58.6898	1191.6	42.7613
																																									1824.3	52.254	1393.6	58.7439	1192.7	42.8008
																																									1827.2	52.3025	1394.6	58.7981	1196.5	42.8402
																																									1831.2	52.3509	1400.8	58.8522	1197.1	42.9191
																																									1832.9	52.3994	1401.6	58.9063	1203.4	42.9586
																																									1833.7	52.4479	1402	58.9605	1204.3	42.998
																																									1836.9	52.4964	1405.9	59.0146	1210.8	43.0375
																																									1838.4	52.5448	1409.5	59.0688	1210.9	43.0769
																																									1843.2	52.5933	1410.1	59.1229	1213.7	43.1164
																																									1844.3	52.6418	1410.7	59.177	1217.4	43.1558
																																									1846.8	52.6903	1415.1	59.2312	1222	43.1953
																																									1850.3	52.7387	1419.5	59.2853	1225.6	43.2347
																																									1852.3	52.7872	1420.4	59.3395	1232.8	43.2742
																																									1852.9	52.8357	1424.1	59.3936	1237.4	43.3136
																																									1854.4	52.8841	1424.2	59.4478	1239.3	43.3531
																																									1862.9	52.9326	1425.2	59.5019	1240	43.3925
																																									1863.2	52.9811	1427.1	59.556	1242.5	43.432
																																									1865.9	53.0296	1427.7	59.6643	1242.8	43.4714
																																									1866.3	53.078	1430.2	59.7185	1245.2	43.5108
																																									1867.3	53.1265	1430.4	59.7726	1245.9	43.5503
																																									1867.9	53.175	1431.1	59.8267	1246.8	43.5897
																																									1870.4	53.2235	1439.1	59.8809	1248.5	43.6292
																																									1872.3	53.2719	1440.3	59.935	1249.9	43.7081
																																									1872.5	53.3204	1442.2	59.9892	1250.4	43.7475
																																									1875.6	53.3689	1447.1	60.0433	1251.7	43.787
																																									1877.9	53.4174	1453.8	60.0975	1251.9	43.8264
																																									1879.3	53.4658	1456.2	60.1516	1254.7	43.8659
																																									1882.3	53.5143	1458.4	60.2057	1259.5	43.9053
																																									1882.4	53.5628	1459.2	60.2599	1260.7	43.9448
																																									1887.7	53.6112	1460.7	60.314	1263.7	43.9842
																																									1899.1	53.6597	1461.6	60.3682	1264.1	44.0237
																																									1903.9	53.7082	1464.3	60.4223	1265.1	44.0631
																																									1909.8	53.7567	1472.5	60.5306	1266.9	44.1026
																																									1919.3	53.8051	1480.5	60.5847	1269.3	44.142
																																									1922.2	53.8536	1492.5	60.6389	1270.9	44.1815
																																									1923.6	53.9021	1500.4	60.693	1271.5	44.2209
																																									1925.4	53.9506	1505.3	60.7472	1274.9	44.2604
																																									1925.7	53.999	1508.1	60.8013	1278.2	44.2998
																																									1928	54.0475	1508.3	60.8554	1281.1	44.3393
																																									1931	54.096	1509.9	60.9096	1281.3	44.3787
																																									1938.5	54.1444	1510	60.9637	1281.5	44.4181
																																									1941.3	54.1929	1510.1	61.0179	1284.5	44.4576
																																									1943.3	54.2414	1511.9	61.072	1288.2	44.497
																																									1947.8	54.2899	1524.4	61.1262	1289.9	44.5365
																																									1948.9	54.3383	1526.7	61.1803	1294.6	44.5759
																																									1954.1	54.3868	1527.7	61.2344	1294.8	44.6154
																																									1956.7	54.4353	1529.2	61.2886	1296.6	44.6548
																																									1959.9	54.4838	1531.6	61.3427	1296.9	44.6943
																																									1960.8	54.5322	1532.2	61.3969	1304.3	44.7337
																																									1969.4	54.5807	1539.4	61.451	1308.1	44.7732
																																									1971.9	54.6292	1545.3	61.5051	1308.8	44.8126
																																									1979.4	54.6777	1549	61.5593	1308.9	44.8521
																																									1981.3	54.7261	1550.4	61.6134	1313.7	44.8915
																																									1981.5	54.7746	1556.9	61.6676	1314.8	44.931
																																									1983.1	54.8715	1562	61.7217	1317	44.9704
																																									1985.5	54.92	1562.8	61.7759	1318.2	45.0099
																																									1986.2	54.9685	1562.9	61.83	1321.2	45.0493
																																									1996.2	55.017	1564.8	61.8841	1324.2	45.0888
																																									1997	55.0654	1566.1	61.9383	1324.9	45.1282
																																									1997.2	55.1139	1570.7	61.9924	1326.7	45.1677
																																									1997.9	55.2109	1574.8	62.0466	1331.5	45.2071
																																									2002.5	55.2593	1575	62.1548	1332.7	45.2465
																																									2005	55.3078	1576.6	62.209	1336.7	45.286
																																									2008.5	55.3563	1578.9	62.2631	1336.8	45.3254
																																									2014.8	55.4048	1579.9	62.3173	1338	45.3649
																																									2020.4	55.4532	1581.2	62.3714	1338.7	45.4043
																																									2031.1	55.5017	1581.9	62.4256	1341.4	45.4438
																																									2034.9	55.5502	1582.2	62.4797	1342.3	45.4832
																																									2037.6	55.5986	1585.9	62.5338	1344.5	45.5227
																																									2042.3	55.6471	1586.9	62.588	1345.7	45.5621
																																									2046.1	55.6956	1589.6	62.6421	1345.9	45.6016
																																									2049.6	55.7441	1591.1	62.6963	1346	45.641
																																									2051.9	55.7925	1595	62.7504	1346.2	45.6805
																																									2058.3	55.841	1598.2	62.8045	1346.7	45.7199
																																									2058.5	55.938	1600.2	62.8587	1348.8	45.7594
																																									2059.6	55.9864	1601.2	62.9128	1355.8	45.7988
																																									2067	56.0349	1601.7	62.967	1368.9	45.8383
																																									2070.2	56.0834	1603.1	63.0211	1369.1	45.8777
																																									2072.8	56.1318	1608	63.0753	1369.6	45.9172
																																									2075.5	56.1803	1623	63.1294	1371.4	45.9566
																																									2078.3	56.2288	1632.5	63.1835	1372.1	45.9961
																																									2079.2	56.2773	1635.8	63.2377	1374	46.0355
																																									2084.9	56.3257	1635.9	63.2918	1374.7	46.075
																																									2088.7	56.3742	1637.8	63.346	1378.2	46.1144
																																									2089.2	56.4227	1645.3	63.4001	1378.4	46.1538
																																									2090.1	56.4712	1646.8	63.4543	1379.1	46.1933
																																									2090.5	56.5196	1650.1	63.5084	1383.2	46.2327
																																									2093.2	56.5681	1654.5	63.5625	1385.9	46.2722
																																									2093.3	56.6166	1659.7	63.6167	1389.6	46.3116
																																									2101.4	56.6651	1662.9	63.6708	1390.2	46.3511
																																									2101.7	56.7135	1666.5	63.725	1393.4	46.3905
																																									2102.7	56.762	1667.2	63.7791	1393.5	46.43
																																									2103	56.8105	1668.1	63.8332	1393.9	46.4694
																																									2106.4	56.8589	1672.5	63.8874	1394.8	46.5089
																																									2110.7	56.9074	1673.3	63.9415	1400.3	46.5483
																																									2111.8	56.9559	1676	63.9957	1400.5	46.5878
																																									2118.6	57.0044	1676.6	64.0498	1401.3	46.6272
																																									2121.1	57.0528	1677.3	64.104	1402	46.6667
																																									2123.3	57.1013	1679.9	64.1581	1403.4	46.7061
																																									2124.6	57.1498	1680.2	64.2122	1403.7	46.7456
																																									2127.8	57.1983	1684	64.2664	1405	46.785
																																									2130.7	57.2467	1694.2	64.3205	1408	46.8245
																																									2130.8	57.2952	1708.7	64.3747	1408.4	46.8639
																																									2132.5	57.3437	1714	64.4288	1412.1	46.9034
																																									2134.4	57.3921	1718.9	64.4829	1418.5	46.9428
																																									2135.2	57.4406	1725.4	64.5912	1419.6	46.9822
																																									2135.4	57.4891	1738.2	64.6454	1421.5	47.0217
																																									2136.3	57.5376	1740	64.6995	1424.2	47.0611
																																									2138.2	57.586	1740.2	64.7537	1427.5	47.1006
																																									2140.4	57.6345	1743.1	64.8078	1431	47.14
																																									2141.9	57.683	1744	64.8619	1432.2	47.1795
																																									2143.5	57.7315	1744.7	64.9161	1434.7	47.2189
																																									2146.5	57.7799	1748	64.9702	1437.4	47.2584
																																									2149.2	57.8284	1755.4	65.0244	1439.8	47.2978
																																									2150.2	57.8769	1757	65.0785	1440	47.3373
																																									2151.3	57.9254	1757.3	65.1326	1441.3	47.3767
																																									2151.5	57.9738	1762.4	65.1868	1441.9	47.4162
																																									2163.8	58.0223	1764.6	65.2409	1445.6	47.4556
																																									2164.7	58.0708	1767.6	65.2951	1448.1	47.4951
																																									2166.3	58.1192	1768.1	65.3492	1448.2	47.5345
																																									2168.8	58.1677	1770	65.4034	1448.6	47.574
																																									2169.4	58.2162	1775.4	65.4575	1450.5	47.6134
																																									2170.3	58.2647	1776.3	65.5116	1453.9	47.6529
																																									2171.8	58.3131	1783.5	65.5658	1454	47.6923
																																									2180.4	58.3616	1784.4	65.6199	1455.2	47.7318
																																									2184.4	58.4101	1785.5	65.6741	1456.1	47.7712
																																									2185.1	58.4586	1789.2	65.7282	1458	47.8107
																																									2187.9	58.507	1789.7	65.7823	1458.2	47.8501
																																									2192.1	58.5555	1791.7	65.8365	1459.5	47.8895
																																									2196.6	58.604	1792.9	65.8906	1461	47.929
																																									2196.8	58.6524	1793.6	65.9448	1462.2	47.9684
																																									2200.1	58.7009	1793.9	65.9989	1462.7	48.0079
																																									2202.2	58.7494	1800.6	66.0531	1463.4	48.0473
																																									2202.9	58.7979	1800.7	66.1072	1466.9	48.0868
																																									2208.3	58.8463	1806.4	66.1613	1473.4	48.1262
																																									2212.7	58.8948	1815.2	66.2155	1473.9	48.1657
																																									2215.4	58.9433	1815.8	66.2696	1474	48.2051
																																									2219	58.9918	1816.8	66.3238	1475.4	48.2446
																																									2222.6	59.0402	1817.1	66.3779	1476.8	48.284
																																									2225.4	59.0887	1817.8	66.4321	1479.9	48.3235
																																									2227.3	59.1372	1822.7	66.4862	1483.7	48.3629
																																									2228.2	59.1857	1825	66.5403	1487.1	48.4024
																																									2228.6	59.2341	1828.5	66.5945	1487.6	48.4418
																																									2231.4	59.2826	1830.3	66.6486	1488.7	48.4813
																																									2233.6	59.3311	1833.9	66.7028	1489.6	48.5207
																																									2235.7	59.3795	1835.6	66.7569	1493.5	48.5602
																																									2236.7	59.428	1843.9	66.811	1496.7	48.5996
																																									2240.9	59.4765	1849.2	66.8652	1498.7	48.6391
																																									2242.1	59.525	1851.4	66.9193	1501.6	48.6785
																																									2242.7	59.5734	1853.6	66.9735	1502.7	48.7179
																																									2247.7	59.6219	1858.3	67.0276	1503.3	48.7574
																																									2252.5	59.6704	1859.9	67.0818	1504.9	48.7968
																																									2253.6	59.7189	1861.6	67.1359	1505.7	48.8363
																																									2260.1	59.7673	1862.8	67.19	1508.1	48.8757
																																									2272.6	59.8158	1863.8	67.2442	1511.1	48.9152
																																									2275.1	59.8643	1866	67.2983	1516.6	48.9546
																																									2275.2	59.9127	1867	67.3525	1519.9	48.9941
																																									2285.6	59.9612	1867.9	67.4066	1520.3	49.0335
																																									2292.4	60.0097	1872.5	67.4607	1521.5	49.073
																																									2294.1	60.0582	1875.8	67.5149	1526	49.1124
																																									2308.9	60.1066	1881.5	67.569	1526.4	49.1519
																																									2310.5	60.1551	1882.4	67.6232	1528.3	49.1913
																																									2311.6	60.2036	1883.2	67.6773	1531.4	49.2308
																																									2311.9	60.2521	1883.6	67.7315	1533.4	49.2702
																																									2315.2	60.3005	1885.1	67.7856	1534.4	49.3097
																																									2317.4	60.349	1890.4	67.8397	1535.1	49.3491
																																									2319.6	60.3975	1890.6	67.8939	1536.4	49.3886
																																									2328.5	60.446	1901.1	67.948	1540.5	49.428
																																									2335.9	60.4944	1904	68.0022	1542	49.4675
																																									2338.3	60.5429	1905.5	68.0563	1543.9	49.5069
																																									2339.7	60.5914	1906.5	68.1104	1544.1	49.5464
																																									2353.9	60.6398	1914.8	68.1646	1544.6	49.5858
																																									2359.8	60.6883	1921.8	68.2187	1546.8	49.6252
																																									2363.8	60.7368	1922.8	68.2729	1553.3	49.6647
																																									2365	60.7853	1931.5	68.327	1553.4	49.7041
																																									2365.1	60.8337	1932.9	68.3812	1555.1	49.7436
																																									2369.7	60.8822	1933	68.4353	1557.1	49.783
																																									2377.7	60.9307	1935.9	68.4894	1558.5	49.8225
																																									2378.7	60.9792	1936.6	68.5436	1558.6	49.8619
																																									2379	61.0276	1938.7	68.5977	1561.3	49.9014
																																									2386.8	61.0761	1939.7	68.6519	1561.4	49.9408
																																									2388.7	61.1246	1940.2	68.706	1565.1	49.9803
																																									2389.5	61.173	1941.1	68.7602	1565.6	50.0197
																																									2392.6	61.2215	1942.4	68.8143	1571.8	50.0592
																																									2393.9	61.27	1942.8	68.8684	1576.6	50.0986
																																									2395.3	61.3185	1950.3	68.9226	1578	50.1775
																																									2400.3	61.3669	1953.8	68.9767	1579.8	50.217
																																									2400.7	61.4154	1959.6	69.0309	1580.9	50.2564
																																									2401.6	61.4639	1960.8	69.085	1587.6	50.2959
																																									2405.4	61.5124	1967.2	69.1391	1591.1	50.3353
																																									2406.4	61.5608	1971.1	69.1933	1592.7	50.3748
																																									2416.4	61.6093	1973.2	69.2474	1593.1	50.4142
																																									2417.7	61.6578	1974.7	69.3016	1596.8	50.4536
																																									2418	61.7063	1979.6	69.3557	1597.5	50.4931
																																									2434.8	61.7547	1979.7	69.4099	1600.3	50.5325
																																									2438.9	61.8032	1981.6	69.464	1602.3	50.572
																																									2441	61.8517	1986.2	69.5181	1604.1	50.6114
																																									2447.5	61.9001	1986.6	69.5723	1606	50.6509
																																									2447.9	61.9486	1988.3	69.6264	1608.9	50.6903
																																									2456.9	61.9971	1988.9	69.6806	1611	50.7298
																																									2457.3	62.0456	1997.2	69.7347	1611.9	50.7692
																																									2460.8	62.094	1999.9	69.7888	1613.9	50.8087
																																									2461.9	62.1425	2004.3	69.843	1617.5	50.8481
																																									2465.7	62.191	2008.1	69.8971	1618.2	50.8876
																																									2466.5	62.2395	2010.3	69.9513	1619.3	50.927
																																									2467.3	62.2879	2017.6	70.0054	1619.4	50.9665
																																									2473	62.3364	2020.6	70.0596	1620.5	51.0059
																																									2475.3	62.3849	2028.7	70.1137	1621.7	51.0454
																																									2478	62.4333	2031.7	70.1678	1625.5	51.0848
																																									2480.5	62.4818	2038.9	70.222	1626.3	51.1243
																																									2482.8	62.5303	2043.8	70.2761	1626.7	51.1637
																																									2483.2	62.5788	2053.4	70.3303	1627.7	51.2032
																																									2491.4	62.6272	2059.5	70.3844	1629.2	51.2426
																																									2493.1	62.6757	2061.4	70.4385	1632.3	51.2821
																																									2494.5	62.7242	2061.8	70.4927	1633.6	51.3215
																																									2500.8	62.7727	2065.2	70.5468	1641.4	51.3609
																																									2512.7	62.8211	2066	70.601	1642.6	51.4004
																																									2514.1	62.8696	2073.5	70.6551	1644.4	51.4398
																																									2514.8	62.9181	2078.8	70.7093	1647.1	51.4793
																																									2518	62.9666	2084.9	70.7634	1648.5	51.5187
																																									2522.7	63.015	2085.4	70.8175	1652.9	51.5582
																																									2525.1	63.0635	2085.8	70.8717	1653.4	51.5976
																																									2530.7	63.112	2088.2	70.9258	1654.2	51.6371
																																									2531.1	63.1604	2092.4	70.98	1659.8	51.6765
																																									2534.4	63.2089	2092.5	71.0341	1666.1	51.716
																																									2536.3	63.2574	2097.3	71.0883	1668	51.7554
																																									2537	63.3059	2098.9	71.1424	1672.7	51.7949
																																									2551.2	63.3543	2099.1	71.1965	1674.6	51.8343
																																									2551.7	63.4028	2106.3	71.2507	1676.7	51.8738
																																									2552.8	63.4513	2114.4	71.3048	1678.8	51.9132
																																									2554	63.4998	2116.6	71.359	1682.4	51.9527
																																									2562.7	63.5482	2116.7	71.4131	1683.4	51.9921
																																									2563.4	63.5967	2117.1	71.4672	1688.2	52.0316
																																									2567.4	63.6452	2117.5	71.5214	1690	52.1105
																																									2567.5	63.6937	2124.7	71.5755	1690.9	52.1499
																																									2570.3	63.7421	2125.4	71.6297	1694	52.1893
																																									2576.5	63.7906	2126.3	71.6838	1698.5	52.2288
																																									2592.7	63.8391	2127.9	71.738	1702.3	52.2682
																																									2595.7	63.8875	2130.4	71.7921	1704.4	52.3077
																																									2596.8	63.936	2130.5	71.8462	1712	52.3471
																																									2609.2	63.9845	2134.7	71.9004	1715.5	52.3866
																																									2609.8	64.033	2135.3	71.9545	1717.5	52.426
																																									2615.7	64.0814	2143.1	72.0087	1718.3	52.4655
																																									2624.1	64.1299	2147.5	72.0628	1719.6	52.5049
																																									2624.4	64.1784	2150.3	72.1169	1720	52.5444
																																									2625.1	64.2269	2156.4	72.1711	1720.1	52.5838
																																									2625.4	64.2753	2157	72.2794	1721.9	52.6233
																																									2627.5	64.3238	2162.3	72.3335	1723.5	52.6627
																																									2628.2	64.3723	2164.9	72.3877	1724.4	52.7022
																																									2634	64.4207	2178.7	72.4418	1728.1	52.7416
																																									2640.5	64.4692	2184.9	72.4959	1736.6	52.7811
																																									2647.9	64.5177	2185.8	72.5501	1738.4	52.8205
																																									2650.2	64.5662	2196.9	72.6042	1739.7	52.86
																																									2657	64.6146	2207.3	72.6584	1743.6	52.8994
																																									2662.3	64.6631	2209.2	72.7125	1745.7	52.9389
																																									2665.1	64.7116	2210	72.7666	1748	52.9783
																																									2669.8	64.7601	2215.6	72.8208	1758.1	53.0178
																																									2670.4	64.8085	2224.4	72.8749	1758.3	53.0572
																																									2672.3	64.857	2225.6	72.9291	1760.8	53.0966
																																									2673.1	64.9055	2237.6	72.9832	1761	53.1361
																																									2682.2	64.954	2238.7	73.0374	1761.4	53.1755
																																									2682.5	65.0024	2239.7	73.0915	1764.5	53.2544
																																									2685.2	65.0509	2245.2	73.1456	1765.5	53.2939
																																									2687.1	65.0994	2246.6	73.1998	1766.2	53.3333
																																									2694.1	65.1478	2249.2	73.2539	1769.7	53.3728
																																									2703.7	65.1963	2256.1	73.3081	1772.5	53.4122
																																									2705.7	65.2448	2258.7	73.3622	1772.9	53.4517
																																									2707.7	65.2933	2262.6	73.4164	1774.2	53.4911
																																									2711.2	65.3417	2267.5	73.4705	1781.8	53.5306
																																									2714.2	65.3902	2268.1	73.5246	1784.3	53.57
																																									2714.3	65.4387	2270	73.5788	1786.3	53.6095
																																									2716.5	65.4872	2274	73.6329	1788.9	53.6489
																																									2718.9	65.5356	2281.8	73.6871	1796.1	53.6884
																																									2738.1	65.5841	2284	73.7412	1800.4	53.7278
																																									2748.3	65.6326	2290.1	73.7953	1802.5	53.7673
																																									2748.7	65.681	2297.4	73.8495	1807	53.8067
																																									2753	65.7295	2299.5	73.9036	1821	53.8462
																																									2753.4	65.8265	2300.9	73.9578	1821.3	53.8856
																																									2758.7	65.8749	2305.8	74.0119	1821.6	53.925
																																									2761.8	65.9234	2307.4	74.0661	1825.3	53.9645
																																									2767.6	65.9719	2318	74.1202	1827.2	54.0039
																																									2771.8	66.0204	2327.1	74.1743	1827.6	54.0434
																																									2772	66.0688	2329.2	74.2285	1829.8	54.0828
																																									2776.7	66.1173	2329.9	74.2826	1832	54.1223
																																									2781.8	66.1658	2336.6	74.3368	1836.6	54.1617
																																									2784.1	66.2143	2345.1	74.3909	1841.5	54.2012
																																									2794.7	66.2627	2353.4	74.445	1843	54.2406
																																									2811.3	66.3112	2357.9	74.4992	1846.1	54.2801
																																									2812.6	66.3597	2362.9	74.5533	1849.2	54.3195
																																									2813.5	66.4081	2373.1	74.6075	1854.4	54.359
																																									2816.1	66.4566	2379.9	74.6616	1855.3	54.3984
																																									2818.3	66.5051	2383.1	74.7158	1858.2	54.4379
																																									2824.6	66.5536	2392.4	74.7699	1860	54.4773
																																									2829.2	66.602	2393.4	74.824	1861.7	54.5168
																																									2829.6	66.6505	2400.5	74.8782	1863.4	54.5562
																																									2843.1	66.699	2402.2	74.9323	1864.7	54.5957
																																									2845.6	66.7475	2403	74.9865	1866.9	54.6351
																																									2849.4	66.7959	2413	75.0406	1872.2	54.6746
																																									2864.2	66.8444	2417.1	75.0947	1872.4	54.714
																																									2865.9	66.8929	2417.3	75.1489	1873.4	54.7535
																																									2867	66.9413	2435.5	75.203	1875.2	54.7929
																																									2868.1	66.9898	2452	75.2572	1878.8	54.8323
																																									2871.4	67.0383	2463.4	75.3113	1878.9	54.8718
																																									2872.2	67.0868	2467.9	75.3655	1880.5	54.9112
																																									2886.1	67.1352	2486.8	75.4196	1882	54.9507
																																									2889.5	67.1837	2489.1	75.4737	1882.3	54.9901
																																									2891.4	67.2322	2490.7	75.5279	1884.7	55.0296
																																									2894.3	67.2807	2493.7	75.582	1885.6	55.1085
																																									2896.8	67.3291	2494.3	75.6362	1889.8	55.1479
																																									2912.5	67.3776	2501.5	75.6903	1890.7	55.1874
																																									2915.4	67.4261	2505.8	75.7445	1892.4	55.2268
																																									2916.8	67.4746	2521.9	75.7986	1893.2	55.2663
																																									2918.1	67.523	2526.7	75.8527	1897.1	55.3057
																																									2918.3	67.5715	2535.9	75.9069	1898.4	55.3452
																																									2921.2	67.62	2537.1	75.961	1901.7	55.3846
																																									2925.5	67.6684	2538.8	76.0152	1902.4	55.4241
																																									2934.2	67.7169	2546	76.0693	1909	55.4635
																																									2934.8	67.7654	2546.1	76.1234	1910.3	55.503
																																									2935.8	67.8139	2547.8	76.1776	1910.9	55.5424
																																									2938.6	67.8623	2548.5	76.2317	1914.7	55.5819
																																									2939.5	67.9108	2550.3	76.2859	1917.1	55.6213
																																									2954.1	67.9593	2552.9	76.34	1918.5	55.6607
																																									2955.4	68.0078	2558	76.3942	1920.2	55.7002
																																									2963.8	68.0562	2558.5	76.4483	1921	55.7396
																																									2964	68.1047	2559.5	76.5024	1921.8	55.7791
																																									2969.6	68.1532	2570.5	76.5566	1924.4	55.8185
																																									2976.1	68.2016	2571.2	76.6107	1928.6	55.858
																																									2978.9	68.2501	2572.8	76.6649	1930.3	55.8974
																																									2979.2	68.2986	2580.5	76.719	1930.7	55.9369
																																									2988.3	68.3471	2585.3	76.7731	1932.4	55.9763
																																									2991.4	68.3955	2605.7	76.8273	1932.5	56.0158
																																									2993.1	68.444	2609.2	76.8814	1935.3	56.0552
																																									2998.7	68.4925	2622.8	76.9897	1937.8	56.0947
																																									2999	68.541	2638.1	77.0439	1940.7	56.1341
																																									3001.9	68.5894	2658.5	77.098	1945.4	56.1736
																																									3005.1	68.6379	2661.6	77.1521	1952	56.213
																																									3008.3	68.6864	2664.3	77.2063	1952.8	56.2525
																																									3013.7	68.7349	2669.1	77.2604	1953.6	56.2919
																																									3021.8	68.7833	2671.7	77.3146	1958.2	56.3314
																																									3028.2	68.8318	2672.2	77.3687	1960.2	56.3708
																																									3030.8	68.8803	2677.5	77.4228	1960.5	56.4103
																																									3031.3	68.9287	2679.2	77.477	1962.7	56.4497
																																									3032.8	68.9772	2684.2	77.5311	1966.4	56.4892
																																									3046.5	69.0257	2691.9	77.5853	1970.5	56.5286
																																									3062.9	69.0742	2693.8	77.6394	1974	56.6075
																																									3065.1	69.1226	2694	77.6936	1974.1	56.6469
																																									3067.2	69.1711	2712.9	77.7477	1975.5	56.6864
																																									3067.5	69.2196	2747.1	77.8018	1979.6	56.7258
																																									3069.3	69.3165	2759.4	77.856	1979.7	56.7653
																																									3072	69.365	2770.6	77.9101	1981	56.8047
																																									3081.1	69.4135	2776.2	77.9643	1985.4	56.8442
																																									3082.3	69.4619	2780.1	78.0184	1985.6	56.8836
																																									3088	69.5104	2782.9	78.0726	1988.8	56.9231
																																									3093.6	69.5589	2788.7	78.1267	1993.7	56.9625
																																									3094.2	69.6074	2802.4	78.1808	1993.9	57.002
																																									3099.9	69.6558	2818.5	78.235	1995.2	57.0414
																																									3100.2	69.7043	2820.1	78.2891	2001.8	57.0809
																																									3105	69.7528	2824.9	78.3433	2003.7	57.1203
																																									3111.4	69.8013	2831.1	78.3974	2003.8	57.1598
																																									3112	69.8497	2832.5	78.4515	2005.7	57.1992
																																									3116.5	69.8982	2838.2	78.5057	2011.3	57.2387
																																									3124.7	69.9467	2842.8	78.5598	2015.9	57.2781
																																									3130.1	69.9952	2844.7	78.614	2016	57.3176
																																									3130.7	70.0436	2854.3	78.6681	2016.8	57.357
																																									3131.6	70.0921	2862.5	78.7223	2017.2	57.3964
																																									3137	70.1406	2867.5	78.7764	2023	57.4359
																																									3143.4	70.189	2873.3	78.8305	2027.5	57.4753
																																									3144	70.2375	2875.7	78.8847	2035.2	57.5148
																																									3147.5	70.286	2883.1	78.9388	2036	57.5542
																																									3150.9	70.3345	2886.1	78.993	2036.4	57.5937
																																									3173.8	70.3829	2888.8	79.0471	2040	57.6331
																																									3177.3	70.4314	2891.5	79.1012	2040.3	57.6726
																																									3181.2	70.4799	2911.5	79.1554	2042.3	57.712
																																									3184.3	70.5284	2923.5	79.2095	2048.2	57.7515
																																									3187.7	70.5768	2939.1	79.2637	2050	57.7909
																																									3192.8	70.6253	2939.6	79.3178	2050.1	57.8304
																																									3197.1	70.7222	2954.1	79.372	2054.2	57.8698
																																									3200	70.7707	2973.6	79.4261	2056.6	57.9093
																																									3205	70.8192	2976.5	79.4802	2056.8	57.9487
																																									3215.4	70.8677	2980.3	79.5344	2060.5	57.9882
																																									3215.7	70.9161	2980.8	79.5885	2062.6	58.0276
																																									3219	70.9646	2984.8	79.6427	2063.5	58.0671
																																									3221.5	71.0131	2990.2	79.6968	2065.5	58.146
																																									3225	71.0616	2994	79.7509	2065.6	58.1854
																																									3230.4	71.11	3002.2	79.8051	2066	58.2249
																																									3239.2	71.1585	3005.2	79.8592	2067.2	58.2643
																																									3245.8	71.207	3007	79.9134	2067.6	58.3037
																																									3250.4	71.2555	3019.8	79.9675	2068.4	58.3432
																																									3253.4	71.3039	3022.9	80.0217	2068.5	58.3826
																																									3259.9	71.3524	3025.5	80.0758	2069.7	58.4221
																																									3261.7	71.4009	3025.9	80.1299	2071	58.4615
																																									3265.7	71.4493	3026.4	80.1841	2074.3	58.501
																																									3274.6	71.4978	3035.6	80.2382	2075.8	58.5404
																																									3294.4	71.5463	3040.4	80.2924	2078.2	58.5799
																																									3298	71.5948	3040.7	80.3465	2087	58.6193
																																									3299.1	71.6432	3045.3	80.4006	2088.1	58.6588
																																									3299.4	71.6917	3048	80.4548	2092.4	58.6982
																																									3301.9	71.7402	3058.6	80.5089	2093.8	58.7377
																																									3305.2	71.7887	3064.9	80.5631	2104	58.7771
																																									3308.2	71.8371	3068.1	80.6172	2111.2	58.8166
																																									3327.1	71.8856	3080.5	80.6714	2114.3	58.856
																																									3335.1	71.9341	3084.1	80.7255	2115	58.8955
																																									3340.4	71.9825	3084.2	80.7796	2115.1	58.9349
																																									3348.9	72.031	3097.2	80.8338	2115.2	58.9744
																																									3350.2	72.0795	3100.7	80.8879	2115.4	59.0138
																																									3352.5	72.128	3102	80.9421	2116.9	59.0533
																																									3371.8	72.1764	3125	80.9962	2122.6	59.0927
																																									3371.9	72.2249	3144	81.0504	2126.8	59.1321
																																									3378.8	72.2734	3151.4	81.1045	2130.2	59.1716
																																									3379.9	72.3219	3153.3	81.1586	2130.6	59.211
																																									3396.1	72.3703	3156.3	81.2128	2135.1	59.2505
																																									3400.3	72.4188	3167.9	81.2669	2142.6	59.2899
																																									3409	72.4673	3173.9	81.3211	2145.5	59.3294
																																									3410	72.5158	3181.7	81.3752	2146.6	59.3688
																																									3411.9	72.5642	3181.8	81.4293	2148.9	59.4083
																																									3417.5	72.6127	3183.8	81.4835	2149.8	59.4477
																																									3424.6	72.6612	3196.4	81.5376	2153.9	59.4872
																																									3428.6	72.7096	3203	81.5918	2158.5	59.5266
																																									3448.4	72.7581	3203.4	81.6459	2166.9	59.5661
																																									3456.5	72.8066	3207.9	81.7001	2167	59.6055
																																									3458.3	72.8551	3211.1	81.7542	2176.7	59.645
																																									3459.5	72.9035	3219	81.8083	2180.8	59.6844
																																									3460.3	72.952	3222.4	81.8625	2181.1	59.7239
																																									3477.4	73.0005	3230.2	81.9166	2184.6	59.7633
																																									3489.1	73.049	3233.9	81.9708	2184.7	59.8028
																																									3491.1	73.0974	3236.4	82.0249	2185.7	59.8422
																																									3491.9	73.1459	3238.5	82.079	2187.3	59.8817
																																									3494.2	73.1944	3254.4	82.1332	2187.7	59.9211
																																									3499.5	73.2429	3262.9	82.1873	2189.2	59.9606
																																									3511.1	73.2913	3277.9	82.2415	2194.6	60
																																									3515.4	73.3398	3292.1	82.2956	2199.8	60.0394
																																									3515.7	73.3883	3305.4	82.3498	2208.6	60.0789
																																									3520.7	73.4367	3315	82.4039	2209.9	60.1183
																																									3551	73.4852	3317.9	82.458	2214.1	60.1578
																																									3558.6	73.5337	3325.1	82.5122	2214.4	60.1972
																																									3563.4	73.5822	3347.1	82.5663	2223.9	60.2367
																																									3565.5	73.6306	3366.2	82.6205	2224.7	60.2761
																																									3567	73.6791	3373	82.6746	2234.8	60.355
																																									3569.9	73.7276	3379.8	82.7287	2239.5	60.3945
																																									3578	73.7761	3385.2	82.7829	2240.5	60.4339
																																									3590	73.8245	3399.2	82.837	2244.3	60.4734
																																									3590.5	73.873	3406.5	82.8912	2245.4	60.5128
																																									3606.6	73.9215	3406.8	82.9453	2248.5	60.5523
																																									3609.2	73.9699	3412	82.9995	2249.8	60.5917
																																									3610.4	74.0184	3439.1	83.0536	2251.5	60.6312
																																									3626.8	74.0669	3442	83.1077	2251.9	60.6706
																																									3637.7	74.1154	3445.2	83.1619	2257.7	60.7101
																																									3639.6	74.1638	3467.7	83.216	2261	60.7495
																																									3640	74.2123	3471.9	83.2702	2264.9	60.789
																																									3678.4	74.2608	3472.8	83.3243	2267.1	60.8284
																																									3680.4	74.3093	3477.3	83.3785	2269.3	60.8679
																																									3689.1	74.3577	3479.6	83.4326	2270.5	60.9073
																																									3696.7	74.4062	3479.7	83.4867	2272.1	60.9467
																																									3698.7	74.4547	3485.1	83.5409	2284.4	60.9862
																																									3700.5	74.5032	3487.4	83.595	2288.4	61.0256
																																									3700.8	74.5516	3493.3	83.6492	2289.4	61.0651
																																									3707.3	74.6001	3494.7	83.7033	2299.8	61.1045
																																									3717.3	74.6486	3514.1	83.7574	2300.1	61.144
																																									3720.9	74.697	3516	83.8116	2303.1	61.1834
																																									3732	74.7455	3526.9	83.8657	2307.3	61.2229
																																									3734.9	74.794	3540.9	83.9199	2313.6	61.2623
																																									3780.3	74.8425	3545.5	83.974	2316.8	61.3018
																																									3792.7	74.8909	3546.4	84.0282	2317.9	61.3412
																																									3794.5	74.9394	3555.1	84.0823	2320.6	61.3807
																																									3799.5	74.9879	3563	84.1364	2322.4	61.4201
																																									3802.7	75.0364	3568.4	84.1906	2322.6	61.4596
																																									3804	75.0848	3579.6	84.2447	2325.4	61.499
																																									3808.6	75.1333	3584.2	84.2989	2332.8	61.5385
																																									3815.4	75.1818	3587	84.353	2337.7	61.5779
																																									3818.8	75.2302	3607.7	84.4071	2338	61.6174
																																									3822	75.2787	3610	84.4613	2344.1	61.6568
																																									3830.7	75.3272	3612.3	84.5154	2344.2	61.6963
																																									3831.2	75.3757	3621.8	84.5696	2345.1	61.7357
																																									3834.6	75.4241	3628.6	84.6237	2348.1	61.7751
																																									3835.6	75.4726	3631.8	84.6779	2354.2	61.8146
																																									3844.7	75.5211	3633.3	84.732	2358.2	61.854
																																									3847	75.5696	3638.9	84.7861	2362.5	61.8935
																																									3847.4	75.618	3651.4	84.8403	2362.8	61.9329
																																									3848.3	75.6665	3652.9	84.8944	2364.8	61.9724
																																									3849.6	75.715	3654.8	84.9486	2366.5	62.0118
																																									3858.2	75.7635	3666.2	85.0027	2375.8	62.0513
																																									3860.1	75.8119	3673.6	85.0568	2380.8	62.0907
																																									3867.2	75.8604	3689.1	85.111	2382.6	62.1302
																																									3898.7	75.9089	3691	85.1651	2390	62.1696
																																									3901.6	75.9573	3720.5	85.2193	2397.4	62.2091
																																									3901.9	76.0058	3729.6	85.2734	2401.2	62.2485
																																									3903.2	76.1028	3733.1	85.3276	2404	62.288
																																									3909.3	76.1512	3738.5	85.3817	2410.1	62.3274
																																									3910.9	76.1997	3753.7	85.4358	2418.9	62.3669
																																									3923.2	76.2482	3756.9	85.49	2423.4	62.4063
																																									3937.5	76.2967	3763.4	85.5441	2425	62.4458
																																									3939	76.3451	3775.1	85.5983	2425.9	62.4852
																																									3943.4	76.3936	3784.7	85.6524	2429.2	62.5247
																																									3948.9	76.4421	3787	85.7066	2431.9	62.5641
																																									3953.2	76.4905	3802.1	85.7607	2432.8	62.6036
																																									3955.7	76.539	3814.3	85.8148	2432.9	62.643
																																									3958.3	76.5875	3815	85.869	2433.6	62.6824
																																									3962.9	76.636	3818.7	85.9231	2433.8	62.7219
																																									3994.5	76.6844	3830.1	85.9773	2434.5	62.7613
																																									3999.8	76.7329	3843.4	86.0314	2437.3	62.8008
																																									4012.1	76.7814	3855.5	86.0855	2445.4	62.8402
																																									4028.3	76.8299	3858.7	86.1397	2446.9	62.8797
																																									4029.4	76.8783	3864.5	86.1938	2450.4	62.9191
																																									4030.4	76.9268	3867.6	86.248	2453	62.9586
																																									4032.9	76.9753	3876.1	86.3021	2456.9	62.998
																																									4038.4	77.0238	3876.9	86.3563	2464.7	63.0375
																																									4042.5	77.0722	3879.7	86.4104	2470.3	63.0769
																																									4047.7	77.1207	3880.4	86.4645	2472.5	63.1164
																																									4048.2	77.1692	3885.8	86.5187	2477.1	63.1558
																																									4050.9	77.2176	3912.7	86.5728	2479.4	63.1953
																																									4062.4	77.2661	3914.5	86.627	2479.7	63.2347
																																									4093.8	77.3146	3940.4	86.6811	2481.7	63.2742
																																									4095.8	77.3631	3941.4	86.7352	2490.2	63.3136
																																									4097.7	77.4115	3959.7	86.7894	2493.6	63.3531
																																									4130.8	77.46	3961.1	86.8435	2495.4	63.3925
																																									4131.9	77.5085	3961.3	86.8977	2495.7	63.432
																																									4132.8	77.557	3963.1	86.9518	2499.5	63.4714
																																									4138	77.6054	3965.4	87.006	2502	63.5108
																																									4139.8	77.6539	4004.7	87.0601	2504.2	63.5503
																																									4146	77.7024	4005.3	87.1142	2506.9	63.5897
																																									4147	77.7508	4013.9	87.1684	2511.3	63.6292
																																									4157.1	77.7993	4018.6	87.2225	2513.6	63.6686
																																									4166.5	77.8478	4063.2	87.2767	2518.2	63.7081
																																									4175.4	77.8963	4096	87.3308	2522.5	63.7475
																																									4177	77.9447	4097.8	87.3849	2526.5	63.787
																																									4181.8	77.9932	4140.4	87.4391	2527.5	63.8264
																																									4183.9	78.0417	4157.4	87.4932	2530.3	63.8659
																																									4184.8	78.0902	4157.7	87.5474	2531.5	63.9053
																																									4191.3	78.1386	4174	87.6015	2532.6	63.9448
																																									4192.2	78.1871	4203.6	87.6557	2533.4	63.9842
																																									4199.6	78.2356	4263.5	87.7098	2537.2	64.0237
																																									4206.6	78.2841	4270.5	87.7639	2537.7	64.0631
																																									4213.7	78.3325	4295.2	87.8181	2545.1	64.1026
																																									4217.5	78.381	4306.9	87.8722	2549.8	64.142
																																									4218	78.4295	4312.9	87.9264	2552.8	64.1815
																																									4224.6	78.4779	4316.9	87.9805	2553.6	64.2209
																																									4233.7	78.5264	4338.9	88.0347	2555.6	64.2604
																																									4268.1	78.5749	4343.1	88.0888	2557	64.2998
																																									4273.1	78.6234	4361.6	88.1429	2562.6	64.3393
																																									4276.4	78.6718	4372.2	88.1971	2568.4	64.3787
																																									4278.1	78.7203	4397.8	88.2512	2571.8	64.4181
																																									4278.8	78.7688	4419.6	88.3054	2573.9	64.4576
																																									4280.4	78.8173	4420.2	88.3595	2577	64.497
																																									4281	78.8657	4437.3	88.4136	2577.7	64.5365
																																									4285	78.9142	4440.1	88.4678	2589.9	64.5759
																																									4286.4	78.9627	4457.7	88.5219	2597.3	64.6154
																																									4291.6	79.0111	4461.2	88.5761	2599	64.6548
																																									4292.2	79.0596	4480.2	88.6302	2599.4	64.6943
																																									4296.3	79.1081	4491.3	88.6844	2599.5	64.7337
																																									4304.7	79.1566	4493.1	88.7385	2599.8	64.7732
																																									4311.6	79.205	4507.3	88.7926	2600	64.8126
																																									4316.8	79.2535	4529.9	88.8468	2603.9	64.8521
																																									4320.8	79.302	4542.9	88.9009	2606.7	64.8915
																																									4326.6	79.3505	4574.8	88.9551	2609.1	64.931
																																									4330.1	79.3989	4576.2	89.0092	2609.7	64.9704
																																									4337	79.4474	4577.5	89.0633	2610.3	65.0099
																																									4341.3	79.4959	4587.2	89.1175	2614.4	65.0493
																																									4343.8	79.5928	4600.4	89.1716	2622.9	65.0888
																																									4360	79.6413	4604.4	89.2258	2627.6	65.1282
																																									4375	79.6898	4639.7	89.2799	2631	65.1677
																																									4378.3	79.7382	4642.4	89.3341	2631.6	65.2071
																																									4388	79.7867	4688.1	89.3882	2635.9	65.2465
																																									4406.7	79.8352	4694.2	89.4423	2649.2	65.286
																																									4425.8	79.8837	4696.3	89.4965	2654.2	65.3254
																																									4430.6	79.9321	4699.7	89.5506	2658.6	65.3649
																																									4433.4	79.9806	4716.3	89.6048	2659.3	65.4043
																																									4456.3	80.0291	4720.2	89.6589	2659.4	65.4438
																																									4478	80.0776	4731.9	89.713	2661.7	65.4832
																																									4493.7	80.126	4733.1	89.7672	2666.6	65.5227
																																									4510.2	80.1745	4737.5	89.8213	2667	65.5621
																																									4517.5	80.223	4742.8	89.8755	2706.4	65.6016
																																									4524	80.3199	4771.6	89.9296	2708.2	65.641
																																									4534.4	80.3684	4784.6	89.9838	2708.7	65.6805
																																									4545.9	80.4169	4794.2	90.0379	2708.9	65.7199
																																									4552.6	80.5138	4802.4	90.092	2712.1	65.7594
																																									4569.4	80.5623	4836.4	90.1462	2715.8	65.7988
																																									4572.8	80.6108	4863.3	90.2003	2718.2	65.8383
																																									4575	80.6592	4865.5	90.2545	2723.8	65.8777
																																									4581.3	80.7077	4886.8	90.3086	2733.6	65.9172
																																									4583.7	80.7562	4919.7	90.3628	2737.3	65.9566
																																									4591.5	80.8047	4974.7	90.4169	2738.7	65.9961
																																									4596.1	80.8531	4995.4	90.471	2743.3	66.0355
																																									4609.3	80.9016	5025.3	90.5252	2746.4	66.075
																																									4612.1	80.9501	5026.9	90.5793	2747.9	66.1144
																																									4613.4	80.9985	5051.2	90.6335	2752.1	66.1538
																																									4614.4	81.047	5053	90.6876	2752.7	66.1933
																																									4616.1	81.0955	5057.3	90.7417	2755.8	66.2327
																																									4621.9	81.144	5081.7	90.7959	2759.1	66.2722
																																									4626.5	81.1924	5093.3	90.85	2762.8	66.3116
																																									4639.3	81.2409	5099.3	90.9042	2763.1	66.3511
																																									4639.7	81.2894	5123.4	90.9583	2763.4	66.3905
																																									4643.6	81.3379	5134.3	91.0125	2768.4	66.43
																																									4653.3	81.3863	5148.6	91.0666	2769.6	66.4694
																																									4662	81.4348	5187.1	91.1207	2771.8	66.5089
																																									4665.4	81.4833	5247	91.1749	2778	66.5483
																																									4680	81.5317	5255.9	91.229	2778.9	66.5878
																																									4680.4	81.5802	5262.5	91.2832	2779.3	66.6272
																																									4684.6	81.6287	5265.4	91.3373	2781.5	66.6667
																																									4694.4	81.6772	5291.2	91.3914	2786.9	66.7061
																																									4699.1	81.7256	5316	91.4456	2787.8	66.7456
																																									4703.5	81.7741	5324.1	91.4997	2788.7	66.785
																																									4712.5	81.8226	5339.4	91.5539	2795.1	66.8245
																																									4739.9	81.8711	5345.2	91.608	2797.3	66.8639
																																									4740.2	81.9195	5346.4	91.6622	2803.2	66.9034
																																									4741.8	81.968	5347.1	91.7163	2803.3	66.9428
																																									4761.5	82.0165	5359.6	91.7704	2803.7	66.9822
																																									4766.2	82.065	5361	91.8246	2810.8	67.0217
																																									4766.5	82.1134	5379.3	91.8787	2820.4	67.0611
																																									4767.6	82.1619	5411.5	91.9329	2821.1	67.1006
																																									4782	82.2104	5413.7	91.987	2821.4	67.14
																																									4789.1	82.2588	5439.1	92.0411	2822.1	67.1795
																																									4793.1	82.3073	5449.8	92.0953	2822.5	67.2189
																																									4833.2	82.3558	5510.6	92.1494	2824	67.2584
																																									4839.4	82.4043	5525.2	92.2036	2829.2	67.2978
																																									4846.9	82.4527	5540.5	92.2577	2829.9	67.3373
																																									4858.8	82.5012	5547.9	92.3119	2830.5	67.3767
																																									4867.1	82.5497	5548.9	92.366	2844	67.4162
																																									4885.9	82.5982	5563.2	92.4201	2845.1	67.4556
																																									4890	82.6466	5609.7	92.4743	2848.8	67.4951
																																									4892	82.6951	5619.9	92.5284	2856.9	67.5345
																																									4893	82.7436	5650.2	92.5826	2861.2	67.574
																																									4912.2	82.7921	5701.8	92.6367	2863	67.6134
																																									4912.8	82.8405	5704.2	92.6909	2865	67.6529
																																									4914.5	82.889	5718.4	92.745	2869.9	67.6923
																																									4916	82.9375	5728.9	92.7991	2871.7	67.7318
																																									4942.2	82.9859	5758.9	92.8533	2874	67.7712
																																									4945	83.0344	5795.3	92.9074	2874.5	67.8107
																																									4949.6	83.0829	5804.5	92.9616	2876.9	67.8501
																																									4966.9	83.1314	5816.8	93.0157	2880.5	67.8895
																																									4970.8	83.1798	5817.6	93.0698	2883.4	67.929
																																									4979.5	83.2283	5831.8	93.124	2884.7	67.9684
																																									4980.4	83.2768	5850.9	93.1781	2890.8	68.0079
																																									5003.5	83.3253	5861.2	93.2323	2893.3	68.0473
																																									5008.9	83.3737	5919	93.2864	2905.9	68.0868
																																									5017.7	83.4222	5984.4	93.3406	2909.7	68.1262
																																									5023.8	83.4707	5993.7	93.3947	2912.2	68.1657
																																									5031.1	83.5191	6031.9	93.4488	2919.9	68.2051
																																									5044.1	83.5676	6104.8	93.503	2920.8	68.2446
																																									5046.5	83.6161	6119.6	93.5571	2924.1	68.284
																																									5049.1	83.6646	6128.6	93.6113	2924.3	68.3235
																																									5060.9	83.713	6169.1	93.6654	2924.8	68.3629
																																									5064.4	83.7615	6188.7	93.7195	2928.2	68.4024
																																									5083	83.81	6193.6	93.7737	2929.9	68.4418
																																									5087.7	83.8585	6233.6	93.8278	2938	68.4813
																																									5104.8	83.9069	6255.1	93.882	2940.5	68.5207
																																									5120.2	83.9554	6308.5	93.9361	2941.2	68.5602
																																									5152.8	84.0039	6312.9	93.9903	2942.5	68.5996
																																									5154	84.0524	6322.6	94.0444	2943.8	68.6391
																																									5170.4	84.1008	6382.2	94.0985	2944.9	68.6785
																																									5188.1	84.1493	6404.3	94.1527	2953.9	68.7179
																																									5190.9	84.1978	6481.9	94.2068	2954.6	68.7574
																																									5193.2	84.2462	6498.2	94.261	2954.9	68.7968
																																									5215.1	84.2947	6524.8	94.3151	2964	68.8363
																																									5235.5	84.3432	6535.2	94.3692	2965.6	68.8757
																																									5238.2	84.3917	6537.4	94.4234	2970.9	68.9152
																																									5246.1	84.4401	6570.5	94.4775	2971.1	68.9546
																																									5253.3	84.4886	6573	94.5317	2981.2	69.0335
																																									5264.7	84.5371	6591	94.5858	3004.6	69.073
																																									5281.8	84.5856	6596.6	94.64	3029.3	69.1124
																																									5287.6	84.634	6621.3	94.6941	3042	69.1519
																																									5292.7	84.6825	6637.3	94.7482	3046.9	69.1913
																																									5298.2	84.731	6719.2	94.8024	3050.3	69.2308
																																									5299.1	84.7794	6724.9	94.8565	3051.1	69.2702
																																									5306.8	84.8279	6730.6	94.9107	3054.1	69.3097
																																									5313.2	84.8764	6853.3	94.9648	3057.2	69.3491
																																									5314.2	84.9249	6898.7	95.0189	3058.1	69.3886
																																									5318.9	84.9733	6908.8	95.0731	3064.9	69.428
																																									5327	85.0218	6933.2	95.1272	3066.3	69.4675
																																									5340.8	85.0703	6966	95.1814	3068.6	69.5069
																																									5352.8	85.1188	6970.1	95.2355	3072.6	69.5464
																																									5410.2	85.1672	6996.2	95.2897	3074.5	69.5858
																																									5415.9	85.2157	7002.8	95.3438	3076	69.6252
																																									5419.9	85.2642	7031.9	95.3979	3079.6	69.6647
																																									5424.5	85.3127	7034.5	95.4521	3085.1	69.7041
																																									5425.1	85.3611	7040	95.5062	3091.2	69.7436
																																									5427.8	85.4096	7048.6	95.5604	3091.3	69.783
																																									5445	85.4581	7067.9	95.6145	3120.1	69.8225
																																									5445.1	85.5065	7078.7	95.6687	3121.3	69.8619
																																									5450.2	85.555	7227.1	95.7228	3121.8	69.9014
																																									5453.6	85.6035	7257.1	95.7769	3123.1	69.9408
																																									5471.5	85.652	7259.4	95.8311	3126.9	69.9803
																																									5486.9	85.7004	7273.7	95.8852	3127.4	70.0197
																																									5527.1	85.7489	7341.6	95.9394	3127.9	70.0592
																																									5528.8	85.7974	7347.3	95.9935	3130.2	70.0986
																																									5547	85.8459	7413.5	96.0476	3133.9	70.1381
																																									5592.9	85.8943	7418.8	96.1018	3143.7	70.1775
																																									5598.6	85.9428	7472.2	96.1559	3150.7	70.217
																																									5622.2	85.9913	7518.5	96.2101	3151.3	70.2564
																																									5638.5	86.0397	7548.4	96.2642	3164.9	70.2959
																																									5668.5	86.0882	7620.4	96.3184	3171.2	70.3353
																																									5673.5	86.1367	7648.1	96.3725	3174.2	70.3748
																																									5713.5	86.1852	7670.6	96.4266	3182.6	70.4142
																																									5745.3	86.2336	7703.3	96.4808	3187.9	70.4536
																																									5752.3	86.2821	7706.2	96.5349	3189.6	70.4931
																																									5780	86.3306	7749.3	96.5891	3191.5	70.5325
																																									5782.2	86.3791	7786.1	96.6432	3194.7	70.572
																																									5783.4	86.4275	7799.3	96.6973	3198.1	70.6114
																																									5801.8	86.476	7858.1	96.7515	3199.6	70.6509
																																									5882.8	86.5245	7978.6	96.8056	3202.7	70.6903
																																									5890.1	86.573	8001.4	96.8598	3204	70.7298
																																									5891.2	86.6214	8067.2	96.9139	3207.1	70.7692
																																									5894.7	86.6699	8119.6	96.9681	3207.8	70.8087
																																									5923.3	86.7184	8263.2	97.0222	3210.2	70.8481
																																									5937.9	86.7668	8325.2	97.0763	3213.8	70.8876
																																									5950.4	86.8153	8340.7	97.1305	3216.8	70.927
																																									5982.1	86.8638	8357.6	97.1846	3224.3	70.9665
																																									5994.4	86.9123	8430.8	97.2388	3225	71.0059
																																									5997.2	86.9607	8456.8	97.2929	3228.1	71.0454
																																									6002.1	87.0092	8549.1	97.347	3232.7	71.0848
																																									6017.2	87.0577	8726.1	97.4012	3235.6	71.1243
																																									6027.3	87.1062	8761.1	97.4553	3237.1	71.1637
																																									6052.3	87.1546	8781.6	97.5095	3240.8	71.2032
																																									6054.8	87.2031	8844.5	97.5636	3241.2	71.2426
																																									6114.6	87.2516	8960.7	97.6178	3244.7	71.2821
																																									6120.3	87.3	9013.4	97.6719	3246.6	71.3215
																																									6187.3	87.3485	9104.7	97.726	3256.1	71.3609
																																									6201.6	87.397	9112.7	97.7802	3260.6	71.4004
																																									6208	87.4455	9128.8	97.8343	3267.4	71.4398
																																									6215.7	87.4939	9193.3	97.8885	3268.4	71.4793
																																									6222.1	87.5424	9339.6	97.9426	3276.5	71.5187
																																									6240.2	87.5909	9586.4	97.9968	3281.9	71.5582
																																									6247.2	87.6394	9617.4	98.0509	3286.7	71.5976
																																									6272	87.6878	9983.3	98.105	3291.7	71.6371
																																									6304.8	87.7363	10083.5	98.1592	3297.4	71.6765
																																									6315.9	87.7848	10150.3	98.2133	3300.8	71.716
																																									6322.7	87.8333	10545.9	98.2675	3314	71.7554
																																									6343	87.8817	10754	98.3216	3319.1	71.7949
																																									6350.9	87.9302	10882.3	98.3757	3323	71.8343
																																									6355.5	87.9787	10931.3	98.4299	3326.7	71.8738
																																									6367.7	88.0271	11004.8	98.484	3330	71.9132
																																									6382.2	88.0756	11012.8	98.5382	3330.5	71.9527
																																									6386.1	88.1241	11217.1	98.5923	3331	71.9921
																																									6389	88.1726	11404.7	98.6465	3332.4	72.0316
																																									6392	88.221	11506.4	98.7006	3335.4	72.071
																																									6399.5	88.2695	11759.3	98.7547	3348.9	72.1105
																																									6412.5	88.318	11838.6	98.8089	3365	72.1499
																																									6484.9	88.3665	11935.3	98.863	3365.9	72.1893
																																									6496.6	88.4149	11967.1	98.9172	3373	72.2288
																																									6505.9	88.4634	12031.7	98.9713	3377.7	72.2682
																																									6524.8	88.5119	12490.2	99.0254	3380	72.3077
																																									6532.1	88.5603	13016.2	99.0796	3382.3	72.3471
																																									6535.4	88.6088	13627.5	99.1337	3384	72.3866
																																									6552.6	88.6573	15008.5	99.1879	3385	72.426
																																									6593.2	88.7058	15069.3	99.242	3404.6	72.4655
																																									6601.7	88.7542	15122.6	99.2962	3410	72.5049
																																									6618.9	88.8027	16113.7	99.3503	3419.8	72.5444
																																									6639.1	88.8512	16204	99.4044	3424.3	72.5838
																																									6655.3	88.8997	16402.5	99.4586	3428.1	72.6233
																																									6670.7	88.9481	16989.8	99.5127	3435.2	72.6627
																																									6705.3	88.9966	18284.5	99.5669	3436.2	72.7022
																																									6724.9	89.0451	18801.3	99.621	3443.7	72.7416
																																									6745.3	89.0936	19327.7	99.6751	3448.7	72.7811
																																									6748.2	89.142	21621.7	99.7293	3448.8	72.8205
																																									6752.2	89.1905	21893.2	99.7834	3455.2	72.86
																																									6842.1	89.239	23301.2	99.8376	3457.2	72.8994
																																									6846.4	89.2874	23851	99.8917	3458.9	72.9389
																																									6850.3	89.3359	29442.7	99.9459	3463.2	72.9783
																																									6856.4	89.3844	43986.1	100	3463.9	73.0178
																																									6893.6	89.4329			3466.7	73.0572
																																									6928	89.4813			3473	73.0966
																																									7007.4	89.5298			3492.9	73.1361
																																									7045.1	89.5783			3494.8	73.1755
																																									7059.6	89.6268			3499.9	73.215
																																									7086.6	89.6752			3512.2	73.2544
																																									7092.7	89.7237			3516.9	73.2939
																																									7099.1	89.7722			3523.1	73.3333
																																									7112	89.8206			3525.3	73.3728
																																									7114.8	89.8691			3526.1	73.4122
																																									7140.6	89.9176			3535.5	73.4517
																																									7158.6	89.9661			3542.8	73.4911
																																									7159.9	90.0145			3549	73.5306
																																									7192.6	90.063			3549.4	73.57
																																									7220.4	90.1115			3557.4	73.6095
																																									7222.5	90.16			3561.8	73.6489
																																									7269.6	90.2084			3565.2	73.6884
																																									7271.6	90.2569			3569.9	73.7278
																																									7289.4	90.3054			3573.4	73.7673
																																									7298.8	90.3539			3574.9	73.8067
																																									7338.7	90.4023			3579	73.8462
																																									7340.3	90.4508			3583.7	73.8856
																																									7341.4	90.4993			3599.7	73.925
																																									7345.6	90.5477			3612.2	73.9645
																																									7356.7	90.5962			3629.6	74.0039
																																									7379.2	90.6447			3633.4	74.0434
																																									7408.8	90.6932			3634.7	74.0828
																																									7444.9	90.7416			3639.7	74.1223
																																									7463.5	90.7901			3646	74.1617
																																									7466.9	90.8386			3657.9	74.2012
																																									7470.3	90.8871			3674.1	74.2406
																																									7487.3	90.9355			3682.3	74.2801
																																									7496.3	90.984			3686.5	74.3195
																																									7504.7	91.0325			3701.6	74.359
																																									7510	91.081			3718.2	74.3984
																																									7547.8	91.1294			3727.2	74.4379
																																									7592.6	91.1779			3738.9	74.4773
																																									7660.9	91.2264			3742.1	74.5168
																																									7672.5	91.2748			3749.7	74.5562
																																									7776.5	91.3233			3756.6	74.5957
																																									7784	91.3718			3768.5	74.6351
																																									7807.1	91.4203			3773	74.6746
																																									7821.7	91.4687			3775.9	74.714
																																									7827.2	91.5172			3783.8	74.8323
																																									7835.6	91.5657			3786.5	74.8718
																																									7939.5	91.6142			3789.8	74.9112
																																									7943.1	91.6626			3797.8	75.0296
																																									7953.8	91.7111			3800.4	75.069
																																									7969	91.7596			3803.5	75.1085
																																									7992	91.808			3805.4	75.1479
																																									8005.8	91.8565			3806.5	75.1874
																																									8019.1	91.905			3816.4	75.2268
																																									8044.4	91.9535			3830	75.2663
																																									8062.1	92.0019			3835.8	75.3057
																																									8165.8	92.0504			3836.2	75.3452
																																									8228.2	92.0989			3839.3	75.3846
																																									8237.8	92.1474			3839.9	75.4241
																																									8267.8	92.1958			3844.5	75.4635
																																									8344.3	92.2443			3845.9	75.503
																																									8352.9	92.2928			3848.7	75.5424
																																									8363.2	92.3413			3856.5	75.5819
																																									8485.7	92.3897			3877.7	75.6213
																																									8499.5	92.4382			3888	75.6607
																																									8513.6	92.4867			3891.9	75.7002
																																									8583.8	92.5351			3900.2	75.7396
																																									8603.1	92.5836			3909.2	75.7791
																																									8621.9	92.6321			3923.5	75.8185
																																									8636.4	92.6806			3927.7	75.858
																																									8675.1	92.729			3931.4	75.8974
																																									8685.9	92.7775			3937.3	75.9369
																																									8741.2	92.826			3944.9	75.9763
																																									8825	92.8745			3945.8	76.0158
																																									8852	92.9229			3960.2	76.0552
																																									8875.6	92.9714			3960.6	76.0947
																																									8894	93.0199			3963.6	76.1341
																																									8902.9	93.0683			3967.8	76.1736
																																									8950.6	93.1168			3976.8	76.213
																																									9068	93.1653			3979	76.2525
																																									9134.6	93.2138			3984	76.2919
																																									9240.6	93.2622			3985.2	76.3314
																																									9280.9	93.3107			3987.6	76.3708
																																									9335.6	93.3592			3995.1	76.4103
																																									9356.1	93.4077			4002.6	76.4497
																																									9377.2	93.4561			4003.7	76.4892
																																									9407.1	93.5046			4022.2	76.5286
																																									9439.3	93.5531			4032.3	76.568
																																									9541.9	93.6016			4046.7	76.6075
																																									9563.8	93.65			4059.7	76.6469
																																									9570.8	93.6985			4063	76.6864
																																									9578	93.747			4065.7	76.7258
																																									9644.2	93.7954			4097.2	76.7653
																																									9685.4	93.8439			4111.4	76.8047
																																									9696.1	93.8924			4117.3	76.8442
																																									9766.9	93.9409			4117.7	76.8836
																																									9793.8	93.9893			4118.2	76.9231
																																									9867.1	94.0378			4122.4	76.9625
																																									9929.8	94.0863			4124.6	77.002
																																									9964.1	94.1348			4125.7	77.0414
																																									9994.7	94.1832			4130.5	77.0809
																																									10004.1	94.2317			4131.4	77.1203
																																									10012.6	94.2802			4151.4	77.1598
																																									10017.2	94.3286			4152.2	77.1992
																																									10022.3	94.3771			4154.5	77.2387
																																									10109.2	94.4256			4156.2	77.2781
																																									10138.6	94.4741			4174.3	77.3176
																																									10187	94.5225			4178.8	77.357
																																									10227.3	94.571			4186.5	77.3964
																																									10268.3	94.6195			4191.8	77.4359
																																									10302.7	94.668			4194.9	77.4753
																																									10333.4	94.7164			4195.7	77.5148
																																									10408.9	94.7649			4198.2	77.5542
																																									10453.8	94.8134			4199.2	77.5937
																																									10489.9	94.8619			4202.3	77.6331
																																									10491.2	94.9103			4224	77.6726
																																									10534.1	94.9588			4225	77.712
																																									10590.8	95.0073			4231.5	77.7515
																																									10611.9	95.0557			4235.5	77.7909
																																									10671.4	95.1042			4236.8	77.8304
																																									10674	95.1527			4241.2	77.8698
																																									10900.6	95.2012			4243.6	77.9093
																																									10955.3	95.2496			4244.2	77.9487
																																									10988	95.2981			4264	77.9882
																																									11027.5	95.3466			4276	78.0276
																																									11085.3	95.3951			4276.2	78.0671
																																									11143.5	95.4435			4281.9	78.1065
																																									11189.3	95.492			4289.1	78.146
																																									11190.6	95.5405			4295.5	78.1854
																																									11193.7	95.5889			4304.1	78.2249
																																									11201.1	95.6374			4307	78.2643
																																									11279.2	95.6859			4309.6	78.3037
																																									11462.3	95.7344			4321.7	78.3432
																																									11496.6	95.7828			4330.5	78.3826
																																									11560.1	95.8313			4340.4	78.4221
																																									11569.1	95.8798			4363.4	78.4615
																																									11597.6	95.9283			4363.9	78.501
																																									11620.2	95.9767			4365.5	78.5404
																																									11642.9	96.0252			4389.7	78.5799
																																									11787.7	96.0737			4393.2	78.6193
																																									12131.5	96.1222			4403.4	78.6588
																																									12188.2	96.1706			4405	78.6982
																																									12319.4	96.2191			4408.7	78.7377
																																									12324.8	96.2676			4412.5	78.7771
																																									12336.2	96.316			4416.5	78.8166
																																									12340.2	96.3645			4421.5	78.856
																																									12384.3	96.413			4428.8	78.8955
																																									12640.1	96.4615			4440.9	78.9349
																																									12689.5	96.5099			4441.3	78.9744
																																									12766.3	96.5584			4458	79.0138
																																									12919.8	96.6069			4473.4	79.0533
																																									12986.8	96.6554			4504.4	79.0927
																																									13135	96.7038			4504.7	79.1321
																																									13152.8	96.7523			4513.7	79.1716
																																									13158.5	96.8008			4528.2	79.211
																																									13279.6	96.8492			4550.5	79.2505
																																									13288.3	96.8977			4561.3	79.2899
																																									13338.9	96.9462			4565.2	79.3294
																																									13353.1	96.9947			4571.5	79.3688
																																									13395.7	97.0431			4573.7	79.4083
																																									13470.1	97.0916			4583.6	79.4477
																																									13535.1	97.1401			4591.2	79.4872
																																									13560.5	97.1886			4596.9	79.5266
																																									13621.5	97.237			4600	79.5661
																																									13626.2	97.2855			4627.9	79.6055
																																									13774.9	97.334			4629.6	79.645
																																									13889.6	97.3825			4632.9	79.6844
																																									13906	97.4309			4633	79.7239
																																									13910.4	97.4794			4633.1	79.7633
																																									13987.6	97.5279			4642.5	79.8028
																																									14112.7	97.5763			4648.6	79.8422
																																									14268.7	97.6248			4663	79.8817
																																									14357.5	97.6733			4667.5	79.9211
																																									14539.3	97.7218			4676.8	79.9606
																																									14658.8	97.7702			4678.6	80
																																									14679.1	97.8187			4683.5	80.0394
																																									14737.2	97.8672			4692.2	80.0789
																																									14927.9	97.9157			4692.7	80.1183
																																									15042.7	97.9641			4698.4	80.1578
																																									15074.8	98.0126			4706.2	80.1972
																																									15223.4	98.0611			4711.2	80.2367
																																									15414.2	98.1095			4712.2	80.2761
																																									15518.9	98.158			4720.7	80.3156
																																									15937.5	98.2065			4725.1	80.355
																																									16195.7	98.255			4729.5	80.3945
																																									16237.2	98.3034			4756.2	80.4339
																																									16258.8	98.3519			4758.3	80.4734
																																									16366.6	98.4004			4761.7	80.5128
																																									16497.3	98.4489			4776.5	80.5523
																																									16898.1	98.4973			4777.5	80.5917
																																									16964.6	98.5458			4787	80.6312
																																									17024.8	98.5943			4789.1	80.6706
																																									17124.5	98.6428			4798.3	80.7101
																																									17618.6	98.6912			4807	80.7495
																																									18088.5	98.7397			4820.6	80.789
																																									18222.7	98.7882			4821	80.8284
																																									18494.1	98.8366			4826.4	80.8679
																																									18529.1	98.8851			4848	80.9073
																																									18847	98.9336			4856.9	80.9467
																																									18939.7	98.9821			4869.4	80.9862
																																									19069.1	99.0305			4870.1	81.0256
																																									19110.8	99.079			4874.8	81.0651
																																									19248.3	99.1275			4877.4	81.1045
																																									19450.9	99.176			4881.8	81.144
																																									19454.4	99.2244			4895.7	81.1834
[truncated: 476 more rows]
[truncated: 11 more columns]

## Sheet: Sheet3
	KO													OE KIF2C(WT)								OE KIF2C(G491A)
	99.8811	92.5969	101.75	99.9977	100.828	103.009	96.8447	104.674	100.828	100.045	3.53716	1.25057		100.311	101.387	92.7731	92.9927	91.8777	95.8682	4.58151	2.29075		111.443	104.734	106.664	96.5735	99.9013	103.863	5.80727	2.90364
	101.917	92.4919	100.697	98.732	88.9185	99.5925	91.3463	99.4715	88.9185	95.7872	5.28367	1.86806		89.5295	100.022	98.8092	99.5386	87.6017	95.1003	6.01965	3.00983		98.715	106.344	104.722	100.318	99.8941	101.999	3.3295	1.66475
	100.34	101.981	95.1771	108.228	103.745	105.044	94.3518	100.796	103.745	101.49	4.48683	1.58633		98.7138	97.6326	97.5241	98.3237	95.8525	97.6094	1.09821	0.549103		94.9473	99.9881	100.404	95.9412	95.5594	97.368	2.61004	1.30502
	99.4022	97.4193	101.096	100.576	97.5112	104.161	105.389	106.963	97.5112	101.114	3.61582	1.27839		97.6541	100.42	93.4973	94.2686	91.1284	95.3936	3.65462	1.82731		96.5781	97.2379	97.7116	97.2058	98.2199	97.3907	0.614099	0.307049
	100.293	105.783	98.8428	96.5466	99.6269	107.188	101.973	103.878	99.6269	101.529	3.4756	1.22881		89.259	95.8098	98.2846	94.8494	89.1748	93.4755	4.08471	2.04236		102.176	99.3602	96.2762	97.5021	98.3732	98.7376	2.23215	1.11608
	102.922	103.402	95.1365	95.8641	96.449	100.415	98.6019	97.2774	96.449	98.5019	3.07062	1.08563		91.5586	100.875	95.9554	104.027	96.2299	97.7291	4.82248	2.41124		96.2209	96.7874	96.2117	100.792	102.715	98.5453	3.01537	1.50768
	99.1973	109.481	94.8825	96.1219	91.789	121.509	98.3667	103.96	91.789	100.789	9.63067	3.40496		99.5095	105.375	99.5775	105.234	97.7312	101.485	3.56437	1.78219		96.5261	96.4453	92.0795	100.875	104.492	98.0836	4.74383	2.37191
	100.611	110.141	90.5642	94.1335	105.069	107.463	96.1938	95.0734	105.069	100.48	6.80478	2.40585		91.0271	103.668	98.8261	95.6275	89.8503	95.7999	5.68508	2.84254		96.2715	97.5336	87.3854	95.4325	94.4737	94.2193	3.9823	1.99115
	99.5403	94.4827	93.4322	100.613	102.557	113.63	103.036	103.162	102.557	101.446	5.84614	2.06692		102.161	102.587	107.596	98.1169	91.2066	100.334	6.11103	3.05551		100.293	98.8376	92.8939	99.0894	104.149	99.0524	4.04611	2.02305
	102.372	97.0482	104.504	92.7025	114.254	103.009	106.602	100.359	114.254	103.9	7.15936	2.53122		92.0883	99.9108	102.988	99.263	96.0802	98.066	4.14539	2.0727		93.5245	98.7889	93.0205	96.1053	101.875	96.6629	3.712	1.856
	99.2893	101.038	103.376	100.551	92.2351	101.513	103.128	102.735	92.2351	99.5668	4.3552	1.5398		95.6222	101.73	102.394	97.3359	96.978	98.8122	3.04417	1.52209		98.1559	97.521	94.3961	101.886	100.636	98.519	2.91312	1.45656
	107.17	101.887	111.745	105.723	92.4887	115.068	104.148	99.9148	92.4887	103.404	7.73383	2.73432		97.5674	103.041	102.192	101.963	101.922	101.337	2.15525	1.07763		100.753	93.0068	96.4612	102.436	98.8176	98.295	3.70107	1.85053
	103.012	100.568	113.957	101.786	101.574	92.102	103.915	93.932	101.574	101.38	6.22224	2.1999		93.4967	102.414	105.251	100.962	99.3007	100.285	4.37905	2.18952		99.4292	84.1985	101.592	102.976	97.5838	97.1558	7.52986	3.76493
	102.234	101.04	115.738	91.365	105.429	107.185	102.58	97.0165	105.429	103.113	6.77524	2.39541		93.1463	97.4014	98.4948	103.956	110.482	100.696	6.69128	3.34564		104.418	87.9151	100.781	104.587	98.7174	99.2836	6.82439	3.4122
	100.409	103.12	104.216	92.4107	93.0063	101.412	106.274	92.4294	93.0063	98.476	5.71035	2.01892		94.0329	97.7458	98.7671	106.661	100.056	99.4526	4.61213	2.30606		101.464	90.2623	100.905	103.868	103.207	99.9412	5.54553	2.77277
	105.088	105.878	99.831	94.3302	95.6712	94.406	100.499	97.2734	95.6712	98.7387	4.39821	1.555		92.0025	98.8825	87.4976	103.592	95.7834	95.5516	6.18995	3.09497		105.947	94.733	98.4646	101.972	99.8059	100.184	4.15996	2.07998
	102.458	93.7318	102.154	96.417	99.0872	95.2357	104.563	105.026	99.0872	99.7512	4.07289	1.43998		110.469	102.357	93.9821	104.169	98.554	101.906	6.17821	3.0891		101.416	99.4088	100.154	108.743	101.428	102.23	3.74166	1.87083
	96.4368	99.0423	98.3337	97.293	101.159	93.7001	107.795	100.083	101.159	99.4447	3.9385	1.39247		95.087	98.5412	100.102	109.514	103.502	101.349	5.47615	2.73808		100.648	98.6157	101.531	109.68	102.616	102.618	4.21169	2.10585
	79.8304	98.7535	103.498	103.508	109.337	94.6311	102.209	99.2058	109.337	100.034	8.9554	3.16621		101.015	101.446	99.3774	109.442	97.3547	101.727	4.60278	2.30139		101.209	102.34	98.6514	109.768	101.431	102.68	4.19258	2.09629
	84.7378	88.7025	93.8358	97.5196	102.996	106.751	106.091	94.9799	102.996	97.6233	7.74364	2.73779		106.402	98.4858	101.752	108.294	109.873	104.961	4.73129	2.36564		102.636	99.4173	100.467	102.601	101.629	101.35	1.39747	0.698736
	101.225	96.1943	98.046	96.4484	98.7537	94.2535	105.578	102.824	98.7537	99.1196	3.54715	1.25411		96.8664	99.7407	104.978	103.53	112.731	103.569	6.03152	3.01576		102.384	107.661	96.4002	100.201	105.817	102.493	4.47606	2.23803
	99.8568	97.0464	94.8161	103.083	102.69	89.3462	96.7978	110.743	102.69	99.6744	6.1014	2.15717		108.086	101.788	99.384	104.807	116.33	106.079	6.59481	3.2974		102.787	108.922	97.0883	92.0195	102.274	100.618	6.37944	3.18972
	99.9677	92.3035	97.5212	102.238	101.258	95.9597	88.4013	98.7754	101.258	97.5204	4.61756	1.63255		104.813	102.983	94.0278	101.257	115.876	103.791	7.89776	3.94888		103.704	103.37	106.538	96.701	99.9563	102.054	3.79537	1.89769
	100.544	103.024	88.8502	107.903	98.386	92.8204	89.1317	104.142	98.386	98.132	6.67874	2.36129		98.2728	102.702	103.036	104.031	113.254	104.259	5.49374	2.74687		104.057	105.825	110.858	94.5956	101.278	103.323	5.99826	2.99913
	104.675	96.194	89.412	106.573	98.8813	96.5053	86.1261	104.929	98.8813	98.0196	6.96274	2.4617		101.716	100.251	106.9	92.4945	100.653	100.403	5.16161	2.58081		105.792	106.489	106.412	98.3874	109.127	105.242	4.04072	2.02036
	101.068	107.482	89.7239	103.741	98.2068	93.2029	95.041	104.577	98.2068	99.0277	5.77028	2.0401		107.816	97.9732	103.479	91.8546	97.8705	99.7986	6.08228	3.04114		102.43	106.951	107.977	97.5003	107.301	104.432	4.44966	2.22483
	103.393	107.773	108	102.701	103.873	99.2636	100.634	101.149	103.873	103.407	2.98015	1.05364		114.796	93.814	104.931	100.754	98.9324	102.646	7.87754	3.93877		95.9125		104.35	99.5671	106.566	101.599	4.78539	2.39269
	101.368	107.488	107.558	100.318	101.263	102.895	100.682	90.1405	101.263	101.442	5.07084	1.79281		114.802	98.4296	102.509	89.8598	95.6993	100.26	9.33881	4.6694		93.6257		105.036	99.5262	104.882	100.768	5.4068	2.7034
	99.9027	98.4692		101.818	95.2062	80.4821	101.754	89.7883	95.2062	95.3283	7.22418	2.55413		113.829	99.5094	104.651	91.9264	100.198	102.023	8.0294	4.0147		93.7259		102.347	98.3453	105.625	100.011	5.13969	2.56984
		95.4378		103.351	107.114	88.2476	100.55	94.7211	107.114	99.505	7.04535	2.49091		108.35	93.0767	100.462	91.3551	107.916	100.232	7.98422	3.99211		92.8113		102.22	94.8033	104.039	98.4684	5.49378	2.74689
	165.12	140.596	205.232	196.993	197.991	198.886	136.245	168.767	197.991	178.647	26.7576	9.46022		167.388	209.899	147.323	167.959	247.856	188.085	40.4456	20.2228		131.285	127.199	136.99	205.879	130.463	146.363	33.4568	16.7284
	156.326	119.825	172.988	171.861	184.474	170.801	127.383	161.192	184.474	161.036	23.2034	8.20363		141.49	184.156	139.945	130.939	176.841	154.674	24.0555	12.0278		123.62	158.688	129.451	197.08	138.051	149.378	29.7951	14.8975
	142.418	125.606	166.192	156.238	169.875	157.741	120.581	148.339	169.875	150.763	18.2573	6.45494		143.166	161.883	135.502	132.934	141.074	142.912	11.3776	5.68878		124.976	141.395	124.051	177.473	128.155	139.21	22.4912	11.2456
	140.499	113.456	154.685	151.964	166.565	140.898	120.459	151.245	166.565	145.148	18.5256	6.5498		155.451	160.288	138.347	130.3	138.972	144.672	12.6401	6.32007		121.967	141.027	114.373	176.537	126.542	136.089	24.6098	12.3049
	139.168	118.68	137.403	141.569	148.215	141.77	126.893	144.898	148.215	138.535	9.86777	3.48878		145.821	157.213	132.853	129.586	138.229	140.74	11.0691	5.53456		112.122	135.501	112.709	161.793	114.781	127.381	21.5465	10.7733
	128.991	128.162	139.111	126.551	141.404	145.908	122.954	140.859	141.404	135.038	8.30345	2.93571		146.971	151.742	134.608	120.328	144.665	139.663	12.4874	6.24371		115.251	128.207	112.486	155.893	116.913	125.75	17.8806	8.94031
	131.923	114.983	130.761	119.749	142.903	127.471	131.32	139.796	142.903	131.312	9.72424	3.43804		151.483	146.906	127.854	127.164	138.508	138.383	10.966	5.48301		111.856	127.513	109.664	151.335	121.43	124.359	16.7224	8.36118
	124.464	123.332	130.03	113.507	125.203	127.233	131.695	133.37	125.203	126.004	5.82384	2.05904		136.989	146.447	129.241	124.673	129.064	133.283	8.5922	4.2961		111.238	132.177	111.005	144.8	118.451	123.534	14.671	7.33548
	127.766	134.899	126.982	115.199	133.251	126.737	131.569	141.562	133.251	130.135	7.28812	2.57674		136.987	145.593	127.015	117.695	127.718	131.001	10.6356	5.3178		111.032	132.781	113.757	140.163	110.607	121.668	13.8168	6.90839
	121	126.459	119.61	115.027	126.342	123.162	132.69	144.909	126.342	126.171	8.63708	3.05367		133.536	145.706	123.192	118.405	124.781	129.124	10.7631	5.38153		114.272	129.934	114.739	132.699	119.04	122.137	8.63904	4.31952
	126.382	119.151	115.326	108.503	129.341	124.978	115.718	134.161	129.341	122.545	8.33185	2.94575		136.365	138.869	131.119	119.977	122.535	129.773	8.31208	4.15604		110.327	127.113	108.718	128.362	122.793	119.463	9.324	4.662
	116.845	123.231	114.605	103.556	124.399	127.343	115.406	140.674	124.399	121.162	10.301	3.64197		132.12	135.281	130.208	124.317	125.608	129.507	4.54978	2.27489		112.501	127.009	104.444	126.626	119.626	118.041	9.6462	4.8231
	121.052	117.548	116.046	109.289	121.733	124.698	111.788	122.715	121.733	118.511	5.2491	1.85584		134.773	139.1	136.261	117.623	116.907	128.933	10.7673	5.38365		111.386	130.419	107.522	134.763	113.162	119.451	12.2644	6.13222
	120.364	109.573	114.136	116.885	125.693	112.201	110.788	122.984	125.693	117.591	6.32561	2.23644		136.362	138.474	130.633	110.647	125.076	128.238	11.135	5.56751		110.826	135.332	113.361	124.226	123.309	121.411	9.77474	4.88737
	118.709	108.15	102.469	109.294	129.915	122.002	108.791	118.659	129.915	116.434	9.85918	3.48575		134.95	135.738	133.206	117.978	118.931	128.161	8.91422	4.45711		112.679	132.321	115.094	129.287	103.618	118.6	11.982	5.99102
	116.841	107.772	112.973	105.024	122.588	119.689	110.103	117.521	122.588	115.011	6.39061	2.25942		134.505	135.279	136.121	115.063	123.358	128.865	9.30639	4.6532		108.524	134.629	119.699	127.44	111.034	120.265	10.9681	5.48405
	116.579	109.671	106.541	98.9513	119.143	114.682	114.656	125.802	119.143	113.908	7.9097	2.7965		129.473	134.995	129.034	104.739	125.005	124.649	11.6841	5.84207		104.697	134.799	121.513	124.481	122.53	121.604	10.8293	5.41464
	118.284	110.044	103.493	96.1976	116.788	107.575	110.663	125.72	116.788	111.728	8.80483	3.11298		121.872	133.918	130.07	117.197	128.008	126.213	6.66349	3.33175		106.287	131.783	117.276	125.873	122.109	120.666	9.63084	4.81542
	117.005	129.876	100.224	90.1223	115.189	117.65	101.8	132.844	115.189	113.322	13.8606	4.90047		126.287	140.866	122.151	110.151	124.491	124.789	10.9776	5.48882		109.819	134.206	118.143	126.507	115.547	120.844	9.58551	4.79275
	102.894	116.183	102.002	94.7324	120.361	101.961	114.844	126.762	120.361	111.122	10.9443	3.8694		131.5	140.806	126.736	114.279	132.586	129.181	9.74865	4.87433		100.245	132.712	114.085	121.489	122.534	118.213	12.0364	6.01819
	103.891	114.582	100.696	95.4045	117.512	111.426	120.96	119.109	117.512	111.233	9.09825	3.21672		123.194	142.745	124.933	119.76	123.665	126.859	9.08432	4.54216		105.754	131.721	113.757	131.393	104.9	117.505	13.2852	6.64258
	100.009	116.57	94.1166	94.9042	120.978	108.016	119.715	120.603	120.978	110.654	11.571	4.09095		124.965	137.96	126.32	115.206	133.113	127.513	8.65854	4.32927		104.135	124.53	115.642	121.82	109.754	115.176	8.41345	4.20673
	103.579	113.688	89.797	97.7725	123.205	117.048	110.533	119.904	123.205	110.97	11.7306	4.14738		127.35	135.452	123.61	115.989	127.871	126.055	7.08151	3.54076		107.345	127.381	115.606	129.242	118.617	119.638	8.95267	4.47634
	102.298	116.574	93.4296	99.4551	114.849	117.327	110.413	113.903	114.849	109.233	8.65395	3.05963		132.474	143.483	128.877	116.339	135.662	131.367	9.98113	4.99057		102.31	126.285	117.056	124.225	117.25	117.425	9.39931	4.69966
	105.069	130.732	95.0681	100.916	118.26	108.895	107.047	113.474	118.26	110.858	10.6739	3.7738		129.295	143.312	133.128	118.48	135.592	131.961	9.11354	4.55677		101.243	125.383	111.365	126.758	119.469	116.843	10.6245	5.31227
	108.211	103.891	97.8928	98.295	114.644	108.235	109.666	115.499	114.644	107.886	6.7128	2.37333		122.932	136.82	132.369	104.524	137.25	126.779	13.7095	6.85476		95.4391	125.421	110.242	123.089	117.165	114.271	12.0554	6.02769
	106.294	85.2849	99.2776	90.3876	114.437	100.416	114.969	118.762	114.437	104.918	11.8557	4.19164		126.38	138.132	129.798	105.597	127.641	125.51	12.0369	6.01846		97.4444	124.224	115.064	122.326	109.242	113.66	10.853	5.42651
	107.415	83.9607	97.7911	96.9148	116.787	111.261	100.491	118.051	116.787	105.495	11.5723	4.09143		134.949	140.978	131.997	110.213	141.96	132.019	12.8761	6.43805		102.485	124.76	115.353	123.007	107.964	114.714	9.55537	4.77769
	103.469	91.2656	103.563	84.45	121.914	102.126	102.8	109.514	121.914	104.557	12.3451	4.36464		124.431	143.594	130.908	102.668	134.616	127.244	15.3864	7.69321		106.639	126.017	113.614	123.841	102.339	114.49	10.3727	5.18634
	103.368	94.3061	107.123	91.1359	126.701	96.8914	110.101	92.1714	126.701	105.389	13.7413	4.85828		133.629	136.478	131.257	119.9	137.1	131.673	6.98481	3.49241		107.198	129.664	109.41	124.95	119.385	118.121	9.7038	4.8519
	104.535	94.3005	105.239	95.3976	117.001	106.692	114.716	73.7792	117.001	103.185	13.8625	4.90112		130.446	133.686	125.275	114.282	138.897	128.517	9.37173	4.68587		99.7716	128.374	111.221	114.62	108.813	112.56	10.4127	5.20634
	102.672	95.9156	118.415	90.9818	124.97	94.5192	111.973	83.0092	124.97	105.27	15.425	5.45356		131.413	134.77	127.019	118.977	149.766	132.389	11.372	5.686		108.027	128.039	109.448	118.404	122.537	117.291	8.53847	4.26923
	98.6771	97.9965	116.311	89.4805	126.394	99.5972	111.918	76.0473	126.394	104.757	16.9115	5.97913		134.509	135.739	134.458	115.346	132.147	130.44	8.53716	4.26858		101.506	127.013	108.975	120.181	116.907	114.917	9.91384	4.95692
	120.257	95.5343	117.016	96.1526	122.331	105.473	113.089	77.4734	122.331	107.74	15.4174	5.45086		135.479	132.84	126.665	114.068	139.874	129.785	10.0036	5.00182		105.428	128.999	109.047	118.579	123.125	117.035	9.76148	4.88074
	137.413	103.689	112.114	88.3729	123.026	93.6398	111.913	87.9409	123.026	109.015	17.1467	6.06226		133.712	132.548	126.114	108.582	139.65	128.121	11.9331	5.96655		102.041	132.047	112.056	121.11	107.108	114.872	11.9032	5.9516
	134.424	92.1185	113.162	80.9313	127.017	91.1054	113.535	92.1745	127.017	107.943	19.3635	6.84603		126.825	132.663	131.882	119.192	128.855	127.883	5.39513	2.69757		103.749	123.602	109.953	122.161	114.357	114.764	8.3287	4.16435
	127.502	90.1285	129.524	96.2879	121.866	84.7753	121.585	95.2543	121.866	109.865	17.8178	6.29953		130.709	129.3	137.375	115.206	151.423	132.802	13.1715	6.58574		105.755	131.983	115.967	123.09	124.318	120.223	9.88315	4.94158
	123.553	81.962	116.132	96.4179	127.067	95.0226	110.976	96.8386	127.067	108.337	16.3862	5.7934		140.511	135.394	140.638	109.796	146.849	134.637	14.4682	7.2341		104.517	130.659	113.646	120.847	114.954	116.925	9.65133	4.82566
	114.182	98.2597	126.37	94.1729	122.487	92.6447	112.909	100.624	122.487	109.348	13.131	4.6425		130.883	132.72	144.393	108.511	145.712	132.444	14.9509	7.47543		112.826	129.642	111.946	115.969	115.234	117.123	7.19161	3.5958
	111.57	99.0245	112.11	86.3638	116.791	102.939	110.353	92.6103	116.791	105.395	10.8387	3.83206		132.391	124.972	142.799	103.743	145.206	129.822	16.6981	8.34904		113.683	133.343	111.079	118.073	127.733	120.782	9.4603	4.73015
	107.789	86.3321	130.356	91.6445	122.383	90.7777	112.23	92.0849	122.383	106.22	16.5449	5.84949		123.196	125.257	139.808	108.871	142.048	127.836	13.5383	6.76917		111.741	132.914	118.686	109.895	115.715	117.79	9.12081	4.56041
	105.445	83.6728	133.992	93.332	122.947	82.1286	104.613	103.343	122.947	105.824	18.0131	6.36858		126.112	119.504	141.756	119.225	137.251	128.77	10.3027	5.15137		111.236	135.124	111.184	108.927	103.444	113.983	12.2368	6.11839
	107.416	82.4394	127.821	93.4967	119.28	87.6949	102.55	101.499	119.28	104.609	15.379	5.43731		125.672	115.396	141.889	112.141	139.651	126.95	13.5919	6.79593		114.539	144.81	113.539	118.077	108.732	119.939	14.2985	7.14923
	112.366	89.3604	130.937	95.5771	115.317	92.15	110.858	107.314	115.317	107.688	13.29	4.69871		127.084	118.595	146.136	118.979	143.7	130.899	13.2671	6.63356		107.079	134.343	114.881	114.071	112.649	116.605	10.3731	5.18655
	110.771	88.9857	129.233	94.3417	117.365	82.0761	102.614	113.297	117.365	106.228	15.3412	5.42395		132.299	118.309	136.611	126.742	154.501	133.692	13.4945	6.74727		100.184	128.862	118.543	118.79	123.131	117.902	10.7541	5.37703
	113.273	96.3815	130.253	93.6151	126.989	80.6487	110.975	116.386	126.989	110.612	17.1461	6.06208		124.43	114.151	139.738	120.265	149.25	129.567	14.5038	7.25189		108.908	130.693	115.1	100.705	113.162	113.713	10.9868	5.49338
	104.485	94.8631	124.189	90.9153	123.523	88.1341	110.604	110.575	123.523	107.868	14.2685	5.04466		134.597	115.632	140.575	124.035	135.877	130.143	10.1172	5.05858		103.573	126.879	119.63	114.657	115.884	116.125	8.48118	4.24059
	107.361	99.3281	126.545	90.9739	117.496	88.1908	109.042	104.936	117.496	106.819	12.6495	4.47227		134.503	117.394	143.697	115.847	147.295	131.747	14.5854	7.29272		98.0352	127.439	113.941	119.628	111.794	114.167	10.8614	5.43069
	104.749	92.5015	130.283	91.8741	121.271	83.457	107.297	110.046	121.271	106.972	15.6411	5.52996		129.646	115.803	140.504	118.194	139.652	128.76	11.5854	5.79271		102.658	126.778	111.981	115.67	109.066	113.23	8.94658	4.47329
	106.402	101.888	134.863	99.5767	116.916	83.7262	107.922	117.434	116.916	109.516	14.3572	5.07602		116.395	116.259	140.226	120.12	138.076	126.215	11.9342	5.96711		105.431	126.255	105.933	111.455	104.213	110.657	9.15258	4.57629
	116.844	87.092	129.195	104.296	115.032	100.963	106.789	109.246	115.032	109.387	11.792	4.1691		126.287	121.612	135.987	114.068	134.105	126.412	9.03178	4.51589		102.452	125.854	111.323	115.376	114.692	113.939	8.41694	4.20847
	108.801	81.7795	126.216	98.387	109.653	99.4292	110.357	110.392	109.653	106.074	12.0892	4.27418		132.916	118.192	142.513	115.134	132.075	128.166	11.3247	5.66234		110.619	123.183	107.27	114.107	114.356	113.907	5.9402	2.9701
	113.378	78.9338	127.632	96.1977	112.471	88.4485	107.795	121.575	112.471	106.545	15.7558	5.5705		128.144	116.6	137.023	120.041	137.398	127.841	9.52554	4.76277		111.032	119.909	106.62	116.767	115.032	113.872	5.16813	2.58406
	109.703	78.8334	127.129	96.2559	111.539	97.829	105.426	121.307	111.539	106.618	14.3721	5.08132		127.082	117.736	135.775	105.382	130.429	123.281	11.9664	5.98321		110.529	130.89	114.482	111.036	111.713	115.73	8.61093	4.30547
	110.931	67.5449	126.764	93.7254	110.66	92.4712	99.121	126.685	110.66	104.285	18.5744	6.56704		124.346	120.131	138.9	93.3446	140.703	123.485	19.0691	9.53457		107.759	129.857	114.047	116.64	106.684	114.997	9.2994	4.6497
	109.333	77.8836	122.732	94.3404	115.963	94.5342	103.109	118.585	115.963	105.827	14.6374	5.17511		123.909	124.401	134.588	101.604	135.605	124.022	13.6795	6.83976		107.521	103.364	111.474	110.102	107.963	108.085	3.08921	1.5446
	108.375	74.8533	122.478	101.524	104.805	89.3478	98.3683	110.125	104.805	101.631	13.4673	4.76141		122.046	117.397	142.585	101.11	140.106	124.649	17.1325	8.56624		111.355	103.265	115.427	102.557	103.872	107.295	5.76662	2.88331
	101.235	71.1546	117.106	90.57	107.553	96.3932	102.865	112.244	107.553	100.741	13.672	4.83379		121.254	115.746	139.46	106.875	139.057	124.479	14.4352	7.21758		107.701	100.884	116.043	100.032	110.694	107.071	6.74229	3.37114
	109.063	99.1094	117.365	84.6684	107.111	99.928	97.9325	108.716	107.111	103.445	9.31476	3.29327		125.851	117.456	143.908	112.363	139.88	127.892	13.7334	6.8667		109.706	102.109	118.581	100.034	105.235	107.133	7.36385	3.68192
		90.8615	122.299	89.5595	105.141	89.2881	88.6223	111.189	105.141	100.263	12.6007	4.45504		124.877	122.75	137.719	112.431	129.452	125.446	9.26892	4.63446		103.721	101.869	112.961	104.672	103.023	105.249	4.43091	2.21545
