# Supplementary material for: KIF2C regulates synaptic plasticity and cognition in mice through dynamic microtubule depolymerization
Source: eLife. 2022 Feb 9;11:e72483. doi: 10.7554/eLife.72483 (PMC8828051; doi:10.7554/eLife.72483)
Supplement: Figure 7—figure supplement 1—source data 1. — Values for time in open quadrants, open entrances, number of 4 paws in open quadrants, number of head dips and number of stretch attendance postures (SAP) during elevated-zero maze test; Values for grooming time; Values for latency to platform and time in quadrants during Morris water maze; Values for freezing time change during fear conditioning test; Values for PPI; Values for time in each chamber during three-chamber test; Values for arm entries during Y-maze test. [file elife-72483-fig7-figsupp1-data1.xlsx]

## Sheet: Sheet1
Figure7- figure supplement1- source data1
FigureS1A				FigureS1A				FigureS1A						FigureS1B												FigureS1C			FigureS1D						FigureS1D										FigureS1E				FigureS1E
distance (cm)				velocity (cm/s)				time (%)						time in open(s)		open entrances		4 paws in open		head dips		SAP				grooming (s)			latency to platform(s)						T		AL		AR		OP				context %				CS %
WT	cKO			WT	cKO			WT	cKO	WT	cKO			WT	cKO	WT	cKO	WT	cKO	WT	cKO	WT	cKO			WT	cKO			WT		cKO			WT	cKO	WT	cKO	WT	cKO	WT	cKO			WT	cKO			WT
5511	6744			5.55	9.7			8.125	3.625	91.875	96.375			32.8	39.6	10	13	2	0	9	8	12	14			13.81	62.35		day	Mean	SEM	Mean	SEM		15.546	20.325	15.735	15.987	12.714	17.619	11.578	10.446			80.9762	48.9344			-13.8807
4513	5177			4.5	7.2			5.46	2.33	94.54	97.67			107.6	70.3	24	10	5	6	21	18	22	8			26.65	96.18		1	75.919	5.665	75.573	6.335		8.113	15.864	10.755	14.654	4.405	11.898	15.234	16.997			30.3218	70.9534			77.656
5393	4836			4.3	5.2			11.01	6.53	88.99	93.47			89.9	116	39	56	3	5	13	16	18	30			29.21	16.51		2	46.1683	4.383	41.3086	6.015		7.111	14.289	18.439	30.018	10.317	11.96	16.933	16.807			36.9231	45.3257			63.5025
4385	8001			4.4	7.65			4.02	6.35	95.98	93.65			94.3	48.8	33	9	12	2	18	3	28	10			24.19	47.75		3	28.016	2.528	34.1317	6.484		22.332	28.324	17.928	11.078	20.821	11.141	9.373	9.441			32.1903	78.2181			27.6634
6420	3596			6.25	4.7			4.025	2.92	95.975	97.08			39.8	56.6	20	21	2	1	7	10	13	16			33.07	12.67		4	28.4634	5.102	28.7334	4.042		12.14	11.325	11.889	2.391	13.278	21.078	15.097	5.851			12.9694	15.0689			53.6202
6112	6117			7	6.3			1.79	3.842	98.21	96.16			58.2	115.1	22	35	5	8	18	16	30	18			28.23	15.47		5	27.0335	3.664	28.8189	4.276		22.088	23.154	13.781	4.467	24.525	17.616	10.824	11.263			69.5743	77.4693			63.8089
4600	4359			6.3	4.05			2.68	7.53	97.32	92.47			70.6	131.8	27	32	8	9	4	34	23	21			41.79	48.76		6	26.9482	2.737	23.041	2.902		24.022	33.22	5.282	4.09	14.401		25.72	5.033			35.4191	47.3171			65.8709
3156	3754			4.85	4.3			1.72	2.65	98.28	97.35			50.7	79.2	13	34	6	16	9	26	12	24			13.03	2.08										13.017				8.552				25.1691	62.2609			-113.828
6063	5580			5.9	6.7			8	4.067	92	95.933			10.4	86.1	11	27	0	6	7	26	13	26			51.46	18.18																		50.3667	47.7757			-1.36452
5659	9282			7.6	9			4.142	7.391	95.858	92.609			92.2	18.4	37	8	10	2	25	4	31	10			1.64	17.29																		26.6433	86.3342			12.1756
8663	6253			7.25	7.3			6.833	5.267	93.167	94.733			73.4	97	41	32	15	8	23	19	27	12			5.2	34.25																		83.9776				-23.2973
8214	5920			9.6	4.4			3.917	9.15	96.083	90.85															11.7	11.32																		55.4571				40.0768
7866	5968			7.7	5.2			6.792	7.917	93.208	92.083															5.96	12
																										20.1	18.06
																										1.82	3
																											21.34
																											16.9
																											5.38
[truncated: 17 more columns]
