# Supplementary material for: KIF2C regulates synaptic plasticity and cognition in mice through dynamic microtubule depolymerization
Source: eLife. 2022 Feb 9;11:e72483. doi: 10.7554/eLife.72483 (PMC8828051; doi:10.7554/eLife.72483)
Supplement: Figure 7—source data 1. — Values for freezing levels during fear conditioning test of WT and cKO mice; Values for close interaction time during three-chamber test of WT and cKO mice; Values for Y-maze test of cKO+ mCherry, cKO+ KIF2 C(WT), cKO+ mNeonGreen, and cKO+ KIF2 C(G491A) mice; Values for close interaction time during three-chamber test of cKO+ mCherry, cKO+ KIF2 C(WT), cKO+ mNeonGreen, and cKO+ KIF2 C(G491A) mice. [file elife-72483-fig7-data1.xlsx]

## Sheet: Sheet1
Figure 7–source data
Figure7A				Figure7A				Figure7A				Figure7B						Figure7C						Figure7C						Figure7D						Figure7D				Figure7E						Figure7E
Entries				Alternation %				Error %				%time						context						CS						close interaction (s)						preference %				close interaction (s)						preference %
WT	cKO			WT	cKO			WT	cKO			WT		cKO				24h		7d				48h		8d				WT		cKO				WT	cKO			WT		cKO				WT	cKO
16	19			38.0952	41.1765			11.9048	52.9412			Mean	SEM	Mean	SEM			WT	cKO	WT	cKO			WT	cKO	WT	cKO			S1	E2	S1	E2			54.5185	77.4957			S1	S2	S1	S2			24.4064	21.2825
10	23			62.5	42.8571			37.5	57.1429			3.41545	1.0171	2.90875	1.00975			57.98	36.6	11.03	18.69			57.49	28.28	65.47	3.33			198.34	58.38	209.72	26.59			45.7301	57.5039			94.56	155.62	82	126.34			-1.25945	1.46628
21	20			47.3684	50			52.6316	44.4444			8.0725	1.84204	10.0956	3.46078			43.5	24.65	30.31	7.16			41.98	50.3	9.38	13.11			102.9	38.32	213.78	57.68			71.7874	71.7438			68.34	66.64	67.2	69.2			52.8074	2.53067
27	15			64	46.1538			36	53.8462			22.4442	3.23273	17.152	5.09208			51.35	12.68	32.39	18.04			73.32	64.74	26.76	36.26			206.54	33.92	169.7	27.92			40.4863	50.4556			33.2	107.5	113.62	119.52			21.115	-15.2181
15	10			61.5385	50			46.1538	50			38.315	4.51666	26.164	6.31822			32.37	43.66	21.95	9.51			50.03	52.8	36.19	6.85			155.42	65.84	284.85	93.8			40.9838	79.4635			69.9	107.32	251.55	185.1			7.75907	22.3516
18	13			56.25	27.2727			43.75	63.6364									42.87	31.19	37.31	26.49			62.98	23.82	29.21	41.25			241.04	100.9	428.2	49			63.7335	36.2571			175.35	204.85	140	220.6			32.0112	12.4527
7	11			40	44.4444			60	55.5556									52.85	34.22	16.08	7.71			59.02	9.12	21.36	18.63			168.49	37.32	113.4	53.05			15.1336	-3.71606			78.85	153.1	104.05	133.65			50.8425	1.3508
18	14			62.5	50			37.5	50									42.83	30.75	27.66	16.2			62.41	15.04	21.3	4.26			194.95	143.7	158.7	170.95			22.6918	40.3501			84.6	259.6	180.75	185.7			11.1199	9.48617
24	20			63.6364	72.2222			36.3636	33.3333									35.48	35.03	26.55	13.22			31.82	49.23	68.04	24.42			169.1	106.55	158.35	67.3			40.3895	47.1393			111.9	139.9	91.6	110.8			38.8141	-9.09091
24	26			54.5455	29.1667			45.4545	70.8333									58.63	37.99	29.1	19.84			46.17	36.93	46.8	35.95			178.4	75.75	204.45	73.45			63.3271	61.7211			92.1	208.95	132.6	110.5			16.598	-9.26456
25	32			52.1739	16.6667			43.4783	80									51.42	40.1	37.72	5.48			46.24	20.96	40.61	26.88			326.45	73.3	163.5	38.7			65.2814	71.4337			99.25	138.754	143	118.75			1.58187	3.44125
26	17			50	53.3333			45.8333	46.6667									51.74		8.29				42.58		52.5				224.7	47.2	240.35	40.05							115.1	118.8	118.55	127
31	23			48.2759	28.5714			48.2759	76.1905									42.88		19.1				57.29		34.33
[truncated: 32 more columns]
